# Supplementary material for: Macro-nutrient concentrations in Antarctic pack ice: Overall patterns and overlooked processes
Source: Oxford University Press journal article supplement (doi:10.1525/elementa.217), 2017-01-01
Supplement: elementa-5-217-s2.xlsx [file elementa-5-217-s2.xlsx]

## Sheet: ice_sections
Cruise	ice type	Station Number	Date	julian day	Latitude	Longitude:	Ice Core ID	Comments	extrapolation	logical test new station	ice thickness	Snow Thickness	Freeboard	average depth	average depth	Depth Temperature	Temperature	Lower Limit of Salinity Depth range	Upper Limit of Salinity Depth range	Bulk Salinity	Bulk dO18	Bulk Chlorophyll	Bulk POC	Bulk PON	Bulk Nitrate + Nitrite	Bulk Nitrate	Bulk Nitrate or Nitrate+Nitrite (if no nitrite )	Bulk Nitrite	Bulk Ammonium	Bulk DIN	Bulk Phosphate	Bulk Silicate	Bulk DOC	Bulk DON	DIN/phosphate	silicate/DIN	Silicate/Phosphate	Salinity-Normalized Nitrate + Nitrite	Salinity-Normalized Nitrate	Salinity-Normalized Nitrate or Nitrate+Nitrite (if no nitrite )	Salinity-Normalized Nitrite	Salinity-Normalized Ammonium	Salinity-Normalized DIN	Salinity-Normalized Phosphate	Salinity-Normalized Silicate
					degree North	degree East					m	m	m	m	%	m	degree Celsius	m	m	g kg-1	p.mil	microg l-1	micromol l-1	micromol l-1	micromol l-1	micromol l-1	micromol l-1	micromol l-1	micromol l-1	micromol l-1	micromol l-1	micromol l-1	micromol l-1	micromol l-1				micromol l-1	micromol l-1	micromol l-1	micromol l-1	micromol l-1	micromol l-1	micromol l-1	micromol l-1
WEPOLEX	First-Year	I-22/0	19811022	295	-59.215	5.132	I-22/0	results from graphs in the scientific report	no	1	0.59			0.04	6.77966			0.08	0	7.1						3.4	3.4	0.185				9							16.4254	16.4254	0.893732				43.4789
WEPOLEX	First-Year	I-22/0	19811022	295	-59.215	5.132	I-22/0	results from graphs in the scientific report	no	0	0.59			0.14	23.7288			0.2	0.08	4.5						0.9	0.9	0.0905				3.5							6.86	6.86	0.689811				26.6778
WEPOLEX	First-Year	I-22/0	19811022	295	-59.215	5.132	I-22/0	results from graphs in the scientific report	no	0	0.59			0.25	42.3729			0.3	0.2	6.2						1.05	1.05	0.1				2.1							5.80887	5.80887	0.553226				11.6177
WEPOLEX	First-Year	I-22/0	19811022	295	-59.215	5.132	I-22/0	results from graphs in the scientific report	no	0	0.59			0.34	57.6271			0.38	0.3	4.4						5.96	5.96	0.035				1.2							46.4609	46.4609	0.272841				9.35455
WEPOLEX	First-Year	I-22/0	19811022	295	-59.215	5.132	I-22/0	results from graphs in the scientific report	no	0	0.59			0.43	72.8814			0.48	0.38	4.1						0.7	0.7	0.1				2.1							5.8561	5.8561	0.836585				17.5683
WEPOLEX	First-Year	I-22/0	19811022	295	-59.215	5.132	I-22/0	results from graphs in the scientific report	no	0	0.59			0.535	90.678			0.59	0.48	4						0.85	0.85	0.0905				2.6							7.28875	7.28875	0.776037				22.295
WEPOLEX	First-Year	2-22/0	19811022	295	-59.215	5.132	2-22/0	results from graphs in the scientific report	no	1	1.16			0.07	6.03448			0.14	0	9.2						0.85	0.85	0.3				5.3							3.16902	3.16902	1.11848				19.7598
WEPOLEX	First-Year	2-22/0	19811022	295	-59.215	5.132	2-22/0	results from graphs in the scientific report	no	0	1.16			0.2	17.2414			0.26	0.14	7.7						0.6	0.6	0.22				4.3							2.67273	2.67273	0.98				19.1545
WEPOLEX	First-Year	2-22/0	19811022	295	-59.215	5.132	2-22/0	results from graphs in the scientific report	no	0	1.16			0.3	25.8621			0.34	0.26	8						0.85	0.85	0.25				3.7							3.64437	3.64437	1.07187				15.8637
WEPOLEX	First-Year	2-22/0	19811022	295	-59.215	5.132	2-22/0	results from graphs in the scientific report	no	0	1.16			0.39	33.6207			0.44	0.34	4.1						0.45	0.45	0.075				2.4							3.76463	3.76463	0.627439				20.078
WEPOLEX	First-Year	2-22/0	19811022	295	-59.215	5.132	2-22/0	results from graphs in the scientific report	no	0	1.16			0.49	42.2414			0.54	0.44	4.2						0.45	0.45	0.06				1.6							3.675	3.675	0.49				13.0667
WEPOLEX	First-Year	2-22/0	19811022	295	-59.215	5.132	2-22/0	results from graphs in the scientific report	no	0	1.16			0.57	49.1379			0.6	0.54	6.2						0.45	0.45	0.1				1.8							2.48952	2.48952	0.553226				9.95806
WEPOLEX	First-Year	2-22/0	19811022	295	-59.215	5.132	2-22/0	results from graphs in the scientific report	no	0	1.16			0.65	56.0345			0.7	0.6	10						4.74	4.74	0.26				14							16.2582	16.2582	0.8918				48.02
WEPOLEX	First-Year	2-22/0	19811022	295	-59.215	5.132	2-22/0	results from graphs in the scientific report	no	0	1.16			0.75	64.6552			0.8	0.7	6.4						1.7	1.7	0.17				5.1							9.11094	9.11094	0.911094				27.3328
WEPOLEX	First-Year	2-22/0	19811022	295	-59.215	5.132	2-22/0	results from graphs in the scientific report	no	0	1.16			0.86	74.1379			0.92	0.8	5.1						1.2	1.2	0.155				6.4							8.07059	8.07059	1.04245				43.0431
WEPOLEX	First-Year	2-22/0	19811022	295	-59.215	5.132	2-22/0	results from graphs in the scientific report	no	0	1.16			0.99	85.3448			1.06	0.92	5.7						2.75	2.75	0.17				7.3							16.5482	16.5482	1.02298				43.9281
WEPOLEX	First-Year	2-22/0	19811022	295	-59.215	5.132	2-22/0	results from graphs in the scientific report	no	0	1.16			1.11	95.6897			1.16	1.06	4.8						1.35	1.35	0.115				6.5							9.64687	9.64687	0.821771				46.4479
WEPOLEX	First-Year	3-24/0	19811024	297	-59.537	3.249	3-24/0	results from graphs in the scientific report	no	1	0.64			0.05	7.8125			0.1	0	9.9						0.9	0.9	0.475			0.1	9.9					99		3.11818	3.11818	1.64571			0.346465	34.3
WEPOLEX	First-Year	3-24/0	19811024	297	-59.537	3.249	3-24/0	results from graphs in the scientific report	no	0	0.64			0.14	21.875			0.18	0.1	4.2						1.2	1.2	0.395			0.1	5.5					55		9.8	9.8	3.22583			0.816667	44.9167
WEPOLEX	First-Year	3-24/0	19811024	297	-59.537	3.249	3-24/0	results from graphs in the scientific report	no	0	0.64			0.265	41.4062			0.31	0.22	5						0.65	0.65	0.25			0.16	4.9					30.625		4.459	4.459	1.715			1.0976	33.614
WEPOLEX	First-Year	3-24/0	19811024	297	-59.537	3.249	3-24/0	results from graphs in the scientific report	no	0	0.64			0.375	58.5938			0.44	0.31	5.5						0.9	0.9	0.25			0.3	5.9					19.6667		5.61273	5.61273	1.55909			1.87091	36.7945
WEPOLEX	First-Year	3-24/0	19811024	297	-59.537	3.249	3-24/0	results from graphs in the scientific report	no	0	0.64			0.51	79.6875			0.54	0.48	3						1.55	1.55	0.275			0.14	4.3					30.7143		17.7217	17.7217	3.14417			1.60067	49.1633
WEPOLEX	First-Year	3-24/0	19811024	297	-59.537	3.249	3-24/0	results from graphs in the scientific report	no	0	0.64			0.59	92.1875			0.64	0.54	4.2						1.35	1.35	0.415			0.13	4.5					34.6154		11.025	11.025	3.38917			1.06167	36.75
WEPOLEX	First-Year	4-24/0	19811024	297	-59.537	3.249	4-24/0	results from graphs in the scientific report	no	1	0.57			0.045	7.89474			0.09	0	5						0.45	0.45	1.35			0.12	6.7					55.8333		3.087	3.087	9.261			0.8232	45.962
WEPOLEX	First-Year	4-24/0	19811024	297	-59.537	3.249	4-24/0	results from graphs in the scientific report	no	0	0.57			0.125	21.9298			0.16	0.09	3.2						0.35	0.35	1.1			0.12	4.8					40		3.75156	3.75156	11.7906			1.28625	51.45
WEPOLEX	First-Year	4-24/0	19811024	297	-59.537	3.249	4-24/0	results from graphs in the scientific report	no	0	0.57			0.2	35.0877			0.24	0.16	3.9						0.4	0.4	0.6			0.11	5.2					47.2727		3.51795	3.51795	5.27692			0.967436	45.7333
WEPOLEX	First-Year	4-24/0	19811024	297	-59.537	3.249	4-24/0	results from graphs in the scientific report	no	0	0.57			0.28	49.1228			0.32	0.24	4.5						0.4	0.4	0.95			0.13	5.7					43.8462		3.04889	3.04889	7.24111			0.990889	43.4467
WEPOLEX	First-Year	4-24/0	19811024	297	-59.537	3.249	4-24/0	results from graphs in the scientific report	no	0	0.57			0.365	64.0351			0.41	0.32	5.8						0.85	0.85	1.15			0.14	6.2					44.2857		5.02672	5.02672	6.80086			0.827931	36.6655
WEPOLEX	First-Year	4-24/0	19811024	297	-59.537	3.249	4-24/0	results from graphs in the scientific report	no	0	0.57			0.45	78.9474			0.49	0.41	5.4						1.9	1.9	1.15			0.18	4.7					26.1111		12.0685	12.0685	7.30463			1.14333	29.8537
WEPOLEX	First-Year	4-24/0	19811024	297	-59.537	3.249	4-24/0	results from graphs in the scientific report	no	0	0.57			0.53	92.9825			0.57	0.49	3.5						2.1	2.1	1.15			0.24	5.1					21.25		20.58	20.58	11.27			2.352	49.98
WEPOLEX	First-Year	7-29/0	19811029	302	-62.002	2.259	2-22/0	results from graphs in the scientific report	no	1	0.3			0.05	16.6667			0.1	0	13.75						2.37	2.37	0.33			0.29	22.1					76.2069		5.91207	5.91207	0.8232			0.723418	55.1295
WEPOLEX	First-Year	7-29/0	19811029	302	-62.002	2.259	2-22/0	results from graphs in the scientific report	no	0	0.3			0.25	83.3333			0.3	0.2	7.2						1.19	1.19	0.41			0.15	7.2					48		5.66903	5.66903	1.95319			0.714583	34.3
WEPOLEX	First-Year	8-29/0	19811029	302	-62.002	2.259	2-22/0	results from graphs in the scientific report	no	1	0.6			0.05	8.33333			0.1	0	13.4						1.25	1.25	0.19				14.4							3.19963	3.19963	0.486343				36.8597
WEPOLEX	First-Year	8-29/0	19811029	302	-62.002	2.259	2-22/0	results from graphs in the scientific report	no	0	0.6			0.14	23.3333			0.18	0.1	5.6						1.25	1.25	0.18			0.19	7.8					41.0526		7.65625	7.65625	1.1025			1.16375	47.775
WEPOLEX	First-Year	8-29/0	19811029	302	-62.002	2.259	2-22/0	results from graphs in the scientific report	no	0	0.6			0.245	40.8333			0.29	0.2	5.4						1.3	1.3	0.12			0.17	7.2					42.3529		8.25741	8.25741	0.762222			1.07981	45.7333
WEPOLEX	First-Year	8-29/0	19811029	302	-62.002	2.259	2-22/0	results from graphs in the scientific report	no	0	0.6			0.32	53.3333			0.35	0.29	6.5						1.85	1.85	0.215			0.15	9.3					62		9.76231	9.76231	1.13454			0.791538	49.0754
WEPOLEX	First-Year	8-29/0	19811029	302	-62.002	2.259	2-22/0	results from graphs in the scientific report	no	0	0.6			0.375	62.5			0.4	0.35	6.4						3.95	3.95	0.14			0.23	7.1					30.8696		21.1695	21.1695	0.750313			1.23266	38.0516
WEPOLEX	First-Year	8-29/0	19811029	302	-62.002	2.259	2-22/0	results from graphs in the scientific report	no	0	0.6			0.45	75			0.5	0.4	4.7						1.35	1.35	0.11			0.26	6.2					23.8462		9.85213	9.85213	0.802766			1.89745	45.2468
WEPOLEX	First-Year	8-29/0	19811029	302	-62.002	2.259	2-22/0	results from graphs in the scientific report	no	0	0.6			0.55	91.6667			0.6	0.5	4						1.3	1.3	0.155			0.21	5.2					24.7619		11.1475	11.1475	1.32912			1.80075	44.59
WEPOLEX	First-Year	10-1/N	19811101	305	-62.112	2.538	2-22/0	results from graphs in the scientific report	no	1	0.7			0.05	7.14286			0.1	0	6						0.76	0.76	0.46			0.4	7.7					19.25		4.34467	4.34467	2.62967			2.28667	44.0183
WEPOLEX	First-Year	10-1/N	19811101	305	-62.112	2.538	2-22/0	results from graphs in the scientific report	no	0	0.7			0.15	21.4286			0.2	0.1	6						0.5	0.5	1.41			0.18	6.2					34.4444		2.85833	2.85833	8.0605			1.029	35.4433
WEPOLEX	First-Year	10-1/N	19811101	305	-62.112	2.538	2-22/0	results from graphs in the scientific report	no	0	0.7			0.25	35.7143			0.3	0.2	5.1						0.6	0.6	0.545			0.15	4.2					28		4.03529	4.03529	3.66539			1.00882	28.2471
WEPOLEX	First-Year	10-1/N	19811101	305	-62.112	2.538	2-22/0	results from graphs in the scientific report	no	0	0.7			0.35	50			0.4	0.3	4.7						0.5	0.5	0.35			0.57	2.7					4.73684		3.64894	3.64894	2.55426			4.15979	19.7043
WEPOLEX	First-Year	10-1/N	19811101	305	-62.112	2.538	2-22/0	results from graphs in the scientific report	no	0	0.7			0.45	64.2857			0.5	0.4	4.7						0.49	0.49	0.365			0.63	1.6					2.53968		3.57596	3.57596	2.66372			4.59766	11.6766
WEPOLEX	First-Year	10-1/N	19811101	305	-62.112	2.538	2-22/0	results from graphs in the scientific report	no	0	0.7			0.55	78.5714			0.6	0.5	3.9						5.3	5.3	0.34			0.62	1.1					1.77419		46.6128	46.6128	2.99026			5.45282	9.67436
WEPOLEX	First-Year	10-1/N	19811101	305	-62.112	2.538	2-22/0	results from graphs in the scientific report	no	0	0.7			0.65	92.8571			0.7	0.6	2.4						5.6	5.6	0.255			4.7	2.2					0.468085		80.0333	80.0333	3.64437			67.1708	31.4417
WEPOLEX	First-Year	11-1/N	19811101	305	-62.112	2.538	2-22/0	results from graphs in the scientific report	no	1	0.64			0.12	18.75			0.24	0	5.2						0.35	0.35	0.24			0.1	4.7					47		2.30865	2.30865	1.58308			0.659615	31.0019
WEPOLEX	First-Year	11-1/N	19811101	305	-62.112	2.538	2-22/0	results from graphs in the scientific report	no	0	0.64			0.29	45.3125			0.34	0.24	5						0.6	0.6	0.26			0.035	1.8					51.4286		4.116	4.116	1.7836			0.2401	12.348
WEPOLEX	First-Year	11-1/N	19811101	305	-62.112	2.538	2-22/0	results from graphs in the scientific report	no	0	0.64			0.39	60.9375			0.44	0.34	4.2						0.7	0.7	0.2			0.075	1.7					22.6667		5.71667	5.71667	1.63333			0.6125	13.8833
WEPOLEX	First-Year	11-1/N	19811101	305	-62.112	2.538	3-24/0	results from graphs in the scientific report	no	0	0.64			0.48	75			0.52	0.44	3.1						0.75	0.75	0.165			0.06	1.2					20		8.29839	8.29839	1.82565			0.663871	13.2774
WEPOLEX	First-Year	11-1/N	19811101	305	-62.112	2.538	3-24/0	results from graphs in the scientific report	no	0	0.64			0.58	90.625			0.64	0.52	2.6						0.7	0.7	0.12			0.035	1.1					31.4286		9.23462	9.23462	1.58308			0.461731	14.5115
WEPOLEX	First-Year	12-4/N	19811104	308	-62.124	1.035	3-24/0	results from graphs in the scientific report	no	1	0.68			0.05	7.35294			0.1	0	6.1						0.45	0.45	0.28			0.18	6					33.3333		2.53033	2.53033	1.57443			1.01213	33.7377
WEPOLEX	First-Year	12-4/N	19811104	308	-62.124	1.035	3-24/0	results from graphs in the scientific report	no	0	0.68			0.14	20.5882			0.18	0.1	5.6						0.9	0.9	0.18			0.16	4.5					28.125		5.5125	5.5125	1.1025			0.98	27.5625
WEPOLEX	First-Year	12-4/N	19811104	308	-62.124	1.035	3-24/0	results from graphs in the scientific report	no	0	0.68			0.215	31.6176			0.25	0.18	3.7						0.9	0.9	0.165			0.16	2.8					17.5		8.34324	8.34324	1.52959			1.48324	25.9568
WEPOLEX	First-Year	12-4/N	19811104	308	-62.124	1.035	4-24/0	results from graphs in the scientific report	no	0	0.68			0.315	46.3235			0.38	0.25	2.4						0.75	0.75	0.12			0.16	1.6					10		10.7188	10.7188	1.715			2.28667	22.8667
WEPOLEX	First-Year	12-4/N	19811104	308	-62.124	1.035	4-24/0	results from graphs in the scientific report	no	0	0.68			0.42	61.7647			0.46	0.38	4.4						0.9	0.9	0.18			0.1	2.8					28		7.01591	7.01591	1.40318			0.779545	21.8273
WEPOLEX	First-Year	12-4/N	19811104	308	-62.124	1.035	4-24/0	results from graphs in the scientific report	no	0	0.68			0.52	76.4706			0.58	0.46	5.9						0.75	0.75	0.08			0.22	2.6					11.8182		4.36017	4.36017	0.465085			1.27898	15.1153
WEPOLEX	First-Year	12-4/N	19811104	308	-62.124	1.035	4-24/0	results from graphs in the scientific report	no	0	0.68			0.63	92.6471			0.68	0.58	5.9						2.4	2.4	0.135			0.21	6					28.5714		13.9525	13.9525	0.784831			1.22085	34.8814
WEPOLEX	First-Year	13-4/N	19811104	308	-62.124	1.035	4-24/0	results from graphs in the scientific report	no	1	0.7			0.075	10.7143			0.15	0	10.9						0.5	0.5	0.19			0.23	9.6					41.7391		1.57339	1.57339	0.59789			0.723761	30.2092
WEPOLEX	First-Year	13-4/N	19811104	308	-62.124	1.035	4-24/0	results from graphs in the scientific report	no	0	0.7			0.195	27.8571			0.24	0.15	8.9						0.4	0.4	0.265			0.07	9					128.571		1.54157	1.54157	1.02129			0.269775	34.6854
WEPOLEX	First-Year	13-4/N	19811104	308	-62.124	1.035	4-24/0	results from graphs in the scientific report	no	0	0.7			0.285	40.7143			0.33	0.24	5.3						0.35	0.35	0.24			0.25	12.3					49.2		2.26509	2.26509	1.55321			1.61792	79.6019
WEPOLEX	First-Year	13-4/N	19811104	308	-62.124	1.035	4-24/0	results from graphs in the scientific report	no	0	0.7			0.375	53.5714			0.42	0.33	5.5						0.3	0.3	0.15			0.15	1.8					12		1.87091	1.87091	0.935455			0.935455	11.2255
WEPOLEX	First-Year	13-4/N	19811104	308	-62.124	1.035	2-22/0	results from graphs in the scientific report	no	0	0.7			0.455	65			0.49	0.42	4.5						0.5	0.5	0.095			0.25	3.3					13.2		3.81111	3.81111	0.724111			1.90556	25.1533
WEPOLEX	First-Year	13-4/N	19811104	308	-62.124	1.035	2-22/0	results from graphs in the scientific report	no	0	0.7			0.535	76.4286			0.58	0.49	5						0.5	0.5	0.2			0.52	2.3					4.42308		3.43	3.43	1.372			3.5672	15.778
WEPOLEX	First-Year	13-4/N	19811104	308	-62.124	1.035	2-22/0	results from graphs in the scientific report	no	0	0.7			0.64	91.4286			0.7	0.58	4.8						1.15	1.15	0.11			0.63	4.1					6.50794		8.21771	8.21771	0.786042			4.50188	29.2979
WEPOLEX	First-Year	14-4/N	19811104	308	-62.124	1.035	2-22/0	results from graphs in the scientific report	no	1	0.69			0.04	5.7971			0.08	0	4.5						0.8	0.8	0.2			0.19	4.7					24.7368		6.09778	6.09778	1.52444			1.44822	35.8244
WEPOLEX	First-Year	14-4/N	19811104	308	-62.124	1.035	2-22/0	results from graphs in the scientific report	no	0	0.69			0.11	15.942			0.14	0.08	3.8						0.75	0.75	0.19			0.22	5					22.7273		6.76974	6.76974	1.715			1.98579	45.1316
WEPOLEX	First-Year	14-4/N	19811104	308	-62.124	1.035	2-22/0	results from graphs in the scientific report	no	0	0.69			0.18	26.087			0.22	0.14	4						0.35	0.35	0.13			0.22	4.3					19.5455		3.00125	3.00125	1.11475			1.8865	36.8725
WEPOLEX	First-Year	14-4/N	19811104	308	-62.124	1.035	2-22/0	results from graphs in the scientific report	no	0	0.69			0.255	36.9565			0.29	0.22	2.6						0.35	0.35	0.13			0.13	2.9					22.3077		4.61731	4.61731	1.715			1.715	38.2577
WEPOLEX	First-Year	14-4/N	19811104	308	-62.124	1.035	2-22/0	results from graphs in the scientific report	no	0	0.69			0.32	46.3768			0.35	0.29	3.6						0.7	0.7	0.175			0.19	3					15.7895		6.66944	6.66944	1.66736			1.81028	28.5833
WEPOLEX	First-Year	14-4/N	19811104	308	-62.124	1.035	2-22/0	results from graphs in the scientific report	no	0	0.69			0.395	57.2464			0.44	0.35	3.9						1.2	1.2	0.14			0.22	3.1					14.0909		10.5538	10.5538	1.23128			1.93487	27.2641
WEPOLEX	First-Year	14-4/N	19811104	308	-62.124	1.035	2-22/0	results from graphs in the scientific report	no	0	0.69			0.475	68.8406			0.51	0.44	4.7						0.8	0.8	0.18			0.3	1.6					5.33333		5.8383	5.8383	1.31362			2.18936	11.6766
WEPOLEX	First-Year	14-4/N	19811104	308	-62.124	1.035	2-22/0	results from graphs in the scientific report	no	0	0.69			0.54	78.2609			0.57	0.51	4						0.8	0.8	0.18			0.27	1.2					4.44444		6.86	6.86	1.5435			2.31525	10.29
WEPOLEX	First-Year	14-4/N	19811104	308	-62.124	1.035	2-22/0	results from graphs in the scientific report	no	0	0.69			0.6	86.9565			0.63	0.57	4.1						0.5	0.5	1.7			0.15	0.7					4.66667		4.18293	4.18293	14.222			1.25488	5.8561
WEPOLEX	First-Year	14-4/N	19811104	308	-62.124	1.035	2-22/0	results from graphs in the scientific report	no	0	0.69			0.66	95.6522			0.69	0.63	5						1.55	1.55	0.39			0.2	2.3					11.5		10.633	10.633	2.6754			1.372	15.778
WEPOLEX	First-Year	16-8/N-to check	19811108	312	-60.577	0.435	2-22/0	results from graphs in the scientific report	no	1	0.68			0.06	8.82353			0.12	0	9.2						0.7	0.7	0.195			0.15	2.2					14.6667		2.60978	2.60978	0.727011			0.559239	8.20217
WEPOLEX	First-Year	16-8/N-to check	19811108	312	-60.577	0.435	2-22/0	results from graphs in the scientific report	no	0	0.68			0.16	23.5294			0.2	0.12	3.4						0.3	0.3	0.135			0.09	4.3					47.7778		3.02647	3.02647	1.36191			0.907941	43.3794
WEPOLEX	First-Year	16-8/N-to check	19811108	312	-60.577	0.435	3-24/0	results from graphs in the scientific report	no	0	0.68			0.25	36.7647			0.3	0.2	3.3						0.7	0.7	0.15			0.07	4					57.1429		7.27576	7.27576	1.55909			0.727576	41.5758
WEPOLEX	First-Year	16-8/N-to check	19811108	312	-60.577	0.435	3-24/0	results from graphs in the scientific report	no	0	0.68			0.345	50.7353			0.39	0.3	3.2						1	1	0.15			0.12	3.7					30.8333		10.7187	10.7187	1.60781			1.28625	39.6594
WEPOLEX	First-Year	16-8/N-to check	19811108	312	-60.577	0.435	3-24/0	results from graphs in the scientific report	no	0	0.68			0.43	63.2353			0.47	0.39	4.2						0.7	0.7	0.115			0.13	2.1					16.1538		5.71667	5.71667	0.939167			1.06167	17.15
WEPOLEX	First-Year	16-8/N-to check	19811108	312	-60.577	0.435	3-24/0	results from graphs in the scientific report	no	0	0.68			0.5	73.5294			0.53	0.47	4.1						0.6	0.6	0.065			0.08	2.2					27.5		5.01951	5.01951	0.54378			0.669268	18.4049
WEPOLEX	First-Year	16-8/N-to check	19811108	312	-60.577	0.435	3-24/0	results from graphs in the scientific report	no	0	0.68			0.57	83.8235			0.61	0.53	4						0.6	0.6	0.08			0.11	1.6					14.5455		5.145	5.145	0.686			0.94325	13.72
WEPOLEX	First-Year	16-8/N-to check	19811108	312	-60.577	0.435	3-24/0	results from graphs in the scientific report	no	0	0.68			0.645	94.8529			0.68	0.61	8						2.6	2.6	0.21			0.02	5.5					275		11.1475	11.1475	0.900375			0.08575	23.5812
WEPOLEX	First-Year	16-8/N	19811108	312	-60.577	0.435	4-24/0	results from graphs in the scientific report	no	1	0.68			0.045	6.61765			0.09	0	5.1						0.75	0.75	0.27			0.15	4.2					28		5.04412	5.04412	1.81588			1.00882	28.2471
WEPOLEX	First-Year	16-8/N	19811108	312	-60.577	0.435	4-24/0	results from graphs in the scientific report	no	0	0.68			0.115	16.9118			0.14	0.09	2.4						1.1	1.1	0.39			0.12	6.6					55		15.7208	15.7208	5.57375			1.715	94.325
WEPOLEX	First-Year	16-8/N	19811108	312	-60.577	0.435	4-24/0	results from graphs in the scientific report	no	0	0.68			0.21	30.8824			0.28	0.14	4.9						1.5	1.5	0.285			0.25	6.6					26.4		10.5	10.5	1.995			1.75	46.2
WEPOLEX	First-Year	16-8/N	19811108	312	-60.577	0.435	4-24/0	results from graphs in the scientific report	no	0	0.68			0.325	47.7941			0.37	0.28	2.3						0.85	0.85	0.165			0.1	3.2					32		12.6761	12.6761	2.46065			1.4913	47.7217
WEPOLEX	First-Year	16-8/N	19811108	312	-60.577	0.435	4-24/0	results from graphs in the scientific report	no	0	0.68			0.405	59.5588			0.44	0.37	3.7						0.45	0.45	0.13			0.09	2.2					24.4444		4.17162	4.17162	1.20514			0.834324	20.3946
WEPOLEX	First-Year	16-8/N	19811108	312	-60.577	0.435	4-24/0	results from graphs in the scientific report	no	0	0.68			0.48	70.5882			0.52	0.44	3.8						0.95	0.95	0.48			0.13	4.2					32.3077		8.575	8.575	4.33263			1.17342	37.9105
WEPOLEX	First-Year	16-8/N	19811108	312	-60.577	0.435	4-24/0	results from graphs in the scientific report	no	0	0.68			0.56	82.3529			0.6	0.52	3.9						0.7	0.7	0.185			0.37	3.1					8.37838		6.15641	6.15641	1.62705			3.2541	27.2641
WEPOLEX	First-Year	16-8/N	19811108	312	-60.577	0.435	4-24/0	results from graphs in the scientific report	no	0	0.68			0.64	94.1176			0.68	0.6	4.7						3.2	3.2	0.155			0.46	7.7					16.7391		23.3532	23.3532	1.13117			3.35702	56.1936
WEPOLEX	First-Year	26-13/N	19811113	317	-59.091	0.45	2-22/0	results from graphs in the scientific report	no	1	0.55			0.05	9.09091			0.1	0	6.9						1.2	1.2	0.335			0.12	10.4					86.6667		5.96522	5.96522	1.66529			0.596522	51.6986
WEPOLEX	First-Year	26-13/N	19811113	317	-59.091	0.45	2-22/0	results from graphs in the scientific report	no	0	0.55			0.15	27.2727			0.2	0.1	5.3						1.4	1.4	0.345			0.19	9.2					48.4211		9.06038	9.06038	2.23274			1.22962	59.5396
WEPOLEX	First-Year	26-13/N	19811113	317	-59.091	0.45	2-22/0	results from graphs in the scientific report	no	0	0.55			0.26	47.2727			0.32	0.2	3.9						0.65	0.65	0.26			0.06	2.7					45		5.71667	5.71667	2.28667			0.527692	23.7462
WEPOLEX	First-Year	26-13/N	19811113	317	-59.091	0.45	2-22/0	results from graphs in the scientific report	no	0	0.55			0.365	66.3636			0.41	0.32	4.1						1.15	1.15	0.2			0.12	3.5					29.1667		9.62073	9.62073	1.67317			1.0039	29.2805
WEPOLEX	First-Year	26-13/N	19811113	317	-59.091	0.45	2-22/0	results from graphs in the scientific report	no	0	0.55			0.48	87.2727			0.55	0.41	4						1.5	1.5	0.24			0.06	3.3					55		12.8625	12.8625	2.058			0.5145	28.2975
ANTARKTIS V/2	First-Year	291	19860731	213	-65.3523	3.0203	52212-1	In his calculations Gerhard Dieckmann considered a diameter of 10cm.	no	1	0.5			0.055	11			0.1	0.01	22.6		0.05			18.6		18.6				3.5	20.1					5.74286	28.2292		28.2292				5.31195	30.5058
ANTARKTIS V/2	First-Year	291	19860731	213	-65.3523	3.0203	52212-1	In his calculations Gerhard Dieckmann considered a diameter of 10cm.	no	0	0.5			0.12	24			0.14	0.1	10.9		0.13			6.6		6.6				0.7	7.9					11.2857	20.7688		20.7688				2.20275	24.8596
ANTARKTIS V/2	First-Year	291	19860731	213	-65.3523	3.0203	52212-1	In his calculations Gerhard Dieckmann considered a diameter of 10cm.	no	0	0.5			0.155	31			0.17	0.14	6.9		0.18			6.6		6.6				0.5	7.4					14.8	32.8087		32.8087				2.48551	36.7855
ANTARKTIS V/2	First-Year	291	19860731	213	-65.3523	3.0203	52212-1	In his calculations Gerhard Dieckmann considered a diameter of 10cm.	no	0	0.5			0.185	37			0.2	0.17	6.9		0.27			6.7		6.7				0.8	6.9					8.625	33.3058		33.3058				3.97681	34.3
ANTARKTIS V/2	First-Year	291	19860731	213	-65.3523	3.0203	52212-1	In his calculations Gerhard Dieckmann considered a diameter of 10cm.	no	0	0.5			0.23	46			0.26	0.2	5.9		0.6			4.9		4.9				0.7	6.2					8.85714	28.4864		28.4864				4.06949	36.0441
ANTARKTIS V/2	First-Year	291	19860731	213	-65.3523	3.0203	52212-1	In his calculations Gerhard Dieckmann considered a diameter of 10cm.	no	0	0.5			0.28	56			0.3	0.26	4.9		0.25			4.1		4.1				0.2	4.5					22.5	28.7		28.7				1.4	31.5
ANTARKTIS V/2	First-Year	291	19860731	213	-65.3523	3.0203	52212-1	In his calculations Gerhard Dieckmann considered a diameter of 10cm.	no	0	0.5			0.35	70			0.4	0.3	5.3		0.58			6.1		6.1				0.9	7.7					8.55556	39.4774		39.4774				5.82453	49.8321
ANTARKTIS V/2	First-Year	291	19860731	213	-65.3523	3.0203	52212-1	In his calculations Gerhard Dieckmann considered a diameter of 10cm.	no	0	0.5			0.45	90			0.5	0.4	7		0.6			7.2		7.2				1.4	0.9					0.642857	35.28		35.28				6.86	4.41
ANTARKTIS V/2	First-Year	293	19860802	215	-64.3066	4.2651	52214-1	In his calculations Gerhard Dieckmann considered a diameter of 10cm.	no	1	0.57			0.02	3.50877			0.04	0	32.9		0.02			23.1		23.1				0.55	31.5					57.2727	24.083		24.083				0.573404	32.8404
ANTARKTIS V/2	First-Year	293	19860802	215	-64.3066	4.2651	52214-1	In his calculations Gerhard Dieckmann considered a diameter of 10cm.	no	0	0.57			0.065	11.4035			0.09	0.04	24.5		0.03			17.9		17.9				0.2	20.9					104.5	25.06		25.06				0.28	29.26
ANTARKTIS V/2	First-Year	293	19860802	215	-64.3066	4.2651	52214-1	In his calculations Gerhard Dieckmann considered a diameter of 10cm.	no	0	0.57			0.14	24.5614			0.19	0.09	9.3		0.04			13.1		13.1				0.11	12.4					112.727	48.3151		48.3151				0.405699	45.7333
ANTARKTIS V/2	First-Year	293	19860802	215	-64.3066	4.2651	52214-1	In his calculations Gerhard Dieckmann considered a diameter of 10cm.	no	0	0.57			0.24	42.1053			0.29	0.19	4.3		0.12			6.7		6.7				0.02	6.3					315	53.4442		53.4442				0.159535	50.2535
ANTARKTIS V/2	First-Year	293	19860802	215	-64.3066	4.2651	52214-1	In his calculations Gerhard Dieckmann considered a diameter of 10cm.	no	0	0.57			0.34	59.6491			0.39	0.29	3.3		0.14			4.4		4.4				0	5						45.7333		45.7333				0	51.9697
ANTARKTIS V/2	First-Year	293	19860802	215	-64.3066	4.2651	52214-1	In his calculations Gerhard Dieckmann considered a diameter of 10cm.	no	0	0.57			0.435	76.3158			0.48	0.39	4.1		0.15			5.5		5.5				0.01	6.2					620	46.0122		46.0122				0.0836585	51.8683
ANTARKTIS V/2	First-Year	293	19860802	215	-64.3066	4.2651	52214-1	In his calculations Gerhard Dieckmann considered a diameter of 10cm.	no	0	0.57			0.525	92.1053			0.57	0.48	4.2		0.36			5.7		5.7				0.04	6.7					167.5	46.55		46.55				0.326667	54.7167
ANTARKTIS V/2	First-Year	297	19860803	216	-64.2502	5.5823	52215-1	In his calculations Gerhard Dieckmann considered a diameter of 10cm.	no	1	0.59			0.02	3.38983			0.04	0	33.4		0.02			26.9		26.9				0.4	30					75	27.6249		27.6249				0.410778	30.8084
ANTARKTIS V/2	First-Year	297	19860803	216	-64.2502	5.5823	52215-1	In his calculations Gerhard Dieckmann considered a diameter of 10cm.	no	0	0.59			0.075	12.7119			0.11	0.04	10.5		0.02			11.9		11.9				0.14	18.7					133.571	38.8733		38.8733				0.457333	61.0867
ANTARKTIS V/2	First-Year	297	19860803	216	-64.2502	5.5823	52215-1	In his calculations Gerhard Dieckmann considered a diameter of 10cm.	no	0	0.59			0.125	21.1864			0.14	0.11	11.1		0.14			10.8		10.8				0.13	14.4					110.769	33.373		33.373				0.401712	44.4973
ANTARKTIS V/2	First-Year	297	19860803	216	-64.2502	5.5823	52215-1	In his calculations Gerhard Dieckmann considered a diameter of 10cm.	no	0	0.59			0.175	29.661			0.21	0.14	7.6		0.16			9.5		9.5				0.04	10.5					262.5	42.875		42.875				0.180526	47.3882
ANTARKTIS V/2	First-Year	297	19860803	216	-64.2502	5.5823	52215-1	In his calculations Gerhard Dieckmann considered a diameter of 10cm.	no	0	0.59			0.24	40.678			0.27	0.21	7.3		0.18			7.5		7.5				0.03	10.3					343.333	35.2397		35.2397				0.140959	48.3959
ANTARKTIS V/2	First-Year	297	19860803	216	-64.2502	5.5823	52215-1	In his calculations Gerhard Dieckmann considered a diameter of 10cm.	no	0	0.59			0.29	49.1525			0.31	0.27	8.6		0.18			8.6		8.6				0.03	11.1					370	34.3		34.3				0.119651	44.2709
ANTARKTIS V/2	First-Year	297	19860803	216	-64.2502	5.5823	52215-1	In his calculations Gerhard Dieckmann considered a diameter of 10cm.	no	0	0.59			0.34	57.6271			0.37	0.31	6.8		0.4			6.3		6.3				0.02	7.6					380	31.7779		31.7779				0.100882	38.3353
ANTARKTIS V/2	First-Year	297	19860803	216	-64.2502	5.5823	52215-1	In his calculations Gerhard Dieckmann considered a diameter of 10cm.	no	0	0.59			0.39	66.1017			0.41	0.37	5.5		0.56			4.8		4.8				0.04	7					175	29.9345		29.9345				0.249455	43.6545
ANTARKTIS V/2	First-Year	297	19860803	216	-64.2502	5.5823	52215-1	In his calculations Gerhard Dieckmann considered a diameter of 10cm.	no	0	0.59			0.425	72.0339			0.44	0.41	5		0.56			4.9		4.9				0.03	6.5					216.667	33.614		33.614				0.2058	44.59
ANTARKTIS V/2	First-Year	297	19860803	216	-64.2502	5.5823	52215-1	In his calculations Gerhard Dieckmann considered a diameter of 10cm.	no	0	0.59			0.47	79.661			0.5	0.44	3.6		0.56			3.6		3.6				0.05	5.3					106	34.3		34.3				0.476389	50.4972
ANTARKTIS V/2	First-Year	297	19860803	216	-64.2502	5.5823	52215-1	In his calculations Gerhard Dieckmann considered a diameter of 10cm.	no	0	0.59			0.545	92.3729			0.59	0.5	3.9		0.25			5.1		5.1				0.04	5.3					132.5	44.8538		44.8538				0.351795	46.6128
ANTARKTIS V/2	First-Year	303	19860804	217	-65.2047	7.5971	52215-1	In his calculations Gerhard Dieckmann considered a diameter of 10cm.	no	1	0.54			0.02	3.7037			0.04	0	32.5		0.21			38.9		38.9				0.8	65.3					81.625	41.0545		41.0545				0.844308	68.9166
ANTARKTIS V/2	First-Year	303	19860804	217	-65.2047	7.5971	52215-1	In his calculations Gerhard Dieckmann considered a diameter of 10cm.	no	0	0.54			0.07	12.963			0.1	0.04	23.7		0.05			25.5		25.5				0.61	43.4					71.1475	36.9051		36.9051				0.882827	62.811
ANTARKTIS V/2	First-Year	303	19860804	217	-65.2047	7.5971	52215-1	In his calculations Gerhard Dieckmann considered a diameter of 10cm.	no	0	0.54			0.15	27.7778			0.2	0.1	11.1		0.08			8.7		8.7				0.19	15.3					80.5263	26.8838		26.8838				0.587117	47.2784
ANTARKTIS V/2	First-Year	303	19860804	217	-65.2047	7.5971	52215-1	In his calculations Gerhard Dieckmann considered a diameter of 10cm.	no	0	0.54			0.225	41.6667			0.25	0.2	4.4		0.6			5.3		5.3				0.03	7.8					260	41.3159		41.3159				0.233864	60.8045
ANTARKTIS V/2	First-Year	303	19860804	217	-65.2047	7.5971	52215-1	In his calculations Gerhard Dieckmann considered a diameter of 10cm.	no	0	0.54			0.265	49.0741			0.28	0.25	5.5		0.73			3.8		3.8				0.02	7.5					375	23.6982		23.6982				0.124727	46.7727
ANTARKTIS V/2	First-Year	303	19860804	217	-65.2047	7.5971	52215-1	In his calculations Gerhard Dieckmann considered a diameter of 10cm.	no	0	0.54			0.295	54.6296			0.31	0.28	5.8		0.28			3.7		3.7				0.04	19.9					497.5	21.881		21.881				0.236552	117.684
ANTARKTIS V/2	First-Year	303	19860804	217	-65.2047	7.5971	52215-1	In his calculations Gerhard Dieckmann considered a diameter of 10cm.	no	0	0.54			0.37	68.5185			0.43	0.31	3.4		0.39			3.3		3.3				0.07	5.7					81.4286	33.2912		33.2912				0.706176	57.5029
ANTARKTIS V/2	First-Year	303	19860804	217	-65.2047	7.5971	52215-1	In his calculations Gerhard Dieckmann considered a diameter of 10cm.	no	0	0.54			0.46	85.1852			0.49	0.43	4.1		0.89			3.3		3.3				0.03	4.1					136.667	27.6073		27.6073				0.250976	34.3
ANTARKTIS V/2	First-Year	303	19860804	217	-65.2047	7.5971	52215-1	In his calculations Gerhard Dieckmann considered a diameter of 10cm.	no	0	0.54			0.515	95.3704			0.54	0.49	5.3		0.83			5.6		5.6				0.05	7.5					150	36.2415		36.2415				0.323585	48.5377
ANTARKTIS V/2	First-Year	308	19860805	218	-66.0412	6.2704	52217-1	In his calculations Gerhard Dieckmann considered a diameter of 10cm.	no	1	0.55			0.015	2.72727			0.03	0	21.4		1.52			7		7				0.03	12.5					416.667	11.2196		11.2196				0.0480841	20.035
ANTARKTIS V/2	First-Year	308	19860805	218	-66.0412	6.2704	52217-1	In his calculations Gerhard Dieckmann considered a diameter of 10cm.	no	0	0.55			0.055	10			0.08	0.03	16.5		1.52			6.9		6.9				0.03	15.6					520	14.3436		14.3436				0.0623636	32.4291
ANTARKTIS V/2	First-Year	308	19860805	218	-66.0412	6.2704	52217-1	In his calculations Gerhard Dieckmann considered a diameter of 10cm.	no	0	0.55			0.1	18.1818			0.12	0.08	8.7		4.11			1.8		1.8				0.1	5.1					51	7.09655		7.09655				0.394253	20.1069
ANTARKTIS V/2	First-Year	308	19860805	218	-66.0412	6.2704	52217-1	In his calculations Gerhard Dieckmann considered a diameter of 10cm.	no	0	0.55			0.155	28.1818			0.19	0.12	4.3		4.97			2.7		2.7				0.02	3.4					170	21.5372		21.5372				0.159535	27.1209
ANTARKTIS V/2	First-Year	308	19860805	218	-66.0412	6.2704	52217-1	In his calculations Gerhard Dieckmann considered a diameter of 10cm.	no	0	0.55			0.22	40			0.25	0.19	3.8		1.54			1.3		1.3				0	3.5						11.7342		11.7342				0	31.5921
ANTARKTIS V/2	First-Year	308	19860805	218	-66.0412	6.2704	52217-1	In his calculations Gerhard Dieckmann considered a diameter of 10cm.	no	0	0.55			0.27	49.0909			0.29	0.25	2.5		2.19			0.9		0.9				0.01	1.9					190	12.348		12.348				0.1372	26.068
ANTARKTIS V/2	First-Year	308	19860805	218	-66.0412	6.2704	52217-1	In his calculations Gerhard Dieckmann considered a diameter of 10cm.	no	0	0.55			0.315	57.2727			0.34	0.29	2.2		6.17			1.5		1.5				0.03	0.8					26.6667	23.3864		23.3864				0.467727	12.4727
ANTARKTIS V/2	First-Year	308	19860805	218	-66.0412	6.2704	52217-1	In his calculations Gerhard Dieckmann considered a diameter of 10cm.	no	0	0.55			0.355	64.5455			0.37	0.34	2.7		5.82			2.2		2.2				0.08	0.9					11.25	27.9481		27.9481				1.0163	11.4333
ANTARKTIS V/2	First-Year	308	19860805	218	-66.0412	6.2704	52217-1	In his calculations Gerhard Dieckmann considered a diameter of 10cm.	no	0	0.55			0.38	69.0909			0.39	0.37	3.6		7.3			1.4		1.4				0.14	1.2					8.57143	13.3389		13.3389				1.33389	11.4333
ANTARKTIS V/2	First-Year	308	19860805	218	-66.0412	6.2704	52217-1	In his calculations Gerhard Dieckmann considered a diameter of 10cm.	no	0	0.55			0.44	80			0.49	0.39	1.9		6.68			1.8		1.8				0.1	7.9					79	32.4947		32.4947				1.80526	142.616
ANTARKTIS V/2	First-Year	308	19860805	218	-66.0412	6.2704	52217-1	In his calculations Gerhard Dieckmann considered a diameter of 10cm.	no	0	0.55			0.52	94.5455			0.55	0.49	2.4		3.64			3		3				0.05	3.8					76	42.875		42.875				0.714583	54.3083
ANTARKTIS V/2	First-Year	308	19860805	218	-66.0412	6.2704	52217-6	In his calculations Gerhard Dieckmann considered a diameter of 10cm.	no	1	3.15			0.02	0.634921			0.04	0	0.18		0.19			0.6		0.6				0.01	0.4					40	114.333		114.333				1.90556	76.2222
ANTARKTIS V/2	First-Year	308	19860805	218	-66.0412	6.2704	52217-6	In his calculations Gerhard Dieckmann considered a diameter of 10cm.	no	0	3.15			0.085	2.69841			0.13	0.04	0.18		0.01			2.7		2.7				0	0.4						514.5		514.5				0	76.2222
ANTARKTIS V/2	First-Year	308	19860805	218	-66.0412	6.2704	52217-6	In his calculations Gerhard Dieckmann considered a diameter of 10cm.	no	0	3.15			0.175	5.55556			0.22	0.13	0.18		0.04			3.5		3.5				0	0.1						666.944		666.944				0	19.0556
ANTARKTIS V/2	First-Year	308	19860805	218	-66.0412	6.2704	52217-6	In his calculations Gerhard Dieckmann considered a diameter of 10cm.	no	0	3.15			0.3	9.52381			0.38	0.22	0.18		0.05			3.2		3.2				0	0.1						609.778		609.778				0	19.0556
ANTARKTIS V/2	First-Year	308	19860805	218	-66.0412	6.2704	52217-6	In his calculations Gerhard Dieckmann considered a diameter of 10cm.	no	0	3.15			0.44	13.9683			0.5	0.38	3.18		0.06			6.7		6.7				0.11	7.8					70.9091	72.2673		72.2673				1.18648	84.1321
ANTARKTIS V/2	First-Year	308	19860805	218	-66.0412	6.2704	52217-6	In his calculations Gerhard Dieckmann considered a diameter of 10cm.	no	0	3.15			0.52	16.5079			0.54	0.5	8.68		0.21			7.3		7.3				0.07	9.1					130	28.8468		28.8468				0.276613	35.9597
ANTARKTIS V/2	First-Year	308	19860805	218	-66.0412	6.2704	52217-6	In his calculations Gerhard Dieckmann considered a diameter of 10cm.	no	0	3.15			0.555	17.619			0.57	0.54	8.45		0.26			6.9		6.9				0.08	10.1					126.25	28.0083		28.0083				0.324734	40.9976
ANTARKTIS V/2	First-Year	308	19860805	218	-66.0412	6.2704	52217-6	In his calculations Gerhard Dieckmann considered a diameter of 10cm.	no	0	3.15			0.585	18.5714			0.6	0.57	11.63		0.41			10.9		10.9				0.16	15.4					96.25	32.147		32.147				0.471883	45.4187
ANTARKTIS V/2	First-Year	308	19860805	218	-66.0412	6.2704	52217-6	In his calculations Gerhard Dieckmann considered a diameter of 10cm.	no	0	3.15			0.625	19.8413			0.65	0.6	14.54		0.68			13.2		13.2				0.18	18.4					102.222	31.1389		31.1389				0.424622	43.4058
ANTARKTIS V/2	First-Year	308	19860805	218	-66.0412	6.2704	52217-6	In his calculations Gerhard Dieckmann considered a diameter of 10cm.	no	0	3.15			0.67	21.2698			0.69	0.65	8.45		0.38			11.3		11.3				0.22	17.7					80.4545	45.8686		45.8686				0.893018	71.8473
ANTARKTIS V/2	First-Year	308	19860805	218	-66.0412	6.2704	52217-6	In his calculations Gerhard Dieckmann considered a diameter of 10cm.	no	0	3.15			0.735	23.3333			0.78	0.69	5		0.21			7.1		7.1				0.21	8.6					40.9524	48.706		48.706				1.4406	58.996
ANTARKTIS V/2	First-Year	308	19860805	218	-66.0412	6.2704	52217-6	In his calculations Gerhard Dieckmann considered a diameter of 10cm.	no	0	3.15			0.825	26.1905			0.87	0.78	1.9		0.25			4.1		4.1				0.07	2.7					38.5714	74.0158		74.0158				1.26368	48.7421
ANTARKTIS V/2	First-Year	308	19860805	218	-66.0412	6.2704	52217-6	In his calculations Gerhard Dieckmann considered a diameter of 10cm.	no	0	3.15			0.885	28.0952			0.9	0.87	2.12		0.46			1.6		1.6				0.02	1.2					60	25.8868		25.8868				0.323585	19.4151
ANTARKTIS V/2	First-Year	308	19860805	218	-66.0412	6.2704	52217-6	In his calculations Gerhard Dieckmann considered a diameter of 10cm.	no	0	3.15			0.915	29.0476			0.93	0.9	2.21		0.5			1.6		1.6				0.03	1.5					50	24.8326		24.8326				0.465611	23.2805
ANTARKTIS V/2	First-Year	308	19860805	218	-66.0412	6.2704	52217-6	In his calculations Gerhard Dieckmann considered a diameter of 10cm.	no	0	3.15			0.945	30			0.96	0.93	3.27		0.75			3.7		3.7				0.04	1.8					45	38.8104		38.8104				0.419572	18.8807
ANTARKTIS V/2	First-Year	308	19860805	218	-66.0412	6.2704	52217-6	In his calculations Gerhard Dieckmann considered a diameter of 10cm.	no	0	3.15			0.995	31.5873			1.03	0.96	4.8		1.12			4.7		4.7				0.17	7.6					44.7059	33.5854		33.5854				1.21479	54.3083
ANTARKTIS V/2	First-Year	308	19860805	218	-66.0412	6.2704	52217-6	In his calculations Gerhard Dieckmann considered a diameter of 10cm.	no	0	3.15			1.05	33.3333			1.07	1.03	4.27		0.4			0.9		0.9				0.05	1.6					32	7.22951		7.22951				0.401639	12.8525
ANTARKTIS V/2	First-Year	308	19860805	218	-66.0412	6.2704	52217-6	In his calculations Gerhard Dieckmann considered a diameter of 10cm.	no	0	3.15			1.11	35.2381			1.15	1.07	2.7		0.2			1.9		1.9				0.09	2.9					32.2222	24.137		24.137				1.14333	36.8407
ANTARKTIS V/2	First-Year	308	19860805	218	-66.0412	6.2704	52217-6	In his calculations Gerhard Dieckmann considered a diameter of 10cm.	no	0	3.15			1.165	36.9841			1.18	1.15	3.87		0.34			3		3				0.02	2.7					135	26.5891		26.5891				0.177261	23.9302
ANTARKTIS V/2	First-Year	308	19860805	218	-66.0412	6.2704	52217-6	In his calculations Gerhard Dieckmann considered a diameter of 10cm.	no	0	3.15			1.23	39.0476			1.28	1.18	2		0.1			2.7		2.7				0.04	3					75	46.305		46.305				0.686	51.45
ANTARKTIS V/2	First-Year	308	19860805	218	-66.0412	6.2704	52217-6	In his calculations Gerhard Dieckmann considered a diameter of 10cm.	no	0	3.15			1.34	42.5397			1.4	1.28	3.67		0.15			2.2		2.2				0.03	2.8					93.3333	20.5613		20.5613				0.280381	26.1689
ANTARKTIS V/2	First-Year	308	19860805	218	-66.0412	6.2704	52217-6	In his calculations Gerhard Dieckmann considered a diameter of 10cm.	no	0	3.15			1.465	46.5079			1.53	1.4	4.4		0.3			0.6		0.6				0.04	1.9					47.5	4.67727		4.67727				0.311818	14.8114
ANTARKTIS V/2	First-Year	308	19860805	218	-66.0412	6.2704	52217-6	In his calculations Gerhard Dieckmann considered a diameter of 10cm.	no	0	3.15			1.57	49.8413			1.61	1.53	4.6		0.99			2.6		2.6				0.1	3.9					39	19.387		19.387				0.745652	29.0804
ANTARKTIS V/2	First-Year	308	19860805	218	-66.0412	6.2704	52217-6	In his calculations Gerhard Dieckmann considered a diameter of 10cm.	no	0	3.15			1.67	53.0159			1.73	1.61	5.2		1.45			1.1		1.1				0	2.7						7.25577		7.25577				0	17.8096
ANTARKTIS V/2	First-Year	308	19860805	218	-66.0412	6.2704	52217-6	In his calculations Gerhard Dieckmann considered a diameter of 10cm.	no	0	3.15			1.79	56.8254			1.85	1.73	4.1		0.44			1		1				0.06	3.5					58.3333	8.36585		8.36585				0.501951	29.2805
ANTARKTIS V/2	First-Year	308	19860805	218	-66.0412	6.2704	52217-6	In his calculations Gerhard Dieckmann considered a diameter of 10cm.	no	0	3.15			1.88	59.6825			1.91	1.85	4.88		1.05			0.7		0.7				0.04	2.6					65	4.92008		4.92008				0.281148	18.2746
ANTARKTIS V/2	First-Year	308	19860805	218	-66.0412	6.2704	52217-6	In his calculations Gerhard Dieckmann considered a diameter of 10cm.	no	0	3.15			1.94	61.5873			1.97	1.91	4.47		0.93			1.9		1.9				0.08	3.6					45	14.5794		14.5794				0.61387	27.6242
ANTARKTIS V/2	First-Year	308	19860805	218	-66.0412	6.2704	52217-6	In his calculations Gerhard Dieckmann considered a diameter of 10cm.	no	0	3.15			2.03	64.4444			2.09	1.97	4.6		0.23			2.8		2.8				0.06	2.4					40	20.8783		20.8783				0.447391	17.8957
ANTARKTIS V/2	First-Year	308	19860805	218	-66.0412	6.2704	52217-6	In his calculations Gerhard Dieckmann considered a diameter of 10cm.	no	0	3.15			2.145	68.0952			2.2	2.09	3		0.31			3.8		3.8				0.05	2.4					48	43.4467		43.4467				0.571667	27.44
ANTARKTIS V/2	First-Year	308	19860805	218	-66.0412	6.2704	52217-6	In his calculations Gerhard Dieckmann considered a diameter of 10cm.	no	0	3.15			2.25	71.4286			2.3	2.2	2.4		0.26			1.7		1.7				0.03	1.9					63.3333	24.2958		24.2958				0.42875	27.1542
ANTARKTIS V/2	First-Year	308	19860805	218	-66.0412	6.2704	52217-6	In his calculations Gerhard Dieckmann considered a diameter of 10cm.	no	0	3.15			2.36	74.9206			2.42	2.3	3.2		0.92			3.6		3.6				0.07	3.3					47.1429	38.5875		38.5875				0.750313	35.3719
ANTARKTIS V/2	First-Year	308	19860805	218	-66.0412	6.2704	52217-6	In his calculations Gerhard Dieckmann considered a diameter of 10cm.	no	0	3.15			2.475	78.5714			2.53	2.42	3.6		0.82			2.6		2.6				0.13	4.3					33.0769	24.7722		24.7722				1.23861	40.9694
ANTARKTIS V/2	First-Year	308	19860805	218	-66.0412	6.2704	52217-6	In his calculations Gerhard Dieckmann considered a diameter of 10cm.	no	0	3.15			2.585	82.0635			2.64	2.53	3.4		0.81			1.6		1.6				0.03	3.3					110	16.1412		16.1412				0.302647	33.2912
ANTARKTIS V/2	First-Year	308	19860805	218	-66.0412	6.2704	52217-6	In his calculations Gerhard Dieckmann considered a diameter of 10cm.	no	0	3.15			2.695	85.5556			2.75	2.64	2.6		0.67			1.8		1.8				0.02	1.1					55	23.7462		23.7462				0.263846	14.5115
ANTARKTIS V/2	First-Year	308	19860805	218	-66.0412	6.2704	52217-6	In his calculations Gerhard Dieckmann considered a diameter of 10cm.	no	0	3.15			2.81	89.2063			2.87	2.75	4.7		1.53			4.8		4.8				0	4						35.0298		35.0298				0	29.1915
ANTARKTIS V/2	First-Year	308	19860805	218	-66.0412	6.2704	52217-6	In his calculations Gerhard Dieckmann considered a diameter of 10cm.	no	0	3.15			2.905	92.2222			2.94	2.87	3		2.13			7.7		7.7				0.35	9.2					26.2857	88.0367		88.0367				4.00167	105.187
ANTARKTIS V/2	First-Year	308	19860805	218	-66.0412	6.2704	52217-6	In his calculations Gerhard Dieckmann considered a diameter of 10cm.	no	0	3.15			2.99	94.9206			3.04	2.94	3.1		2.92			3.6		3.6				0.08	3.5					43.75	39.8323		39.8323				0.885161	38.7258
ANTARKTIS V/2	First-Year	308	19860805	218	-66.0412	6.2704	52217-6	In his calculations Gerhard Dieckmann considered a diameter of 10cm.	no	0	3.15			3.095	98.254			3.15	3.04	4		3.43			4.2		4.2				0.32	5.8					18.125	36.015		36.015				2.744	49.735
ANTARKTIS V/2	First-Year	312	19860806	219	-66.3985	5.0322	52218-1	In his calculations Gerhard Dieckmann considered a diameter of 10cm.	no	1	0.49			0.025	5.10204			0.05	0	30.4		0.13			28.7		28.7				0.85	53.6					63.0588	32.3819		32.3819				0.959046	60.4763
ANTARKTIS V/2	First-Year	312	19860806	219	-66.3985	5.0322	52218-1	In his calculations Gerhard Dieckmann considered a diameter of 10cm.	no	0	0.49			0.065	13.2653			0.08	0.05	13.2		0.05			9.8		9.8				0.12	17.5					145.833	25.4652		25.4652				0.311818	45.4735
ANTARKTIS V/2	First-Year	312	19860806	219	-66.3985	5.0322	52218-1	In his calculations Gerhard Dieckmann considered a diameter of 10cm.	no	0	0.49			0.1	20.4082			0.12	0.08	11		0.06			9.4		9.4				0.23	17.8					77.3913	29.3109		29.3109				0.717182	55.5036
ANTARKTIS V/2	First-Year	312	19860806	219	-66.3985	5.0322	52218-1	In his calculations Gerhard Dieckmann considered a diameter of 10cm.	no	0	0.49			0.16	32.6531			0.2	0.12	9.5		0.05			11.3		11.3				0.12	16					133.333	40.7989		40.7989				0.433263	57.7684
ANTARKTIS V/2	First-Year	312	19860806	219	-66.3985	5.0322	52218-1	In his calculations Gerhard Dieckmann considered a diameter of 10cm.	no	0	0.49			0.25	51.0204			0.3	0.2	7.6		0.15			10.6		10.6				0.26	13.5					51.9231	47.8395		47.8395				1.17342	60.9276
ANTARKTIS V/2	First-Year	312	19860806	219	-66.3985	5.0322	52218-1	In his calculations Gerhard Dieckmann considered a diameter of 10cm.	no	0	0.49			0.35	71.4286			0.4	0.3	5.4		0.18			7.7		7.7				0.07	9.9					141.429	48.9093		48.9093				0.44463	62.8833
ANTARKTIS V/2	First-Year	312	19860806	219	-66.3985	5.0322	52218-1	In his calculations Gerhard Dieckmann considered a diameter of 10cm.	no	0	0.49			0.425	86.7347			0.45	0.4	5.8		0.37			5.3		5.3				0.1	9.5					95	31.3431		31.3431				0.591379	56.181
ANTARKTIS V/2	First-Year	312	19860806	219	-66.3985	5.0322	52218-1	In his calculations Gerhard Dieckmann considered a diameter of 10cm.	no	0	0.49			0.47	95.9184			0.49	0.45	6.6		1.03			7.4		7.4				0.22	13.7					62.2727	38.4576		38.4576				1.14333	71.1985
ANTARKTIS V/2	First-Year	315	19860807	220	-67.6485	2.3905	52219-6	In his calculations Gerhard Dieckmann considered a diameter of 10cm.	no	1	4.29			0.05	1.1655			0.1	0	0.09		0.01			6.3		6.3				0.01	0					0	2401		2401				3.81111	0
ANTARKTIS V/2	First-Year	315	19860807	220	-67.6485	2.3905	52219-6	In his calculations Gerhard Dieckmann considered a diameter of 10cm.	no	0	4.29			0.15	3.4965			0.2	0.1	0.09		0.05			2.8		2.8				0.01	0					0	1067.11		1067.11				3.81111	0
ANTARKTIS V/2	First-Year	315	19860807	220	-67.6485	2.3905	52219-6	In his calculations Gerhard Dieckmann considered a diameter of 10cm.	no	0	4.29			0.255	5.94406			0.31	0.2	0.09		0.02			5.4		5.4				0	0						2058		2058				0	0
ANTARKTIS V/2	First-Year	315	19860807	220	-67.6485	2.3905	52219-6	In his calculations Gerhard Dieckmann considered a diameter of 10cm.	no	0	4.29			0.375	8.74126			0.44	0.31	0.09		0.07			7.9		7.9				0	0						3010.78		3010.78				0	0
ANTARKTIS V/2	First-Year	315	19860807	220	-67.6485	2.3905	52219-6	In his calculations Gerhard Dieckmann considered a diameter of 10cm.	no	0	4.29			0.505	11.7716			0.57	0.44	0.09		0.14			4.7		4.7				0	0						1791.22		1791.22				0	0
ANTARKTIS V/2	First-Year	315	19860807	220	-67.6485	2.3905	52219-6	In his calculations Gerhard Dieckmann considered a diameter of 10cm.	no	0	4.29			0.635	14.8019			0.7	0.57	0.27		0.13			7.7		7.7				0	0						978.185		978.185				0	0
ANTARKTIS V/2	First-Year	315	19860807	220	-67.6485	2.3905	52219-6	In his calculations Gerhard Dieckmann considered a diameter of 10cm.	no	0	4.29			0.77	17.9487			0.84	0.7	0.63		0.06			18.5		18.5				0.02	0					0	1007.22		1007.22				1.08889	0
ANTARKTIS V/2	First-Year	315	19860807	220	-67.6485	2.3905	52219-6	In his calculations Gerhard Dieckmann considered a diameter of 10cm.	no	0	4.29			0.905	21.0956			0.97	0.84	0.54		0.06			10.6		10.6				0.02	0					0	673.296		673.296				1.27037	0
ANTARKTIS V/2	First-Year	315	19860807	220	-67.6485	2.3905	52219-6	In his calculations Gerhard Dieckmann considered a diameter of 10cm.	no	0	4.29			1.03	24.0093			1.09	0.97	1.36		0.3			2.4		2.4				0.02	0.5					25	60.5294		60.5294				0.504412	12.6103
ANTARKTIS V/2	First-Year	315	19860807	220	-67.6485	2.3905	52219-6	In his calculations Gerhard Dieckmann considered a diameter of 10cm.	no	0	4.29			1.155	26.9231			1.22	1.09	1.46		0.28			1.4		1.4				0.02	0.2					10	32.8904		32.8904				0.469863	4.69863
ANTARKTIS V/2	First-Year	315	19860807	220	-67.6485	2.3905	52219-6	In his calculations Gerhard Dieckmann considered a diameter of 10cm.	no	0	4.29			1.285	29.9534			1.35	1.22	1.64		0.13			1.8		1.8				0.04	0.7					17.5	37.6463		37.6463				0.836585	14.6402
ANTARKTIS V/2	First-Year	315	19860807	220	-67.6485	2.3905	52219-6	In his calculations Gerhard Dieckmann considered a diameter of 10cm.	no	0	4.29			1.3875	32.3427			1.425	1.35	2.31		1.14			2		2				0.04	2					50	29.697		29.697				0.593939	29.697
ANTARKTIS V/2	First-Year	315	19860807	220	-67.6485	2.3905	52219-6	In his calculations Gerhard Dieckmann considered a diameter of 10cm.	no	0	4.29			1.4775	34.4406			1.53	1.425	8		0.02			3		3				0.1	2.6					26	12.8625		12.8625				0.42875	11.1475
ANTARKTIS V/2	First-Year	315	19860807	220	-67.6485	2.3905	52219-6	In his calculations Gerhard Dieckmann considered a diameter of 10cm.	no	0	4.29			1.58	36.8298			1.63	1.53	2.21		0.31			0.1		0.1				0.01	0					0	1.55204		1.55204				0.155204	0
ANTARKTIS V/2	First-Year	315	19860807	220	-67.6485	2.3905	52219-6	In his calculations Gerhard Dieckmann considered a diameter of 10cm.	no	0	4.29			1.68	39.1608			1.73	1.63	3.47		0.39			4.6		4.6				0.08	4.7					58.75	45.4697		45.4697				0.790778	46.4582
ANTARKTIS V/2	First-Year	315	19860807	220	-67.6485	2.3905	52219-6	In his calculations Gerhard Dieckmann considered a diameter of 10cm.	no	0	4.29			1.775	41.3753			1.82	1.73	4.17		0.55			5.8		5.8				0.1	6.2					62	47.7074		47.7074				0.822542	50.9976
ANTARKTIS V/2	First-Year	315	19860807	220	-67.6485	2.3905	52219-6	In his calculations Gerhard Dieckmann considered a diameter of 10cm.	no	0	4.29			1.8675	43.5315			1.915	1.82	2		0.78			4		4				0.04	2.9					72.5	68.6		68.6				0.686	49.735
ANTARKTIS V/2	First-Year	315	19860807	220	-67.6485	2.3905	52219-6	In his calculations Gerhard Dieckmann considered a diameter of 10cm.	no	0	4.29			1.96	45.6876			2.005	1.915	3.37		1.18			19.7		19.7				0.04	3.7					92.5	200.507		200.507				0.407122	37.6588
ANTARKTIS V/2	First-Year	315	19860807	220	-67.6485	2.3905	52219-6	In his calculations Gerhard Dieckmann considered a diameter of 10cm.	no	0	4.29			2.045	47.669			2.085	2.005	3.97		0.55			19		19				0.05	4.9					98	164.156		164.156				0.43199	42.335
ANTARKTIS V/2	First-Year	315	19860807	220	-67.6485	2.3905	52219-6	In his calculations Gerhard Dieckmann considered a diameter of 10cm.	no	0	4.29			2.1375	49.8252			2.19	2.085	4.68		0.28			12.8		12.8				0.05	4.6					92	93.812		93.812				0.366453	33.7137
ANTARKTIS V/2	First-Year	315	19860807	220	-67.6485	2.3905	52219-6	In his calculations Gerhard Dieckmann considered a diameter of 10cm.	no	0	4.29			2.2375	52.1562			2.285	2.19	5.4		0.34			9.2		9.2				0.02	3.7					185	58.437		58.437				0.127037	23.5019
ANTARKTIS V/2	First-Year	315	19860807	220	-67.6485	2.3905	52219-6	In his calculations Gerhard Dieckmann considered a diameter of 10cm.	no	0	4.29			2.335	54.4289			2.385	2.285	4.68		0.5			24.3		24.3				0.08	4.6					57.5	178.096		178.096				0.586325	33.7137
ANTARKTIS V/2	First-Year	315	19860807	220	-67.6485	2.3905	52219-6	In his calculations Gerhard Dieckmann considered a diameter of 10cm.	no	0	4.29			2.435	56.7599			2.485	2.385	3.37		0.95			12.7		12.7				0.2	6.1					30.5	129.261		129.261				2.03561	62.0861
ANTARKTIS V/2	First-Year	315	19860807	220	-67.6485	2.3905	52219-6	In his calculations Gerhard Dieckmann considered a diameter of 10cm.	no	0	4.29			2.5525	59.4988			2.62	2.485	3.27		1.17			16.7		16.7				0.05	4					80	175.171		175.171				0.524465	41.9572
ANTARKTIS V/2	First-Year	315	19860807	220	-67.6485	2.3905	52219-6	In his calculations Gerhard Dieckmann considered a diameter of 10cm.	no	0	4.29			2.69	62.704			2.76	2.62	3.18		1.9			36.2		36.2				0.08	4.2					52.5	390.459		390.459				0.862893	45.3019
ANTARKTIS V/2	First-Year	315	19860807	220	-67.6485	2.3905	52219-6	In his calculations Gerhard Dieckmann considered a diameter of 10cm.	no	0	4.29			2.81	65.5012			2.86	2.76	3.7		1.38			4.7		4.7				0.25	5.9					23.6	43.5703		43.5703				2.31757	54.6946
ANTARKTIS V/2	First-Year	315	19860807	220	-67.6485	2.3905	52219-6	In his calculations Gerhard Dieckmann considered a diameter of 10cm.	no	0	4.29			2.9125	67.8904			2.965	2.86	3.2		1.84			3.3		3.3				0.22	3.3					15	35.3719		35.3719				2.35812	35.3719
ANTARKTIS V/2	First-Year	315	19860807	220	-67.6485	2.3905	52219-6	In his calculations Gerhard Dieckmann considered a diameter of 10cm.	no	0	4.29			3.015	70.2797			3.065	2.965	2.7		0.53			2.9		2.9				0.11	2.6					23.6364	36.8407		36.8407				1.39741	33.0296
ANTARKTIS V/2	First-Year	315	19860807	220	-67.6485	2.3905	52219-6	In his calculations Gerhard Dieckmann considered a diameter of 10cm.	no	0	4.29			3.115	72.6107			3.165	3.065	2.3		0.28			2.3		2.3				0.09	1.6					17.7778	34.3		34.3				1.34217	23.8609
ANTARKTIS V/2	First-Year	315	19860807	220	-67.6485	2.3905	52219-6	In his calculations Gerhard Dieckmann considered a diameter of 10cm.	no	0	4.29			3.215	74.9417			3.265	3.165	2		0.18			2.7		2.7				0.11	2					18.1818	46.305		46.305				1.8865	34.3
ANTARKTIS V/2	First-Year	315	19860807	220	-67.6485	2.3905	52219-6	In his calculations Gerhard Dieckmann considered a diameter of 10cm.	no	0	4.29			3.31	77.1562			3.355	3.265	2.4		0.33			3.4		3.4				0.11	2.4					21.8182	48.5917		48.5917				1.57208	34.3
ANTARKTIS V/2	First-Year	315	19860807	220	-67.6485	2.3905	52219-6	In his calculations Gerhard Dieckmann considered a diameter of 10cm.	no	0	4.29			3.41	79.4872			3.465	3.355	2.7		0.8			3.6		3.6				0.12	2.6					21.6667	45.7333		45.7333				1.52444	33.0296
ANTARKTIS V/2	First-Year	315	19860807	220	-67.6485	2.3905	52219-6	In his calculations Gerhard Dieckmann considered a diameter of 10cm.	no	0	4.29			3.515	81.9347			3.565	3.465	1.8		0.27			3.4		3.4				0.1	2.1					21	64.7889		64.7889				1.90556	40.0167
ANTARKTIS V/2	First-Year	315	19860807	220	-67.6485	2.3905	52219-6	In his calculations Gerhard Dieckmann considered a diameter of 10cm.	no	0	4.29			3.615	84.2657			3.665	3.565	3.1		0.12			4.1		4.1				0.01	3.2					320	45.3645		45.3645				0.110645	35.4065
ANTARKTIS V/2	First-Year	315	19860807	220	-67.6485	2.3905	52219-6	In his calculations Gerhard Dieckmann considered a diameter of 10cm.	no	0	4.29			3.72	86.7133			3.775	3.665	3		0.08			0		0				0	0						0		0				0	0
ANTARKTIS V/2	First-Year	315	19860807	220	-67.6485	2.3905	52219-6	In his calculations Gerhard Dieckmann considered a diameter of 10cm.	no	0	4.29			3.835	89.3939			3.895	3.775	2.8		0.13			5.6		5.6				0.11	2.3					20.9091	68.6		68.6				1.3475	28.175
ANTARKTIS V/2	First-Year	315	19860807	220	-67.6485	2.3905	52219-6	In his calculations Gerhard Dieckmann considered a diameter of 10cm.	no	0	4.29			3.9575	92.2494			4.02	3.895	2.9		0.26			0		0				0	0						0		0				0	0
ANTARKTIS V/2	First-Year	315	19860807	220	-67.6485	2.3905	52219-6	In his calculations Gerhard Dieckmann considered a diameter of 10cm.	no	0	4.29			4.075	94.9883			4.13	4.02	2.6		0.43			8.2		8.2				0.18	2.2					12.2222	108.177		108.177				2.37462	29.0231
ANTARKTIS V/2	First-Year	315	19860807	220	-67.6485	2.3905	52219-6	In his calculations Gerhard Dieckmann considered a diameter of 10cm.	no	0	4.29			4.1775	97.3776			4.225	4.13	2.6		0.8			0		0				0	0						0		0				0	0
ANTARKTIS V/2	First-Year	315	19860807	220	-67.6485	2.3905	52219-6	In his calculations Gerhard Dieckmann considered a diameter of 10cm.	no	0	4.29			4.2575	99.2424			4.29	4.225	3.3		0.39			3		3				0.1	1.3					13	31.1818		31.1818				1.03939	13.5121
ANTARKTIS V/2	First-Year	317	19860809	222	-68.3544	0.4845	52221-1	In his calculations Gerhard Dieckmann considered a diameter of 10cm.	no	1	0.625			0.025	4			0.04	0.01	9.3		0.08			5.8		5.8				0	7.2						21.3914		21.3914				0	26.5548
ANTARKTIS V/2	First-Year	317	19860809	222	-68.3544	0.4845	52221-1	In his calculations Gerhard Dieckmann considered a diameter of 10cm.	no	0	0.625			0.055	8.8			0.07	0.04	9.8		0.1			6.8		6.8				0	7.5						23.8		23.8				0	26.25
ANTARKTIS V/2	First-Year	317	19860809	222	-68.3544	0.4845	52221-1	In his calculations Gerhard Dieckmann considered a diameter of 10cm.	no	0	0.625			0.0825	13.2			0.095	0.07	8.4		0.12			9.8		9.8				0	10.4						40.0167		40.0167				0	42.4667
ANTARKTIS V/2	First-Year	317	19860809	222	-68.3544	0.4845	52221-1	In his calculations Gerhard Dieckmann considered a diameter of 10cm.	no	0	0.625			0.115	18.4			0.135	0.095	10.1		0.11			7.4		7.4				0.43	8.9					20.6977	25.1307		25.1307				1.4603	30.2248
ANTARKTIS V/2	First-Year	317	19860809	222	-68.3544	0.4845	52221-1	In his calculations Gerhard Dieckmann considered a diameter of 10cm.	no	0	0.625			0.1675	26.8			0.2	0.135	8		0.07			8		8				0.44	8.1					18.4091	34.3		34.3				1.8865	34.7287
ANTARKTIS V/2	First-Year	317	19860809	222	-68.3544	0.4845	52221-1	In his calculations Gerhard Dieckmann considered a diameter of 10cm.	no	0	0.625			0.215	34.4			0.23	0.2	5.1		0.08			4.2		4.2				0.2	5					25	28.2471		28.2471				1.3451	33.6275
ANTARKTIS V/2	First-Year	317	19860809	222	-68.3544	0.4845	52221-1	In his calculations Gerhard Dieckmann considered a diameter of 10cm.	no	0	0.625			0.265	42.4			0.3	0.23	5.2		0.12			2.7		2.7				0.18	2.9					16.1111	17.8096		17.8096				1.18731	19.1288
ANTARKTIS V/2	First-Year	317	19860809	222	-68.3544	0.4845	52221-1	In his calculations Gerhard Dieckmann considered a diameter of 10cm.	no	0	0.625			0.32	51.2			0.34	0.3	4.4		0.12			4.6		4.6				0.24	4.3					17.9167	35.8591		35.8591				1.87091	33.5205
ANTARKTIS V/2	First-Year	317	19860809	222	-68.3544	0.4845	52221-1	In his calculations Gerhard Dieckmann considered a diameter of 10cm.	no	0	0.625			0.355	56.8			0.37	0.34	4.2		0.17			3.9		3.9				0.16	4.1					25.625	31.85		31.85				1.30667	33.4833
ANTARKTIS V/2	First-Year	317	19860809	222	-68.3544	0.4845	52221-1	In his calculations Gerhard Dieckmann considered a diameter of 10cm.	no	0	0.625			0.39	62.4			0.41	0.37	4		0.48			4		4				0.2	4					20	34.3		34.3				1.715	34.3
ANTARKTIS V/2	First-Year	317	19860809	222	-68.3544	0.4845	52221-1	In his calculations Gerhard Dieckmann considered a diameter of 10cm.	no	0	0.625			0.465	74.4			0.52	0.41	4.2		0.26			4.2		4.2				0.18	4.3					23.8889	34.3		34.3				1.47	35.1167
ANTARKTIS V/2	First-Year	317	19860809	222	-68.3544	0.4845	52221-1	In his calculations Gerhard Dieckmann considered a diameter of 10cm.	no	0	0.625			0.5575	89.2			0.595	0.52	3.7		0.55			4.1		4.1				0.15	4.1					27.3333	38.0081		38.0081				1.39054	38.0081
ANTARKTIS V/2	First-Year	317	19860809	222	-68.3544	0.4845	52221-1	In his calculations Gerhard Dieckmann considered a diameter of 10cm.	no	0	0.625			0.61	97.6			0.625	0.595	6.6		0.12			4.1		4.1				0.15	4.1					27.3333	21.3076		21.3076				0.779545	21.3076
ANTARKTIS V/2	First-Year	317	19860812	225	-68.4738	0.4294	52224-1	In his calculations Gerhard Dieckmann considered a diameter of 10cm.	no	1	0.38			0.0625	16.4474			0.125	0	7.9		0.13			4.3		4.3				0.23	5.8					25.2174	18.6696		18.6696				0.998608	25.1823
ANTARKTIS V/2	First-Year	317	19860812	225	-68.4738	0.4294	52224-1	In his calculations Gerhard Dieckmann considered a diameter of 10cm.	no	0	0.38			0.1875	49.3421			0.25	0.125	5.8		0.19			3		3				0.17	4.9					28.8235	17.7414		17.7414				1.00534	28.9776
ANTARKTIS V/2	First-Year	317	19860812	225	-68.4738	0.4294	52224-1	In his calculations Gerhard Dieckmann considered a diameter of 10cm.	no	0	0.38			0.295	77.6316			0.34	0.25	4.1		0.3			4.7		4.7				0.2	7					35	39.3195		39.3195				1.67317	58.561
ANTARKTIS V/2	First-Year	317	19860812	225	-68.4738	0.4294	52224-1	In his calculations Gerhard Dieckmann considered a diameter of 10cm.	no	0	0.38			0.36	94.7368			0.38	0.34	5		1.05			6.6		6.6				0.37	8.6					23.2432	45.276		45.276				2.5382	58.996
ANTARKTIS V/2	First-Year	317	19860813	226	-68.5504	0.1208	52225-1	In his calculations Gerhard Dieckmann considered a diameter of 10cm.	no	1	0.86			0.03	3.48837			0.06	0	10.2		0.02			11.6		11.6				0.85	17.5					20.5882	39.0078		39.0078				2.85833	58.848
ANTARKTIS V/2	First-Year	317	19860813	226	-68.5504	0.1208	52225-1	In his calculations Gerhard Dieckmann considered a diameter of 10cm.	no	0	0.86			0.095	11.0465			0.13	0.06	7.7		0.02			7.6		7.6				0.37	11.4					30.8108	33.8545		33.8545				1.64818	50.7818
ANTARKTIS V/2	First-Year	317	19860813	226	-68.5504	0.1208	52225-1	In his calculations Gerhard Dieckmann considered a diameter of 10cm.	no	0	0.86			0.1725	20.0581			0.215	0.13	6.5		0.03			7.2		7.2				0.36	10.6					29.4444	37.9938		37.9938				1.89969	55.9354
ANTARKTIS V/2	First-Year	317	19860813	226	-68.5504	0.1208	52225-1	In his calculations Gerhard Dieckmann considered a diameter of 10cm.	no	0	0.86			0.2375	27.6163			0.26	0.215	11.7		0.04			10.9		10.9				0.99	19.2					19.3939	31.9547		31.9547				2.90231	56.2872
ANTARKTIS V/2	First-Year	317	19860813	226	-68.5504	0.1208	52225-1	In his calculations Gerhard Dieckmann considered a diameter of 10cm.	no	0	0.86			0.28	32.5581			0.3	0.26	7.4		0.04			9		9				0.32	11.5					35.9375	41.7162		41.7162				1.48324	53.3041
ANTARKTIS V/2	First-Year	317	19860813	226	-68.5504	0.1208	52225-1	In his calculations Gerhard Dieckmann considered a diameter of 10cm.	no	0	0.86			0.35	40.6977			0.4	0.3	6.2		0.07			7.2		7.2				0.26	10.3					39.6154	39.8323		39.8323				1.43839	56.9823
ANTARKTIS V/2	First-Year	317	19860813	226	-68.5504	0.1208	52225-1	In his calculations Gerhard Dieckmann considered a diameter of 10cm.	no	0	0.86			0.4375	50.8721			0.475	0.4	7.4		0.13			2.3		2.3				0.14	3.8					27.1429	10.6608		10.6608				0.648919	17.6135
ANTARKTIS V/2	First-Year	317	19860813	226	-68.5504	0.1208	52225-1	In his calculations Gerhard Dieckmann considered a diameter of 10cm.	no	0	0.86			0.5225	60.7558			0.57	0.475	4.7		0.16			6.2		6.2				0.2	8.6					43	45.2468		45.2468				1.45957	62.7617
ANTARKTIS V/2	First-Year	317	19860813	226	-68.5504	0.1208	52225-1	In his calculations Gerhard Dieckmann considered a diameter of 10cm.	no	0	0.86			0.615	71.5116			0.66	0.57	4.7		0.22			6.7		6.7				0.22	7.8					35.4545	48.8957		48.8957				1.60553	56.9234
ANTARKTIS V/2	First-Year	317	19860813	226	-68.5504	0.1208	52225-1	In his calculations Gerhard Dieckmann considered a diameter of 10cm.	no	0	0.86			0.705	81.9767			0.75	0.66	4.2		0.2			5		5				0.17	6.8					40	40.8333		40.8333				1.38833	55.5333
ANTARKTIS V/2	First-Year	317	19860813	226	-68.5504	0.1208	52225-1	In his calculations Gerhard Dieckmann considered a diameter of 10cm.	no	0	0.86			0.78	90.6977			0.81	0.75	4.5		0.3			3.1		3.1				0.25	5.8					23.2	23.6289		23.6289				1.90556	44.2089
ANTARKTIS V/2	First-Year	317	19860813	226	-68.5504	0.1208	52225-1	In his calculations Gerhard Dieckmann considered a diameter of 10cm.	no	0	0.86			0.835	97.093			0.86	0.81	7.2		0.38			10.4		10.4				0.43	13.8					32.093	49.5444		49.5444				2.04847	65.7417
ANTARKTIS V/2	First-Year	319	19860814	227	-69.2075	-0.0817	52226-1	In his calculations Gerhard Dieckmann considered a diameter of 10cm.	no	1	0.525			0.015	2.85714			0.03	0	21.2		0.28			14.7		14.7				0.69	15.8					22.8986	23.7835		23.7835				1.11637	25.5632
ANTARKTIS V/2	First-Year	319	19860814	227	-69.2075	-0.0817	52226-1	In his calculations Gerhard Dieckmann considered a diameter of 10cm.	no	0	0.525			0.065	12.381			0.1	0.03	9.4		0.11			8.1		8.1				0.38	8.8					23.1579	29.5564		29.5564				1.3866	32.1106
ANTARKTIS V/2	First-Year	319	19860814	227	-69.2075	-0.0817	52226-1	In his calculations Gerhard Dieckmann considered a diameter of 10cm.	no	0	0.525			0.115	21.9048			0.13	0.1	5.4		0.26			5.8		5.8				0.15	5.5					36.6667	36.8407		36.8407				0.952778	34.9352
ANTARKTIS V/2	First-Year	319	19860814	227	-69.2075	-0.0817	52226-1	In his calculations Gerhard Dieckmann considered a diameter of 10cm.	no	0	0.525			0.165	31.4286			0.2	0.13	6.8		0.14			7.4		7.4				0.34	9.4					27.6471	37.3265		37.3265				1.715	47.4147
ANTARKTIS V/2	First-Year	319	19860814	227	-69.2075	-0.0817	52226-1	In his calculations Gerhard Dieckmann considered a diameter of 10cm.	no	0	0.525			0.255	48.5714			0.31	0.2	0.63		0.12			5.3		5.3				0.21	7.2					34.2857	288.556		288.556				11.4333	392
ANTARKTIS V/2	First-Year	319	19860814	227	-69.2075	-0.0817	52226-1	In his calculations Gerhard Dieckmann considered a diameter of 10cm.	no	0	0.525			0.365	69.5238			0.42	0.31	5.4		0.17			5.6		5.6				0.25	6.9					27.6	35.5704		35.5704				1.58796	43.8278
ANTARKTIS V/2	First-Year	319	19860814	227	-69.2075	-0.0817	52226-1	In his calculations Gerhard Dieckmann considered a diameter of 10cm.	no	0	0.525			0.4725	90			0.525	0.42	4.9		0.63			5.1		5.1				0.26	6.9					26.5385	35.7		35.7				1.82	48.3
ANTARKTIS V/2	First-Year	321	19860816	229	-69.1869	-1.1608	52228-1	In his calculations Gerhard Dieckmann considered a diameter of 10cm.	no	1	0.9			0.03	3.33333			0.06	0	14.3		0.52			8.5		8.5				0.23	13.3					57.8261	20.3881		20.3881				0.551678	31.9014
ANTARKTIS V/2	First-Year	321	19860816	229	-69.1869	-1.1608	52228-1	In his calculations Gerhard Dieckmann considered a diameter of 10cm.	no	0	0.9			0.08	8.88889			0.1	0.06	10.5		0.91			7.5		7.5				0.28	12.7					45.3571	24.5		24.5				0.914667	41.4867
ANTARKTIS V/2	First-Year	321	19860816	229	-69.1869	-1.1608	52228-1	In his calculations Gerhard Dieckmann considered a diameter of 10cm.	no	0	0.9			0.15	16.6667			0.2	0.1	3.8		0.45			2		2				0.11	4					36.3636	18.0526		18.0526				0.992895	36.1053
ANTARKTIS V/2	First-Year	321	19860816	229	-69.1869	-1.1608	52228-1	In his calculations Gerhard Dieckmann considered a diameter of 10cm.	no	0	0.9			0.25	27.7778			0.3	0.2	4.6		0.54			2.7		2.7				0.12	4.1					34.1667	20.1326		20.1326				0.894783	30.5717
ANTARKTIS V/2	First-Year	321	19860816	229	-69.1869	-1.1608	52228-1	In his calculations Gerhard Dieckmann considered a diameter of 10cm.	no	0	0.9			0.35	38.8889			0.4	0.3	4.9		1.6			5.2		5.2				0.29	7.6					26.2069	36.4		36.4				2.03	53.2
ANTARKTIS V/2	First-Year	321	19860816	229	-69.1869	-1.1608	52228-1	In his calculations Gerhard Dieckmann considered a diameter of 10cm.	no	0	0.9			0.455	50.5556			0.51	0.4	3.5		1.8			2.6		2.6				0.2	4					20	25.48		25.48				1.96	39.2
ANTARKTIS V/2	First-Year	321	19860816	229	-69.1869	-1.1608	52228-1	In his calculations Gerhard Dieckmann considered a diameter of 10cm.	no	0	0.9			0.565	62.7778			0.62	0.51	4.3		1.4			3.8		3.8				0.17	5.6					32.9412	30.3116		30.3116				1.35605	44.6698
ANTARKTIS V/2	First-Year	321	19860816	229	-69.1869	-1.1608	52228-1	In his calculations Gerhard Dieckmann considered a diameter of 10cm.	no	0	0.9			0.6725	74.7222			0.725	0.62	3.6		0.55			3.1		3.1				0.17	4.3					25.2941	29.5361		29.5361				1.61972	40.9694
ANTARKTIS V/2	First-Year	321	19860816	229	-69.1869	-1.1608	52228-1	In his calculations Gerhard Dieckmann considered a diameter of 10cm.	no	0	0.9			0.78	86.6667			0.835	0.725	2.4		1.18			3		3				0.11	3.8					34.5455	42.875		42.875				1.57208	54.3083
ANTARKTIS V/2	First-Year	321	19860816	229	-69.1869	-1.1608	52228-1	In his calculations Gerhard Dieckmann considered a diameter of 10cm.	no	0	0.9			0.8675	96.3889			0.9	0.835	2.4		0.28			1.1		1.1				0.11	3.8					34.5455	15.7208		15.7208				1.57208	54.3083
ANTARKTIS V/2	Young-Ice	325-326	19860819	232	-68.3812	-3.4236	52231-1	In his calculations Gerhard Dieckmann considered a diameter of 10cm. Uncertainty about the station number.	no	1	0.29			0.015	5.17241			0.03	0	19.2		0.11			15.3		15.3				0.14	18					128.571	27.3328		27.3328				0.250104	32.1562
ANTARKTIS V/2	Young-Ice	325-326	19860819	232	-68.3812	-3.4236	52231-1	In his calculations Gerhard Dieckmann considered a diameter of 10cm. Uncertainty about the station number.	no	0	0.29			0.0425	14.6552			0.055	0.03	10.9		0.05			7.1		7.1				0.05	9.4					188	22.3422		22.3422				0.157339	29.5798
ANTARKTIS V/2	Young-Ice	325-326	19860819	232	-68.3812	-3.4236	52231-1	In his calculations Gerhard Dieckmann considered a diameter of 10cm. Uncertainty about the station number.	no	0	0.29			0.075	25.8621			0.1	0.05	9.3		0.05			7.1		7.1				0.06	9.9					165	26.186		26.186				0.22129	36.5129
ANTARKTIS V/2	Young-Ice	325-326	19860819	232	-68.3812	-3.4236	52231-1	In his calculations Gerhard Dieckmann considered a diameter of 10cm. Uncertainty about the station number.	no	0	0.29			0.15	51.7241			0.2	0.1	5.2		0.08			6		6				0.03	5.8					193.333	39.5769		39.5769				0.197885	38.2577
ANTARKTIS V/2	Young-Ice	325-326	19860819	232	-68.3812	-3.4236	52231-1	In his calculations Gerhard Dieckmann considered a diameter of 10cm. Uncertainty about the station number.	no	0	0.29			0.245	84.4828			0.29	0.2	4.4		0.37			5.1		5.1				0.08	6					75	39.7568		39.7568				0.623636	46.7727
ANTARKTIS V/2	First-Year	325-326	19860819	232	-68.3812	-3.4236	52231-6	In his calculations Gerhard Dieckmann considered a diameter of 10cm. Uncertainty about the station number.	no	1	1.11			0.03	2.7027			0.06	0	8.2		1.32			15.5		15.5				0.17	11.8					69.4118	64.8354		64.8354				0.711098	49.3585
ANTARKTIS V/2	First-Year	325-326	19860819	232	-68.3812	-3.4236	52231-6	In his calculations Gerhard Dieckmann considered a diameter of 10cm. Uncertainty about the station number.	no	0	1.11			0.095	8.55856			0.13	0.06	8.6		1.58			8.7		8.7				0.16	10.9					68.125	34.6988		34.6988				0.63814	43.4733
ANTARKTIS V/2	First-Year	325-326	19860819	232	-68.3812	-3.4236	52231-6	In his calculations Gerhard Dieckmann considered a diameter of 10cm. Uncertainty about the station number.	no	0	1.11			0.19	17.1171			0.25	0.13	8.2		3.63			10.5		10.5				0.26	9.8					37.6923	43.9207		43.9207				1.08756	40.9927
ANTARKTIS V/2	First-Year	325-326	19860819	232	-68.3812	-3.4236	52231-6	In his calculations Gerhard Dieckmann considered a diameter of 10cm. Uncertainty about the station number.	no	0	1.11			0.3	27.027			0.35	0.25	4.6		7.17			9.6		9.6				0.33	5.7					17.2727	71.5826		71.5826				2.46065	42.5022
ANTARKTIS V/2	First-Year	325-326	19860819	232	-68.3812	-3.4236	52231-6	In his calculations Gerhard Dieckmann considered a diameter of 10cm. Uncertainty about the station number.	no	0	1.11			0.375	33.7838			0.4	0.35	2.8		9.6			3.7		3.7				0.16	0.7					4.375	45.325		45.325				1.96	8.575
ANTARKTIS V/2	First-Year	325-326	19860819	232	-68.3812	-3.4236	52231-6	In his calculations Gerhard Dieckmann considered a diameter of 10cm. Uncertainty about the station number.	no	0	1.11			0.425	38.2883			0.45	0.4	2.3		12.98			5.3		5.3				0.1	0.9					9	79.0391		79.0391				1.4913	13.4217
ANTARKTIS V/2	First-Year	325-326	19860819	232	-68.3812	-3.4236	52231-6	In his calculations Gerhard Dieckmann considered a diameter of 10cm. Uncertainty about the station number.	no	0	1.11			0.5	45.045			0.55	0.45	2.4		10.71			2.3		2.3				0.04	1.5					37.5	32.8708		32.8708				0.571667	21.4375
ANTARKTIS V/2	First-Year	325-326	19860819	232	-68.3812	-3.4236	52231-6	In his calculations Gerhard Dieckmann considered a diameter of 10cm. Uncertainty about the station number.	no	0	1.11			0.5725	51.5766			0.595	0.55	1.9		3.22			2.5		2.5				0.1	2.1					21	45.1316		45.1316				1.80526	37.9105
ANTARKTIS V/2	First-Year	325-326	19860819	232	-68.3812	-3.4236	52231-6	In his calculations Gerhard Dieckmann considered a diameter of 10cm. Uncertainty about the station number.	no	0	1.11			0.62	55.8559			0.645	0.595	2.6		3.94			2.9		2.9				0.14	2.9					20.7143	38.2577		38.2577				1.84692	38.2577
ANTARKTIS V/2	First-Year	325-326	19860819	232	-68.3812	-3.4236	52231-6	In his calculations Gerhard Dieckmann considered a diameter of 10cm. Uncertainty about the station number.	no	0	1.11			0.6975	62.8378			0.75	0.645	6.7		0.25			8.2		8.2				0.18	8.6					47.7778	41.9791		41.9791				0.921493	44.0269
ANTARKTIS V/2	First-Year	325-326	19860819	232	-68.3812	-3.4236	52231-6	In his calculations Gerhard Dieckmann considered a diameter of 10cm. Uncertainty about the station number.	no	0	1.11			0.955	86.036			1.01	0.9	5.3		0.28			7.6		7.6				0.14	7.7					55	49.1849		49.1849				0.906038	49.8321
ANTARKTIS V/2	First-Year	325-326	19860819	232	-68.3812	-3.4236	52231-6	In his calculations Gerhard Dieckmann considered a diameter of 10cm. Uncertainty about the station number.	no	0	1.11			1.06	95.4955			1.11	1.01	4.4		0.29			8.6		8.6				0.1	6.9					69	67.0409		67.0409				0.779545	53.7886
ANTARKTIS V/2	First-Year	327-328	19860820	233	-67.3963	-1.5953	52232-1	In his calculations Gerhard Dieckmann considered a diameter of 10cm. Uncertainty about the station number.	no	1	1.01			0.03	2.9703			0.06	0	1.4		0.06			1.6		1.6				0	1						39.2		39.2				0	24.5
ANTARKTIS V/2	First-Year	327-328	19860820	233	-67.3963	-1.5953	52232-1	In his calculations Gerhard Dieckmann considered a diameter of 10cm. Uncertainty about the station number.	no	0	1.01			0.08	7.92079			0.1	0.06	3		0.13			2.8		2.8				0.03	3.4					113.333	32.0133		32.0133				0.343	38.8733
ANTARKTIS V/2	First-Year	327-328	19860820	233	-67.3963	-1.5953	52232-1	In his calculations Gerhard Dieckmann considered a diameter of 10cm. Uncertainty about the station number.	no	0	1.01			0.1525	15.099			0.205	0.1	2.6		0.06			3.3		3.3				0.01	3.2					320	43.5346		43.5346				0.131923	42.2154
ANTARKTIS V/2	First-Year	327-328	19860820	233	-67.3963	-1.5953	52232-1	In his calculations Gerhard Dieckmann considered a diameter of 10cm. Uncertainty about the station number.	no	0	1.01			0.22	21.7822			0.235	0.205	7.5		0.88			4.8		4.8				0.12	10.7					89.1667	21.952		21.952				0.5488	48.9347
ANTARKTIS V/2	First-Year	327-328	19860820	233	-67.3963	-1.5953	52232-1	In his calculations Gerhard Dieckmann considered a diameter of 10cm. Uncertainty about the station number.	no	0	1.01			0.27	26.7327			0.305	0.235	1.9		3.93			1.5		1.5				0.05	0.9					18	27.0789		27.0789				0.902632	16.2474
ANTARKTIS V/2	First-Year	327-328	19860820	233	-67.3963	-1.5953	52232-1	In his calculations Gerhard Dieckmann considered a diameter of 10cm. Uncertainty about the station number.	no	0	1.01			0.355	35.1485			0.405	0.305	8.2		3.51			3.5		3.5				0.26	10.4					40	14.6402		14.6402				1.08756	43.5024
ANTARKTIS V/2	First-Year	327-328	19860820	233	-67.3963	-1.5953	52232-1	In his calculations Gerhard Dieckmann considered a diameter of 10cm. Uncertainty about the station number.	no	0	1.01			0.4175	41.3366			0.43	0.405	5.2		6.44			1.1		1.1				0.08	4.8					60	7.25577		7.25577				0.527692	31.6615
ANTARKTIS V/2	First-Year	327-328	19860820	233	-67.3963	-1.5953	52232-1	In his calculations Gerhard Dieckmann considered a diameter of 10cm. Uncertainty about the station number.	no	0	1.01			0.4525	44.802			0.475	0.43	10		12.84			1.5		1.5				0.15	13.1					87.3333	5.145		5.145				0.5145	44.933
ANTARKTIS V/2	First-Year	327-328	19860820	233	-67.3963	-1.5953	52232-1	In his calculations Gerhard Dieckmann considered a diameter of 10cm. Uncertainty about the station number.	no	0	1.01			0.495	49.0099			0.515	0.475	9.8		11.28			2.3		2.3				0.08	11.2					140	8.05		8.05				0.28	39.2
ANTARKTIS V/2	First-Year	327-328	19860820	233	-67.3963	-1.5953	52232-1	In his calculations Gerhard Dieckmann considered a diameter of 10cm. Uncertainty about the station number.	no	0	1.01			0.5725	56.6832			0.63	0.515	6.1		9.47			3.1		3.1				0.19	7.8					41.0526	17.4311		17.4311				1.06836	43.859
ANTARKTIS V/2	First-Year	327-328	19860820	233	-67.3963	-1.5953	52232-1	In his calculations Gerhard Dieckmann considered a diameter of 10cm. Uncertainty about the station number.	no	0	1.01			0.65	64.3564			0.67	0.63	4.6		5.05			1.8		1.8				0.09	5.5					61.1111	13.4217		13.4217				0.671087	41.0109
ANTARKTIS V/2	First-Year	327-328	19860820	233	-67.3963	-1.5953	52232-1	In his calculations Gerhard Dieckmann considered a diameter of 10cm. Uncertainty about the station number.	no	0	1.01			0.7075	70.0495			0.745	0.67	3.8		6.97			1.4		1.4				0.17	5.2					30.5882	12.6368		12.6368				1.53447	46.9368
ANTARKTIS V/2	First-Year	327-328	19860820	233	-67.3963	-1.5953	52232-1	In his calculations Gerhard Dieckmann considered a diameter of 10cm. Uncertainty about the station number.	no	0	1.01			0.76	75.2475			0.775	0.745	6.6		34.5			1.7		1.7				0	20.3						8.83485		8.83485				0	105.498
ANTARKTIS V/2	First-Year	327-328	19860820	233	-67.3963	-1.5953	52232-1	In his calculations Gerhard Dieckmann considered a diameter of 10cm. Uncertainty about the station number.	no	0	1.01			0.7925	78.4653			0.81	0.775	4.1		30.34			0.3		0.3				0	18.7						2.50976		2.50976				0	156.441
ANTARKTIS V/2	First-Year	327-328	19860820	233	-67.3963	-1.5953	52232-1	In his calculations Gerhard Dieckmann considered a diameter of 10cm. Uncertainty about the station number.	no	0	1.01			0.8275	81.9307			0.845	0.81	4.1		41.71			0.1		0.1				3.14	14.3					4.55414	0.836585		0.836585				26.2688	119.632
ANTARKTIS V/2	First-Year	327-328	19860820	233	-67.3963	-1.5953	52232-1	In his calculations Gerhard Dieckmann considered a diameter of 10cm. Uncertainty about the station number.	no	0	1.01			0.86	85.1485			0.875	0.845	4.2		48.69			0.5		0.5				2.06	11.7					5.67961	4.08333		4.08333				16.8233	95.55
ANTARKTIS V/2	First-Year	327-328	19860820	233	-67.3963	-1.5953	52232-1	In his calculations Gerhard Dieckmann considered a diameter of 10cm. Uncertainty about the station number.	no	0	1.01			0.8925	88.3663			0.91	0.875	3.8		46.13			0.3		0.3				1.2	9.2					7.66667	2.70789		2.70789				10.8316	83.0421
ANTARKTIS V/2	First-Year	327-328	19860820	233	-67.3963	-1.5953	52232-1	In his calculations Gerhard Dieckmann considered a diameter of 10cm. Uncertainty about the station number.	no	0	1.01			0.9275	91.8317			0.945	0.91	3.8		48.69			0		0				0.92	10.3					11.1957	0		0				8.30421	92.9711
ANTARKTIS V/2	First-Year	327-328	19860820	233	-67.3963	-1.5953	52232-1	In his calculations Gerhard Dieckmann considered a diameter of 10cm. Uncertainty about the station number.	no	0	1.01			0.96	95.0495			0.975	0.945	4		43.75			1.8		1.8				1.1	10.4					9.45455	15.435		15.435				9.4325	89.18
ANTARKTIS V/2	First-Year	327-328	19860820	233	-67.3963	-1.5953	52232-1	In his calculations Gerhard Dieckmann considered a diameter of 10cm. Uncertainty about the station number.	no	0	1.01			0.9925	98.2673			1.01	0.975	5.2		21.08			3.2		3.2				0.72	8.8					12.2222	21.1077		21.1077				4.74923	58.0462
ANTARKTIS V/2	First-Year	331	19860821	234	-67.0708	-0.0346	52233-1	In his calculations Gerhard Dieckmann considered a diameter of 10cm.	no	1	0.41			0.02	4.87805			0.04	0	40.3		0.78			36.7		36.7				1.93	47.7					24.715	31.236		31.236				1.64266	40.5983
ANTARKTIS V/2	First-Year	331	19860821	234	-67.0708	-0.0346	52233-1	In his calculations Gerhard Dieckmann considered a diameter of 10cm.	no	0	0.41			0.07	17.0732			0.1	0.04	11.4		0.37			8.3		8.3				0.24	11.1					46.25	24.9728		24.9728				0.722105	33.3974
ANTARKTIS V/2	First-Year	331	19860821	234	-67.0708	-0.0346	52233-1	In his calculations Gerhard Dieckmann considered a diameter of 10cm.	no	0	0.41			0.13	31.7073			0.16	0.1	8.3		0.53			6.7		6.7				0.13	9.9					76.1538	27.688		27.688				0.537229	40.912
ANTARKTIS V/2	First-Year	331	19860821	234	-67.0708	-0.0346	52233-1	In his calculations Gerhard Dieckmann considered a diameter of 10cm.	no	0	0.41			0.19	46.3415			0.22	0.16	9.4		2.44			5.6		5.6				0.3	10.9					36.3333	20.434		20.434				1.09468	39.7734
ANTARKTIS V/2	First-Year	331	19860821	234	-67.0708	-0.0346	52233-1	In his calculations Gerhard Dieckmann considered a diameter of 10cm.	no	0	0.41			0.265	64.6341			0.31	0.22	5.4		1.41			2		2				0.21	4.3					20.4762	12.7037		12.7037				1.33389	27.313
ANTARKTIS V/2	First-Year	331	19860821	234	-67.0708	-0.0346	52233-1	In his calculations Gerhard Dieckmann considered a diameter of 10cm.	no	0	0.41			0.34	82.9268			0.37	0.31	3.6		1.13			2.2		2.2				0.1	3.3					33	20.9611		20.9611				0.952778	31.4417
ANTARKTIS V/2	First-Year	331	19860821	234	-67.0708	-0.0346	52233-1	In his calculations Gerhard Dieckmann considered a diameter of 10cm.	no	0	0.41			0.39	95.122			0.41	0.37	3.9		1.84			2.2		2.2				0.15	3.9					26	19.3487		19.3487				1.31923	34.3
ANTARKTIS V/2	First-Year	331	19860821	234	-67.0708	-0.0346	52233-8	In his calculations Gerhard Dieckmann considered a diameter of 10cm.	no	1	0.935			0.035	3.74332			0.07	0	11.6		0.59			5.9		5.9				0.2	8.9					44.5	17.4457		17.4457				0.591379	26.3164
ANTARKTIS V/2	First-Year	331	19860821	234	-67.0708	-0.0346	52233-8	In his calculations Gerhard Dieckmann considered a diameter of 10cm.	no	0	0.935			0.085	9.09091			0.1	0.07	11.7		0.61			8.6		8.6				0.27	11.9					44.0741	25.212		25.212				0.791538	34.8863
ANTARKTIS V/2	First-Year	331	19860821	234	-67.0708	-0.0346	52233-8	In his calculations Gerhard Dieckmann considered a diameter of 10cm.	no	0	0.935			0.145	15.508			0.19	0.1	9		0.82			5.6		5.6				0.23	8.5					36.9565	21.3422		21.3422				0.876556	32.3944
ANTARKTIS V/2	First-Year	331	19860821	234	-67.0708	-0.0346	52233-8	In his calculations Gerhard Dieckmann considered a diameter of 10cm.	no	0	0.935			0.245	26.2032			0.3	0.19	6.3		0.23			6.5		6.5				0.22	8.8					40	35.3889		35.3889				1.19778	47.9111
ANTARKTIS V/2	First-Year	331	19860821	234	-67.0708	-0.0346	52233-8	In his calculations Gerhard Dieckmann considered a diameter of 10cm.	no	0	0.935			0.3525	37.7005			0.405	0.3	6.2		0.59			5.2		5.2				0.19	8.5					44.7368	28.7677		28.7677				1.05113	47.0242
ANTARKTIS V/2	First-Year	331	19860821	234	-67.0708	-0.0346	52233-8	In his calculations Gerhard Dieckmann considered a diameter of 10cm.	no	0	0.935			0.425	45.4545			0.445	0.405	6.3		0.33			3.8		3.8				0.12	7.2					60	20.6889		20.6889				0.653333	39.2
ANTARKTIS V/2	First-Year	331	19860821	234	-67.0708	-0.0346	52233-8	In his calculations Gerhard Dieckmann considered a diameter of 10cm.	no	0	0.935			0.475	50.8021			0.505	0.445	4.8		0.37			3		3				0.06	5.6					93.3333	21.4375		21.4375				0.42875	40.0167
ANTARKTIS V/2	First-Year	331	19860821	234	-67.0708	-0.0346	52233-8	In his calculations Gerhard Dieckmann considered a diameter of 10cm.	no	0	0.935			0.5375	57.4866			0.57	0.505	5.4		1.56			3.4		3.4				0.1	5.5					55	21.5963		21.5963				0.635185	34.9352
ANTARKTIS V/2	First-Year	331	19860821	234	-67.0708	-0.0346	52233-8	In his calculations Gerhard Dieckmann considered a diameter of 10cm.	no	0	0.935			0.5875	62.8342			0.605	0.57	5.4		5.32			3.6		3.6				0.16	6.2					38.75	22.8667		22.8667				1.0163	39.3815
ANTARKTIS V/2	First-Year	331	19860821	234	-67.0708	-0.0346	52233-8	In his calculations Gerhard Dieckmann considered a diameter of 10cm.	no	0	0.935			0.6175	66.0428			0.63	0.605	5.4		4.68			3.1		3.1				0.18	5					27.7778	19.6907		19.6907				1.14333	31.7593
ANTARKTIS V/2	First-Year	331	19860821	234	-67.0708	-0.0346	52233-8	In his calculations Gerhard Dieckmann considered a diameter of 10cm.	no	0	0.935			0.6675	71.3904			0.705	0.63	5		11			3.2		3.2				0.24	3.7					15.4167	21.952		21.952				1.6464	25.382
ANTARKTIS V/2	First-Year	331	19860821	234	-67.0708	-0.0346	52233-8	In his calculations Gerhard Dieckmann considered a diameter of 10cm.	no	0	0.935			0.755	80.7487			0.805	0.705	4.7		12.75			3.5		3.5				0.55	4.6					8.36364	25.5426		25.5426				4.01383	33.5702
ANTARKTIS V/2	First-Year	331	19860821	234	-67.0708	-0.0346	52233-8	In his calculations Gerhard Dieckmann considered a diameter of 10cm.	no	0	0.935			0.87	93.0481			0.935	0.805	4.6		6.46			5.7		5.7				0.49	8					16.3265	42.5022		42.5022				3.6537	59.6522
ANTARKTIS V/2	First-Year	338	19860822	235	-66.2315	1.376	52234-1	In his calculations Gerhard Dieckmann considered a diameter of 10cm.	no	1	0.47			0.025	5.31915			0.05	0	13.1		0.1			10.4		10.4				0.07	8.8					125.714	27.2305		27.2305				0.183282	23.0412
ANTARKTIS V/2	First-Year	338	19860822	235	-66.2315	1.376	52234-1	In his calculations Gerhard Dieckmann considered a diameter of 10cm.	no	0	0.47			0.06	12.766			0.07	0.05	15.1		0.56			11.2		11.2				0.3	16.2					54	25.4411		25.4411				0.681457	36.7987
ANTARKTIS V/2	First-Year	338	19860822	235	-66.2315	1.376	52234-1	In his calculations Gerhard Dieckmann considered a diameter of 10cm.	no	0	0.47			0.095	20.2128			0.12	0.07	10.3		0.27			9.2		9.2				0.18	10.5					58.3333	30.6369		30.6369				0.599417	34.966
ANTARKTIS V/2	First-Year	338	19860822	235	-66.2315	1.376	52234-1	In his calculations Gerhard Dieckmann considered a diameter of 10cm.	no	0	0.47			0.13	27.6596			0.14	0.12	14.1		0.44			10.5		10.5				0.26	17.3					66.5385	25.5426		25.5426				0.632482	42.0844
ANTARKTIS V/2	First-Year	338	19860822	235	-66.2315	1.376	52234-1	In his calculations Gerhard Dieckmann considered a diameter of 10cm.	no	0	0.47			0.155	32.9787			0.17	0.14	8		0.23			6.7		6.7				0.14	10					71.4286	28.7262		28.7262				0.60025	42.875
ANTARKTIS V/2	First-Year	338	19860822	235	-66.2315	1.376	52234-1	In his calculations Gerhard Dieckmann considered a diameter of 10cm.	no	0	0.47			0.185	39.3617			0.2	0.17	9.6		0.56			6.6		6.6				0.18	11.5					63.8889	23.5812		23.5812				0.643125	41.0885
ANTARKTIS V/2	First-Year	338	19860822	235	-66.2315	1.376	52234-1	In his calculations Gerhard Dieckmann considered a diameter of 10cm.	no	0	0.47			0.22	46.8085			0.24	0.2	6.5		0.62			3.7		3.7				0.07	6.8					97.1429	19.5246		19.5246				0.369385	35.8831
ANTARKTIS V/2	First-Year	338	19860822	235	-66.2315	1.376	52234-1	In his calculations Gerhard Dieckmann considered a diameter of 10cm.	no	0	0.47			0.275	58.5106			0.31	0.24	4.9		0.86			3		3				0.07	5.7					81.4286	21		21				0.49	39.9
ANTARKTIS V/2	First-Year	338	19860822	235	-66.2315	1.376	52234-1	In his calculations Gerhard Dieckmann considered a diameter of 10cm.	no	0	0.47			0.325	69.1489			0.34	0.31	4.7		0.68			2.7		2.7				0.07	6					85.7143	19.7043		19.7043				0.510851	43.7872
ANTARKTIS V/2	First-Year	338	19860822	235	-66.2315	1.376	52234-1	In his calculations Gerhard Dieckmann considered a diameter of 10cm.	no	0	0.47			0.36	76.5957			0.38	0.34	4.3		0.56			2.6		2.6				0.06	4.8					80	20.7395		20.7395				0.478605	38.2884
ANTARKTIS V/2	First-Year	338	19860822	235	-66.2315	1.376	52234-1	In his calculations Gerhard Dieckmann considered a diameter of 10cm.	no	0	0.47			0.425	90.4255			0.47	0.38	4.1		1.32			8		8				0.09	5.1					56.6667	66.9268		66.9268				0.752927	42.6659
ANTARKTIS V/2	First-Year	344	19860823	236	-65.4541	2.3136	52235-1	In his calculations Gerhard Dieckmann considered a diameter of 10cm.	no	1	0.6			0.045	7.5			0.09	0	7.9		0.91			7.1		7.1				0.11	8.6					78.1818	30.8266		30.8266				0.477595	37.3392
ANTARKTIS V/2	First-Year	344	19860823	236	-65.4541	2.3136	52235-1	In his calculations Gerhard Dieckmann considered a diameter of 10cm.	no	0	0.6			0.1375	22.9167			0.185	0.09	13		2.15			6.9		6.9				0.47	11.5					24.4681	18.2054		18.2054				1.24008	30.3423
ANTARKTIS V/2	First-Year	344	19860823	236	-65.4541	2.3136	52235-1	In his calculations Gerhard Dieckmann considered a diameter of 10cm.	no	0	0.6			0.1975	32.9167			0.21	0.185	7.4		2.69			1.9		1.9				0.18	7.1					39.4444	8.80676		8.80676				0.834324	32.9095
ANTARKTIS V/2	First-Year	344	19860823	236	-65.4541	2.3136	52235-1	In his calculations Gerhard Dieckmann considered a diameter of 10cm.	no	0	0.6			0.2275	37.9167			0.245	0.21	6.1		2.08			3.2		3.2				0.11	6					54.5455	17.9934		17.9934				0.618525	33.7377
ANTARKTIS V/2	First-Year	344	19860823	236	-65.4541	2.3136	52235-1	In his calculations Gerhard Dieckmann considered a diameter of 10cm.	no	0	0.6			0.2925	48.75			0.34	0.245	5.6		0.97			1.5		1.5				0.07	2.9					41.4286	9.1875		9.1875				0.42875	17.7625
ANTARKTIS V/2	First-Year	344	19860823	236	-65.4541	2.3136	52235-1	In his calculations Gerhard Dieckmann considered a diameter of 10cm.	no	0	0.6			0.355	59.1667			0.37	0.34	4.6		1.01			0.8		0.8				0.09	1.5					16.6667	5.96522		5.96522				0.671087	11.1848
ANTARKTIS V/2	First-Year	344	19860823	236	-65.4541	2.3136	52235-1	In his calculations Gerhard Dieckmann considered a diameter of 10cm.	no	0	0.6			0.395	65.8333			0.42	0.37	3.4		0.98			0.6		0.6				0.06	0.8					13.3333	6.05294		6.05294				0.605294	8.07059
ANTARKTIS V/2	First-Year	344	19860823	236	-65.4541	2.3136	52235-1	In his calculations Gerhard Dieckmann considered a diameter of 10cm.	no	0	0.6			0.45	75			0.48	0.42	3.1		0.65			0.8		0.8				0.02	0.6					30	8.85161		8.85161				0.22129	6.63871
ANTARKTIS V/2	First-Year	344	19860823	236	-65.4541	2.3136	52235-1	In his calculations Gerhard Dieckmann considered a diameter of 10cm.	no	0	0.6			0.495	82.5			0.51	0.48	2.6		1.02			0.8		0.8				0.05	0.4					8	10.5538		10.5538				0.659615	5.27692
ANTARKTIS V/2	First-Year	344	19860823	236	-65.4541	2.3136	52235-1	In his calculations Gerhard Dieckmann considered a diameter of 10cm.	no	0	0.6			0.535	89.1667			0.56	0.51	2		2.04			0.7		0.7				0.04	0.4					10	12.005		12.005				0.686	6.86
ANTARKTIS V/2	First-Year	344	19860823	236	-65.4541	2.3136	52235-1	In his calculations Gerhard Dieckmann considered a diameter of 10cm.	no	0	0.6			0.58	96.6667			0.6	0.56	3.3		2.08			4.9		4.9				0.11	2.4					21.8182	50.9303		50.9303				1.14333	24.9455
ANTARKTIS V/2	First-Year	351	19860824	237	-64.5244	2.2923	52236-1	In his calculations Gerhard Dieckmann considered a diameter of 10cm.	no	1	0.41			0.03	7.31707			0.06	0	57.1		0.07			34.4		34.4				1.57	50.8					32.3567	20.6641		20.6641				0.9431	30.5156
ANTARKTIS V/2	First-Year	351	19860824	237	-64.5244	2.2923	52236-1	In his calculations Gerhard Dieckmann considered a diameter of 10cm.	no	0	0.41			0.075	18.2927			0.09	0.06	28.2		0.08			22.9		22.9				1.45	40.6					28	27.8535		27.8535				1.76365	49.3823
ANTARKTIS V/2	First-Year	351	19860824	237	-64.5244	2.2923	52236-1	In his calculations Gerhard Dieckmann considered a diameter of 10cm.	no	0	0.41			0.1175	28.6585			0.145	0.09	14.4		0.37			10.9		10.9				0.2	13.7					68.5	25.9632		25.9632				0.476389	32.6326
ANTARKTIS V/2	First-Year	351	19860824	237	-64.5244	2.2923	52236-1	In his calculations Gerhard Dieckmann considered a diameter of 10cm.	no	0	0.41			0.16	39.0244			0.175	0.145	11.6		0.43			9.3		9.3				0.16	11.3					70.625	27.4991		27.4991				0.473103	33.4129
ANTARKTIS V/2	First-Year	351	19860824	237	-64.5244	2.2923	52236-1	In his calculations Gerhard Dieckmann considered a diameter of 10cm.	no	0	0.41			0.2125	51.8293			0.25	0.175	7.2		0.36			5.5		5.5				0.1	8					80	26.2014		26.2014				0.476389	38.1111
ANTARKTIS V/2	First-Year	351	19860824	237	-64.5244	2.2923	52236-1	In his calculations Gerhard Dieckmann considered a diameter of 10cm.	no	0	0.41			0.2675	65.2439			0.285	0.25	5.3		0.23			3.6		3.6				0.1	5.6					56	23.2981		23.2981				0.64717	36.2415
ANTARKTIS V/2	First-Year	351	19860824	237	-64.5244	2.2923	52236-1	In his calculations Gerhard Dieckmann considered a diameter of 10cm.	no	0	0.41			0.3125	76.2195			0.34	0.285	4.5		0.23			2.8		2.8				0.08	4.6					57.5	21.3422		21.3422				0.609778	35.0622
ANTARKTIS V/2	First-Year	351	19860824	237	-64.5244	2.2923	52236-1	In his calculations Gerhard Dieckmann considered a diameter of 10cm.	no	0	0.41			0.355	86.5854			0.37	0.34	3.7		0.59			2.7		2.7				0.08	4.9					61.25	25.0297		25.0297				0.741622	45.4243
ANTARKTIS V/2	First-Year	351	19860824	237	-64.5244	2.2923	52236-1	In his calculations Gerhard Dieckmann considered a diameter of 10cm.	no	0	0.41			0.39	95.122			0.41	0.37	7.5		1.05			5		5				0.24	8					33.3333	22.8667		22.8667				1.0976	36.5867
ANTARKTIS V/2	First-Year	354	19860825	238	-64.2926	3.1695	52237-1	In his calculations Gerhard Dieckmann considered a diameter of 10cm.	no	1	0.65			0.025	3.84615			0.05	0	24.9		0.2			14.7		14.7				0.63	25.7					40.7937	20.2494		20.2494				0.867831	35.402
ANTARKTIS V/2	First-Year	354	19860825	238	-64.2926	3.1695	52237-1	In his calculations Gerhard Dieckmann considered a diameter of 10cm.	no	0	0.65			0.07	10.7692			0.09	0.05	8.1		0.52			5.6		5.6				0.2	10.2					51	23.7136		23.7136				0.846914	43.1926
ANTARKTIS V/2	First-Year	354	19860825	238	-64.2926	3.1695	52237-1	In his calculations Gerhard Dieckmann considered a diameter of 10cm.	no	0	0.65			0.1375	21.1538			0.185	0.09	8.8		1.65			5.3		5.3				0.22	11.5					52.2727	20.658		20.658				0.8575	44.8239
ANTARKTIS V/2	First-Year	354	19860825	238	-64.2926	3.1695	52237-1	In his calculations Gerhard Dieckmann considered a diameter of 10cm.	no	0	0.65			0.2075	31.9231			0.23	0.185	8		2.14			3.1		3.1				0.23	10.6					46.087	13.2912		13.2912				0.986125	45.4475
ANTARKTIS V/2	First-Year	354	19860825	238	-64.2926	3.1695	52237-1	In his calculations Gerhard Dieckmann considered a diameter of 10cm.	no	0	0.65			0.2475	38.0769			0.265	0.23	5.1		1.43			2.1		2.1				0.18	6.5					36.1111	14.1235		14.1235				1.21059	43.7157
ANTARKTIS V/2	First-Year	354	19860825	238	-64.2926	3.1695	52237-1	In his calculations Gerhard Dieckmann considered a diameter of 10cm.	no	0	0.65			0.2775	42.6923			0.29	0.265	5.6		0.44			2.7		2.7				0.09	7.8					86.6667	16.5375		16.5375				0.55125	47.775
ANTARKTIS V/2	First-Year	354	19860825	238	-64.2926	3.1695	52237-1	In his calculations Gerhard Dieckmann considered a diameter of 10cm.	no	0	0.65			0.305	46.9231			0.32	0.29	6.3		0.49			2.3		2.3				0.11	7.5					68.1818	12.5222		12.5222				0.598889	40.8333
ANTARKTIS V/2	First-Year	354	19860825	238	-64.2926	3.1695	52237-1	In his calculations Gerhard Dieckmann considered a diameter of 10cm.	no	0	0.65			0.3425	52.6923			0.365	0.32	6.3		0.66			1.5		1.5				0.09	5.7					63.3333	8.16667		8.16667				0.49	31.0333
ANTARKTIS V/2	First-Year	354	19860825	238	-64.2926	3.1695	52237-1	In his calculations Gerhard Dieckmann considered a diameter of 10cm.	no	0	0.65			0.3825	58.8462			0.4	0.365	4.9		0.89			1.9		1.9				0.08	4					50	13.3		13.3				0.56	28
ANTARKTIS V/2	First-Year	354	19860825	238	-64.2926	3.1695	52237-1	In his calculations Gerhard Dieckmann considered a diameter of 10cm.	no	0	0.65			0.42	64.6154			0.44	0.4	3.8		0.49			1.6		1.6				0.05	2.1					42	14.4421		14.4421				0.451316	18.9553
ANTARKTIS V/2	First-Year	354	19860825	238	-64.2926	3.1695	52237-1	In his calculations Gerhard Dieckmann considered a diameter of 10cm.	no	0	0.65			0.4775	73.4615			0.515	0.44	2.7		0.48			1.9		1.9				0.04	1.6					40	24.137		24.137				0.508148	20.3259
ANTARKTIS V/2	First-Year	354	19860825	238	-64.2926	3.1695	52237-1	In his calculations Gerhard Dieckmann considered a diameter of 10cm.	no	0	0.65			0.5475	84.2308			0.58	0.515	1.8		1.1			1.5		1.5				0.04	1.7					42.5	28.5833		28.5833				0.762222	32.3944
ANTARKTIS V/2	First-Year	354	19860825	238	-64.2926	3.1695	52237-1	In his calculations Gerhard Dieckmann considered a diameter of 10cm.	no	0	0.65			0.5975	91.9231			0.615	0.58	3		0.75			2		2				0.05	3.4					68	22.8667		22.8667				0.571667	38.8733
ANTARKTIS V/2	First-Year	354	19860825	238	-64.2926	3.1695	52237-1	In his calculations Gerhard Dieckmann considered a diameter of 10cm.	no	0	0.65			0.6325	97.3077			0.65	0.615	3.2		0.56			3.4		3.4				0.12	4.7					39.1667	36.4437		36.4437				1.28625	50.3781
ANTARKTIS V/2	First-Year	363	19860826	239	-63.375	1.2522	52238-1	In his calculations Gerhard Dieckmann considered a diameter of 10cm.	no	1	0.5			0.025	5			0.05	0	29.4		1.07			6.6		6.6				0.18	19.6					108.889	7.7		7.7				0.21	22.8667
ANTARKTIS V/2	First-Year	363	19860826	239	-63.375	1.2522	52238-1	In his calculations Gerhard Dieckmann considered a diameter of 10cm.	no	0	0.5			0.0725	14.5			0.095	0.05	12.5		1.09			3.9		3.9				0.3	8.9					29.6667	10.7016		10.7016				0.8232	24.4216
ANTARKTIS V/2	First-Year	363	19860826	239	-63.375	1.2522	52238-1	In his calculations Gerhard Dieckmann considered a diameter of 10cm.	no	0	0.5			0.1225	24.5			0.15	0.095	10.9		4.18			7.3		7.3				0.48	10.7					22.2917	22.9716		22.9716				1.51046	33.6706
ANTARKTIS V/2	First-Year	363	19860826	239	-63.375	1.2522	52238-1	In his calculations Gerhard Dieckmann considered a diameter of 10cm.	no	0	0.5			0.1725	34.5			0.195	0.15	8.7		1.47			2.7		2.7				0.24	7.6					31.6667	10.6448		10.6448				0.946207	29.9632
ANTARKTIS V/2	First-Year	363	19860826	239	-63.375	1.2522	52238-1	In his calculations Gerhard Dieckmann considered a diameter of 10cm.	no	0	0.5			0.2225	44.5			0.25	0.195	6.8		0.78			2.1		2.1				0.11	4.2					38.1818	10.5926		10.5926				0.554853	21.1853
ANTARKTIS V/2	First-Year	363	19860826	239	-63.375	1.2522	52238-1	In his calculations Gerhard Dieckmann considered a diameter of 10cm.	no	0	0.5			0.2675	53.5			0.285	0.25	3.8		0.87			2.3		2.3				0.12	3.2					26.6667	20.7605		20.7605				1.08316	28.8842
ANTARKTIS V/2	First-Year	363	19860826	239	-63.375	1.2522	52238-1	In his calculations Gerhard Dieckmann considered a diameter of 10cm.	no	0	0.5			0.3075	61.5			0.33	0.285	3.4		1.15			1.4		1.4				0.12	1.1					9.16667	14.1235		14.1235				1.21059	11.0971
ANTARKTIS V/2	First-Year	363	19860826	239	-63.375	1.2522	52238-1	In his calculations Gerhard Dieckmann considered a diameter of 10cm.	no	0	0.5			0.3625	72.5			0.395	0.33	4.5		0.94			0.9		0.9				0.04	0					0	6.86		6.86				0.304889	0
ANTARKTIS V/2	First-Year	363	19860826	239	-63.375	1.2522	52238-1	In his calculations Gerhard Dieckmann considered a diameter of 10cm.	no	0	0.5			0.4475	89.5			0.5	0.395	3.3		2.29			2.4		2.4				0.06	1.5					25	24.9455		24.9455				0.623636	15.5909
ANTARKTIS V/2	First-Year	367	19860827	240	-63.1744	3.0412	52239-1	In his calculations Gerhard Dieckmann considered a diameter of 10cm.	no	1	1.04			0.02	1.92308			0.04	0	17.3		0.34			8.1		8.1				0.2	12.4					62	16.0595		16.0595				0.396532	24.585
ANTARKTIS V/2	First-Year	367	19860827	240	-63.1744	3.0412	52239-1	In his calculations Gerhard Dieckmann considered a diameter of 10cm.	no	0	1.04			0.06	5.76923			0.08	0.04	7.2		0.55			0.3		0.3				0	1.2						1.42917		1.42917				0	5.71667
ANTARKTIS V/2	First-Year	367	19860827	240	-63.1744	3.0412	52239-1	In his calculations Gerhard Dieckmann considered a diameter of 10cm.	no	0	1.04			0.0925	8.89423			0.105	0.08	6.1		1.01			1.1		1.1				0.2	5.9					29.5	6.18525		6.18525				1.12459	33.1754
ANTARKTIS V/2	First-Year	367	19860827	240	-63.1744	3.0412	52239-1	In his calculations Gerhard Dieckmann considered a diameter of 10cm.	no	0	1.04			0.1425	13.7019			0.18	0.105	4.8		1.11			0.8		0.8				0.15	4.4					29.3333	5.71667		5.71667				1.07187	31.4417
ANTARKTIS V/2	First-Year	367	19860827	240	-63.1744	3.0412	52239-1	In his calculations Gerhard Dieckmann considered a diameter of 10cm.	no	0	1.04			0.195	18.75			0.21	0.18	3.3		0.64			0.6		0.6				0.15	2.9					19.3333	6.23636		6.23636				1.55909	30.1424
ANTARKTIS V/2	First-Year	367	19860827	240	-63.1744	3.0412	52239-1	In his calculations Gerhard Dieckmann considered a diameter of 10cm.	no	0	1.04			0.255	24.5192			0.3	0.21	3		0.55			0.6		0.6				0.03	1.7					56.6667	6.86		6.86				0.343	19.4367
ANTARKTIS V/2	First-Year	367	19860827	240	-63.1744	3.0412	52239-1	In his calculations Gerhard Dieckmann considered a diameter of 10cm.	no	0	1.04			0.3175	30.5288			0.335	0.3	3.3		0.2			0.4		0.4				0.05	1.8					36	4.15758		4.15758				0.519697	18.7091
ANTARKTIS V/2	First-Year	367	19860827	240	-63.1744	3.0412	52239-1	In his calculations Gerhard Dieckmann considered a diameter of 10cm.	no	0	1.04			0.355	34.1346			0.375	0.335	4.7		0.15			1.2		1.2				0.03	2.7					90	8.75745		8.75745				0.218936	19.7043
ANTARKTIS V/2	First-Year	367	19860827	240	-63.1744	3.0412	52239-1	In his calculations Gerhard Dieckmann considered a diameter of 10cm.	no	0	1.04			0.405	38.9423			0.435	0.375	3.3		0.32			0.9		0.9				0.02	0.6					30	9.35455		9.35455				0.207879	6.23636
ANTARKTIS V/2	First-Year	367	19860827	240	-63.1744	3.0412	52239-1	In his calculations Gerhard Dieckmann considered a diameter of 10cm.	no	0	1.04			0.4475	43.0288			0.46	0.435	2.9		0.37			0.5		0.5				0.03	0.1					3.33333	5.91379		5.91379				0.354828	1.18276
ANTARKTIS V/2	First-Year	367	19860827	240	-63.1744	3.0412	52239-1	In his calculations Gerhard Dieckmann considered a diameter of 10cm.	no	0	1.04			0.4775	45.9135			0.495	0.46	2.5		0.38			0.7		0.7				0.03	0					0	9.604		9.604				0.4116	0
ANTARKTIS V/2	First-Year	367	19860827	240	-63.1744	3.0412	52239-1	In his calculations Gerhard Dieckmann considered a diameter of 10cm.	no	0	1.04			0.5375	51.6827			0.58	0.495	2.7		0.3			0.9		0.9				0.06	0.8					13.3333	11.4333		11.4333				0.762222	10.163
ANTARKTIS V/2	First-Year	367	19860827	240	-63.1744	3.0412	52239-1	In his calculations Gerhard Dieckmann considered a diameter of 10cm.	no	0	1.04			0.6125	58.8942			0.645	0.58	4.6		1.56			0.7		0.7				0.07	2.6					37.1429	5.21957		5.21957				0.521957	19.387
ANTARKTIS V/2	First-Year	367	19860827	240	-63.1744	3.0412	52239-1	In his calculations Gerhard Dieckmann considered a diameter of 10cm.	no	0	1.04			0.665	63.9423			0.685	0.645	4.5		2.89			1.1		1.1				0.08	3.4					42.5	8.38444		8.38444				0.609778	25.9156
ANTARKTIS V/2	First-Year	367	19860827	240	-63.1744	3.0412	52239-1	In his calculations Gerhard Dieckmann considered a diameter of 10cm.	no	0	1.04			0.7175	68.9904			0.75	0.685	4		2.38			1.2		1.2				0.04	3.4					85	10.29		10.29				0.343	29.155
ANTARKTIS V/2	First-Year	367	19860827	240	-63.1744	3.0412	52239-1	In his calculations Gerhard Dieckmann considered a diameter of 10cm.	no	0	1.04			0.7725	74.2788			0.795	0.75	4.1		1.13			1.1		1.1				0.11	3.8					34.5455	9.20244		9.20244				0.920244	31.7902
ANTARKTIS V/2	First-Year	367	19860827	240	-63.1744	3.0412	52239-1	In his calculations Gerhard Dieckmann considered a diameter of 10cm.	no	0	1.04			0.8525	81.9712			0.91	0.795	4.6		1.16			2.9		2.9				0.31	4.9					15.8065	21.6239		21.6239				2.31152	36.537
ANTARKTIS V/2	First-Year	367	19860827	240	-63.1744	3.0412	52239-1	In his calculations Gerhard Dieckmann considered a diameter of 10cm.	no	0	1.04			0.93	89.4231			0.95	0.91	5.5		2.04			3.5		3.5				0.38	4.1					10.7895	21.8273		21.8273				2.36982	25.5691
ANTARKTIS V/2	First-Year	367	19860827	240	-63.1744	3.0412	52239-1	In his calculations Gerhard Dieckmann considered a diameter of 10cm.	no	0	1.04			0.995	95.6731			1.04	0.95	3.7		1.66			2.7		2.7				0.27	4.1					15.1852	25.0297		25.0297				2.50297	38.0081
ANTARKTIS V/2	First-Year	370	19860828	241	-62.4575	3.4343	52240-1	In his calculations Gerhard Dieckmann considered a diameter of 10cm.	no	1	0.395			0.03	7.59494			0.06	0	8.8		4.21			3.4		3.4				0.34	8.4					24.7059	13.2523		13.2523				1.32523	32.7409
ANTARKTIS V/2	First-Year	370	19860828	241	-62.4575	3.4343	52240-1	In his calculations Gerhard Dieckmann considered a diameter of 10cm.	no	0	0.395			0.085	21.519			0.11	0.06	5.9		2.02			0.09		0.09				0.16	5.7					35.625	0.52322		0.52322				0.930169	33.1373
ANTARKTIS V/2	First-Year	370	19860828	241	-62.4575	3.4343	52240-1	In his calculations Gerhard Dieckmann considered a diameter of 10cm.	no	0	0.395			0.165	41.7722			0.22	0.11	3.8		3.48			1.4		1.4				0.07	1.8					25.7143	12.6368		12.6368				0.631842	16.2474
ANTARKTIS V/2	First-Year	370	19860828	241	-62.4575	3.4343	52240-1	In his calculations Gerhard Dieckmann considered a diameter of 10cm.	no	0	0.395			0.24	60.7595			0.26	0.22	3.2		3.99			1.4		1.4				0.1	0.3					3	15.0062		15.0062				1.07187	3.21562
ANTARKTIS V/2	First-Year	370	19860828	241	-62.4575	3.4343	52240-1	In his calculations Gerhard Dieckmann considered a diameter of 10cm.	no	0	0.395			0.295	74.6835			0.33	0.26	3.5		1.29			1.6		1.6				0.05	0.2					4	15.68		15.68				0.49	1.96
ANTARKTIS V/2	First-Year	370	19860828	241	-62.4575	3.4343	52240-1	In his calculations Gerhard Dieckmann considered a diameter of 10cm.	no	0	0.395			0.3625	91.7722			0.395	0.33	11.5		7.42			0.9		0.9				0.04	1.1					27.5	2.68435		2.68435				0.119304	3.28087
ANTARKTIS V/2	First-Year	375	19860829	242	-62.1528	4.4747	52241-1	In his calculations Gerhard Dieckmann considered a diameter of 10cm.	no	1	1.15			0.025	2.17391			0.05	0	14.6		0.26			10.3		10.3				0.03	9.9					330	24.1979		24.1979				0.0704795	23.2582
ANTARKTIS V/2	First-Year	375	19860829	242	-62.1528	4.4747	52241-1	In his calculations Gerhard Dieckmann considered a diameter of 10cm.	no	0	1.15			0.0775	6.73913			0.105	0.05	7.4		0.19			6.1		6.1				0.07	6.8					97.1429	28.2743		28.2743				0.324459	31.5189
ANTARKTIS V/2	First-Year	375	19860829	242	-62.1528	4.4747	52241-1	In his calculations Gerhard Dieckmann considered a diameter of 10cm.	no	0	1.15			0.1175	10.2174			0.13	0.105	5.5		0.18			4.7		4.7				0.04	5.8					145	29.3109		29.3109				0.249455	36.1709
ANTARKTIS V/2	First-Year	375	19860829	242	-62.1528	4.4747	52241-1	In his calculations Gerhard Dieckmann considered a diameter of 10cm.	no	0	1.15			0.1525	13.2609			0.175	0.13	4.3		0.12			3.4		3.4				0.03	4.5					150	27.1209		27.1209				0.239302	35.8953
ANTARKTIS V/2	First-Year	375	19860829	242	-62.1528	4.4747	52241-1	In his calculations Gerhard Dieckmann considered a diameter of 10cm.	no	0	1.15			0.1925	16.7391			0.21	0.175	4.8		0.19			2.8		2.8				0.02	0.45					22.5	20.0083		20.0083				0.142917	3.21562
ANTARKTIS V/2	First-Year	375	19860829	242	-62.1528	4.4747	52241-1	In his calculations Gerhard Dieckmann considered a diameter of 10cm.	no	0	1.15			0.245	21.3043			0.28	0.21	4.7		0.35			3.3		3.3				0.05	4.9					98	24.083		24.083				0.364894	35.7596
ANTARKTIS V/2	First-Year	375	19860829	242	-62.1528	4.4747	52241-1	In his calculations Gerhard Dieckmann considered a diameter of 10cm.	no	0	1.15			0.305	26.5217			0.33	0.28	7.5		0.42			3		3				0.1	6					60	13.72		13.72				0.457333	27.44
ANTARKTIS V/2	First-Year	375	19860829	242	-62.1528	4.4747	52241-1	In his calculations Gerhard Dieckmann considered a diameter of 10cm.	no	0	1.15			0.3425	29.7826			0.355	0.33	6.1		2.37			2.1		2.1				0.18	5.4					30	11.8082		11.8082				1.01213	30.3639
ANTARKTIS V/2	First-Year	375	19860829	242	-62.1528	4.4747	52241-1	In his calculations Gerhard Dieckmann considered a diameter of 10cm.	no	0	1.15			0.3675	31.9565			0.38	0.355	4.7		0.78			1.5		1.5				0.11	3.5					31.8182	10.9468		10.9468				0.802766	25.5426
ANTARKTIS V/2	First-Year	375	19860829	242	-62.1528	4.4747	52241-1	In his calculations Gerhard Dieckmann considered a diameter of 10cm.	no	0	1.15			0.405	35.2174			0.43	0.38	3.6		0.79			1.5		1.5				0.05	2.1					42	14.2917		14.2917				0.476389	20.0083
ANTARKTIS V/2	First-Year	375	19860829	242	-62.1528	4.4747	52241-1	In his calculations Gerhard Dieckmann considered a diameter of 10cm.	no	0	1.15			0.48	41.7391			0.53	0.43	3.2		1.09			2		2				0.05	2.1					42	21.4375		21.4375				0.535937	22.5094
ANTARKTIS V/2	First-Year	375	19860829	242	-62.1528	4.4747	52241-1	In his calculations Gerhard Dieckmann considered a diameter of 10cm.	no	0	1.15			0.5775	50.2174			0.625	0.53	3.8		0.78			1.8		1.8				0.05	1.6					32	16.2474		16.2474				0.451316	14.4421
ANTARKTIS V/2	First-Year	375	19860829	242	-62.1528	4.4747	52241-1	In his calculations Gerhard Dieckmann considered a diameter of 10cm.	no	0	1.15			0.6425	55.8696			0.66	0.625	3.5		0.81			1.2		1.2				0.12	1.3					10.8333	11.76		11.76				1.176	12.74
ANTARKTIS V/2	First-Year	375	19860829	242	-62.1528	4.4747	52241-1	In his calculations Gerhard Dieckmann considered a diameter of 10cm.	no	0	1.15			0.6925	60.2174			0.725	0.66	4.5		1.95			2.2		2.2				0.2	2.7					13.5	16.7689		16.7689				1.52444	20.58
ANTARKTIS V/2	First-Year	375	19860829	242	-62.1528	4.4747	52241-1	In his calculations Gerhard Dieckmann considered a diameter of 10cm.	no	0	1.15			0.74	64.3478			0.755	0.725	4.8		1.97			4.4		4.4				0.41	4.8					11.7073	31.4417		31.4417				2.92979	34.3
ANTARKTIS V/2	First-Year	375	19860829	242	-62.1528	4.4747	52241-1	In his calculations Gerhard Dieckmann considered a diameter of 10cm.	no	0	1.15			0.785	68.2609			0.815	0.755	6.1		2.43			4		4				0.16	4.6					28.75	22.4918		22.4918				0.899672	25.8656
ANTARKTIS V/2	First-Year	375	19860829	242	-62.1528	4.4747	52241-1	In his calculations Gerhard Dieckmann considered a diameter of 10cm.	no	0	1.15			0.9525	82.8261			0.985	0.92	4.5		1.87			4.2		4.2				0.17	3.9					22.9412	32.0133		32.0133				1.29578	29.7267
ANTARKTIS V/2	First-Year	375	19860829	242	-62.1528	4.4747	52241-1	In his calculations Gerhard Dieckmann considered a diameter of 10cm.	no	0	1.15			1.005	87.3913			1.025	0.985	4.7		1.62			7.3		7.3				0.18	5.7					31.6667	53.2745		53.2745				1.31362	41.5979
ANTARKTIS V/2	First-Year	375	19860829	242	-62.1528	4.4747	52241-1	In his calculations Gerhard Dieckmann considered a diameter of 10cm.	no	0	1.15			1.0625	92.3913			1.1	1.025	4.1		1.53			4.7		4.7				0.24	3.9					16.25	39.3195		39.3195				2.0078	32.6268
ANTARKTIS V/2	First-Year	375	19860829	242	-62.1528	4.4747	52241-1	In his calculations Gerhard Dieckmann considered a diameter of 10cm.	no	0	1.15			1.125	97.8261			1.15	1.1	4.8		0.69			6.2		6.2				0.16	4.5					28.125	44.3042		44.3042				1.14333	32.1562
ANTARKTIS V/2	Young-Ice	375	19860829	242	-62.1528	4.4747	52241-7	In his calculations Gerhard Dieckmann considered a diameter of 10cm.	no	1	0.235			0.0125	5.31915			0.025	0	11.7		0.06			8.4		8.4				0.54	12.6					23.3333	24.6256		24.6256				1.58308	36.9385
ANTARKTIS V/2	Young-Ice	375	19860829	242	-62.1528	4.4747	52241-7	In his calculations Gerhard Dieckmann considered a diameter of 10cm.	no	0	0.235			0.0425	18.0851			0.06	0.025	7.2		0.09			5.2		5.2				0.18	8.1					45	24.7722		24.7722				0.8575	38.5875
ANTARKTIS V/2	Young-Ice	375	19860829	242	-62.1528	4.4747	52241-7	In his calculations Gerhard Dieckmann considered a diameter of 10cm.	no	0	0.235			0.09	38.2979			0.12	0.06	6.2		0.06			4.5		4.5				0.17	7					41.1765	24.8952		24.8952				0.940484	38.7258
ANTARKTIS V/2	Young-Ice	375	19860829	242	-62.1528	4.4747	52241-7	In his calculations Gerhard Dieckmann considered a diameter of 10cm.	no	0	0.235			0.135	57.4468			0.15	0.12	5.4		0.07			4.3		4.3				0.15	5.8					38.6667	27.313		27.313				0.952778	36.8407
ANTARKTIS V/2	Young-Ice	375	19860829	242	-62.1528	4.4747	52241-7	In his calculations Gerhard Dieckmann considered a diameter of 10cm.	no	0	0.235			0.17	72.3404			0.19	0.15	5.3		0.13			4.2		4.2				0.15	6.1					40.6667	27.1811		27.1811				0.970755	39.4774
ANTARKTIS V/2	Young-Ice	375	19860829	242	-62.1528	4.4747	52241-7	In his calculations Gerhard Dieckmann considered a diameter of 10cm.	no	0	0.235			0.2125	90.4255			0.235	0.19	8.8		0.13			6.6		6.6				0.25	9.5					38	25.725		25.725				0.974432	37.0284
ANTARKTIS V/2	First-Year	381	19860902	246	-61.2434	7.2297	52245-1	In his calculations Gerhard Dieckmann considered a diameter of 10cm.	no	1	1.105			0.025	2.26244			0.05	0	10.5		1.35			15.1		15.1				0.17	7					41.1765	49.3267		49.3267				0.555333	22.8667
ANTARKTIS V/2	First-Year	381	19860902	246	-61.2434	7.2297	52245-1	In his calculations Gerhard Dieckmann considered a diameter of 10cm.	no	0	1.105			0.0825	7.46606			0.115	0.05	8.9		1.22			13.2		13.2				0.05	3					60	50.8719		50.8719				0.192697	11.5618
ANTARKTIS V/2	First-Year	381	19860902	246	-61.2434	7.2297	52245-1	In his calculations Gerhard Dieckmann considered a diameter of 10cm.	no	0	1.105			0.165	14.9321			0.215	0.115	6.2		2.22			24.1		24.1				0.22	10.9					49.5455	133.327		133.327				1.2171	60.3016
ANTARKTIS V/2	First-Year	381	19860902	246	-61.2434	7.2297	52245-1	In his calculations Gerhard Dieckmann considered a diameter of 10cm.	no	0	1.105			0.2375	21.4932			0.26	0.215	7.7		2.21			8.8		8.8				0.12	1					8.33333	39.2		39.2				0.534545	4.45455
ANTARKTIS V/2	First-Year	381	19860902	246	-61.2434	7.2297	52245-1	In his calculations Gerhard Dieckmann considered a diameter of 10cm.	no	0	1.105			0.2825	25.5656			0.305	0.26	10.6		2.47			19.5		19.5				0.23	2.2					9.56522	63.0991		63.0991				0.744245	7.11887
ANTARKTIS V/2	First-Year	381	19860902	246	-61.2434	7.2297	52245-1	In his calculations Gerhard Dieckmann considered a diameter of 10cm.	no	0	1.105			0.32	28.9593			0.335	0.305	5.1		3.69			6.8		6.8				0.14	0.8					5.71429	45.7333		45.7333				0.941569	5.38039
ANTARKTIS V/2	First-Year	381	19860902	246	-61.2434	7.2297	52245-1	In his calculations Gerhard Dieckmann considered a diameter of 10cm.	no	0	1.105			0.3575	32.3529			0.38	0.335	5.6		2.11			7.3		7.3				0.22	2.2					10	44.7125		44.7125				1.3475	13.475
ANTARKTIS V/2	First-Year	381	19860902	246	-61.2434	7.2297	52245-1	In his calculations Gerhard Dieckmann considered a diameter of 10cm.	no	0	1.105			0.3925	35.5204			0.405	0.38	5		1.45			6.7		6.7				0.09	3.8					42.2222	45.962		45.962				0.6174	26.068
ANTARKTIS V/2	First-Year	381	19860902	246	-61.2434	7.2297	52245-1	In his calculations Gerhard Dieckmann considered a diameter of 10cm.	no	0	1.105			0.4375	39.5928			0.47	0.405	6.5		11.46			8.9		8.9				0.24	5					20.8333	46.9646		46.9646				1.26646	26.3846
ANTARKTIS V/2	First-Year	381	19860902	246	-61.2434	7.2297	52245-1	In his calculations Gerhard Dieckmann considered a diameter of 10cm.	no	0	1.105			0.575	52.0362			0.6	0.55	5.4		6.03			6.4		6.4				0.2	4.3					21.5	40.6519		40.6519				1.27037	27.313
ANTARKTIS V/2	First-Year	381	19860902	246	-61.2434	7.2297	52245-1	In his calculations Gerhard Dieckmann considered a diameter of 10cm.	no	0	1.105			0.625	56.5611			0.65	0.6	4.5		2.67			5		5				0.15	2.2					14.6667	38.1111		38.1111				1.14333	16.7689
ANTARKTIS V/2	First-Year	381	19860902	246	-61.2434	7.2297	52245-1	In his calculations Gerhard Dieckmann considered a diameter of 10cm.	no	0	1.105			0.7	63.3484			0.75	0.65	5		3.98			7.8		7.8				0.13	1.6					12.3077	53.508		53.508				0.8918	10.976
ANTARKTIS V/2	First-Year	381	19860902	246	-61.2434	7.2297	52245-1	In his calculations Gerhard Dieckmann considered a diameter of 10cm.	no	0	1.105			0.765	69.2308			0.78	0.75	5.2		2.38			10.2		10.2				0.12	1.8					15	67.2808		67.2808				0.791538	11.8731
ANTARKTIS V/2	First-Year	381	19860902	246	-61.2434	7.2297	52245-1	In his calculations Gerhard Dieckmann considered a diameter of 10cm.	no	0	1.105			0.8	72.3982			0.82	0.78	5.4		4.15			4.3		4.3				0.39	4.1					10.5128	27.313		27.313				2.47722	26.0426
ANTARKTIS V/2	First-Year	381	19860902	246	-61.2434	7.2297	52245-1	In his calculations Gerhard Dieckmann considered a diameter of 10cm.	no	0	1.105			0.84	76.0181			0.86	0.82	4.6		3.52			4.4		4.4				0.24	2.8					11.6667	32.8087		32.8087				1.78957	20.8783
ANTARKTIS V/2	First-Year	381	19860902	246	-61.2434	7.2297	52245-1	In his calculations Gerhard Dieckmann considered a diameter of 10cm.	no	0	1.105			1.02	92.3077			1.06	0.98	5.3		1.87			23		23				0.31	7.6					24.5161	148.849		148.849				2.00623	49.1849
ANTARKTIS V/2	First-Year	381	19860902	246	-61.2434	7.2297	52245-1	In his calculations Gerhard Dieckmann considered a diameter of 10cm.	no	0	1.105			1.0825	97.9638			1.105	1.06	4.9		1.95			7.1		7.1				0.16	3.7					23.125	49.7		49.7				1.12	25.9
ANTARKTIS V/2	First-Year	382-383	19860903	247	-61.14	7.345	52246-1	In his calculations Gerhard Dieckmann considered a diameter of 10cm. Uncertainty about the station number	no	1	0.475			0.025	5.26316			0.05	0	19.2		2.35			1.3		1.3				0.14	10.1					72.1429	2.3224		2.3224				0.250104	18.0432
ANTARKTIS V/2	First-Year	382-383	19860903	247	-61.14	7.345	52246-1	In his calculations Gerhard Dieckmann considered a diameter of 10cm. Uncertainty about the station number	no	0	0.475			0.075	15.7895			0.1	0.05	7.4		1.4			1.1		1.1				0.07	3.1					44.2857	5.09865		5.09865				0.324459	14.3689
ANTARKTIS V/2	First-Year	382-383	19860903	247	-61.14	7.345	52246-1	In his calculations Gerhard Dieckmann considered a diameter of 10cm. Uncertainty about the station number	no	0	0.475			0.13	27.3684			0.16	0.1	5.2		2.67			1.4		1.4				0.17	2.6					15.2941	9.23462		9.23462				1.12135	17.15
ANTARKTIS V/2	First-Year	382-383	19860903	247	-61.14	7.345	52246-1	In his calculations Gerhard Dieckmann considered a diameter of 10cm. Uncertainty about the station number	no	0	0.475			0.1875	39.4737			0.215	0.16	4.5		0.75			0.6		0.6				0.23	3.1					13.4783	4.57333		4.57333				1.75311	23.6289
ANTARKTIS V/2	First-Year	382-383	19860903	247	-61.14	7.345	52246-1	In his calculations Gerhard Dieckmann considered a diameter of 10cm. Uncertainty about the station number	no	0	0.475			0.2575	54.2105			0.3	0.215	5.3		1.28			1.3		1.3				0.14	5.9					42.1429	8.41321		8.41321				0.906038	38.183
ANTARKTIS V/2	First-Year	382-383	19860903	247	-61.14	7.345	52246-1	In his calculations Gerhard Dieckmann considered a diameter of 10cm. Uncertainty about the station number	no	0	0.475			0.35	73.6842			0.4	0.3	3.9		0.99			1.7		1.7				0.43	2.9					6.74419	14.9513		14.9513				3.78179	25.5051
ANTARKTIS V/2	First-Year	382-383	19860903	247	-61.14	7.345	52246-1	In his calculations Gerhard Dieckmann considered a diameter of 10cm. Uncertainty about the station number	no	0	0.475			0.415	87.3684			0.43	0.4	5.1		3.17			1		1				0.31	4					12.9032	6.72549		6.72549				2.0849	26.902
ANTARKTIS V/2	First-Year	382-383	19860903	247	-61.14	7.345	52246-1	In his calculations Gerhard Dieckmann considered a diameter of 10cm. Uncertainty about the station number	no	0	0.475			0.4525	95.2632			0.475	0.43	8.2		8			4.3		4.3				1.03	12.8					12.4272	17.9866		17.9866				4.30841	53.5415
ANTARKTIS V/2	First-Year	391	19860905	249	-58.581	6.4318	52248-11	In his calculations Gerhard Dieckmann considered a diameter of 10cm.	no	1	0.305			0.015	4.91803			0.03	0	14.1		0.22			11.6		11.6				0.23	24.6					106.957	28.2184		28.2184				0.559504	59.8426
ANTARKTIS V/2	First-Year	391	19860905	249	-58.581	6.4318	52248-11	In his calculations Gerhard Dieckmann considered a diameter of 10cm.	no	0	0.305			0.06	19.6721			0.09	0.03	10.6		0.53			7.5		7.5				0.19	19.4					102.105	24.2689		24.2689				0.614811	62.7755
ANTARKTIS V/2	First-Year	391	19860905	249	-58.581	6.4318	52248-11	In his calculations Gerhard Dieckmann considered a diameter of 10cm.	no	0	0.305			0.11	36.0656			0.13	0.09	6.9		0.35			2.4		2.4				0.04	8.5					212.5	11.9304		11.9304				0.198841	42.2536
ANTARKTIS V/2	First-Year	391	19860905	249	-58.581	6.4318	52248-11	In his calculations Gerhard Dieckmann considered a diameter of 10cm.	no	0	0.305			0.165	54.0984			0.2	0.13	4.6		1.31			2.3		2.3				0.14	6					42.8571	17.15		17.15				1.04391	44.7391
ANTARKTIS V/2	First-Year	391	19860905	249	-58.581	6.4318	52248-11	In his calculations Gerhard Dieckmann considered a diameter of 10cm.	no	0	0.305			0.225	73.7705			0.25	0.2	5		0.6			3.7		3.7				0.13	8					61.5385	25.382		25.382				0.8918	54.88
ANTARKTIS V/2	First-Year	391	19860905	249	-58.581	6.4318	52248-11	In his calculations Gerhard Dieckmann considered a diameter of 10cm.	no	0	0.305			0.265	86.8852			0.28	0.25	5.6		0.56			4.2		4.2				0.26	9.5					36.5385	25.725		25.725				1.5925	58.1875
ANTARKTIS V/2	First-Year	391	19860905	249	-58.581	6.4318	52248-11	In his calculations Gerhard Dieckmann considered a diameter of 10cm.	no	0	0.305			0.2925	95.9016			0.305	0.28	11.1		1.97			7.3		7.3				0.86	16.8					19.5349	22.5577		22.5577				2.65748	51.9135
ANTARKTIS V/2	First-Year	393	19860906	250	-58.1413	6.1824	52249-1	In his calculations Gerhard Dieckmann considered a diameter of 10cm.	no	1	0.35			0.015	4.28571			0.03	0	9.4		0.4			9.9		9.9				0.21	17.1					81.4286	36.1245		36.1245				0.766277	62.3968
ANTARKTIS V/2	First-Year	393	19860906	250	-58.1413	6.1824	52249-1	In his calculations Gerhard Dieckmann considered a diameter of 10cm.	no	0	0.35			0.0675	19.2857			0.105	0.03	7.2		0.28			5.4		5.4				0.07	11.8					168.571	25.725		25.725				0.333472	56.2139
ANTARKTIS V/2	First-Year	393	19860906	250	-58.1413	6.1824	52249-1	In his calculations Gerhard Dieckmann considered a diameter of 10cm.	no	0	0.35			0.145	41.4286			0.185	0.105	5.4		0.21			6.2		6.2				0.04	10.2					255	39.3815		39.3815				0.254074	64.7889
ANTARKTIS V/2	First-Year	393	19860906	250	-58.1413	6.1824	52249-1	In his calculations Gerhard Dieckmann considered a diameter of 10cm.	no	0	0.35			0.2	57.1429			0.215	0.185	5.4		0.27			3.6		3.6				0.05	8.6					172	22.8667		22.8667				0.317593	54.6259
ANTARKTIS V/2	First-Year	393	19860906	250	-58.1413	6.1824	52249-1	In his calculations Gerhard Dieckmann considered a diameter of 10cm.	no	0	0.35			0.265	75.7143			0.315	0.215	4.5		0.31			4.6		4.6				0.04	7.9					197.5	35.0622		35.0622				0.304889	60.2156
ANTARKTIS V/2	First-Year	393	19860906	250	-58.1413	6.1824	52249-1	In his calculations Gerhard Dieckmann considered a diameter of 10cm.	no	0	0.35			0.3325	95			0.35	0.315	4.4		1.03			4.7		4.7				0.04	5.9					147.5	36.6386		36.6386				0.311818	45.9932
AMERIEZ 88	First-Year	2	19880610	162	-60.67	-42	2	In his calculations Gerhard Dieckmann considered a diameter of 7.48cm. If NO3 is given, it was calculated from Gerhard's file as: (NO3+NO2)-NO2. If silicate is given, it is from a 'SiO2' column in Gerhard's file. Idem for NH4 coming from a 'NH3' column. Snow thickness was measured but not given. Locations were extracted manually from Fig. 1 in Garrison and Close (1993).	no	1	0.65			0.035	5.38462			0.07	0	3.1		0.143				2.08	2.08	0.22	3.99	6.29	0.2	5.2			31.45	1.20962	26		23.0142	23.0142	2.43419	44.1474	69.5958	2.2129	57.5355
AMERIEZ 88	First-Year	2	19880610	162	-60.67	-42	2	In his calculations Gerhard Dieckmann considered a diameter of 7.48cm. If NO3 is given, it was calculated from Gerhard's file as: (NO3+NO2)-NO2. If silicate is given, it is from a 'SiO2' column in Gerhard's file. Idem for NH4 coming from a 'NH3' column. Snow thickness was measured but not given. Locations were extracted manually from Fig. 1 in Garrison and Close (1993).	no	0	0.65			0.14	21.5385			0.21	0.07	11.8		1.251				4.34	4.34	0.26	4.79	9.39	0.4	14.2			23.475	0.661268	35.5		12.6154	12.6154	0.755763	13.9235	27.2947	1.16271	41.2763
AMERIEZ 88	First-Year	2	19880610	162	-60.67	-42	2	In his calculations Gerhard Dieckmann considered a diameter of 7.48cm. If NO3 is given, it was calculated from Gerhard's file as: (NO3+NO2)-NO2. If silicate is given, it is from a 'SiO2' column in Gerhard's file. Idem for NH4 coming from a 'NH3' column. Snow thickness was measured but not given. Locations were extracted manually from Fig. 1 in Garrison and Close (1993).	no	0	0.65			0.32	49.2308			0.43	0.21	5.2		0.781				1.57	1.57	0.43			0.15	8			0	0	53.3333		10.356	10.356	2.83635			0.989423	52.7692
AMERIEZ 88	First-Year	2	19880610	162	-60.67	-42	2	In his calculations Gerhard Dieckmann considered a diameter of 7.48cm. If NO3 is given, it was calculated from Gerhard's file as: (NO3+NO2)-NO2. If silicate is given, it is from a 'SiO2' column in Gerhard's file. Idem for NH4 coming from a 'NH3' column. Snow thickness was measured but not given. Locations were extracted manually from Fig. 1 in Garrison and Close (1993).	no	0	0.65			0.54	83.0769			0.65	0.43	4.4		0.133				1.61	1.61	0.39	5.35	7.35	0.32				22.9688				12.5507	12.5507	3.04023	41.7057	57.2966	2.49455
AMERIEZ 88	First-Year	4	19880610	162	-60.67	-42	4	In his calculations Gerhard Dieckmann considered a diameter of 7.48cm. If NO3 is given, it was calculated from Gerhard's file as: (NO3+NO2)-NO2. If silicate is given, it is from a 'SiO2' column in Gerhard's file. Idem for NH4 coming from a 'NH3' column. Snow thickness was measured but not given. Locations were extracted manually from Fig. 1 in Garrison and Close (1993).	no	1	0.77			0.05	6.49351			0.1	0	6.8		0.34				1.8	1.8	0.3	4	6.1	0.18	8.4			33.8889	0.72619	46.6667		9.07941	9.07941	1.51324	20.1765	30.7691	0.907941	42.3706
AMERIEZ 88	First-Year	4	19880610	162	-60.67	-42	4	In his calculations Gerhard Dieckmann considered a diameter of 7.48cm. If NO3 is given, it was calculated from Gerhard's file as: (NO3+NO2)-NO2. If silicate is given, it is from a 'SiO2' column in Gerhard's file. Idem for NH4 coming from a 'NH3' column. Snow thickness was measured but not given. Locations were extracted manually from Fig. 1 in Garrison and Close (1993).	no	0	0.77			0.14	18.1818			0.18	0.1	5.6		0.589				2.74	2.74	0.16	3.92	6.82	0.4	11.6			17.05	0.587931	29		16.7825	16.7825	0.98	24.01	41.7725	2.45	71.05
AMERIEZ 88	First-Year	4	19880610	162	-60.67	-42	4	In his calculations Gerhard Dieckmann considered a diameter of 7.48cm. If NO3 is given, it was calculated from Gerhard's file as: (NO3+NO2)-NO2. If silicate is given, it is from a 'SiO2' column in Gerhard's file. Idem for NH4 coming from a 'NH3' column. Snow thickness was measured but not given. Locations were extracted manually from Fig. 1 in Garrison and Close (1993).	no	0	0.77			0.28	36.3636			0.38	0.18	4.4		0.916				2.14	2.14	0.36	8.65	11.15	0.23	10.2			48.4783	1.09314	44.3478		16.6823	16.6823	2.80636	67.4307	86.9193	1.79295	79.5136
AMERIEZ 88	First-Year	4	19880610	162	-60.67	-42	4	In his calculations Gerhard Dieckmann considered a diameter of 7.48cm. If NO3 is given, it was calculated from Gerhard's file as: (NO3+NO2)-NO2. If silicate is given, it is from a 'SiO2' column in Gerhard's file. Idem for NH4 coming from a 'NH3' column. Snow thickness was measured but not given. Locations were extracted manually from Fig. 1 in Garrison and Close (1993).	no	0	0.77			0.5075	65.9091			0.635	0.38	3.1		3.149				0.64	0.64	0.36	2.49	3.49	0.36	10.6			9.69444	0.329245	29.4444		7.08129	7.08129	3.98323	27.5506	38.6152	3.98323	117.284
AMERIEZ 88	First-Year	4	19880610	162	-60.67	-42	4	In his calculations Gerhard Dieckmann considered a diameter of 7.48cm. If NO3 is given, it was calculated from Gerhard's file as: (NO3+NO2)-NO2. If silicate is given, it is from a 'SiO2' column in Gerhard's file. Idem for NH4 coming from a 'NH3' column. Snow thickness was measured but not given. Locations were extracted manually from Fig. 1 in Garrison and Close (1993).	no	0	0.77			0.7025	91.2338			0.77	0.635	5.9		28.19				2.57	2.57	0.23	6.07	8.87	1.98	16.9			4.4798	0.524852	8.53535		14.9408	14.9408	1.33712	35.2883	51.5663	11.5108	98.2492
AMERIEZ 88	First-Year	9	19880611	163	-60.75	-41.82	9	In his calculations Gerhard Dieckmann considered a diameter of 7.48cm. If NO3 is given, it was calculated from Gerhard's file as: (NO3+NO2)-NO2. If silicate is given, it is from a 'SiO2' column in Gerhard's file. Idem for NH4 coming from a 'NH3' column. Snow thickness was measured but not given. Locations were extracted manually from Fig. 1 in Garrison and Close (1993).	no	1	0.38			0.07	18.4211			0.14	0	8.1		3.03				1.98	1.98	0.22	2.44	4.64	0.31	10.3			14.9677	0.450485	33.2258		8.38444	8.38444	0.931605	10.3323	19.6484	1.31272	43.616
AMERIEZ 88	First-Year	9	19880611	163	-60.75	-41.82	9	In his calculations Gerhard Dieckmann considered a diameter of 7.48cm. If NO3 is given, it was calculated from Gerhard's file as: (NO3+NO2)-NO2. If silicate is given, it is from a 'SiO2' column in Gerhard's file. Idem for NH4 coming from a 'NH3' column. Snow thickness was measured but not given. Locations were extracted manually from Fig. 1 in Garrison and Close (1993).	no	0	0.38			0.18	47.3684			0.22	0.14	4.1		1.866				1.4	1.4	0.2	2.93	4.53	0.1	6.5			45.3	0.696923	65		11.7122	11.7122	1.67317	24.512	37.8973	0.836585	54.378
AMERIEZ 88	First-Year	9	19880611	163	-60.75	-41.82	9	In his calculations Gerhard Dieckmann considered a diameter of 7.48cm. If NO3 is given, it was calculated from Gerhard's file as: (NO3+NO2)-NO2. If silicate is given, it is from a 'SiO2' column in Gerhard's file. Idem for NH4 coming from a 'NH3' column. Snow thickness was measured but not given. Locations were extracted manually from Fig. 1 in Garrison and Close (1993).	no	0	0.38			0.3	78.9474			0.38	0.22	4.7		3.391				2.01	2.01	0.29	3.5	5.8	0.38	7			15.2632	0.828571	18.4211		14.6687	14.6687	2.11638	25.5426	42.3277	2.77319	51.0851
AMERIEZ 88	First-Year	16	19880612	164	-61.13	-42	16	In his calculations Gerhard Dieckmann considered a diameter of 7.48cm. If NO3 is given, it was calculated from Gerhard's file as: (NO3+NO2)-NO2. If silicate is given, it is from a 'SiO2' column in Gerhard's file. Idem for NH4 coming from a 'NH3' column. Snow thickness was measured but not given. Locations were extracted manually from Fig. 1 in Garrison and Close (1993).	no	1	0.435			0.045	10.3448			0.09	0	14		0.11				10.56	10.56	0.44	3.2	14.2	0.6	28.7			23.6667	0.494774	47.8333		25.872	25.872	1.078	7.84	34.79	1.47	70.315
AMERIEZ 88	First-Year	16	19880612	164	-61.13	-42	16	In his calculations Gerhard Dieckmann considered a diameter of 7.48cm. If NO3 is given, it was calculated from Gerhard's file as: (NO3+NO2)-NO2. If silicate is given, it is from a 'SiO2' column in Gerhard's file. Idem for NH4 coming from a 'NH3' column. Snow thickness was measured but not given. Locations were extracted manually from Fig. 1 in Garrison and Close (1993).	no	0	0.435			0.165	37.931			0.24	0.09	6.5		0.06				2.6	2.6	0.3	3.67	6.57	0.16	6.3			41.0625	1.04286	39.375		13.72	13.72	1.58308	19.3663	34.6694	0.844308	33.2446
AMERIEZ 88	First-Year	16	19880612	164	-61.13	-42	16	In his calculations Gerhard Dieckmann considered a diameter of 7.48cm. If NO3 is given, it was calculated from Gerhard's file as: (NO3+NO2)-NO2. If silicate is given, it is from a 'SiO2' column in Gerhard's file. Idem for NH4 coming from a 'NH3' column. Snow thickness was measured but not given. Locations were extracted manually from Fig. 1 in Garrison and Close (1993).	no	0	0.435			0.3375	77.5862			0.435	0.24	6.3		0.18				2.97	2.97	0.43	3.52	6.92	0.13	9			53.2308	0.768889	69.2308		16.17	16.17	2.34111	19.1644	37.6756	0.707778	49
AMERIEZ 88	Young-Ice	17	19880612	164	-61.13	-42	17	In his calculations Gerhard Dieckmann considered a diameter of 7.48cm. If NO3 is given, it was calculated from Gerhard's file as: (NO3+NO2)-NO2. If silicate is given, it is from a 'SiO2' column in Gerhard's file. Idem for NH4 coming from a 'NH3' column. Snow thickness was measured but not given. Locations were extracted manually from Fig. 1 in Garrison and Close (1993).	no	1	0.21			0.105	50			0.21	0	5.9		0.7				2.78	2.78	0.32	3.65	6.75	0.2	8.5			33.75	0.794118	42.5		16.1617	16.1617	1.86034	21.2195	39.2415	1.16271	49.4153
AMERIEZ 88	Young-Ice	18	19880612	164	-61.13	-42	18	In his calculations Gerhard Dieckmann considered a diameter of 7.48cm. If NO3 is given, it was calculated from Gerhard's file as: (NO3+NO2)-NO2. If silicate is given, it is from a 'SiO2' column in Gerhard's file. Idem for NH4 coming from a 'NH3' column. Snow thickness was measured but not given. Locations were extracted manually from Fig. 1 in Garrison and Close (1993).	no	1	0.11			0.055	50			0.11	0	10.2		0.73				6.64	6.64	0.36	4.63	11.63	0.38	22			30.6053	0.528636	57.8947		22.3286	22.3286	1.21059	15.5695	39.1087	1.27784	73.9804
AMERIEZ 88	First-Year	25	19880613	165	-61.27	-42.3	25	In his calculations Gerhard Dieckmann considered a diameter of 7.48cm. If NO3 is given, it was calculated from Gerhard's file as: (NO3+NO2)-NO2. If silicate is given, it is from a 'SiO2' column in Gerhard's file. Idem for NH4 coming from a 'NH3' column. Snow thickness was measured but not given. Locations were extracted manually from Fig. 1 in Garrison and Close (1993).	no	1	0.51			0.06	11.7647			0.12	0	10.4		0.4				3.97	3.97	0.53	8.18	12.68	0.75	19.1			16.9067	0.663874	25.4667		13.0934	13.0934	1.74798	26.9783	41.8196	2.47356	62.9933
AMERIEZ 88	First-Year	25	19880613	165	-61.27	-42.3	25	In his calculations Gerhard Dieckmann considered a diameter of 7.48cm. If NO3 is given, it was calculated from Gerhard's file as: (NO3+NO2)-NO2. If silicate is given, it is from a 'SiO2' column in Gerhard's file. Idem for NH4 coming from a 'NH3' column. Snow thickness was measured but not given. Locations were extracted manually from Fig. 1 in Garrison and Close (1993).	no	0	0.51			0.255	50			0.39	0.12	5.3		7.34				2.65	2.65	1.05			0.39	7.4					18.9744		17.15	17.15	6.79528			2.52396	47.8906
AMERIEZ 88	First-Year	25	19880613	165	-61.27	-42.3	25	In his calculations Gerhard Dieckmann considered a diameter of 7.48cm. If NO3 is given, it was calculated from Gerhard's file as: (NO3+NO2)-NO2. If silicate is given, it is from a 'SiO2' column in Gerhard's file. Idem for NH4 coming from a 'NH3' column. Snow thickness was measured but not given. Locations were extracted manually from Fig. 1 in Garrison and Close (1993).	no	0	0.51			0.45	88.2353			0.51	0.39	3.9		19.08				2.95	2.95	0.55	5.06	8.56	1.1	11.2			7.78182	0.764286	10.1818		25.9449	25.9449	4.83718	44.5021	75.2841	9.67436	98.5026
AMERIEZ 88	First-Year	26	19880613	165	-61.27	-42.3	26	In his calculations Gerhard Dieckmann considered a diameter of 7.48cm. If NO3 is given, it was calculated from Gerhard's file as: (NO3+NO2)-NO2. If silicate is given, it is from a 'SiO2' column in Gerhard's file. Idem for NH4 coming from a 'NH3' column. Snow thickness was measured but not given. Locations were extracted manually from Fig. 1 in Garrison and Close (1993).	no	1	0.55			0.085	15.4545			0.17	0	8.1		2.79				6.23	6.23	0.67	7.92	14.82	0.45	18.8			32.9333	0.788298	41.7778		26.3814	26.3814	2.83716	33.5378	62.7563	1.90556	79.6099
AMERIEZ 88	First-Year	26	19880613	165	-61.27	-42.3	26	In his calculations Gerhard Dieckmann considered a diameter of 7.48cm. If NO3 is given, it was calculated from Gerhard's file as: (NO3+NO2)-NO2. If silicate is given, it is from a 'SiO2' column in Gerhard's file. Idem for NH4 coming from a 'NH3' column. Snow thickness was measured but not given. Locations were extracted manually from Fig. 1 in Garrison and Close (1993).	no	0	0.55			0.26	47.2727			0.35	0.17	4.4		10.27				2.27	2.27	0.53	3.59	6.39	0.24	4.9			26.625	1.30408	20.4167		17.6957	17.6957	4.13159	27.9857	49.813	1.87091	38.1977
AMERIEZ 88	First-Year	26	19880613	165	-61.27	-42.3	26	In his calculations Gerhard Dieckmann considered a diameter of 7.48cm. If NO3 is given, it was calculated from Gerhard's file as: (NO3+NO2)-NO2. If silicate is given, it is from a 'SiO2' column in Gerhard's file. Idem for NH4 coming from a 'NH3' column. Snow thickness was measured but not given. Locations were extracted manually from Fig. 1 in Garrison and Close (1993).	no	0	0.55			0.45	81.8182			0.55	0.35	3.1		29.36				2.81	2.81	0.59	4.6	8	2.83	8.9			2.82686	0.898876	3.14488		31.0913	31.0913	6.52806	50.8968	88.5161	31.3126	98.4742
AMERIEZ 88	First-Year	33.1	19880615	167	-61.5	-40.63	33.1	In his calculations Gerhard Dieckmann considered a diameter of 7.48cm. If NO3 is given, it was calculated from Gerhard's file as: (NO3+NO2)-NO2. If silicate is given, it is from a 'SiO2' column in Gerhard's file. Idem for NH4 coming from a 'NH3' column. Snow thickness was measured but not given. Locations were extracted manually from Fig. 1 in Garrison and Close (1993).	no	1	0.4			0.08	20			0.16	0	5.4		0.57				2.89	2.89	0.71	4.73	8.33	0.14				59.5				18.3569	18.3569	4.50981	30.0443	52.9109	0.889259	0
AMERIEZ 88	First-Year	33.1	19880615	167	-61.5	-40.63	33.1	In his calculations Gerhard Dieckmann considered a diameter of 7.48cm. If NO3 is given, it was calculated from Gerhard's file as: (NO3+NO2)-NO2. If silicate is given, it is from a 'SiO2' column in Gerhard's file. Idem for NH4 coming from a 'NH3' column. Snow thickness was measured but not given. Locations were extracted manually from Fig. 1 in Garrison and Close (1993).	no	0	0.4			0.23	57.5			0.3	0.16	5.1		1.01				2.59	2.59	0.61	4.06	7.26	0.27	9			26.8889	0.806667	33.3333		17.419	17.419	4.10255	27.3055	48.8271	1.81588	60.5294
AMERIEZ 88	First-Year	33.1	19880615	167	-61.5	-40.63	33.1	In his calculations Gerhard Dieckmann considered a diameter of 7.48cm. If NO3 is given, it was calculated from Gerhard's file as: (NO3+NO2)-NO2. If silicate is given, it is from a 'SiO2' column in Gerhard's file. Idem for NH4 coming from a 'NH3' column. Snow thickness was measured but not given. Locations were extracted manually from Fig. 1 in Garrison and Close (1993).	no	0	0.4			0.35	87.5			0.4	0.3	7.5		0.73				2.94	2.94	1.06	6.69	10.69	2.65	15.2			4.03396	0.703289	5.73585		13.4456	13.4456	4.84773	30.5956	48.8889	12.1193	69.5147
AMERIEZ 88	First-Year	33.2	19880615	167	-61.5	-40.63	33.2	In his calculations Gerhard Dieckmann considered a diameter of 7.48cm. If NO3 is given, it was calculated from Gerhard's file as: (NO3+NO2)-NO2. If silicate is given, it is from a 'SiO2' column in Gerhard's file. Idem for NH4 coming from a 'NH3' column. Snow thickness was measured but not given. Locations were extracted manually from Fig. 1 in Garrison and Close (1993).	no	1	0.44			0.07	15.9091			0.14	0	8.3		0.56				6.25	6.25	0.85	6.13	13.23	0.24	19.5			55.125	0.678462	81.25		25.8283	25.8283	3.51265	25.3324	54.6734	0.991807	80.5843
AMERIEZ 88	First-Year	33.2	19880615	167	-61.5	-40.63	33.2	In his calculations Gerhard Dieckmann considered a diameter of 7.48cm. If NO3 is given, it was calculated from Gerhard's file as: (NO3+NO2)-NO2. If silicate is given, it is from a 'SiO2' column in Gerhard's file. Idem for NH4 coming from a 'NH3' column. Snow thickness was measured but not given. Locations were extracted manually from Fig. 1 in Garrison and Close (1993).	no	0	0.44			0.215	48.8636			0.29	0.14	4.8		1.23				2.53	2.53	0.87	5.82	9.22		9.2				1.00217			18.079	18.079	6.21687	41.5888	65.8846		65.7417
AMERIEZ 88	First-Year	33.2	19880615	167	-61.5	-40.63	33.2	In his calculations Gerhard Dieckmann considered a diameter of 7.48cm. If NO3 is given, it was calculated from Gerhard's file as: (NO3+NO2)-NO2. If silicate is given, it is from a 'SiO2' column in Gerhard's file. Idem for NH4 coming from a 'NH3' column. Snow thickness was measured but not given. Locations were extracted manually from Fig. 1 in Garrison and Close (1993).	no	0	0.44			0.365	82.9545			0.44	0.29	4.8		2.79				3.31	3.31	0.79	7.37	11.47	0.47	8			24.4043	1.43375	17.0213		23.6527	23.6527	5.64521	52.6648	81.9627	3.35854	57.1667
AMERIEZ 88	First-Year	42	19880622	174	-59.75	-44.34	42	In his calculations Gerhard Dieckmann considered a diameter of 7.48cm. If NO3 is given, it was calculated from Gerhard's file as: (NO3+NO2)-NO2. If silicate is given, it is from a 'SiO2' column in Gerhard's file. Idem for NH4 coming from a 'NH3' column. Snow thickness was measured but not given. Locations were extracted manually from Fig. 1 in Garrison and Close (1993).	no	1	1.3			0.04	3.07692			0.08	0	1		0.29				1.92	1.92	0.88	2.33	5.13	0.1	6.1			51.3	0.840984	61		65.856	65.856	30.184	79.919	175.959	3.43	209.23
AMERIEZ 88	First-Year	42	19880622	174	-59.75	-44.34	42	In his calculations Gerhard Dieckmann considered a diameter of 7.48cm. If NO3 is given, it was calculated from Gerhard's file as: (NO3+NO2)-NO2. If silicate is given, it is from a 'SiO2' column in Gerhard's file. Idem for NH4 coming from a 'NH3' column. Snow thickness was measured but not given. Locations were extracted manually from Fig. 1 in Garrison and Close (1993).	no	0	1.3			0.185	14.2308			0.29	0.08	10.4		2.32				0.87	0.87	0.63	4.26	5.76	0.29	20.8			19.8621	0.276923	71.7241		2.86933	2.86933	2.07779	14.0498	18.9969	0.956442	68.6
AMERIEZ 88	First-Year	42	19880622	174	-59.75	-44.34	42	In his calculations Gerhard Dieckmann considered a diameter of 7.48cm. If NO3 is given, it was calculated from Gerhard's file as: (NO3+NO2)-NO2. If silicate is given, it is from a 'SiO2' column in Gerhard's file. Idem for NH4 coming from a 'NH3' column. Snow thickness was measured but not given. Locations were extracted manually from Fig. 1 in Garrison and Close (1993).	no	0	1.3			0.39	30			0.49	0.29	4.8		3.55				1.76	1.76	0.54	3.67	5.97	0.15	12.6			39.8	0.47381	84		12.5767	12.5767	3.85875	26.2252	42.6606	1.07187	90.0375
AMERIEZ 88	First-Year	42	19880622	174	-59.75	-44.34	42	In his calculations Gerhard Dieckmann considered a diameter of 7.48cm. If NO3 is given, it was calculated from Gerhard's file as: (NO3+NO2)-NO2. If silicate is given, it is from a 'SiO2' column in Gerhard's file. Idem for NH4 coming from a 'NH3' column. Snow thickness was measured but not given. Locations were extracted manually from Fig. 1 in Garrison and Close (1993).	no	0	1.3			0.665	51.1538			0.84	0.49	7		12.33				4.74	4.74	0.36	4.4	9.5	0.57	23.5			16.6667	0.404255	41.2281		23.226	23.226	1.764	21.56	46.55	2.793	115.15
AMERIEZ 88	First-Year	42	19880622	174	-59.75	-44.34	42	In his calculations Gerhard Dieckmann considered a diameter of 7.48cm. If NO3 is given, it was calculated from Gerhard's file as: (NO3+NO2)-NO2. If silicate is given, it is from a 'SiO2' column in Gerhard's file. Idem for NH4 coming from a 'NH3' column. Snow thickness was measured but not given. Locations were extracted manually from Fig. 1 in Garrison and Close (1993).	no	0	1.3			0.945	72.6923			1.05	0.84	8.4		2.32				5.68	5.68	0.72	8.3	14.7	0.42	25.6			35	0.574219	60.9524		23.1933	23.1933	2.94	33.8917	60.025	1.715	104.533
AMERIEZ 88	First-Year	42	19880622	174	-59.75	-44.34	42	In his calculations Gerhard Dieckmann considered a diameter of 7.48cm. If NO3 is given, it was calculated from Gerhard's file as: (NO3+NO2)-NO2. If silicate is given, it is from a 'SiO2' column in Gerhard's file. Idem for NH4 coming from a 'NH3' column. Snow thickness was measured but not given. Locations were extracted manually from Fig. 1 in Garrison and Close (1993).	no	0	1.3			1.175	90.3846			1.3	1.05	3.7		4.82				2.31	2.31	0.69	6.67	9.67	0.35	16.5			27.6286	0.586061	47.1429		21.4143	21.4143	6.39649	61.8327	89.6435	3.24459	152.959
AMERIEZ 88	Young-Ice	45	19880623	175	-59.62	-44.18	45	In his calculations Gerhard Dieckmann considered a diameter of 7.48cm. If NO3 is given, it was calculated from Gerhard's file as: (NO3+NO2)-NO2. If silicate is given, it is from a 'SiO2' column in Gerhard's file. Idem for NH4 coming from a 'NH3' column. Snow thickness was measured but not given. Locations were extracted manually from Fig. 1 in Garrison and Close (1993).	no	1	0.26			0.09	34.6154			0.18	0	8.8		3.58				0.98	0.98	0.42	4.86	6.26	1.08	11.1			5.7963	0.563964	10.2778		3.81977	3.81977	1.63705	18.943	24.3998	4.20955	43.2648
AMERIEZ 88	Young-Ice	45	19880623	175	-59.62	-44.18	45	In his calculations Gerhard Dieckmann considered a diameter of 7.48cm. If NO3 is given, it was calculated from Gerhard's file as: (NO3+NO2)-NO2. If silicate is given, it is from a 'SiO2' column in Gerhard's file. Idem for NH4 coming from a 'NH3' column. Snow thickness was measured but not given. Locations were extracted manually from Fig. 1 in Garrison and Close (1993).	no	0	0.26			0.22	84.6154			0.26	0.18	7.4		7.05				2.04	2.04	0.26	5.98	8.28	1.94	12			4.26804	0.69	6.18557		9.45568	9.45568	1.20514	27.7181	38.3789	8.99216	55.6216
ANTARKTIS VIII/2	First-Year	26103	19890918	262	-64.38	-44.16	26103		no	1	1.225			0.0475	3.87755			0.095	0	6.15		1.02	72.7682	10.029		7	7	0.18	3.201	10.381	0.56	13.8	241.418		18.5375	0.752246	24.6429		39.0407	39.0407	1.0039	17.8527	57.8973	3.12325	76.9659
ANTARKTIS VIII/2	First-Year	26103	19890918	262	-64.38	-44.16	26103		no	0	1.225			0.1525	12.449			0.21	0.095	1.03		1.11	226.57	4.81423		6.9	6.9	0.2	3.281	10.381	0.64	13.8	141.842		16.2203	0.752246	21.5625		229.777	229.777	6.66019	109.26	345.697	21.3126	459.553
ANTARKTIS VIII/2	First-Year	26103	19890918	262	-64.38	-44.16	26103		no	0	1.225			0.235	19.1837			0.26	0.21	5.55		4.41	140.81	7.17206		0.9	0.9	0.24	4.896	6.036	1.43	8.3	268.167		4.22098	0.727229	5.8042		5.56216	5.56216	1.48324	30.2582	37.3036	8.83766	51.2955
ANTARKTIS VIII/2	First-Year	26103	19890918	262	-64.38	-44.16	26103		no	0	1.225			0.295	24.0816			0.33	0.26	4.17		4.24	173.064	7.72963		0.7	0.7	0.21	2.58	3.49	0.7	5.9	252.924		4.98571	0.591525	8.42857		5.75779	5.75779	1.72734	21.2216	28.7067	5.75779	48.53
ANTARKTIS VIII/2	First-Year	26103	19890918	262	-64.38	-44.16	26103		no	0	1.225			0.3875	31.6327			0.445	0.33	4.78		5.31	326.835	1.66007		0.5	0.5	0.14	4.45	5.09	0.82	6.4	280.03		6.20732	0.795312	7.80488		3.58787	3.58787	1.0046	31.932	36.5245	5.8841	45.9247
ANTARKTIS VIII/2	First-Year	26103	19890918	262	-64.38	-44.16	26103		no	0	1.225			0.46	37.551			0.475	0.445	4.98		16.38	78.7641	2.85133		0.8	0.8	0.2	9.106	10.106	1.92	6.9	55.3045		5.26354	1.46464	3.59375		5.51004	5.51004	1.37751	62.718	69.6056	13.2241	47.5241
ANTARKTIS VIII/2	First-Year	26103	19890918	262	-64.38	-44.16	26103		no	0	1.225			0.5225	42.6531			0.57	0.475	5.11		17.55	126.087	9.32396									153.959
ANTARKTIS VIII/2	First-Year	26103	19890918	262	-64.38	-44.16	26103		no	0	1.225			0.6025	49.1837			0.635	0.57	3.81		12.12	125.414	1.06464		1.1	1.1	0.11	1.904	3.114	0.38	1.4	155.742		8.19474	2.22429	3.68421		9.90289	9.90289	0.990289	17.141	28.0342	3.421	12.6037
ANTARKTIS VIII/2	First-Year	26103	19890918	262	-64.38	-44.16	26103		no	0	1.225			0.6525	53.2653			0.67	0.635	3.96		15.59	134.235	4.70404		1.4	1.4	0.11	2.771	4.281	0.46	2.9	65.6252		9.30652	1.47621	6.30435		12.1263	12.1263	0.952778	24.0013	37.0804	3.98434	25.1187
ANTARKTIS VIII/2	First-Year	26103	19890918	262	-64.38	-44.16	26103		no	0	1.225			0.7325	59.7959			0.795	0.67	3.42		7.75	108.092										178.455
ANTARKTIS VIII/2	First-Year	26103	19890918	262	-64.38	-44.16	26103		no	0	1.225			0.8475	69.1837			0.9	0.795	6.24		6.58	44.8776	8.70543		3.6	3.6	0.18	2.827	6.607	0.61	7.6	88.7564		10.8311	0.869342	12.459		19.7885	19.7885	0.989423	15.5394	36.3173	3.35304	41.7756
ANTARKTIS VIII/2	First-Year	26103	19890918	262	-64.38	-44.16	26103		no	0	1.225			0.96	78.3673			1.02	0.9	3.92		6.13	52.3385	1.59767		2.7	2.7	0.18	1.491	4.371	0.47	5.3	98.8934		9.3	0.824717	11.2766		23.625	23.625	1.575	13.0463	38.2462	4.1125	46.375
ANTARKTIS VIII/2	First-Year	26103	19890918	262	-64.38	-44.16	26103		no	0	1.225			1.08	88.1633			1.14	1.02	3.2		4.94	46.9572			2.4	2.4	0.13	1.565	4.095	0.23	4.8	94.422		17.8043	0.853125	20.8696		25.725	25.725	1.39344	16.7748	43.8933	2.46531	51.45
ANTARKTIS VIII/2	First-Year	26103	19890918	262	-64.38	-44.16	26103		no	0	1.225			1.1825	96.5306			1.225	1.14	3.45		13.98											98.5765
ANTARKTIS VIII/2	First-Year	26105	19890918	262	-64.38	-44.16	26105		no	1	1.24			0.0625	5.04032			0.125	0	10.5		1.55	102.272	6.45908		8.4	8.4	0.24	6.195	14.835	1.89	10.1	307.026		7.84921	1.46881	5.34392		27.44	27.44	0.784	20.237	48.461	6.174	32.9933
ANTARKTIS VIII/2	First-Year	26105	19890918	262	-64.38	-44.16	26105		no	0	1.24			0.1725	13.9113			0.22	0.125	3.86		6	100.451	6.80827		1	1	0.17	2.089	3.259	0.64	2.3	64.0558		5.09219	1.41696	3.59375		8.88601	8.88601	1.51062	18.5629	28.9595	5.68705	20.4378
ANTARKTIS VIII/2	First-Year	26105	19890918	262	-64.38	-44.16	26105		no	0	1.24			0.245	19.7581			0.27	0.22	4.92		3.57				0.9	0.9	0.22	3.709	4.829	1.27	8.2			3.80236	0.588902	6.45669		6.27439	6.27439	1.53374	25.8575	33.6656	8.85386	57.1667
ANTARKTIS VIII/2	First-Year	26105	19890918	262	-64.38	-44.16	26105		no	0	1.24			0.295	23.7903			0.32	0.27	3.56		2.89	267.99	3.5659		0.8	0.8	0.25	2.762	3.812	0.8	5.9	146.537		4.765	0.646102	7.375		7.70787	7.70787	2.40871	26.6114	36.728	7.70787	56.8455
ANTARKTIS VIII/2	First-Year	26105	19890918	262	-64.38	-44.16	26105		no	0	1.24			0.35	28.2258			0.38	0.32	3.57		4.06	217.369	1.4253		0.6	0.6	0.2	3.016	3.816	0.72	5.9	133.388		5.3	0.64678	8.19444		5.76471	5.76471	1.92157	28.9773	36.6635	6.91765	56.6863
ANTARKTIS VIII/2	First-Year	26105	19890918	262	-64.38	-44.16	26105		no	0	1.24			0.4	32.2581			0.42	0.38	4.03		4.76	214.97	2.81706		0.8	0.8	0.23	4.029	5.059	0.81	7	134.221		6.24568	0.722714	8.64198		6.80893	6.80893	1.95757	34.2915	43.058	6.89404	59.5782
ANTARKTIS VIII/2	First-Year	26105	19890918	262	-64.38	-44.16	26105		no	0	1.24			0.4625	37.2984			0.505	0.42	4.48		15.04				1.1	1.1	0.32	7.401	8.821	1.28	7			6.89141	1.26014	5.46875		8.42187	8.42187	2.45	56.6639	67.5358	9.8	53.5937
ANTARKTIS VIII/2	First-Year	26105	19890918	262	-64.38	-44.16	26105		no	0	1.24			0.5475	44.1532			0.59	0.505	3.67		33.84	183.887	0.629046									80.8463
ANTARKTIS VIII/2	First-Year	26105	19890918	262	-64.38	-44.16	26105		no	0	1.24			0.62	50			0.65	0.59	2.92		15.79	258.173	12.4798		0.8	0.8	0.12	2.324	3.244	0.51	2.1	71.1406		6.36078	1.54476	4.11765		9.39726	9.39726	1.40959	27.299	38.1059	5.99075	24.6678
ANTARKTIS VIII/2	First-Year	26105	19890918	262	-64.38	-44.16	26105		no	0	1.24			0.665	53.629			0.68	0.65	2.83		13.9	131.693	12.3373		1.5	1.5	0.21	3.145	4.855	0.55	2.1	81.4739		8.82727	2.3119	3.81818		18.1802	18.1802	2.54523	38.1178	58.8433	6.66608	25.4523
ANTARKTIS VIII/2	First-Year	26105	19890918	262	-64.38	-44.16	26105		no	0	1.24			0.7275	58.6694			0.775	0.68	3.7		7.82	138.508	7.44905									35.7797
ANTARKTIS VIII/2	First-Year	26105	19890918	262	-64.38	-44.16	26105		no	0	1.24			0.825	66.5323			0.875	0.775	3.65		5.34	200.643			2	2	0.09	1.364	3.454	0.32	3.2	56.7097		10.7937	1.07937	10		18.7945	18.7945	0.845753	12.8179	32.4581	3.00712	30.0712
ANTARKTIS VIII/2	First-Year	26105	19890918	262	-64.38	-44.16	26105		no	0	1.24			0.9125	73.5887			0.95	0.875	3.98		5.07	55.5772	5.48933		2.8	2.8	0.18	2.18	5.16	0.39	4.3	78.2841		13.2308	1.2	11.0256		24.1307	24.1307	1.55126	18.7874	44.4693	3.36106	37.0578
ANTARKTIS VIII/2	First-Year	26105	19890918	262	-64.38	-44.16	26105		no	0	1.24			0.995	80.2419			1.04	0.95	2.92		9.76	71.555	14.5768		2.8	2.8	0.18	1.779	4.759	0.45	4.3	45.828		10.5756	1.10674	9.55556		32.8904	32.8904	2.11438	20.8972	55.902	5.28596	50.5103
ANTARKTIS VIII/2	First-Year	26105	19890918	262	-64.38	-44.16	26105		no	0	1.24			1.09	87.9032			1.14	1.04	2.58		6.49	81.5551	2.75011		2.8	2.8	0.19	1.412	4.402	0.4	4.3	33.0094		11.005	1.02372	10.75		37.2248	37.2248	2.52597	18.7719	58.5227	5.31783	57.1667
ANTARKTIS VIII/2	First-Year	26105	19890918	262	-64.38	-44.16	26105		no	0	1.24			1.19	95.9677			1.24	1.14	2.75		3.92	33.9556	3.16055		2.9	2.9	0.15	1.383	4.433	0.29	3.8	44.8408		15.2862	1.16658	13.1034		36.1709	36.1709	1.87091	17.2498	55.2916	3.61709	47.3964
ANTARKTIS VIII/2	First-Year	26501	19890922	266	-65.25	-40.19	26501		no	1	0.96			0.03	3.125			0.06	0	19.4		8.91	373.973	1.84324		2.6	2.6	0.42	4.715	7.735	0.23	13	128.72		33.6304	0.595	56.5217		4.59691	4.59691	0.742577	8.33631	13.6758	0.406649	22.9845
ANTARKTIS VIII/2	First-Year	26501	19890922	266	-65.25	-40.19	26501		no	0	0.96			0.115	11.9792			0.17	0.06	4.22		2.92	164.484	3.38763		0.9	0.9	0.26	2.764	3.924	0.05	6.1	153.625		78.48	0.643279	122		7.31517	7.31517	2.11327	22.4657	31.8941	0.406398	49.5806
ANTARKTIS VIII/2	First-Year	26501	19890922	266	-65.25	-40.19	26501		no	0	0.96			0.225	23.4375			0.28	0.17	4.45		3.93	99.7124	6.90265		3.1	3.1	0.12	2.789	6.009	0	2.8	81.2475			2.14607			23.8944	23.8944	0.924944	21.4972	46.3166	0	21.582
ANTARKTIS VIII/2	First-Year	26501	19890922	266	-65.25	-40.19	26501		no	0	0.96			0.33	34.375			0.38	0.28	5.89		6.69	92.5787	8.47575		1.2	1.2	0.12	1.774	3.094	0.11	5.8	86.6422		28.1273	0.533448	52.7273		6.98812	6.98812	0.698812	10.3308	18.0177	0.640577	33.7759
ANTARKTIS VIII/2	First-Year	26501	19890922	266	-65.25	-40.19	26501		no	0	0.96			0.44	45.8333			0.5	0.38	4.57		7.76	116.921			3	3	0.21	3.203	6.413	0.31	6.4	68.7729		20.6871	1.00203	20.6452		22.5164	22.5164	1.57615	24.04	48.1326	2.3267	48.035
ANTARKTIS VIII/2	First-Year	26501	19890922	266	-65.25	-40.19	26501		no	0	0.96			0.555	57.8125			0.61	0.5	4.19		1.86	76.4401	1.28825		2	2	0.17	1.876	4.046	0.03	3.8	62.9453		134.867	1.06474	126.667		16.3723	16.3723	1.39165	15.3572	33.1212	0.245585	31.1074
ANTARKTIS VIII/2	First-Year	26501	19890922	266	-65.25	-40.19	26501		no	0	0.96			0.665	69.2708			0.72	0.61	3.12		1.99	73.6579	13.1244		1.2	1.2	0.19	2.074	3.464	0.03	3.9	58.679		115.467	0.888205	130		13.1923	13.1923	2.08878	22.8007	38.0818	0.329808	42.875
ANTARKTIS VIII/2	First-Year	26501	19890922	266	-65.25	-40.19	26501		no	0	0.96			0.775	80.7292			0.83	0.72	3.61		4.2				1.2	1.2	0.17	1.68	3.05	0.02	3.8	55.1862		152.5	0.802632	190		11.4017	11.4017	1.61524	15.9623	28.9792	0.190028	36.1053
ANTARKTIS VIII/2	First-Year	26501	19890922	266	-65.25	-40.19	26501		no	0	0.96			0.895	93.2292			0.96	0.83	3.16		2.28				0.9	0.9	0.28	2.783	3.963	0.06	3.8	20.8232		66.05	1.04289	63.3333		9.76899	9.76899	3.03924	30.2079	43.0161	0.651266	41.2468
ANTARKTIS VIII/2	First-Year	27202	19891004	278	-68.23	-18.45	27202		no	1	0.6			0.0225	3.75			0.045	0	13.5		0.1				11.5	11.5	0.63	7.033	19.163	0.09	9.4	113.069		212.922	2.03862	104.444		29.2185	29.2185	1.60067	17.869	48.6882	0.228667	23.883
ANTARKTIS VIII/2	First-Year	27202	19891004	278	-68.23	-18.45	27202		no	0	0.6			0.0575	9.58333			0.07	0.045	4.8		0.02				4.8	4.8	0.27	2.201	7.271	0.09	5.4	99.3852		80.7889	1.34648	60		34.3	34.3	1.92937	15.728	51.9574	0.643125	38.5875
ANTARKTIS VIII/2	First-Year	27202	19891004	278	-68.23	-18.45	27202		no	0	0.6			0.09	15			0.11	0.07	4.52		0.04	142.874	9.24823		3.4	3.4	0.15	2.171	5.721	0.05	4.7	54.8088		114.42	1.21723	94		25.8009	25.8009	1.13827	16.4746	43.4138	0.379425	35.6659
ANTARKTIS VIII/2	First-Year	27202	19891004	278	-68.23	-18.45	27202		no	0	0.6			0.165	27.5			0.22	0.11	5.94		0.05	96.5131	5.57265		12.1	12.1	0.33	7.712	20.142	0.09	6.9	41.7503		223.8	2.91913	76.6667		69.8704	69.8704	1.90556	44.5323	116.308	0.519697	39.8434
ANTARKTIS VIII/2	First-Year	27202	19891004	278	-68.23	-18.45	27202		no	0	0.6			0.275	45.8333			0.33	0.22	5.92		0.17	122.601			4.2	4.2	0.26	3.016	7.476	0	5.4	198.286			1.38444			24.3345	24.3345	1.50642	17.4745	43.3153	0	31.2872
ANTARKTIS VIII/2	First-Year	27202	19891004	278	-68.23	-18.45	27202		no	0	0.6			0.385	64.1667			0.44	0.33	6.2		0.26	102.02	5.761		1.4	1.4	0.24	2.774	4.414	0	4.7	189.748			0.939149			7.74516	7.74516	1.32774	15.3465	24.4194	0	26.0016
ANTARKTIS VIII/2	First-Year	27202	19891004	278	-68.23	-18.45	27202		no	0	0.6			0.505	84.1667			0.57	0.44	5.11		0.79				1.4	1.4	0.26	3.075	4.735	0.07	4	54.5319		67.6429	1.18375	57.1429		9.39726	9.39726	1.74521	20.6404	31.7829	0.469863	26.8493
ANTARKTIS VIII/2	First-Year	27202	19891004	278	-68.23	-18.45	27202		no	0	0.6			0.585	97.5			0.6	0.57	12.8		12.79									0.07													0.187578
ANTARKTIS X/3	Young-Ice	21/453	19920427	118	-68.0003	-12.0692	103 118 01	In his calculations Gerhard Dieckmann considered a diameter of 7.5cm. The corer diameter is not given in the cruise report. NO3, NO2, NH4, PO4 and Si are measurements from David Thomas.	no	1	0.3			0.05	16.6667			0.1	0	14.71		0.678083				8.07	8.07	0.15	0.34	8.56	0.46	19.09			18.6087	0.448402	41.5		18.8172	18.8172	0.349762	0.792794	19.9598	1.0726	44.5131
ANTARKTIS X/3	Young-Ice	21/453	19920427	118	-68.0003	-12.0692	103 118 01	In his calculations Gerhard Dieckmann considered a diameter of 7.5cm. The corer diameter is not given in the cruise report. NO3, NO2, NH4, PO4 and Si are measurements from David Thomas.	no	0	0.3			0.15	50			0.2	0.1	5.36		16.519				2.4	2.4	0.07	1	3.47	0.32	10.32			10.8437	0.33624	32.25		15.3582	15.3582	0.447948	6.39925	22.2054	2.04776	66.0403
ANTARKTIS X/3	Young-Ice	21/453	19920427	118	-68.0003	-12.0692	103 118 01	In his calculations Gerhard Dieckmann considered a diameter of 7.5cm. The corer diameter is not given in the cruise report. NO3, NO2, NH4, PO4 and Si are measurements from David Thomas.	no	0	0.3			0.25	83.3333			0.3	0.2	7.24		5.79375				1	1	0.06	0	1.06	0.51	4.08			2.07843	0.259804	8		4.73757	4.73757	0.284254	0	5.02182	2.41616	19.3293
ANTARKTIS X/3	First-Year	21/453	19920427	118	-68.0014	-12.1167	103 119 01	In his calculations Gerhard Dieckmann considered a diameter of 7.5cm. The corer diameter is not given in the cruise report. NO3, NO2, NH4, PO4 and Si are measurements from David Thomas.	no	1	0.72			0.05	6.94444			0.1	0	12.5		6.1
ANTARKTIS X/3	First-Year	21/453	19920427	118	-68.0014	-12.1167	103 119 01	In his calculations Gerhard Dieckmann considered a diameter of 7.5cm. The corer diameter is not given in the cruise report. NO3, NO2, NH4, PO4 and Si are measurements from David Thomas.	no	0	0.72			0.15	20.8333			0.2	0.1	11.4		5.2
ANTARKTIS X/3	First-Year	21/453	19920427	118	-68.0014	-12.1167	103 119 01	In his calculations Gerhard Dieckmann considered a diameter of 7.5cm. The corer diameter is not given in the cruise report. NO3, NO2, NH4, PO4 and Si are measurements from David Thomas.	no	0	0.72			0.25	34.7222			0.3	0.2	14.7		2.2				8.49	8.49	0.11	0.58	9.18	0.58	21.34			15.8276	0.430178	36.7931		19.81	19.81	0.256667	1.35333	21.42	1.35333	49.7933
ANTARKTIS X/3	First-Year	21/453	19920427	118	-68.0014	-12.1167	103 119 01	In his calculations Gerhard Dieckmann considered a diameter of 7.5cm. The corer diameter is not given in the cruise report. NO3, NO2, NH4, PO4 and Si are measurements from David Thomas.	no	0	0.72			0.35	48.6111			0.4	0.3	7.1		3.6				1.47	1.47	0.02	0.51	2	0.3	8.35			6.66667	0.239521	27.8333		7.10155	7.10155	0.0966197	2.4638	9.66197	1.4493	40.3387
ANTARKTIS X/3	First-Year	21/453	19920427	118	-68.0014	-12.1167	103 119 01	In his calculations Gerhard Dieckmann considered a diameter of 7.5cm. The corer diameter is not given in the cruise report. NO3, NO2, NH4, PO4 and Si are measurements from David Thomas.	no	0	0.72			0.45	62.5			0.5	0.4	8.91		2.8				1.2	1.2	0.03	0.18	1.41	0.42	6.92			3.35714	0.203757	16.4762		4.61953	4.61953	0.115488	0.692929	5.42795	1.61684	26.6393
ANTARKTIS X/3	First-Year	21/453	19920427	118	-68.0014	-12.1167	103 119 01	In his calculations Gerhard Dieckmann considered a diameter of 7.5cm. The corer diameter is not given in the cruise report. NO3, NO2, NH4, PO4 and Si are measurements from David Thomas.	no	0	0.72			0.55	76.3889			0.6	0.5	8.74		4.8				0.97	0.97	0	1.04	2.01	0.39	2.73			5.15385	0.736264	7		3.80675	3.80675	0	4.08146	7.88822	1.53055	10.7138
ANTARKTIS X/3	First-Year	21/453	19920427	118	-68.0014	-12.1167	103 119 01	In his calculations Gerhard Dieckmann considered a diameter of 7.5cm. The corer diameter is not given in the cruise report. NO3, NO2, NH4, PO4 and Si are measurements from David Thomas.	no	0	0.72			0.66	91.6667			0.72	0.6	10.2		5.6				4.6	4.6	0.1	0.45	5.15	0.91	8.95			5.65934	0.575419	9.83516		15.4686	15.4686	0.336275	1.51324	17.3181	3.0601	30.0966
ANTARKTIS X/3	First-Year	21/458	19920428	119	-69.1358	-12.2014	103 120 03	In his calculations Gerhard Dieckmann considered a diameter of 7.5cm. The corer diameter is not given in the cruise report. NO3, NO2, NH4, PO4 and Si are measurements from David Thomas.	no	1	0.48			0.05	10.4167			0.1	0	8.89		1.63668				6.06	6.06	0.1	0.14	6.3	0.48	14.09			13.125	0.447126	29.3542		23.3811	23.3811	0.385827	0.540157	24.3071	1.85197	54.363
ANTARKTIS X/3	First-Year	21/458	19920428	119	-69.1358	-12.2014	103 120 03	In his calculations Gerhard Dieckmann considered a diameter of 7.5cm. The corer diameter is not given in the cruise report. NO3, NO2, NH4, PO4 and Si are measurements from David Thomas.	no	0	0.48			0.15	31.25			0.2	0.1	7.38		1.97534				4.6	4.6	0.02	0.07	4.69	0.28	11.23			16.75	0.417631	40.1071		21.3794	21.3794	0.0929539	0.325339	21.7977	1.30136	52.1936
ANTARKTIS X/3	First-Year	21/458	19920428	119	-69.1358	-12.2014	103 120 03	In his calculations Gerhard Dieckmann considered a diameter of 7.5cm. The corer diameter is not given in the cruise report. NO3, NO2, NH4, PO4 and Si are measurements from David Thomas.	no	0	0.48			0.25	52.0833			0.3	0.2	8.4		3.17193				2.8	2.8	0.02	0.2	3.02	0.22	10.15			13.7273	0.297537	46.1364		11.4333	11.4333	0.0816667	0.816667	12.3317	0.898333	41.4458
ANTARKTIS X/3	First-Year	21/458	19920428	119	-69.1358	-12.2014	103 120 03	In his calculations Gerhard Dieckmann considered a diameter of 7.5cm. The corer diameter is not given in the cruise report. NO3, NO2, NH4, PO4 and Si are measurements from David Thomas.	no	0	0.48			0.35	72.9167			0.4	0.3	9.25		6.47261				2.13	2.13	0.03	0.14	2.3	0.2	6.4			11.5	0.359375	32		7.89827	7.89827	0.111243	0.519135	8.52865	0.741622	23.7319
ANTARKTIS X/3	First-Year	21/458	19920428	119	-69.1358	-12.2014	103 120 03	In his calculations Gerhard Dieckmann considered a diameter of 7.5cm. The corer diameter is not given in the cruise report. NO3, NO2, NH4, PO4 and Si are measurements from David Thomas.	no	0	0.48			0.44	91.6667			0.48	0.4	8.74		43.3848				3.86	3.86	0.07	0	3.93	0.81	6.05			4.85185	0.649587	7.46914		15.1485	15.1485	0.274714	0	15.4232	3.17883	23.7431
ANTARKTIS XI/3	perenial ice	29/019	19940205	36	-71.0503	-79.4167	N1303602	In his calculations Gerhard Dieckmann considered a diameter of 9.0cm. The corer diameter is not given in the cruise report. Salinity, NO3, NO2, NH4, Si, PO4 and DOC measurements from David Thomas.	no	1	1.8			0.05	2.77778			0.1	0	0.24		0.778612				0.53	0.53	0.03	0.75	1.31	0.06	0.51	128.86		21.8333	2.56863	8.5		75.7458	75.7458	4.2875	107.188	187.221	8.575	72.8875
ANTARKTIS XI/3	perenial ice	29/019	19940205	36	-71.0503	-79.4167	N1303602	In his calculations Gerhard Dieckmann considered a diameter of 9.0cm. The corer diameter is not given in the cruise report. Salinity, NO3, NO2, NH4, Si, PO4 and DOC measurements from David Thomas.	no	0	1.8			0.14	7.77778			0.18	0.1	0.36		0.643852				0.19	0.19	0.03	0.26	0.48	0.03	0.36	224.76		16	1.33333	12		18.1028	18.1028	2.85833	24.7722	45.7333	2.85833	34.3
ANTARKTIS XI/3	perenial ice	29/019	19940205	36	-71.0503	-79.4167	N1303602	In his calculations Gerhard Dieckmann considered a diameter of 9.0cm. The corer diameter is not given in the cruise report. Salinity, NO3, NO2, NH4, Si, PO4 and DOC measurements from David Thomas.	no	0	1.8			0.235	13.0556			0.29	0.18	2.29		7.50162				0.35	0.35	0.04	2.55	2.94	0.6	2.9	284.45		4.9	1.01379	4.83333		5.24236	5.24236	0.599127	38.1943	44.0358	8.9869	43.4367
ANTARKTIS XI/3	perenial ice	29/019	19940205	36	-71.0503	-79.4167	N1303602	In his calculations Gerhard Dieckmann considered a diameter of 9.0cm. The corer diameter is not given in the cruise report. Salinity, NO3, NO2, NH4, Si, PO4 and DOC measurements from David Thomas.	no	0	1.8			0.345	19.1667			0.4	0.29	0.73		2.20108				0.23	0.23	0.03	5.47	5.73	0.6	2.02	94.8		9.55	2.83663	3.36667		10.8068	10.8068	1.40959	257.015	269.232	28.1918	94.9123
ANTARKTIS XI/3	perenial ice	29/019	19940205	36	-71.0503	-79.4167	N1303602	In his calculations Gerhard Dieckmann considered a diameter of 9.0cm. The corer diameter is not given in the cruise report. Salinity, NO3, NO2, NH4, Si, PO4 and DOC measurements from David Thomas.	no	0	1.8			0.45	25			0.5	0.4	0.79		4.40215				0.63	0.63	0.03	2.72	3.38	0.64	4.84	167.21		5.28125	0.698347	7.5625		27.3532	27.3532	1.30253	118.096	146.752	27.7873	210.142
ANTARKTIS XI/3	perenial ice	29/019	19940205	36	-71.0503	-79.4167	N1303602	In his calculations Gerhard Dieckmann considered a diameter of 9.0cm. The corer diameter is not given in the cruise report. Salinity, NO3, NO2, NH4, Si, PO4 and DOC measurements from David Thomas.	no	0	1.8			0.55	30.5556			0.6	0.5	2.15		13.0867				0.18	0.18	0.03	1.72	1.93	1.03	10.7	173.81		1.87379	0.180374	10.3883		2.87163	2.87163	0.478605	27.44	30.7902	16.4321	170.702
ANTARKTIS XI/3	perenial ice	29/019	19940205	36	-71.0503	-79.4167	N1303602	In his calculations Gerhard Dieckmann considered a diameter of 9.0cm. The corer diameter is not given in the cruise report. Salinity, NO3, NO2, NH4, Si, PO4 and DOC measurements from David Thomas.	no	0	1.8			0.65	36.1111			0.7	0.6	4.37		17.1744				0.33	0.33	0.04	2.23	2.6	0.53	10.42	282.48		4.90566	0.24952	19.6604		2.59016	2.59016	0.313959	17.5032	20.4073	4.15995	81.7863
ANTARKTIS XI/3	perenial ice	29/019	19940205	36	-71.0503	-79.4167	N1303602	In his calculations Gerhard Dieckmann considered a diameter of 9.0cm. The corer diameter is not given in the cruise report. Salinity, NO3, NO2, NH4, Si, PO4 and DOC measurements from David Thomas.	no	0	1.8			0.735	40.8333			0.77	0.7	4.5		80.2269				0.17	0.17	0.04	1.47	1.68	0.65	10.69	217.46		2.58462	0.157156	16.4462		1.29578	1.29578	0.304889	11.2047	12.8053	4.95444	81.4816
ANTARKTIS XI/3	perenial ice	29/019	19940205	36	-71.0503	-79.4167	N1303602	In his calculations Gerhard Dieckmann considered a diameter of 9.0cm. The corer diameter is not given in the cruise report. Salinity, NO3, NO2, NH4, Si, PO4 and DOC measurements from David Thomas.	no	0	1.8			0.805	44.7222			0.84	0.77	4.41		67.29				0.21	0.21	0.04	3.23	3.48	1.02	9.51	231.09		3.41176	0.365931	9.32353		1.63333	1.63333	0.311111	25.1222	27.0667	7.93333	73.9667
ANTARKTIS XI/3	perenial ice	29/019	19940205	36	-71.0503	-79.4167	N1303602	In his calculations Gerhard Dieckmann considered a diameter of 9.0cm. The corer diameter is not given in the cruise report. Salinity, NO3, NO2, NH4, Si, PO4 and DOC measurements from David Thomas.	no	0	1.8			0.89	49.4444			0.94	0.84	4.85		22.0856				2.26	2.26	0.06	1.56	3.88	0.27	6.4	53.78		14.3704	0.60625	23.7037		15.9831	15.9831	0.42433	11.0326	27.44	1.90948	45.2619
ANTARKTIS XI/3	perenial ice	29/019	19940205	36	-71.0503	-79.4167	N1303602	In his calculations Gerhard Dieckmann considered a diameter of 9.0cm. The corer diameter is not given in the cruise report. Salinity, NO3, NO2, NH4, Si, PO4 and DOC measurements from David Thomas.	no	0	1.8			0.99	55			1.04	0.94	5.32		31.0696				2.4	2.4	0.06	0.59	3.05	0.49	6.2	52.98		6.22449	0.491935	12.6531		15.4737	15.4737	0.386842	3.80395	19.6645	3.15921	39.9737
ANTARKTIS XI/3	perenial ice	29/019	19940205	36	-71.0503	-79.4167	N1303602	In his calculations Gerhard Dieckmann considered a diameter of 9.0cm. The corer diameter is not given in the cruise report. Salinity, NO3, NO2, NH4, Si, PO4 and DOC measurements from David Thomas.	no	0	1.8			1.075	59.7222			1.11	1.04	5.59		72.4558				3.51	3.51	0.07	6.23	9.81	0.34	7.12	121.61		28.8529	1.37781	20.9412		21.5372	21.5372	0.429517	38.227	60.1937	2.08623	43.688
ANTARKTIS XI/3	perenial ice	29/019	19940205	36	-71.0503	-79.4167	N1303602	In his calculations Gerhard Dieckmann considered a diameter of 9.0cm. The corer diameter is not given in the cruise report. Salinity, NO3, NO2, NH4, Si, PO4 and DOC measurements from David Thomas.	no	0	1.8			1.155	64.1667			1.2	1.11	2.58													64.27
ANTARKTIS XI/3	perenial ice	29/019	19940205	36	-71.0503	-79.4167	N1303602	In his calculations Gerhard Dieckmann considered a diameter of 9.0cm. The corer diameter is not given in the cruise report. Salinity, NO3, NO2, NH4, Si, PO4 and DOC measurements from David Thomas.	no	0	1.8			1.25	69.4444			1.3	1.2	4.44		40.0686				3.12	3.12	0.04	2.52	5.68	0.53	7.58	56.53		10.717	0.74934	14.3019		24.1027	24.1027	0.309009	19.4676	43.8793	4.09437	58.5572
ANTARKTIS XI/3	perenial ice	29/019	19940205	36	-71.0503	-79.4167	N1303602	In his calculations Gerhard Dieckmann considered a diameter of 9.0cm. The corer diameter is not given in the cruise report. Salinity, NO3, NO2, NH4, Si, PO4 and DOC measurements from David Thomas.	no	0	1.8			1.35	75			1.4	1.3	4.23		17.9979				2.22	2.22	0.08	5.2	7.5	0.58	5.26	85.61		12.931	1.42586	9.06897		18.0014	18.0014	0.6487	42.1655	60.8156	4.70307	42.652
ANTARKTIS XI/3	perenial ice	29/019	19940205	36	-71.0503	-79.4167	N1303602	In his calculations Gerhard Dieckmann considered a diameter of 9.0cm. The corer diameter is not given in the cruise report. Salinity, NO3, NO2, NH4, Si, PO4 and DOC measurements from David Thomas.	no	0	1.8			1.45	80.5556			1.5	1.4	4.73		9.80751				2.14	2.14	0.08	1.3	3.52	0.59	6.21	121.48		5.9661	0.566828	10.5254		15.5184	15.5184	0.580127	9.42706	25.5256	4.27844	45.0323
ANTARKTIS XI/3	perenial ice	29/019	19940205	36	-71.0503	-79.4167	N1303602	In his calculations Gerhard Dieckmann considered a diameter of 9.0cm. The corer diameter is not given in the cruise report. Salinity, NO3, NO2, NH4, Si, PO4 and DOC measurements from David Thomas.	no	0	1.8			1.55	86.1111			1.6	1.5	3.78		8.17542				1.75	1.75	0.06	1.43	3.24	0.26	4.84	54.02		12.4615	0.669421	18.6154		15.8796	15.8796	0.544444	12.9759	29.4	2.35926	43.9185
ANTARKTIS XI/3	perenial ice	29/019	19940205	36	-71.0503	-79.4167	N1303602	In his calculations Gerhard Dieckmann considered a diameter of 9.0cm. The corer diameter is not given in the cruise report. Salinity, NO3, NO2, NH4, Si, PO4 and DOC measurements from David Thomas.	no	0	1.8			1.65	91.6667			1.7	1.6	3.17		13.0867				1.83	1.83	0.06	1.52	3.41	0.41	4.58	109.21		8.31707	0.744541	11.1707		19.8009	19.8009	0.649211	16.4467	36.8968	4.43628	49.5565
ANTARKTIS XI/3	perenial ice	29/019	19940205	36	-71.0503	-79.4167	N1303602	In his calculations Gerhard Dieckmann considered a diameter of 9.0cm. The corer diameter is not given in the cruise report. Salinity, NO3, NO2, NH4, Si, PO4 and DOC measurements from David Thomas.	no	0	1.8			1.75	97.2222			1.8	1.7	5.6		38.4365				0.24	0.24	0.03	2.25	2.52	1.45	12.44	287.13		1.73793	0.202572	8.57931		1.47	1.47	0.18375	13.7812	15.435	8.88125	76.195
ANTARKTIS XI/3	perenial ice	29/028	19940208	39	-71.0669	-76.5836	N1303902	In his calculations Gerhard Dieckmann considered a diameter of 9.0cm. The corer diameter is not given in the cruise report. Salinity, NO3, NO2, NH4, Si, PO4 and DOC measurements from David Thomas.	no	1	2.6			0.05	1.92308			0.1	0	0.64		0.0748665				0.53	0.53	0.03	2.25	2.81	0.04	1.15	40.02		70.25	2.44348	28.75		28.4047	28.4047	1.60781	120.586	150.598	2.14375	61.6328
ANTARKTIS XI/3	perenial ice	29/028	19940208	39	-71.0669	-76.5836	N1303902	In his calculations Gerhard Dieckmann considered a diameter of 9.0cm. The corer diameter is not given in the cruise report. Salinity, NO3, NO2, NH4, Si, PO4 and DOC measurements from David Thomas.	no	0	2.6			0.145	5.57692			0.19	0.1	0.33		0.209626				0.4	0.4	0.03	0.75	1.18	0.07	0.72	80.01		16.8571	1.63889	10.2857		41.5758	41.5758	3.11818	77.9545	122.648	7.27576	74.8364
ANTARKTIS XI/3	perenial ice	29/028	19940208	39	-71.0669	-76.5836	N1303902	In his calculations Gerhard Dieckmann considered a diameter of 9.0cm. The corer diameter is not given in the cruise report. Salinity, NO3, NO2, NH4, Si, PO4 and DOC measurements from David Thomas.	no	0	2.6			0.245	9.42308			0.3	0.19	0		0.284493				0.24	0.24	0.02	0.38	0.64	0.04	0.21	97.07		16	3.04762	5.25
ANTARKTIS XI/3	perenial ice	29/028	19940208	39	-71.0669	-76.5836	N1303902	In his calculations Gerhard Dieckmann considered a diameter of 9.0cm. The corer diameter is not given in the cruise report. Salinity, NO3, NO2, NH4, Si, PO4 and DOC measurements from David Thomas.	no	0	2.6			0.35	13.4615			0.4	0.3	0		0.329413				0.14	0.14	0.03	0.68	0.85	0.02	0.55	96.21		42.5	1.54545	27.5
ANTARKTIS XI/3	perenial ice	29/028	19940208	39	-71.0669	-76.5836	N1303902	In his calculations Gerhard Dieckmann considered a diameter of 9.0cm. The corer diameter is not given in the cruise report. Salinity, NO3, NO2, NH4, Si, PO4 and DOC measurements from David Thomas.	no	0	2.6			0.45	17.3077			0.5	0.4	0.21		0.17968				0.18	0.18	0.03	1.5	1.71	0.02	1.46	62.24		85.5	1.17123	73		29.4	29.4	4.9	245	279.3	3.26667	238.467
ANTARKTIS XI/3	perenial ice	29/028	19940208	39	-71.0669	-76.5836	N1303902	In his calculations Gerhard Dieckmann considered a diameter of 9.0cm. The corer diameter is not given in the cruise report. Salinity, NO3, NO2, NH4, Si, PO4 and DOC measurements from David Thomas.	no	0	2.6			0.55	21.1538			0.6	0.5	1.29		0.479146				0.27	0.27	0.05	4.2	4.52	0.04	2.69	34.55		113	1.6803	67.25		7.17907	7.17907	1.32946	111.674	120.183	1.06357	71.5248
ANTARKTIS XI/3	perenial ice	29/028	19940208	39	-71.0669	-76.5836	N1303902	In his calculations Gerhard Dieckmann considered a diameter of 9.0cm. The corer diameter is not given in the cruise report. Salinity, NO3, NO2, NH4, Si, PO4 and DOC measurements from David Thomas.	no	0	2.6			0.65	25			0.7	0.6	1.09		0.598932				0.2	0.2	0.05	1.75	2	0.06	2.09	27.16		33.3333	0.956938	34.8333		6.29358	6.29358	1.57339	55.0688	62.9358	1.88807	65.7679
ANTARKTIS XI/3	perenial ice	29/028	19940208	39	-71.0669	-76.5836	N1303902	In his calculations Gerhard Dieckmann considered a diameter of 9.0cm. The corer diameter is not given in the cruise report. Salinity, NO3, NO2, NH4, Si, PO4 and DOC measurements from David Thomas.	no	0	2.6			0.75	28.8462			0.8	0.7	0.21		0.329413				0.25	0.25	0.03	2.62	2.9	0.06	0.69	48.27		48.3333	4.2029	11.5		40.8333	40.8333	4.9	427.933	473.667	9.8	112.7
ANTARKTIS XI/3	perenial ice	29/028	19940208	39	-71.0669	-76.5836	N1303902	In his calculations Gerhard Dieckmann considered a diameter of 9.0cm. The corer diameter is not given in the cruise report. Salinity, NO3, NO2, NH4, Si, PO4 and DOC measurements from David Thomas.	no	0	2.6			0.865	33.2692			0.93	0.8	0.06		0.119786				0.21	0.21	0.04	4.32	4.57	0.14	0.39			32.6429	11.7179	2.78571		120.05	120.05	22.8667	2469.6	2612.52	80.0333	222.95
ANTARKTIS XI/3	perenial ice	29/028	19940208	39	-71.0669	-76.5836	N1303902	In his calculations Gerhard Dieckmann considered a diameter of 9.0cm. The corer diameter is not given in the cruise report. Salinity, NO3, NO2, NH4, Si, PO4 and DOC measurements from David Thomas.	no	0	2.6			0.98	37.6923			1.03	0.93	0.96		0.778612				0.21	0.21	0.03	2.25	2.49	0.09	1.57	59.52		27.6667	1.58599	17.4444		7.50312	7.50312	1.07187	80.3906	88.9656	3.21562	56.0948
ANTARKTIS XI/3	perenial ice	29/028	19940208	39	-71.0669	-76.5836	N1303902	In his calculations Gerhard Dieckmann considered a diameter of 9.0cm. The corer diameter is not given in the cruise report. Salinity, NO3, NO2, NH4, Si, PO4 and DOC measurements from David Thomas.	no	0	2.6			1.08	41.5385			1.13	1.03	0.73		0.568985				0.2	0.2	0.03	1.19	1.42	0.12	1.54	101.67		11.8333	0.922078	12.8333		9.39726	9.39726	1.40959	55.9137	66.7205	5.63836	72.3589
ANTARKTIS XI/3	perenial ice	29/028	19940208	39	-71.0669	-76.5836	N1303902	In his calculations Gerhard Dieckmann considered a diameter of 9.0cm. The corer diameter is not given in the cruise report. Salinity, NO3, NO2, NH4, Si, PO4 and DOC measurements from David Thomas.	no	0	2.6			1.18	45.3846			1.23	1.13	0.97		0.823532				0.18	0.18	0.03	1.06	1.27	0.15	2.01	73.52		8.46667	0.631841	13.4		6.36495	6.36495	1.06082	37.4825	44.9082	5.30412	71.0753
ANTARKTIS XI/3	perenial ice	29/028	19940208	39	-71.0669	-76.5836	N1303902	In his calculations Gerhard Dieckmann considered a diameter of 9.0cm. The corer diameter is not given in the cruise report. Salinity, NO3, NO2, NH4, Si, PO4 and DOC measurements from David Thomas.	no	0	2.6			1.285	49.4231			1.34	1.23	1.64		0.823532				0.24	0.24	0.03	1.75	2.02	0.11	1.79	54.38		18.3636	1.12849	16.2727		5.01951	5.01951	0.627439	36.6006	42.2476	2.30061	37.4372
ANTARKTIS XI/3	perenial ice	29/028	19940208	39	-71.0669	-76.5836	N1303902	In his calculations Gerhard Dieckmann considered a diameter of 9.0cm. The corer diameter is not given in the cruise report. Salinity, NO3, NO2, NH4, Si, PO4 and DOC measurements from David Thomas.	no	0	2.6			1.39	53.4615			1.44	1.34	2.31		1.9615				0.29	0.29	0.03	0.63	0.95	0.1	2.49	57.61		9.5	0.381526	24.9		4.30606	4.30606	0.445455	9.35455	14.1061	1.48485	36.9727
ANTARKTIS XI/3	perenial ice	29/028	19940208	39	-71.0669	-76.5836	N1303902	In his calculations Gerhard Dieckmann considered a diameter of 9.0cm. The corer diameter is not given in the cruise report. Salinity, NO3, NO2, NH4, Si, PO4 and DOC measurements from David Thomas.	no	0	2.6			1.49	57.3077			1.54	1.44	4.31		11.3797				0.49	0.49	0.03	6.75	7.27	0.29	6.83	74.83		25.069	1.06442	23.5517		3.89954	3.89954	0.238747	53.7181	57.8564	2.30789	54.3548
ANTARKTIS XI/3	perenial ice	29/028	19940208	39	-71.0669	-76.5836	N1303902	In his calculations Gerhard Dieckmann considered a diameter of 9.0cm. The corer diameter is not given in the cruise report. Salinity, NO3, NO2, NH4, Si, PO4 and DOC measurements from David Thomas.	no	0	2.6			1.59	61.1538			1.64	1.54	4.89		17.9979				0.45	0.45	0.04	3.81	4.3	0.23	6.46	139.29		18.6957	0.665635	28.087		3.15644	3.15644	0.280573	26.7245	30.1616	1.61329	45.3125
ANTARKTIS XI/3	perenial ice	29/028	19940208	39	-71.0669	-76.5836	N1303902	In his calculations Gerhard Dieckmann considered a diameter of 9.0cm. The corer diameter is not given in the cruise report. Salinity, NO3, NO2, NH4, Si, PO4 and DOC measurements from David Thomas.	no	0	2.6			1.69	65			1.74	1.64	4.74		22.0856				0.49	0.49	0.05	0.81	1.35	0.24	6.75	122.12		5.625	0.2	28.125		3.54578	3.54578	0.361814	5.86139	9.76899	1.73671	48.8449
ANTARKTIS XI/3	perenial ice	29/028	19940208	39	-71.0669	-76.5836	N1303902	In his calculations Gerhard Dieckmann considered a diameter of 9.0cm. The corer diameter is not given in the cruise report. Salinity, NO3, NO2, NH4, Si, PO4 and DOC measurements from David Thomas.	no	0	2.6			1.79	68.8462			1.84	1.74	4.59		31.0696				0.89	0.89	0.04	5.19	6.12	0.37	6.16	168.4		16.5405	0.993506	16.6486		6.65076	6.65076	0.298911	38.7837	45.7333	2.76492	46.0322
ANTARKTIS XI/3	perenial ice	29/028	19940208	39	-71.0669	-76.5836	N1303902	In his calculations Gerhard Dieckmann considered a diameter of 9.0cm. The corer diameter is not given in the cruise report. Salinity, NO3, NO2, NH4, Si, PO4 and DOC measurements from David Thomas.	no	0	2.6			1.87	71.9231			1.9	1.84	5.13		67.29				0.98	0.98	0.04	2.19	3.21	0.34	6.84	113.54		9.44118	0.469298	20.1176		6.55244	6.55244	0.267446	14.6427	21.4626	2.27329	45.7333
ANTARKTIS XI/3	perenial ice	29/028	19940208	39	-71.0669	-76.5836	N1303902	In his calculations Gerhard Dieckmann considered a diameter of 9.0cm. The corer diameter is not given in the cruise report. Salinity, NO3, NO2, NH4, Si, PO4 and DOC measurements from David Thomas.	no	0	2.6			1.95	75			2	1.9	6.6		122.676				3.8	3.8	0.05	5.19	9.04	0.76	11.48	50.74		11.8947	0.787456	15.1053		19.7485	19.7485	0.259848	26.9723	46.9806	3.9497	59.6612
ANTARKTIS XI/3	perenial ice	29/028	19940208	39	-71.0669	-76.5836	N1303902	In his calculations Gerhard Dieckmann considered a diameter of 9.0cm. The corer diameter is not given in the cruise report. Salinity, NO3, NO2, NH4, Si, PO4 and DOC measurements from David Thomas.	no	0	2.6			2.05	78.8462			2.1	2	5.83		100.935				2.42	2.42	0.12	5.19	7.73	0.99	8.81	106.18		7.80808	0.877412	8.89899		14.2377	14.2377	0.706003	30.5346	45.4784	5.82453	51.8324
ANTARKTIS XI/3	perenial ice	29/028	19940208	39	-71.0669	-76.5836	N1303902	In his calculations Gerhard Dieckmann considered a diameter of 9.0cm. The corer diameter is not given in the cruise report. Salinity, NO3, NO2, NH4, Si, PO4 and DOC measurements from David Thomas.	no	0	2.6			2.15	82.6923			2.2	2.1	5.92		82.8173				2.13	2.13	0.06	3.75	5.94	1.05	11.2	61.39		5.65714	0.530357	10.6667		12.341	12.341	0.347635	21.7272	34.4159	6.08361	64.8919
ANTARKTIS XI/3	perenial ice	29/028	19940208	39	-71.0669	-76.5836	N1303902	In his calculations Gerhard Dieckmann considered a diameter of 9.0cm. The corer diameter is not given in the cruise report. Salinity, NO3, NO2, NH4, Si, PO4 and DOC measurements from David Thomas.	no	0	2.6			2.25	86.5385			2.3	2.2	6.59		93.1639				2.15	2.15	0.06	2.38	4.59	0.94	11.61	57.48		4.88298	0.395349	12.3511		11.1904	11.1904	0.312291	12.3876	23.8903	4.89256	60.4284
ANTARKTIS XI/3	perenial ice	29/028	19940208	39	-71.0669	-76.5836	N1303902	In his calculations Gerhard Dieckmann considered a diameter of 9.0cm. The corer diameter is not given in the cruise report. Salinity, NO3, NO2, NH4, Si, PO4 and DOC measurements from David Thomas.	no	0	2.6			2.35	90.3846			2.4	2.3	5.72		23.7177				2.08	2.08	0.06	1.38	3.52	0.4	10.27	26		8.8	0.342746	25.675		12.4727	12.4727	0.35979	8.27517	21.1077	2.3986	61.5841
ANTARKTIS XI/3	perenial ice	29/028	19940208	39	-71.0669	-76.5836	N1303902	In his calculations Gerhard Dieckmann considered a diameter of 9.0cm. The corer diameter is not given in the cruise report. Salinity, NO3, NO2, NH4, Si, PO4 and DOC measurements from David Thomas.	no	0	2.6			2.45	94.2308			2.5	2.4	5.1		9.58291				1.99	1.99	0.05	3.63	5.67	0.27	9.19	31.8		21	0.616975	34.037		13.3837	13.3837	0.336275	24.4135	38.1335	1.81588	61.8073
ANTARKTIS XI/3	perenial ice	29/028	19940208	39	-71.0669	-76.5836	N1303902	In his calculations Gerhard Dieckmann considered a diameter of 9.0cm. The corer diameter is not given in the cruise report. Salinity, NO3, NO2, NH4, Si, PO4 and DOC measurements from David Thomas.	no	0	2.6			2.55	98.0769			2.6	2.5	5.99		9.83746				2.08	2.08	0.05	5.44	7.57	0.4	10.43	73.61		18.925	0.725791	26.075		11.9105	11.9105	0.286311	31.1506	43.3474	2.29048	59.7244
ANTARKTIS XI/3	perenial ice	29/039	19940212	43	-73.4353	-82.5508	N1304303	In his calculations Gerhard Dieckmann considered a diameter of 9.0cm. The corer diameter is not given in the cruise report. Salinity, NO3, NO2, NH4, Si, PO4 and DOC measurements from David Thomas.	no	1	1.78			0.05	2.80899			0.1	0	4.74		1.88664				0.99	0.99	0.05	2.91	3.95	0.36	7.61	98.86		10.9722	0.519054	21.1389		7.16392	7.16392	0.361814	21.0576	28.5833	2.60506	55.0681
ANTARKTIS XI/3	perenial ice	29/039	19940212	43	-73.4353	-82.5508	N1304303	In his calculations Gerhard Dieckmann considered a diameter of 9.0cm. The corer diameter is not given in the cruise report. Salinity, NO3, NO2, NH4, Si, PO4 and DOC measurements from David Thomas.	no	0	1.78			0.15	8.42697			0.2	0.1	8.54		4.6567				1.14	1.14	0.08	2.11	3.33	1.06	13.09	178.35		3.14151	0.254393	12.3491		4.57869	4.57869	0.321311	8.47459	13.3746	4.25738	52.5746
ANTARKTIS XI/3	perenial ice	29/039	19940212	43	-73.4353	-82.5508	N1304303	In his calculations Gerhard Dieckmann considered a diameter of 9.0cm. The corer diameter is not given in the cruise report. Salinity, NO3, NO2, NH4, Si, PO4 and DOC measurements from David Thomas.	no	0	1.78			0.25	14.0449			0.3	0.2	9.45		8.8043				0.4	0.4	0.05	0.03	0.48	0.4	15.16	217.3		1.2	0.0316623	37.9		1.45185	1.45185	0.181481	0.108889	1.74222	1.45185	55.0252
ANTARKTIS XI/3	perenial ice	29/039	19940212	43	-73.4353	-82.5508	N1304303	In his calculations Gerhard Dieckmann considered a diameter of 9.0cm. The corer diameter is not given in the cruise report. Salinity, NO3, NO2, NH4, Si, PO4 and DOC measurements from David Thomas.	no	0	1.78			0.35	19.6629			0.4	0.3	6.61		33.5252				0.47	0.47	0.07	1.76	2.3	0.45	11.61	175.43		5.11111	0.198105	25.8		2.43888	2.43888	0.363238	9.13283	11.9349	2.3351	60.2455
ANTARKTIS XI/3	perenial ice	29/039	19940212	43	-73.4353	-82.5508	N1304303	In his calculations Gerhard Dieckmann considered a diameter of 9.0cm. The corer diameter is not given in the cruise report. Salinity, NO3, NO2, NH4, Si, PO4 and DOC measurements from David Thomas.	no	0	1.78			0.45	25.2809			0.5	0.4	7.98		25.3498				1	1	0.06	2.19	3.25	0.99	15.29	136.24		3.28283	0.212557	15.4444		4.29825	4.29825	0.257895	9.41316	13.9693	4.25526	65.7202
ANTARKTIS XI/3	perenial ice	29/039	19940212	43	-73.4353	-82.5508	N1304303	In his calculations Gerhard Dieckmann considered a diameter of 9.0cm. The corer diameter is not given in the cruise report. Salinity, NO3, NO2, NH4, Si, PO4 and DOC measurements from David Thomas.	no	0	1.78			0.55	30.8989			0.6	0.5	7.7		77.6366				1.07	1.07	0.07	3.89	5.03	0.99	15.72	86.85		5.08081	0.319975	15.8788		4.76636	4.76636	0.311818	17.3282	22.4064	4.41	70.0255
ANTARKTIS XI/3	perenial ice	29/039	19940212	43	-73.4353	-82.5508	N1304303	In his calculations Gerhard Dieckmann considered a diameter of 9.0cm. The corer diameter is not given in the cruise report. Salinity, NO3, NO2, NH4, Si, PO4 and DOC measurements from David Thomas.	no	0	1.78			0.65	36.5169			0.7	0.6	5.87		33.5252				0.89	0.89	0.06	3.51	4.46	0.83	11.63	62.08		5.37349	0.383491	14.012		5.20051	5.20051	0.350596	20.5099	26.061	4.84991	67.9572
ANTARKTIS XI/3	perenial ice	29/039	19940212	43	-73.4353	-82.5508	N1304303	In his calculations Gerhard Dieckmann considered a diameter of 9.0cm. The corer diameter is not given in the cruise report. Salinity, NO3, NO2, NH4, Si, PO4 and DOC measurements from David Thomas.	no	0	1.78			0.74	41.573			0.78	0.7	6.56		18.8065											75.61
ANTARKTIS XI/3	perenial ice	29/039	19940212	43	-73.4353	-82.5508	N1304303	In his calculations Gerhard Dieckmann considered a diameter of 9.0cm. The corer diameter is not given in the cruise report. Salinity, NO3, NO2, NH4, Si, PO4 and DOC measurements from David Thomas.	no	0	1.78			0.83	46.6292			0.88	0.78	7.34		17.1744				2.7	2.7	0.08	2.26	5.04	2.57	13.69	42.13		1.96109	0.368152	5.32685		12.6172	12.6172	0.373842	10.561	23.552	12.0097	63.9737
ANTARKTIS XI/3	perenial ice	29/039	19940212	43	-73.4353	-82.5508	N1304303	In his calculations Gerhard Dieckmann considered a diameter of 9.0cm. The corer diameter is not given in the cruise report. Salinity, NO3, NO2, NH4, Si, PO4 and DOC measurements from David Thomas.	no	0	1.78			0.93	52.2472			0.98	0.88	6.32		10.8706				2.85	2.85	0.07	6.25	9.17	2.7	11.62	45.86		3.3963	0.789157	4.3037		15.4676	15.4676	0.379905	33.9201	49.7676	14.6535	63.0642
ANTARKTIS XI/3	perenial ice	29/039	19940212	43	-73.4353	-82.5508	N1304303	In his calculations Gerhard Dieckmann considered a diameter of 9.0cm. The corer diameter is not given in the cruise report. Salinity, NO3, NO2, NH4, Si, PO4 and DOC measurements from David Thomas.	no	0	1.78			1.03	57.8652			1.08	0.98	4.66		12.1583				2.22	2.22	0.06	2.98	5.26	1.9	8.84	70.76		2.76842	0.595023	4.65263		16.3403	16.3403	0.441631	21.9343	38.7163	13.985	65.067
ANTARKTIS XI/3	perenial ice	29/039	19940212	43	-73.4353	-82.5508	N1304303	In his calculations Gerhard Dieckmann considered a diameter of 9.0cm. The corer diameter is not given in the cruise report. Salinity, NO3, NO2, NH4, Si, PO4 and DOC measurements from David Thomas.	no	0	1.78			1.13	63.4831			1.18	1.08	2.87		8.02569				1.67	1.67	0.05	1.21	2.93	1.61	4.98	29.44		1.81988	0.588353	3.09317		19.9585	19.9585	0.597561	14.461	35.0171	19.2415	59.5171
ANTARKTIS XI/3	perenial ice	29/039	19940212	43	-73.4353	-82.5508	N1304303	In his calculations Gerhard Dieckmann considered a diameter of 9.0cm. The corer diameter is not given in the cruise report. Salinity, NO3, NO2, NH4, Si, PO4 and DOC measurements from David Thomas.	no	0	1.78			1.23	69.1011			1.28	1.18	2.05		5.43531				1.4	1.4	0.06	2.21	3.67	1.34	3.49	74.44		2.73881	1.05158	2.60448		23.4244	23.4244	1.0039	36.9771	61.4054	22.4205	58.3937
ANTARKTIS XI/3	perenial ice	29/039	19940212	43	-73.4353	-82.5508	N1304303	In his calculations Gerhard Dieckmann considered a diameter of 9.0cm. The corer diameter is not given in the cruise report. Salinity, NO3, NO2, NH4, Si, PO4 and DOC measurements from David Thomas.	no	0	1.78			1.33	74.7191			1.38	1.28	2.56		3.26418				1.97	1.97	0.08	11.47	13.52	1.88	5.46			7.19149	2.47619	2.90426		26.3949	26.3949	1.07187	153.68	181.147	25.1891	73.1555
ANTARKTIS XI/3	perenial ice	29/039	19940212	43	-73.4353	-82.5508	N1304303	In his calculations Gerhard Dieckmann considered a diameter of 9.0cm. The corer diameter is not given in the cruise report. Salinity, NO3, NO2, NH4, Si, PO4 and DOC measurements from David Thomas.	no	0	1.78			1.43	80.3371			1.48	1.38	2.37		3.11445				1.7	1.7	0.07	0.33	2.1	1.58	5.29	25.52		1.32911	0.396975	3.3481		24.6034	24.6034	1.01308	4.77595	30.3924	22.8667	76.5599
ANTARKTIS XI/3	perenial ice	29/039	19940212	43	-73.4353	-82.5508	N1304303	In his calculations Gerhard Dieckmann considered a diameter of 9.0cm. The corer diameter is not given in the cruise report. Salinity, NO3, NO2, NH4, Si, PO4 and DOC measurements from David Thomas.	no	0	1.78			1.53	85.9551			1.58	1.48	2.86		2.29091				1.97	1.97	0.07	3.92	5.96	1.89	6.32	34.01		3.15344	0.943038	3.34392		23.6262	23.6262	0.83951	47.0126	71.4783	22.6668	75.7958
ANTARKTIS XI/3	perenial ice	29/039	19940212	43	-73.4353	-82.5508	N1304303	In his calculations Gerhard Dieckmann considered a diameter of 9.0cm. The corer diameter is not given in the cruise report. Salinity, NO3, NO2, NH4, Si, PO4 and DOC measurements from David Thomas.	no	0	1.78			1.63	91.573			1.68	1.58	4.44		2.45562				2.47	2.47	0.07	1.48	4.02	2.41	9.36	62.16		1.66805	0.429487	3.88382		19.0813	19.0813	0.540766	11.4333	31.0554	18.6178	72.3081
ANTARKTIS XI/3	perenial ice	29/039	19940212	43	-73.4353	-82.5508	N1304303	In his calculations Gerhard Dieckmann considered a diameter of 9.0cm. The corer diameter is not given in the cruise report. Salinity, NO3, NO2, NH4, Si, PO4 and DOC measurements from David Thomas.	no	0	1.78			1.73	97.191			1.78	1.68	4.56		1.7968				2.35	2.35	0.06	0.74	3.15	2.21	8.96	29.13		1.42534	0.351562	4.0543		17.6765	17.6765	0.451316	5.56623	23.6941	16.6235	67.3965
ANTARKTIS XI/3	perenial ice	29/039	19940212	43	-73.4353	-82.5508	N1304402	In his calculations Gerhard Dieckmann considered a diameter of 9.0cm. The corer diameter is not given in the cruise report. Salinity, NO3, NO2, NH4, PO4, Si and DOC measurements are from David Thomas.	no	1	0.9			0.065	7.22222			0.13	0	4.79		0.284493				0.53	0.53	0.03	3.77	4.33	0.12	0.96	65.77		36.0833	4.51042	8		3.7952	3.7952	0.214823	26.996	31.0061	0.85929	6.87432
ANTARKTIS XI/3	perenial ice	29/039	19940212	43	-73.4353	-82.5508	N1304402	In his calculations Gerhard Dieckmann considered a diameter of 9.0cm. The corer diameter is not given in the cruise report. Salinity, NO3, NO2, NH4, PO4, Si and DOC measurements are from David Thomas.	no	0	0.9			0.16	17.7778			0.19	0.13	3.38		0.988238				0.78	0.78	0.04	4.36	5.18	0.22	3.01	169.5		23.5455	1.72093	13.6818		7.91538	7.91538	0.405917	44.245	52.5663	2.23254	30.5453
ANTARKTIS XI/3	perenial ice	29/039	19940212	43	-73.4353	-82.5508	N1304402	In his calculations Gerhard Dieckmann considered a diameter of 9.0cm. The corer diameter is not given in the cruise report. Salinity, NO3, NO2, NH4, PO4, Si and DOC measurements are from David Thomas.	no	0	0.9			0.245	27.2222			0.3	0.19	7.48		18.8065				1.42	1.42	0.07	2.46	3.95	1.1	6.11	137.04		3.59091	0.646481	5.55455		6.5115	6.5115	0.320989	11.2805	18.113	5.04412	28.0178
ANTARKTIS XI/3	perenial ice	29/039	19940212	43	-73.4353	-82.5508	N1304402	In his calculations Gerhard Dieckmann considered a diameter of 9.0cm. The corer diameter is not given in the cruise report. Salinity, NO3, NO2, NH4, PO4, Si and DOC measurements are from David Thomas.	no	0	0.9			0.35	38.8889			0.4	0.3	5.48		23.7177				2.66	2.66	0.07	3.22	5.95	1.77	6.21	193.63		3.36158	0.958132	3.50847		16.6493	16.6493	0.438139	20.1544	37.2418	11.0786	38.8692
ANTARKTIS XI/3	perenial ice	29/039	19940212	43	-73.4353	-82.5508	N1304402	In his calculations Gerhard Dieckmann considered a diameter of 9.0cm. The corer diameter is not given in the cruise report. Salinity, NO3, NO2, NH4, PO4, Si and DOC measurements are from David Thomas.	no	0	0.9			0.45	50			0.5	0.4	4.3		20.4386				1.53	1.53	0.04	9.1	10.67	1.3	7.24	192.99		8.20769	1.47376	5.56923		12.2044	12.2044	0.31907	72.5884	85.1119	10.3698	57.7516
ANTARKTIS XI/3	perenial ice	29/039	19940212	43	-73.4353	-82.5508	N1304402	In his calculations Gerhard Dieckmann considered a diameter of 9.0cm. The corer diameter is not given in the cruise report. Salinity, NO3, NO2, NH4, PO4, Si and DOC measurements are from David Thomas.	no	0	0.9			0.55	61.1111			0.6	0.5	3.91		9.05885				0.72	0.72	0.03	1.78	2.53	0.55	8.36	117.51		4.6	0.302632	15.2		6.31611	6.31611	0.263171	15.6148	22.1941	4.82481	73.3371
ANTARKTIS XI/3	perenial ice	29/039	19940212	43	-73.4353	-82.5508	N1304402	In his calculations Gerhard Dieckmann considered a diameter of 9.0cm. The corer diameter is not given in the cruise report. Salinity, NO3, NO2, NH4, PO4, Si and DOC measurements are from David Thomas.	no	0	0.9			0.65	72.2222			0.7	0.6	5.09		37.6129				0.76	0.76	0.03	3.24	4.03	2.62	20.02	184.02		1.53817	0.201299	7.64122		5.12141	5.12141	0.202161	21.8334	27.157	17.6554	134.909
ANTARKTIS XI/3	perenial ice	29/039	19940212	43	-73.4353	-82.5508	N1304402	In his calculations Gerhard Dieckmann considered a diameter of 9.0cm. The corer diameter is not given in the cruise report. Salinity, NO3, NO2, NH4, PO4, Si and DOC measurements are from David Thomas.	no	0	0.9			0.75	83.3333			0.8	0.7	3.09		35.9808				0.66	0.66	0.04	3.98	4.68	1.67	21.32	185.53		2.8024	0.219512	12.7665		7.32621	7.32621	0.444013	44.1793	51.9495	18.5375	236.659
ANTARKTIS XI/3	perenial ice	29/039	19940212	43	-73.4353	-82.5508	N1304402	In his calculations Gerhard Dieckmann considered a diameter of 9.0cm. The corer diameter is not given in the cruise report. Salinity, NO3, NO2, NH4, PO4, Si and DOC measurements are from David Thomas.	no	0	0.9			0.85	94.4444			0.9	0.8	2.9		82.8173				1.06	1.06	0.03	4.4	5.49	2.58	21.3	237.44		2.12791	0.257746	8.25581		12.5372	12.5372	0.354828	52.0414	64.9334	30.5152	251.928
ANTARKTIS XI/3	perenial ice	29/039	19940212	43	-73.4353	-82.5508	N1304403	In his calculations Gerhard Dieckmann considered a diameter of 9.0cm. The corer diameter is not given in the cruise report. All measurements are from David Thomas.	no	0	0.9			0.645	71.6667			0.7	0.59	5.62		171.46				2.1	2.1	0.11	2.96	5.17	2.8	11.18	555.53		1.84643	0.462433	3.99286		12.8167	12.8167	0.671352	18.0655	31.5536	17.089	68.2338
ANTARKTIS XI/3	perenial ice	29/039	19940212	43	-73.4353	-82.5508	N1304403	In his calculations Gerhard Dieckmann considered a diameter of 9.0cm. The corer diameter is not given in the cruise report. All measurements are from David Thomas.	no	0	0.9			0.85	94.4444			0.9	0.8	2.06		33.77				0.56	0.56	0.02	2.51	3.09	2.7	23.57	160.01		1.14444	0.131099	8.72963		9.32427	9.32427	0.33301	41.7927	51.45	44.9563	392.452
ANTARKTIS XI/3	perenial ice	29/039	19940212	42	-73.4353	-82.5508	N1304403	In his calculations Gerhard Dieckmann considered a diameter of 9.0cm. The corer diameter is not given in the cruise report. All measurements are from David Thomas.	no	1	0.9			0.645	71.6667			0.7	0.59	5.62		171.46				2.1	2.1	0.11	2.96	5.17	2.8	11.18	555.53		1.84643	2.16248	3.99286		12.8167	12.8167	0.671352	18.0655	31.5536	17.089	68.2338
ANTARKTIS XI/3	perenial ice	29/039	19940212	42	-73.4353	-82.5508	N1304403	In his calculations Gerhard Dieckmann considered a diameter of 9.0cm. The corer diameter is not given in the cruise report. All measurements are from David Thomas.	no	0	0.9			0.85	94.4444			0.9	0.8	2.06		33.77				0.56	0.56	0.02	2.51	3.09	2.7	23.57	160.01		1.14444	7.62783	8.72963		9.32427	9.32427	0.33301	41.7927	51.45	44.9563	392.452
ANTARKTIS XI/3	perenial ice	29/051	19940218	49	-70.9336	-89.3006	N1304902	In his calculations Gerhard Dieckmann considered a diameter of 9.0cm. The corer diameter is not given in the cruise report. Salinity, NO3, NO2, NH4, PO4, Si and DOC measurements are from David Thomas.	no	1	0.86			0.045	5.23256			0.09	0	3.58		1.13797				0.97	0.97	0.05	2.53	3.55	0.15	4.38			23.6667	0.810502	29.2		9.29358	9.29358	0.47905	24.2399	34.0126	1.43715	41.9648
ANTARKTIS XI/3	perenial ice	29/051	19940218	49	-70.9336	-89.3006	N1304902	In his calculations Gerhard Dieckmann considered a diameter of 9.0cm. The corer diameter is not given in the cruise report. Salinity, NO3, NO2, NH4, PO4, Si and DOC measurements are from David Thomas.	no	0	0.86			0.14	16.2791			0.19	0.09	3.12		0.359359				0.42	0.42	0.03	1.75	2.2	0.09	2.69	65.9		24.4444	0.817844	29.8889		4.61731	4.61731	0.329808	19.2388	24.1859	0.989423	29.5728
ANTARKTIS XI/3	perenial ice	29/051	19940218	49	-70.9336	-89.3006	N1304902	In his calculations Gerhard Dieckmann considered a diameter of 9.0cm. The corer diameter is not given in the cruise report. Salinity, NO3, NO2, NH4, PO4, Si and DOC measurements are from David Thomas.	no	0	0.86			0.24	27.907			0.29	0.19	5.18		3.26418				0.2	0.2	0.05	1.09	1.34	0.38	5.34	47.07		3.52632	0.250936	14.0526		1.32432	1.32432	0.331081	7.21757	8.87297	2.51622	35.3595
ANTARKTIS XI/3	perenial ice	29/051	19940218	49	-70.9336	-89.3006	N1304902	In his calculations Gerhard Dieckmann considered a diameter of 9.0cm. The corer diameter is not given in the cruise report. Salinity, NO3, NO2, NH4, PO4, Si and DOC measurements are from David Thomas.	no	0	0.86			0.34	39.5349			0.39	0.29	3.13		1.9615				0.08	0.08	0.02	1.09	1.19	0.12	2.36	123.8		9.91667	0.504237	19.6667		0.876677	0.876677	0.219169	11.9447	13.0406	1.31502	25.862
ANTARKTIS XI/3	perenial ice	29/051	19940218	49	-70.9336	-89.3006	N1304902	In his calculations Gerhard Dieckmann considered a diameter of 9.0cm. The corer diameter is not given in the cruise report. Salinity, NO3, NO2, NH4, PO4, Si and DOC measurements are from David Thomas.	no	0	0.86			0.44	51.1628			0.49	0.39	4.13		5.43531				0.39	0.39	0.03	3.67	4.09	0.11	3.28	59.79		37.1818	1.24695	29.8182		3.23898	3.23898	0.249153	30.4797	33.9678	0.913559	27.2407
ANTARKTIS XI/3	perenial ice	29/051	19940218	49	-70.9336	-89.3006	N1304902	In his calculations Gerhard Dieckmann considered a diameter of 9.0cm. The corer diameter is not given in the cruise report. Salinity, NO3, NO2, NH4, PO4, Si and DOC measurements are from David Thomas.	no	0	0.86			0.54	62.7907			0.59	0.49	5		5.68985				0.15	0.15	0.03	1.05	1.23	0.12	3.79	74.53		10.25	0.324538	31.5833		1.029	1.029	0.2058	7.203	8.4378	0.8232	25.9994
ANTARKTIS XI/3	perenial ice	29/051	19940218	49	-70.9336	-89.3006	N1304902	In his calculations Gerhard Dieckmann considered a diameter of 9.0cm. The corer diameter is not given in the cruise report. Salinity, NO3, NO2, NH4, PO4, Si and DOC measurements are from David Thomas.	no	0	0.86			0.64	74.4186			0.69	0.59	5.8		14.7188				0.78	0.78	0.04	4.17	4.99	0.31	7.85	197.88		16.0968	0.635669	25.3226		4.61276	4.61276	0.236552	24.6605	29.5098	1.83328	46.4233
ANTARKTIS XI/3	perenial ice	29/051	19940218	49	-70.9336	-89.3006	N1304902	In his calculations Gerhard Dieckmann considered a diameter of 9.0cm. The corer diameter is not given in the cruise report. Salinity, NO3, NO2, NH4, PO4, Si and DOC measurements are from David Thomas.	no	0	0.86			0.725	84.3023			0.76	0.69	5.52		156.441				3.17	3.17	0.09	4.4	7.66	3.25	18.47	410.99		2.35692	0.414727	5.68308		19.6976	19.6976	0.559239	27.3406	47.5975	20.1947	114.768
ANTARKTIS XI/3	perenial ice	29/051	19940218	49	-70.9336	-89.3006	N1304902	In his calculations Gerhard Dieckmann considered a diameter of 9.0cm. The corer diameter is not given in the cruise report. Salinity, NO3, NO2, NH4, PO4, Si and DOC measurements are from David Thomas.	no	0	0.86			0.81	94.186			0.86	0.76	5.75		361.47				3.7	3.7	0.44	3.41	7.55	1.35	17.29	375.15		5.59259	0.436669	12.8074		22.0713	22.0713	2.6247	20.3414	45.0374	8.05304	103.139
ANTARKTIS XI/3	perenial ice	29/054	19940222	53	-71.785	-105.151	N1305302	In his calculations Gerhard Dieckmann considered a diameter of 9.0cm. The corer diameter is not given in the cruise report. Salinity, NO3, NO2, NH4, PO4, Si and DOC measurements are from David Thomas.	no	1	2.51			0.05	1.99203			0.1	0	1.84		0.464172				2.61	2.61	0.09	5.95	8.65	0.1	1.13	56.7		86.5	7.65487	11.3		48.6538	48.6538	1.67772	110.916	161.247	1.86413	21.0647
ANTARKTIS XI/3	perenial ice	29/054	19940222	53	-71.785	-105.151	N1305302	In his calculations Gerhard Dieckmann considered a diameter of 9.0cm. The corer diameter is not given in the cruise report. Salinity, NO3, NO2, NH4, PO4, Si and DOC measurements are from David Thomas.	no	0	2.51			0.15	5.9761			0.2	0.1	6.52		1.63209				1.62	1.62	0.08	2.29	3.99	0.17	2.83	56.16		23.4706	1.40989	16.6471		8.52239	8.52239	0.420859	12.0471	20.9903	0.894325	14.8879
ANTARKTIS XI/3	perenial ice	29/054	19940222	53	-71.785	-105.151	N1305302	In his calculations Gerhard Dieckmann considered a diameter of 9.0cm. The corer diameter is not given in the cruise report. Salinity, NO3, NO2, NH4, PO4, Si and DOC measurements are from David Thomas.	no	0	2.51			0.29	11.5538			0.38	0.2	9.06		4.40215				1.87	1.87	0.07	3.91	5.85	0.13	3.57	65.68		45	1.63866	27.4615		7.07958	7.07958	0.265011	14.8028	22.1474	0.492163	13.5156
ANTARKTIS XI/3	perenial ice	29/054	19940222	53	-71.785	-105.151	N1305302	In his calculations Gerhard Dieckmann considered a diameter of 9.0cm. The corer diameter is not given in the cruise report. Salinity, NO3, NO2, NH4, PO4, Si and DOC measurements are from David Thomas.	no	0	2.51			0.43	17.1315			0.48	0.38	5.87		17.9979				1.86	1.86	0.07	3.87	5.8	0.76	1.91	100.17		7.63158	3.03665	2.51316		10.8685	10.8685	0.409029	22.6135	33.891	4.44089	11.1606
ANTARKTIS XI/3	perenial ice	29/054	19940222	53	-71.785	-105.151	N1305302	In his calculations Gerhard Dieckmann considered a diameter of 9.0cm. The corer diameter is not given in the cruise report. Salinity, NO3, NO2, NH4, PO4, Si and DOC measurements are from David Thomas.	no	0	2.51			0.53	21.1155			0.58	0.48	6.54		20.4386				0.95	0.95	0.07	1.6	2.62	0.16	2.2	78.36		16.375	1.19091	13.75		4.98242	4.98242	0.367125	8.39144	13.741	0.839144	11.5382
ANTARKTIS XI/3	perenial ice	29/054	19940222	53	-71.785	-105.151	N1305302	In his calculations Gerhard Dieckmann considered a diameter of 9.0cm. The corer diameter is not given in the cruise report. Salinity, NO3, NO2, NH4, PO4, Si and DOC measurements are from David Thomas.	no	0	2.51			0.63	25.0996			0.68	0.58	2.44		13.8952				1.4	1.4	0.05	2.86	4.31	0.22	1.69	92.03		19.5909	2.5503	7.68182		19.6803	19.6803	0.702869	40.2041	60.5873	3.09262	23.757
ANTARKTIS XI/3	perenial ice	29/054	19940222	53	-71.785	-105.151	N1305302	In his calculations Gerhard Dieckmann considered a diameter of 9.0cm. The corer diameter is not given in the cruise report. Salinity, NO3, NO2, NH4, PO4, Si and DOC measurements are from David Thomas.	no	0	2.51			0.73	29.0837			0.78	0.68	2.78		11.4546				0.64	0.64	0.05	1.28	1.97	0.15	1.72	89.51		13.1333	1.14535	11.4667		7.8964	7.8964	0.616906	15.7928	24.3061	1.85072	21.2216
ANTARKTIS XI/3	perenial ice	29/054	19940222	53	-71.785	-105.151	N1305302	In his calculations Gerhard Dieckmann considered a diameter of 9.0cm. The corer diameter is not given in the cruise report. Salinity, NO3, NO2, NH4, PO4, Si and DOC measurements are from David Thomas.	no	0	2.51			0.83	33.0677			0.88	0.78	3.11		11.9038				0.51	0.51	0.05	1.18	1.74	0.18	1.23	59.8		9.66667	1.41463	6.83333		5.62476	5.62476	0.551447	13.0141	19.1904	1.98521	13.5656
ANTARKTIS XI/3	perenial ice	29/054	19940222	53	-71.785	-105.151	N1305302	In his calculations Gerhard Dieckmann considered a diameter of 9.0cm. The corer diameter is not given in the cruise report. Salinity, NO3, NO2, NH4, PO4, Si and DOC measurements are from David Thomas.	no	0	2.51			0.93	37.0518			0.98	0.88	4		7.77114				1.18	1.18	0.05	1.97	3.2	0.17	1.96	27.08		18.8235	1.63265	11.5294		10.1185	10.1185	0.42875	16.8927	27.44	1.45775	16.807
ANTARKTIS XI/3	perenial ice	29/054	19940222	53	-71.785	-105.151	N1305302	In his calculations Gerhard Dieckmann considered a diameter of 9.0cm. The corer diameter is not given in the cruise report. Salinity, NO3, NO2, NH4, PO4, Si and DOC measurements are from David Thomas.	no	0	2.51			1.03	41.0359			1.08	0.98	5.4		8.28023				0.95	0.95	0.06	1.01	2.02	0.1	2.56	50.07		20.2	0.789062	25.6		6.03426	6.03426	0.381111	6.41537	12.8307	0.635185	16.2607
ANTARKTIS XI/3	perenial ice	29/054	19940222	53	-71.785	-105.151	N1305302	In his calculations Gerhard Dieckmann considered a diameter of 9.0cm. The corer diameter is not given in the cruise report. Salinity, NO3, NO2, NH4, PO4, Si and DOC measurements are from David Thomas.	no	0	2.51			1.13	45.0199			1.18	1.08	4.41		8.28023				0.98	0.98	0.07	1.36	2.41	0.14	2.34	16.09		17.2143	1.02991	16.7143		7.62222	7.62222	0.544444	10.5778	18.7444	1.08889	18.2
ANTARKTIS XI/3	perenial ice	29/054	19940222	53	-71.785	-105.151	N1305302	In his calculations Gerhard Dieckmann considered a diameter of 9.0cm. The corer diameter is not given in the cruise report. Salinity, NO3, NO2, NH4, PO4, Si and DOC measurements are from David Thomas.	no	0	2.51			1.23	49.004			1.28	1.18	3.41		13.0867				0.86	0.86	0.05	2.43	3.34	0.2	1.15	37.96		16.7	2.90435	5.75		8.65044	8.65044	0.502933	24.4425	33.5959	2.01173	11.5674
ANTARKTIS XI/3	perenial ice	29/054	19940222	53	-71.785	-105.151	N1305302	In his calculations Gerhard Dieckmann considered a diameter of 9.0cm. The corer diameter is not given in the cruise report. Salinity, NO3, NO2, NH4, PO4, Si and DOC measurements are from David Thomas.	no	0	2.51			1.33	52.988			1.38	1.28	3.68		10.092				0.93	0.93	0.06	2.06	3.05	0.2	1.29	43.83		15.25	2.36434	6.45		8.66821	8.66821	0.559239	19.2005	28.428	1.86413	12.0236
ANTARKTIS XI/3	perenial ice	29/054	19940222	53	-71.785	-105.151	N1305302	In his calculations Gerhard Dieckmann considered a diameter of 9.0cm. The corer diameter is not given in the cruise report. Salinity, NO3, NO2, NH4, PO4, Si and DOC measurements are from David Thomas.	no	0	2.51			1.43	56.9721			1.48	1.38	4.26		11.9038				0.73	0.73	0.05	1.89	2.67	0.1	1.32	21.19		26.7	2.02273	13.2		5.8777	5.8777	0.402582	15.2176	21.4979	0.805164	10.6282
ANTARKTIS XI/3	perenial ice	29/054	19940222	53	-71.785	-105.151	N1305302	In his calculations Gerhard Dieckmann considered a diameter of 9.0cm. The corer diameter is not given in the cruise report. Salinity, NO3, NO2, NH4, PO4, Si and DOC measurements are from David Thomas.	no	0	2.51			1.53	60.9562			1.58	1.48	2.97		6.99253				0.59	0.59	0.06	0.99	1.64	0.1	0.88	45.05		16.4	1.86364	8.8		6.8138	6.8138	0.692929	11.4333	18.9401	1.15488	10.163
ANTARKTIS XI/3	perenial ice	29/054	19940222	53	-71.785	-105.151	N1305302	In his calculations Gerhard Dieckmann considered a diameter of 9.0cm. The corer diameter is not given in the cruise report. Salinity, NO3, NO2, NH4, PO4, Si and DOC measurements are from David Thomas.	no	0	2.51			1.63	64.9402			1.68	1.58	2.9		6.21392				0.65	0.65	0.05	2.83	3.53	0.12	0.83	34.3		29.4167	4.25301	6.91667		7.68793	7.68793	0.591379	33.4721	41.7514	1.41931	9.8169
ANTARKTIS XI/3	perenial ice	29/054	19940222	53	-71.785	-105.151	N1305302	In his calculations Gerhard Dieckmann considered a diameter of 9.0cm. The corer diameter is not given in the cruise report. Salinity, NO3, NO2, NH4, PO4, Si and DOC measurements are from David Thomas.	no	0	2.51			1.73	68.9243			1.78	1.68	3.09		6.46847				0.68	0.68	0.05	1.58	2.31	0.1	1.06	27.94		23.1	2.17925	10.6		7.54822	7.54822	0.555016	17.5385	25.6417	1.11003	11.7663
ANTARKTIS XI/3	perenial ice	29/054	19940222	53	-71.785	-105.151	N1305302	In his calculations Gerhard Dieckmann considered a diameter of 9.0cm. The corer diameter is not given in the cruise report. Salinity, NO3, NO2, NH4, PO4, Si and DOC measurements are from David Thomas.	no	0	2.51			1.83	72.9084			1.88	1.78	3.37		7.77114				0.98	0.98	0.05	3.3	4.33	0.13	1.55	52.25		33.3077	2.79355	11.9231		9.97448	9.97448	0.508902	33.5875	44.0709	1.32315	15.776
ANTARKTIS XI/3	perenial ice	29/054	19940222	53	-71.785	-105.151	N1305302	In his calculations Gerhard Dieckmann considered a diameter of 9.0cm. The corer diameter is not given in the cruise report. Salinity, NO3, NO2, NH4, PO4, Si and DOC measurements are from David Thomas.	no	0	2.51			1.93	76.8924			1.98	1.88	4.06		16.3508				1.81	1.81	0.06	1.83	3.7	0.21	2.44	59.98		17.619	1.51639	11.619		15.2914	15.2914	0.506897	15.4603	31.2586	1.77414	20.6138
ANTARKTIS XI/3	perenial ice	29/054	19940222	53	-71.785	-105.151	N1305302	In his calculations Gerhard Dieckmann considered a diameter of 9.0cm. The corer diameter is not given in the cruise report. Salinity, NO3, NO2, NH4, PO4, Si and DOC measurements are from David Thomas.	no	0	2.51			2.03	80.8765			2.08	1.98	4.77		23.7177				2.49	2.49	0.06	2.52	5.07	0.33	3.45	57.93		15.3636	1.46957	10.4545		17.905	17.905	0.431447	18.1208	36.4572	2.37296	24.8082
ANTARKTIS XI/3	perenial ice	29/054	19940222	53	-71.785	-105.151	N1305302	In his calculations Gerhard Dieckmann considered a diameter of 9.0cm. The corer diameter is not given in the cruise report. Salinity, NO3, NO2, NH4, PO4, Si and DOC measurements are from David Thomas.	no	0	2.51			2.13	84.8606			2.18	2.08	4.74		22.0856				3.14	3.14	0.07	2.23	5.44	0.37	3.61	34.93		14.7027	1.50693	9.75676		22.7219	22.7219	0.50654	16.1369	39.3654	2.67743	26.123
ANTARKTIS XI/3	perenial ice	29/054	19940222	53	-71.785	-105.151	N1305302	In his calculations Gerhard Dieckmann considered a diameter of 9.0cm. The corer diameter is not given in the cruise report. Salinity, NO3, NO2, NH4, PO4, Si and DOC measurements are from David Thomas.	no	0	2.51			2.23	88.8446			2.28	2.18	5.47		13.461				3.52	3.52	0.07	3.43	7.02	0.29	5.24	68.55		24.2069	1.33969	18.069		22.0724	22.0724	0.43894	21.508	44.0194	1.81846	32.8578
ANTARKTIS XI/3	perenial ice	29/054	19940222	53	-71.785	-105.151	N1305302	In his calculations Gerhard Dieckmann considered a diameter of 9.0cm. The corer diameter is not given in the cruise report. Salinity, NO3, NO2, NH4, PO4, Si and DOC measurements are from David Thomas.	no	0	2.51			2.33	92.8287			2.38	2.28	5.91		22.0856				3.42	3.42	0.07	1.85	5.34	0.33	5.74	95.06		16.1818	0.930314	17.3939		19.8487	19.8487	0.406261	10.7369	30.9919	1.91523	33.3134
ANTARKTIS XI/3	perenial ice	29/054	19940222	53	-71.785	-105.151	N1305302	In his calculations Gerhard Dieckmann considered a diameter of 9.0cm. The corer diameter is not given in the cruise report. Salinity, NO3, NO2, NH4, PO4, Si and DOC measurements are from David Thomas.	no	0	2.51			2.445	97.4104			2.51	2.38	5.04		16.3508				3.25	3.25	0.09	3.75	7.09	0.33	5.26	244.5		21.4848	1.34791	15.9394		22.1181	22.1181	0.6125	25.5208	48.2514	2.24583	35.7972
ANTARKTIS XI/3	perenial ice	29/054	19940222	53	-71.785	-105.151	N1305402	In his calculations Gerhard Dieckmann considered a diameter of 9.0cm. The corer diameter is not given in the cruise report. Salinity, NO3, NO2, NH4, PO4, Si and DOC measurements are from David Thomas.	no	1	2.44			0.05	2.04918			0.1	0	0.86		1.39252				0.85	0.85	0.02	4.04	4.91	0.07	1.54	91		70.1429	3.18831	22		33.9012	33.9012	0.797674	161.13	195.829	2.79186	61.4209
ANTARKTIS XI/3	perenial ice	29/054	19940222	53	-71.785	-105.151	N1305402	In his calculations Gerhard Dieckmann considered a diameter of 9.0cm. The corer diameter is not given in the cruise report. Salinity, NO3, NO2, NH4, PO4, Si and DOC measurements are from David Thomas.	no	0	2.44			0.15	6.14754			0.2	0.1	0.13		0.748665				0.26	0.26	0.01	1.02	1.29	0.01	0.79	76.05		129	1.63291	79		68.6	68.6	2.63846	269.123	340.362	2.63846	208.438
ANTARKTIS XI/3	perenial ice	29/054	19940222	53	-71.785	-105.151	N1305402	In his calculations Gerhard Dieckmann considered a diameter of 9.0cm. The corer diameter is not given in the cruise report. Salinity, NO3, NO2, NH4, PO4, Si and DOC measurements are from David Thomas.	no	0	2.44			0.25	10.2459			0.3	0.2	2.6		1.9615				0.51	0.51	0.01	0.66	1.18	0.07	1.64	78		16.8571	0.719512	23.4286		6.72808	6.72808	0.131923	8.70692	15.5669	0.923462	21.6354
ANTARKTIS XI/3	perenial ice	29/054	19940222	53	-71.785	-105.151	N1305402	In his calculations Gerhard Dieckmann considered a diameter of 9.0cm. The corer diameter is not given in the cruise report. Salinity, NO3, NO2, NH4, PO4, Si and DOC measurements are from David Thomas.	no	0	2.44			0.35	14.3443			0.4	0.3	2.73		1.88664				0.32	0.32	0	1.63	1.95	0.1	1.35	82.9		19.5	1.44444	13.5		4.02051	4.02051	0	20.4795	24.5	1.25641	16.9615
ANTARKTIS XI/3	perenial ice	29/054	19940222	53	-71.785	-105.151	N1305402	In his calculations Gerhard Dieckmann considered a diameter of 9.0cm. The corer diameter is not given in the cruise report. Salinity, NO3, NO2, NH4, PO4, Si and DOC measurements are from David Thomas.	no	0	2.44			0.445	18.2377			0.49	0.4	3.13		1.63209				0.69	0.69	0	1.07	1.76	0.1	1.77	68.35		17.6	0.99435	17.7		7.56134	7.56134	0	11.7256	19.2869	1.09585	19.3965
ANTARKTIS XI/3	perenial ice	29/054	19940222	53	-71.785	-105.151	N1305402	In his calculations Gerhard Dieckmann considered a diameter of 9.0cm. The corer diameter is not given in the cruise report. Salinity, NO3, NO2, NH4, PO4, Si and DOC measurements are from David Thomas.	no	0	2.44			0.54	22.1311			0.59	0.49	2.46		16.3508				0.87	0.87	0	1.96	2.83	0.27	2.07	83.1		10.4815	1.36715	7.66667		12.1305	12.1305	0	27.3285	39.4589	3.76463	28.8622
ANTARKTIS XI/3	perenial ice	29/054	19940222	53	-71.785	-105.151	N1305402	In his calculations Gerhard Dieckmann considered a diameter of 9.0cm. The corer diameter is not given in the cruise report. Salinity, NO3, NO2, NH4, PO4, Si and DOC measurements are from David Thomas.	no	0	2.44			0.64	26.2295			0.69	0.59	2.2		4.01284				0.38	0.38	0	3.57	3.95	0.11	1.44	50.9		35.9091	2.74306	13.0909		5.92455	5.92455	0	55.6595	61.5841	1.715	22.4509
ANTARKTIS XI/3	perenial ice	29/054	19940222	53	-71.785	-105.151	N1305402	In his calculations Gerhard Dieckmann considered a diameter of 9.0cm. The corer diameter is not given in the cruise report. Salinity, NO3, NO2, NH4, PO4, Si and DOC measurements are from David Thomas.	no	0	2.44			0.74	30.3279			0.79	0.69	3.43		9.05885				0.76	0.76	0.02	16.05	16.83	0.16	1.86	85.2		105.188	9.04839	11.625		7.6	7.6	0.2	160.5	168.3	1.6	18.6
ANTARKTIS XI/3	perenial ice	29/054	19940222	53	-71.785	-105.151	N1305402	In his calculations Gerhard Dieckmann considered a diameter of 9.0cm. The corer diameter is not given in the cruise report. Salinity, NO3, NO2, NH4, PO4, Si and DOC measurements are from David Thomas.	no	0	2.44			0.84	34.4262			0.89	0.79	3.11		12.4278				0.81	0.81	0.03	7.66	8.5	0.21	2.46	151.05		40.4762	3.45528	11.7143		8.93344	8.93344	0.330868	84.4817	93.746	2.31608	27.1312
ANTARKTIS XI/3	perenial ice	29/054	19940222	53	-71.785	-105.151	N1305402	In his calculations Gerhard Dieckmann considered a diameter of 9.0cm. The corer diameter is not given in the cruise report. Salinity, NO3, NO2, NH4, PO4, Si and DOC measurements are from David Thomas.	no	0	2.44			0.94	38.5246			0.99	0.89	3.64		19.63				1.26	1.26	0.02	4.66	5.94	0.31	3.05	166.5		19.1613	1.94754	9.83871		11.8731	11.8731	0.188462	43.9115	55.9731	2.92115	28.7404
ANTARKTIS XI/3	perenial ice	29/054	19940222	53	-71.785	-105.151	N1305402	In his calculations Gerhard Dieckmann considered a diameter of 9.0cm. The corer diameter is not given in the cruise report. Salinity, NO3, NO2, NH4, PO4, Si and DOC measurements are from David Thomas.	no	0	2.44			1.04	42.623			1.09	0.99	3.42		27.6856				1.24	1.24	0.01	3.56	4.81	0.45	2.78	137.9		10.6889	1.73022	6.17778		12.4363	12.4363	0.100292	35.7041	48.2406	4.51316	27.8813
ANTARKTIS XI/3	perenial ice	29/054	19940222	53	-71.785	-105.151	N1305402	In his calculations Gerhard Dieckmann considered a diameter of 9.0cm. The corer diameter is not given in the cruise report. Salinity, NO3, NO2, NH4, PO4, Si and DOC measurements are from David Thomas.	no	0	2.44			1.14	46.7213			1.19	1.09	4.39		102.477				1.96	1.96	0.03	2.7	4.69	1.1	4.24	349		4.26364	1.10613	3.85455		15.3139	15.3139	0.234396	21.0957	36.644	8.59453	33.128
ANTARKTIS XI/3	perenial ice	29/054	19940222	53	-71.785	-105.151	N1305402	In his calculations Gerhard Dieckmann considered a diameter of 9.0cm. The corer diameter is not given in the cruise report. Salinity, NO3, NO2, NH4, PO4, Si and DOC measurements are from David Thomas.	no	0	2.44			1.24	50.8197			1.29	1.19	11		376.189				7.62	7.62	0.05	6.44	14.11	3.2	12.84	205.45		4.40937	1.09891	4.0125		23.7605	23.7605	0.155909	20.0811	43.9975	9.97818	40.0375
ANTARKTIS XI/3	perenial ice	29/054	19940222	53	-71.785	-105.151	N1305402	In his calculations Gerhard Dieckmann considered a diameter of 9.0cm. The corer diameter is not given in the cruise report. Salinity, NO3, NO2, NH4, PO4, Si and DOC measurements are from David Thomas.	no	0	2.44			1.34	54.918			1.39	1.29	3.77		122.676				1.97	1.97	0.04	9.28	11.29	1.38	4.36	166.25		8.18116	2.58945	3.15942		17.9233	17.9233	0.363926	84.4308	102.718	12.5554	39.6679
ANTARKTIS XI/3	perenial ice	29/054	19940222	53	-71.785	-105.151	N1305402	In his calculations Gerhard Dieckmann considered a diameter of 9.0cm. The corer diameter is not given in the cruise report. Salinity, NO3, NO2, NH4, PO4, Si and DOC measurements are from David Thomas.	no	0	2.44			1.44	59.0164			1.49	1.39	3.97		79.1938				2.44	2.44	0.03	5.36	7.83	0.68	3.36	131.2		11.5147	2.33036	4.94118		21.0811	21.0811	0.259194	46.3093	67.6496	5.87506	29.0297
ANTARKTIS XI/3	perenial ice	29/054	19940222	53	-71.785	-105.151	N1305402	In his calculations Gerhard Dieckmann considered a diameter of 9.0cm. The corer diameter is not given in the cruise report. Salinity, NO3, NO2, NH4, PO4, Si and DOC measurements are from David Thomas.	no	0	2.44			1.54	63.1148			1.59	1.49	5.76		53.5745				3.45	3.45	0.05	7.04	10.54	0.97	7.72	119.4		10.866	1.36528	7.95876		20.5443	20.5443	0.297743	41.9222	62.7642	5.77622	45.9715
ANTARKTIS XI/3	perenial ice	29/054	19940222	53	-71.785	-105.151	N1305402	In his calculations Gerhard Dieckmann considered a diameter of 9.0cm. The corer diameter is not given in the cruise report. Salinity, NO3, NO2, NH4, PO4, Si and DOC measurements are from David Thomas.	no	0	2.44			1.64	67.2131			1.69	1.59	4.93		21.2621				3.41	3.41	0.04	3.71	7.16	0.45	6.59	57.95		15.9111	1.08649	14.6444		23.7247	23.7247	0.278296	25.812	49.815	3.13083	45.8493
ANTARKTIS XI/3	perenial ice	29/054	19940222	53	-71.785	-105.151	N1305402	In his calculations Gerhard Dieckmann considered a diameter of 9.0cm. The corer diameter is not given in the cruise report. Salinity, NO3, NO2, NH4, PO4, Si and DOC measurements are from David Thomas.	no	0	2.44			1.74	71.3115			1.79	1.69	4.78		19.63				2.74	2.74	0.05	3.08	5.87	0.45	4.58	95		13.0444	1.28166	10.1778		19.6615	19.6615	0.358787	22.1013	42.1215	3.22908	32.8649
ANTARKTIS XI/3	perenial ice	29/054	19940222	53	-71.785	-105.151	N1305402	In his calculations Gerhard Dieckmann considered a diameter of 9.0cm. The corer diameter is not given in the cruise report. Salinity, NO3, NO2, NH4, PO4, Si and DOC measurements are from David Thomas.	no	0	2.44			1.84	75.4098			1.89	1.79	7.37		22.0856				4.76	4.76	0.07	2.89	7.72	0.59	9.92	60.5		13.0847	0.778226	16.8136		22.1531	22.1531	0.32578	13.4501	35.9289	2.74586	46.1677
ANTARKTIS XI/3	perenial ice	29/054	19940222	53	-71.785	-105.151	N1305402	In his calculations Gerhard Dieckmann considered a diameter of 9.0cm. The corer diameter is not given in the cruise report. Salinity, NO3, NO2, NH4, PO4, Si and DOC measurements are from David Thomas.	no	0	2.44			1.94	79.5082			1.99	1.89	9.05		36.8044				5.22	5.22	0.05	1.71	6.98	0.74	11.81	70.36		9.43243	0.591025	15.9595		19.7841	19.7841	0.189503	6.48099	26.4546	2.80464	44.7606
ANTARKTIS XI/3	perenial ice	29/054	19940222	53	-71.785	-105.151	N1305402	In his calculations Gerhard Dieckmann considered a diameter of 9.0cm. The corer diameter is not given in the cruise report. Salinity, NO3, NO2, NH4, PO4, Si and DOC measurements are from David Thomas.	no	0	2.44			2.04	83.6066			2.09	1.99	5.88		16.3508				3.37	3.37	0.05	1.71	5.13	0.46	7.78	50.9		11.1522	0.659383	16.913		19.6583	19.6583	0.291667	9.975	29.925	2.68333	45.3833
ANTARKTIS XI/3	perenial ice	29/054	19940222	53	-71.785	-105.151	N1305402	In his calculations Gerhard Dieckmann considered a diameter of 9.0cm. The corer diameter is not given in the cruise report. Salinity, NO3, NO2, NH4, PO4, Si and DOC measurements are from David Thomas.	no	0	2.44			2.14	87.7049			2.19	2.09	6.08		8.28023				3.6	3.6	0.07	3.67	7.34	0.43	8.72	43.1		17.0698	0.841743	20.2791		20.3092	20.3092	0.394901	20.7041	41.4082	2.42582	49.1934
ANTARKTIS XI/3	perenial ice	29/054	19940222	53	-71.785	-105.151	N1305402	In his calculations Gerhard Dieckmann considered a diameter of 9.0cm. The corer diameter is not given in the cruise report. Salinity, NO3, NO2, NH4, PO4, Si and DOC measurements are from David Thomas.	no	0	2.44			2.24	91.8033			2.29	2.19	6.33		18.8065				3.5	3.5	0.06	5.62	9.18	0.87	8.14	61.4		10.5517	1.12776	9.35632		18.9652	18.9652	0.325118	30.4528	49.7431	4.71422	44.1077
ANTARKTIS XI/3	perenial ice	29/054	19940222	53	-71.785	-105.151	N1305402	In his calculations Gerhard Dieckmann considered a diameter of 9.0cm. The corer diameter is not given in the cruise report. Salinity, NO3, NO2, NH4, PO4, Si and DOC measurements are from David Thomas.	no	0	2.44			2.34	95.9016			2.39	2.29	5.89		9.05885				4.41	4.41	0.06	3.17	7.64	0.54	8.57	102.6		14.1481	0.891482	15.8704		25.6813	25.6813	0.349406	18.4603	44.491	3.14465	49.9068
ANTARKTIS XI/3	perenial ice	29/054	19940222	53	-71.785	-105.151	N1305402	In his calculations Gerhard Dieckmann considered a diameter of 9.0cm. The corer diameter is not given in the cruise report. Salinity, NO3, NO2, NH4, PO4, Si and DOC measurements are from David Thomas.	no	0	2.44			2.415	98.9754			2.44	2.39	5.72		16.3508				3.36	3.36	0.08	2.26	5.7	0.56	7.82	59.8		10.1786	0.7289	13.9643		20.1483	20.1483	0.47972	13.5521	34.1801	3.35804	46.8927
ANTARKTIS XI/3	perenial ice	29/054	19940222	53	-71.785	-105.151	N1305512	In his calculations Gerhard Dieckmann considered a diameter of 9.0cm. The corer diameter is not given in the cruise report. Salinity, NO3, NO2, NH4, PO4, Si and DOC measurements are from David Thomas.	no	1	2.56			0.05	1.95312			0.1	0	1.29		1.30268				0.48	0.48	0.05	1.29	1.82	0.07	0.89			26	2.04494	12.7143		12.7628	12.7628	1.32946	34.3	48.3922	1.86124	23.6643
ANTARKTIS XI/3	perenial ice	29/054	19940222	53	-71.785	-105.151	N1305512	In his calculations Gerhard Dieckmann considered a diameter of 9.0cm. The corer diameter is not given in the cruise report. Salinity, NO3, NO2, NH4, PO4, Si and DOC measurements are from David Thomas.	no	0	2.56			0.15	5.85938			0.2	0.1	1.84		0.958291				0.62	0.62	0.05	6.94	7.61	0.04	2.97			190.25	2.56229	74.25		11.5576	11.5576	0.932065	129.371	141.86	0.745652	55.3647
ANTARKTIS XI/3	perenial ice	29/054	19940222	53	-71.785	-105.151	N1305512	In his calculations Gerhard Dieckmann considered a diameter of 9.0cm. The corer diameter is not given in the cruise report. Salinity, NO3, NO2, NH4, PO4, Si and DOC measurements are from David Thomas.	no	0	2.56			0.25	9.76562			0.3	0.2	0.55		0.613905				0.15	0.15	0.04	1.55	1.74	0.03	0.21			58	8.28571	7		9.35455	9.35455	2.49455	96.6636	108.513	1.87091	13.0964
ANTARKTIS XI/3	perenial ice	29/054	19940222	53	-71.785	-105.151	N1305512	In his calculations Gerhard Dieckmann considered a diameter of 9.0cm. The corer diameter is not given in the cruise report. Salinity, NO3, NO2, NH4, PO4, Si and DOC measurements are from David Thomas.	no	0	2.56			0.35	13.6719			0.4	0.3	3.5		4.40215				0.73	0.73	0.05	3.78	4.56	1.14	2.04			4	2.23529	1.78947		7.154	7.154	0.49	37.044	44.688	11.172	19.992
ANTARKTIS XI/3	perenial ice	29/054	19940222	53	-71.785	-105.151	N1305512	In his calculations Gerhard Dieckmann considered a diameter of 9.0cm. The corer diameter is not given in the cruise report. Salinity, NO3, NO2, NH4, PO4, Si and DOC measurements are from David Thomas.	no	0	2.56			0.45	17.5781			0.5	0.4	3.42		5.68985				0.42	0.42	0.05	3.07	3.54	0.13	2.14			27.2308	1.65421	16.4615		4.21228	4.21228	0.501462	30.7898	35.5035	1.3038	21.4626
ANTARKTIS XI/3	perenial ice	29/054	19940222	53	-71.785	-105.151	N1305512	In his calculations Gerhard Dieckmann considered a diameter of 9.0cm. The corer diameter is not given in the cruise report. Salinity, NO3, NO2, NH4, PO4, Si and DOC measurements are from David Thomas.	no	0	2.56			0.55	21.4844			0.6	0.5	4.45		8.53478				0.24	0.24	0.04	3.65	3.93	0.16	2.85			24.5625	1.37895	17.8125		1.84989	1.84989	0.308315	28.1337	30.2919	1.23326	21.9674
ANTARKTIS XI/3	perenial ice	29/054	19940222	53	-71.785	-105.151	N1305512	In his calculations Gerhard Dieckmann considered a diameter of 9.0cm. The corer diameter is not given in the cruise report. Salinity, NO3, NO2, NH4, PO4, Si and DOC measurements are from David Thomas.	no	0	2.56			0.65	25.3906			0.7	0.6	4.47		10.3466				0.26	0.26	0.03	2.99	3.28	0.19	2.49			17.2632	1.31727	13.1053		1.99508	1.99508	0.230201	22.9434	25.1687	1.45794	19.1067
ANTARKTIS XI/3	perenial ice	29/054	19940222	53	-71.785	-105.151	N1305512	In his calculations Gerhard Dieckmann considered a diameter of 9.0cm. The corer diameter is not given in the cruise report. Salinity, NO3, NO2, NH4, PO4, Si and DOC measurements are from David Thomas.	no	0	2.56			0.75	29.2969			0.8	0.7	5.11		13.0867				0.41	0.41	0.04	3.1	3.55	0.21	3.22			16.9048	1.10248	15.3333		2.75205	2.75205	0.268493	20.8082	23.8288	1.40959	21.6137
ANTARKTIS XI/3	perenial ice	29/054	19940222	53	-71.785	-105.151	N1305512	In his calculations Gerhard Dieckmann considered a diameter of 9.0cm. The corer diameter is not given in the cruise report. Salinity, NO3, NO2, NH4, PO4, Si and DOC measurements are from David Thomas.	no	0	2.56			0.85	33.2031			0.9	0.8	4.5		19.63				0.66	0.66	0.05	3.45	4.16	0.35	2.81			11.8857	1.48043	8.02857		5.03067	5.03067	0.381111	26.2967	31.7084	2.66778	21.4184
ANTARKTIS XI/3	perenial ice	29/054	19940222	53	-71.785	-105.151	N1305512	In his calculations Gerhard Dieckmann considered a diameter of 9.0cm. The corer diameter is not given in the cruise report. Salinity, NO3, NO2, NH4, PO4, Si and DOC measurements are from David Thomas.	no	0	2.56			0.95	37.1094			1	0.9	4.72		26.1733				1.01	1.01	0.05	4.38	5.44	0.52	2.44	155.69		10.4615	2.22951	4.69231		7.33962	7.33962	0.363347	31.8292	39.5322	3.77881	17.7314
ANTARKTIS XI/3	perenial ice	29/054	19940222	53	-71.785	-105.151	N1305512	In his calculations Gerhard Dieckmann considered a diameter of 9.0cm. The corer diameter is not given in the cruise report. Salinity, NO3, NO2, NH4, PO4, Si and DOC measurements are from David Thomas.	no	0	2.56			1.04	40.625			1.08	1	4.7		97.8206				1.96	1.96	0.06	3.01	5.03	0.99	2.64	95.47		5.08081	1.9053	2.66667		14.3038	14.3038	0.437872	21.9666	36.7083	7.22489	19.2664
ANTARKTIS XI/3	perenial ice	29/054	19940222	53	-71.785	-105.151	N1305512	In his calculations Gerhard Dieckmann considered a diameter of 9.0cm. The corer diameter is not given in the cruise report. Salinity, NO3, NO2, NH4, PO4, Si and DOC measurements are from David Thomas.	no	0	2.56			1.15	44.9219			1.22	1.08	9.31		191.509				5.18	5.18	0.06	3.44	8.68	1.08	11.3	165.08		8.03704	0.768142	10.463		19.0842	19.0842	0.221053	12.6737	31.9789	3.97895	41.6316
ANTARKTIS XI/3	perenial ice	29/054	19940222	53	-71.785	-105.151	N1305512	In his calculations Gerhard Dieckmann considered a diameter of 9.0cm. The corer diameter is not given in the cruise report. Salinity, NO3, NO2, NH4, PO4, Si and DOC measurements are from David Thomas.	no	0	2.56			1.27	49.6094			1.32	1.22	5.67		310.756				2.23	2.23	0.05	6.88	9.16	1.43	4.56	173.46		6.40559	2.00877	3.18881		13.4901	13.4901	0.302469	41.6198	55.4123	8.65062	27.5852
ANTARKTIS XI/3	perenial ice	29/054	19940222	53	-71.785	-105.151	N1305512	In his calculations Gerhard Dieckmann considered a diameter of 9.0cm. The corer diameter is not given in the cruise report. Salinity, NO3, NO2, NH4, PO4, Si and DOC measurements are from David Thomas.	no	0	2.56			1.37	53.5156			1.42	1.32	3.94		30.261				0.56	0.56	0.04	2.89	3.49	3.6				0.969444				4.87513	4.87513	0.348223	25.1591	30.3825	31.3401
ANTARKTIS XI/3	perenial ice	29/054	19940222	53	-71.785	-105.151	N1305512	In his calculations Gerhard Dieckmann considered a diameter of 9.0cm. The corer diameter is not given in the cruise report. Salinity, NO3, NO2, NH4, PO4, Si and DOC measurements are from David Thomas.	no	0	2.56			1.47	57.4219			1.52	1.42	3.69		23.7177				0.88	0.88	0.04	3.1	4.02	0.34				11.8235				8.17995	8.17995	0.371816	28.8157	37.3675	3.16043
ANTARKTIS XI/3	perenial ice	29/054	19940222	53	-71.785	-105.151	N1305512	In his calculations Gerhard Dieckmann considered a diameter of 9.0cm. The corer diameter is not given in the cruise report. Salinity, NO3, NO2, NH4, PO4, Si and DOC measurements are from David Thomas.	no	0	2.56			1.57	61.3281			1.62	1.52	3.67		13.8952				0.93	0.93	0.05	3.79	4.77	0.18				26.5				8.69183	8.69183	0.467302	35.4215	44.5807	1.68229
ANTARKTIS XI/3	perenial ice	29/054	19940222	53	-71.785	-105.151	N1305512	In his calculations Gerhard Dieckmann considered a diameter of 9.0cm. The corer diameter is not given in the cruise report. Salinity, NO3, NO2, NH4, PO4, Si and DOC measurements are from David Thomas.	no	0	2.56			1.67	65.2344			1.72	1.62	2.93		14.7188				0.99	0.99	0.04	4.03	5.06	0.24				21.0833				11.5894	11.5894	0.468259	47.1771	59.2348	2.80956
ANTARKTIS XI/3	perenial ice	29/054	19940222	53	-71.785	-105.151	N1305512	In his calculations Gerhard Dieckmann considered a diameter of 9.0cm. The corer diameter is not given in the cruise report. Salinity, NO3, NO2, NH4, PO4, Si and DOC measurements are from David Thomas.	no	0	2.56			1.77	69.1406			1.82	1.72	3.23		11.6492				0.66	0.66	0.05	1.51	2.22	0.17				13.0588				7.00867	7.00867	0.53096	16.035	23.5746	1.80526
ANTARKTIS XI/3	perenial ice	29/054	19940222	53	-71.785	-105.151	N1305512	In his calculations Gerhard Dieckmann considered a diameter of 9.0cm. The corer diameter is not given in the cruise report. Salinity, NO3, NO2, NH4, PO4, Si and DOC measurements are from David Thomas.	no	0	2.56			1.87	73.0469			1.92	1.82	3.06		16.3508				0.81	0.81	0.06	1.93	2.8	0.18				15.5556				9.07941	9.07941	0.672549	21.6337	31.3856	2.01765
ANTARKTIS XI/3	perenial ice	29/054	19940222	53	-71.785	-105.151	N1305512	In his calculations Gerhard Dieckmann considered a diameter of 9.0cm. The corer diameter is not given in the cruise report. Salinity, NO3, NO2, NH4, PO4, Si and DOC measurements are from David Thomas.	no	0	2.56			1.97	76.9531			2.02	1.92	3.02		18.8065				1.94	1.94	0.05	2.08	4.07	0.55				7.4				22.0338	22.0338	0.567881	23.6238	46.2255	6.24669
ANTARKTIS XI/3	perenial ice	29/054	19940222	53	-71.785	-105.151	N1305512	In his calculations Gerhard Dieckmann considered a diameter of 9.0cm. The corer diameter is not given in the cruise report. Salinity, NO3, NO2, NH4, PO4, Si and DOC measurements are from David Thomas.	no	0	2.56			2.07	80.8594			2.12	2.02	4.78		6.72301				4.46	4.46	0.05	3.26	7.77	0.38				20.4474				32.0038	32.0038	0.358787	23.3929	55.7554	2.72678
ANTARKTIS XI/3	perenial ice	29/054	19940222	53	-71.785	-105.151	N1305512	In his calculations Gerhard Dieckmann considered a diameter of 9.0cm. The corer diameter is not given in the cruise report. Salinity, NO3, NO2, NH4, PO4, Si and DOC measurements are from David Thomas.	no	0	2.56			2.17	84.7656			2.22	2.12	3.91		5.95937				3.07	3.07	0.13	2.38	5.58	0.45				12.4				26.9312	26.9312	1.14041	20.8783	48.9499	3.94757
ANTARKTIS XI/3	perenial ice	29/054	19940222	53	-71.785	-105.151	N1305512	In his calculations Gerhard Dieckmann considered a diameter of 9.0cm. The corer diameter is not given in the cruise report. Salinity, NO3, NO2, NH4, PO4, Si and DOC measurements are from David Thomas.	no	0	2.56			2.28	89.0625			2.34	2.22	4.79		8.8043				3.3	3.3	0.2	3	6.5	0.45				14.4444				23.6305	23.6305	1.43215	21.4823	46.5449	3.22234
ANTARKTIS XI/3	perenial ice	29/054	19940222	53	-71.785	-105.151	N1305512	In his calculations Gerhard Dieckmann considered a diameter of 9.0cm. The corer diameter is not given in the cruise report. Salinity, NO3, NO2, NH4, PO4, Si and DOC measurements are from David Thomas.	no	0	2.56			2.39	93.3594			2.44	2.34	6.7		9.05885				3.79	3.79	0.06	2.5	6.35	0.53				11.9811				19.4025	19.4025	0.307164	12.7985	32.5082	2.71328
ANTARKTIS XI/3	perenial ice	29/054	19940222	53	-71.785	-105.151	N1305512	In his calculations Gerhard Dieckmann considered a diameter of 9.0cm. The corer diameter is not given in the cruise report. Salinity, NO3, NO2, NH4, PO4, Si and DOC measurements are from David Thomas.	no	0	2.56			2.5	97.6562			2.56	2.44	7.3		8.8043				4.14	4.14	0.05	3.57	7.76	0.67				11.5821				19.4523	19.4523	0.234932	16.7741	36.4614	3.14808
ANTARKTIS XI/3	perenial ice	29/054	19940222	53	-71.785	-105.151	N1305511	In his calculations Gerhard Dieckmann considered a diameter of 9.0cm. The corer diameter is not given in the cruise report. Salinity, NO3, NO2, NH4, PO4 and Si measurements are from David Thomas. I merged the two first depth for salinity.	no	1	4.31			0.05	1.16009			0.1	0	0.28		0.0598932				0.56	0.56	0.07	4.76	5.39	0.05	0.39			107.8	13.8205	7.8		68.6	68.6	8.575	583.1	660.275	6.125	47.775
ANTARKTIS XI/3	perenial ice	29/054	19940222	53	-71.785	-105.151	N1305511	In his calculations Gerhard Dieckmann considered a diameter of 9.0cm. The corer diameter is not given in the cruise report. Salinity, NO3, NO2, NH4, PO4 and Si measurements are from David Thomas. I merged the two first depth for salinity.	no	0	4.31			0.15	3.48028			0.2	0.1	0.87		0.0149733				0.26	0.26	0.07	2.13	2.46	0.03	0.65			82	3.78462	21.6667		10.2506	10.2506	2.75977	83.9759	96.9862	1.18276	25.6264
ANTARKTIS XI/3	perenial ice	29/054	19940222	53	-71.785	-105.151	N1305511	In his calculations Gerhard Dieckmann considered a diameter of 9.0cm. The corer diameter is not given in the cruise report. Salinity, NO3, NO2, NH4, PO4 and Si measurements are from David Thomas. I merged the two first depth for salinity.	no	0	4.31			0.25	5.80046			0.3	0.2	0.26		0.119786				0.41	0.41	0.06	0.76	1.23	1.34	0.46			0.91791	2.67391	0.343284		54.0885	54.0885	7.91538	100.262	162.265	176.777	60.6846
ANTARKTIS XI/3	perenial ice	29/054	19940222	53	-71.785	-105.151	N1305511	In his calculations Gerhard Dieckmann considered a diameter of 9.0cm. The corer diameter is not given in the cruise report. Salinity, NO3, NO2, NH4, PO4 and Si measurements are from David Thomas. I merged the two first depth for salinity.	no	0	4.31			0.35	8.12065			0.4	0.3	1.18		0.149733				0.31	0.31	0.08	1.11	1.5	0.08	1.36			18.75	1.10294	17		9.01102	9.01102	2.32542	32.2653	43.6017	2.32542	39.5322
ANTARKTIS XI/3	perenial ice	29/054	19940222	53	-71.785	-105.151	N1305511	In his calculations Gerhard Dieckmann considered a diameter of 9.0cm. The corer diameter is not given in the cruise report. Salinity, NO3, NO2, NH4, PO4 and Si measurements are from David Thomas. I merged the two first depth for salinity.	no	0	4.31			0.45	10.4408			0.5	0.4	1.53		1.33262				0.28	0.28	0.07	14.48	14.83	0.11	1.29			134.818	11.4961	11.7273		6.27712	6.27712	1.56928	324.617	332.463	2.46601	28.9196
ANTARKTIS XI/3	perenial ice	29/054	19940222	53	-71.785	-105.151	N1305511	In his calculations Gerhard Dieckmann considered a diameter of 9.0cm. The corer diameter is not given in the cruise report. Salinity, NO3, NO2, NH4, PO4 and Si measurements are from David Thomas. I merged the two first depth for salinity.	no	0	4.31			0.55	12.761			0.6	0.5	1.83		1.54225				0.2	0.2	0.06	1.24	1.5	0.13	1.23			11.5385	1.21951	9.46154		3.74863	3.74863	1.12459	23.2415	28.1148	2.43661	23.0541
ANTARKTIS XI/3	perenial ice	29/054	19940222	53	-71.785	-105.151	N1305511	In his calculations Gerhard Dieckmann considered a diameter of 9.0cm. The corer diameter is not given in the cruise report. Salinity, NO3, NO2, NH4, PO4 and Si measurements are from David Thomas. I merged the two first depth for salinity.	no	0	4.31			0.65	15.0812			0.7	0.6	2.72		1.93156
ANTARKTIS XI/3	perenial ice	29/054	19940222	53	-71.785	-105.151	N1305511	In his calculations Gerhard Dieckmann considered a diameter of 9.0cm. The corer diameter is not given in the cruise report. Salinity, NO3, NO2, NH4, PO4 and Si measurements are from David Thomas. I merged the two first depth for salinity.	no	0	4.31			0.75	17.4014			0.8	0.7	3.51		3.54867				0.25	0.25	0.08	1.06	1.39	0.22	1.84			6.31818	0.755435	8.36364		2.44302	2.44302	0.781766	10.3584	13.5832	2.14986	17.9806
ANTARKTIS XI/3	perenial ice	29/054	19940222	53	-71.785	-105.151	N1305511	In his calculations Gerhard Dieckmann considered a diameter of 9.0cm. The corer diameter is not given in the cruise report. Salinity, NO3, NO2, NH4, PO4 and Si measurements are from David Thomas. I merged the two first depth for salinity.	no	0	4.31			0.865	20.0696			0.93	0.8	4.06		16.3508				0.41	0.41	0.11	2.08	2.6	3.29	2.24			0.790274	1.16071	0.680851		3.46379	3.46379	0.92931	17.5724	21.9655	27.7948	18.9241
ANTARKTIS XI/3	perenial ice	29/054	19940222	53	-71.785	-105.151	N1305511	In his calculations Gerhard Dieckmann considered a diameter of 9.0cm. The corer diameter is not given in the cruise report. Salinity, NO3, NO2, NH4, PO4 and Si measurements are from David Thomas. I merged the two first depth for salinity.	no	0	4.31			1.005	23.3179			1.08	0.93	5.75		235.904				2.74	2.74	0.24	5.21	8.19	3.29	6.85			2.48936	1.19562	2.08207		16.3447	16.3447	1.43165	31.0788	48.8551	19.6256	40.8617
ANTARKTIS XI/3	perenial ice	29/054	19940222	53	-71.785	-105.151	N1305511	In his calculations Gerhard Dieckmann considered a diameter of 9.0cm. The corer diameter is not given in the cruise report. Salinity, NO3, NO2, NH4, PO4 and Si measurements are from David Thomas. I merged the two first depth for salinity.	no	0	4.31			1.155	26.7981			1.23	1.08	4.94		59.9681				2.34	2.34	0.12	9.07	11.53	1.65	4.78			6.98788	2.41213	2.89697		16.2474	16.2474	0.833198	62.9759	80.0565	11.4565	33.1891
ANTARKTIS XI/3	perenial ice	29/054	19940222	53	-71.785	-105.151	N1305511	In his calculations Gerhard Dieckmann considered a diameter of 9.0cm. The corer diameter is not given in the cruise report. Salinity, NO3, NO2, NH4, PO4 and Si measurements are from David Thomas. I merged the two first depth for salinity.	no	0	4.31			1.38	32.0186			1.53	1.23	3.86		32.7167				2.2	2.2	0.12	8.44	10.76	1.21	3.71			8.89256	2.90027	3.06612		19.5492	19.5492	1.06632	74.9979	95.6135	10.7521	32.9671
ANTARKTIS XI/3	perenial ice	29/054	19940222	53	-71.785	-105.151	N1305511	In his calculations Gerhard Dieckmann considered a diameter of 9.0cm. The corer diameter is not given in the cruise report. Salinity, NO3, NO2, NH4, PO4 and Si measurements are from David Thomas. I merged the two first depth for salinity.	no	0	4.31			1.605	37.239			1.68	1.53	4.06		31.8931				2.27	2.27	0.11	7.42	9.8	2.29	4.61			4.27948	2.12581	2.0131		19.1776	19.1776	0.92931	62.6862	82.7931	19.3466	38.9466
ANTARKTIS XI/3	perenial ice	29/054	19940222	53	-71.785	-105.151	N1305511	In his calculations Gerhard Dieckmann considered a diameter of 9.0cm. The corer diameter is not given in the cruise report. Salinity, NO3, NO2, NH4, PO4 and Si measurements are from David Thomas. I merged the two first depth for salinity.	no	0	4.31			1.73	40.1392			1.78	1.68	4.17		63.7863				2.6	2.6	0.16	4.04	6.8	3.33	6.24			2.04204	1.08974	1.87387		21.3861	21.3861	1.31607	33.2307	55.9329	27.3906	51.3266
ANTARKTIS XI/3	perenial ice	29/054	19940222	53	-71.785	-105.151	N1305511	In his calculations Gerhard Dieckmann considered a diameter of 9.0cm. The corer diameter is not given in the cruise report. Salinity, NO3, NO2, NH4, PO4 and Si measurements are from David Thomas. I merged the two first depth for salinity.	no	0	4.31			1.855	43.0394			1.93	1.78	2.97		21.7412				1.99	1.99	0.11	2.22	4.32	1.75	3.81			2.46857	1.13386	2.17714		22.9822	22.9822	1.27037	25.6384	49.8909	20.2104	44.001
ANTARKTIS XI/3	perenial ice	29/054	19940222	53	-71.785	-105.151	N1305511	In his calculations Gerhard Dieckmann considered a diameter of 9.0cm. The corer diameter is not given in the cruise report. Salinity, NO3, NO2, NH4, PO4 and Si measurements are from David Thomas. I merged the two first depth for salinity.	no	0	4.31			1.98	45.9397			2.03	1.93	4.34		40.8921				2.38	2.38	0.11	7.29	9.78	1.93	4.76			5.06736	2.05462	2.46632		18.8097	18.8097	0.869355	57.6145	77.2935	15.2532	37.6194
ANTARKTIS XI/3	perenial ice	29/054	19940222	53	-71.785	-105.151	N1305511	In his calculations Gerhard Dieckmann considered a diameter of 9.0cm. The corer diameter is not given in the cruise report. Salinity, NO3, NO2, NH4, PO4 and Si measurements are from David Thomas. I merged the two first depth for salinity.	no	0	4.31			2.115	49.0719			2.2	2.03	3.96		18.6867				2.9	2.9	0.2	2.57	5.67	1.75	5.32			3.24	1.06579	3.04		25.1187	25.1187	1.73232	22.2604	49.1114	15.1578	46.0798
ANTARKTIS XI/3	perenial ice	29/054	19940222	53	-71.785	-105.151	N1305511	In his calculations Gerhard Dieckmann considered a diameter of 9.0cm. The corer diameter is not given in the cruise report. Salinity, NO3, NO2, NH4, PO4 and Si measurements are from David Thomas. I merged the two first depth for salinity.	no	0	4.31			2.25	52.2042			2.3	2.2	3.45		6.94761				2.57	2.57	0.12	1.64	4.33	2.65	6.04			1.63396	0.716887	2.27925		25.551	25.551	1.19304	16.3049	43.049	26.3464	60.0499
ANTARKTIS XI/3	perenial ice	29/054	19940222	53	-71.785	-105.151	N1305511	In his calculations Gerhard Dieckmann considered a diameter of 9.0cm. The corer diameter is not given in the cruise report. Salinity, NO3, NO2, NH4, PO4 and Si measurements are from David Thomas. I merged the two first depth for salinity.	no	0	4.31			2.35	54.5244			2.4	2.3	3.3		4.2075				2.51	2.51	0.08	2.31	4.9	1.35	5.23			3.62963	0.936902	3.87407		26.0888	26.0888	0.831515	24.01	50.9303	14.0318	54.3603
ANTARKTIS XI/3	perenial ice	29/054	19940222	53	-71.785	-105.151	N1305511	In his calculations Gerhard Dieckmann considered a diameter of 9.0cm. The corer diameter is not given in the cruise report. Salinity, NO3, NO2, NH4, PO4 and Si measurements are from David Thomas. I merged the two first depth for salinity.	no	0	4.31			2.45	56.8445			2.5	2.4	4.01		5.64493				2.96	2.96	0.13	1.82	4.91	2.51	6.14			1.95618	0.799674	2.44622		25.3187	25.3187	1.11197	15.5676	41.9983	21.4696	52.5192
ANTARKTIS XI/3	perenial ice	29/054	19940222	53	-71.785	-105.151	N1305511	In his calculations Gerhard Dieckmann considered a diameter of 9.0cm. The corer diameter is not given in the cruise report. Salinity, NO3, NO2, NH4, PO4 and Si measurements are from David Thomas. I merged the two first depth for salinity.	no	0	4.31			2.555	59.2807			2.61	2.5	3.72		2.03637				2.78	2.78	0.11	2.13	5.02	0.54	5.6			9.2963	0.896429	10.3704		25.6328	25.6328	1.01425	19.6395	46.2866	4.97903	51.6344
ANTARKTIS XI/3	perenial ice	29/054	19940222	53	-71.785	-105.151	N1305511	In his calculations Gerhard Dieckmann considered a diameter of 9.0cm. The corer diameter is not given in the cruise report. Salinity, NO3, NO2, NH4, PO4 and Si measurements are from David Thomas. I merged the two first depth for salinity.	no	0	4.31			2.73	63.3411			2.85	2.61	4.02		26.0236				2.83	2.83	0.18	3.3	6.31	4	6.46			1.5775	0.97678	1.615		24.1465	24.1465	1.53582	28.1567	53.8391	34.1294	55.1189
ANTARKTIS XI/3	perenial ice	29/054	19940222	53	-71.785	-105.151	N1305511	In his calculations Gerhard Dieckmann considered a diameter of 9.0cm. The corer diameter is not given in the cruise report. Salinity, NO3, NO2, NH4, PO4 and Si measurements are from David Thomas. I merged the two first depth for salinity.	no	0	4.31			2.91	67.5174			2.97	2.85	2.9		9.53799				2.16	2.16	0.09	10.44	12.69	4.2	6			3.02143	2.115	1.42857		25.5476	25.5476	1.06448	123.48	150.092	49.6759	70.9655
ANTARKTIS XI/3	perenial ice	29/054	19940222	53	-71.785	-105.151	N1305511	In his calculations Gerhard Dieckmann considered a diameter of 9.0cm. The corer diameter is not given in the cruise report. Salinity, NO3, NO2, NH4, PO4 and Si measurements are from David Thomas. I merged the two first depth for salinity.	no	0	4.31			3.02	70.0696			3.07	2.97	3.15		2.246				2.57	2.57	0.09	5.51	8.17	1.02	5.77			8.0098	1.41594	5.65686		27.9844	27.9844	0.98	59.9978	88.9622	11.1067	62.8289
ANTARKTIS XI/3	perenial ice	29/054	19940222	53	-71.785	-105.151	N1305511	In his calculations Gerhard Dieckmann considered a diameter of 9.0cm. The corer diameter is not given in the cruise report. Salinity, NO3, NO2, NH4, PO4 and Si measurements are from David Thomas. I merged the two first depth for salinity.	no	0	4.31			3.12	72.3898			3.17	3.07	3.67		1.76685				2.97	2.97	0.1	10.71	13.78	0.74	7.84			18.6216	1.75765	10.5946		27.7578	27.7578	0.934605	100.096	128.789	6.91608	73.273
ANTARKTIS XI/3	perenial ice	29/054	19940222	53	-71.785	-105.151	N1305511	In his calculations Gerhard Dieckmann considered a diameter of 9.0cm. The corer diameter is not given in the cruise report. Salinity, NO3, NO2, NH4, PO4 and Si measurements are from David Thomas. I merged the two first depth for salinity.	no	0	4.31			3.22	74.71			3.27	3.17	3.21		1.33262				2.99	2.99	0.12	75.6	78.71	2.99	7.1			26.3244	11.0859	2.37458		31.9492	31.9492	1.28224	807.813	841.045	31.9492	75.866
ANTARKTIS XI/3	perenial ice	29/054	19940222	53	-71.785	-105.151	N1305511	In his calculations Gerhard Dieckmann considered a diameter of 9.0cm. The corer diameter is not given in the cruise report. Salinity, NO3, NO2, NH4, PO4 and Si measurements are from David Thomas. I merged the two first depth for salinity.	no	0	4.31			3.32	77.0302			3.37	3.27	2.58		0.943318				2.31	2.31	0.1	1.04	3.45	2.31	5.49			1.49351	0.628415	2.37662		30.7105	30.7105	1.32946	13.8264	45.8663	30.7105	72.9872
ANTARKTIS XI/3	perenial ice	29/054	19940222	53	-71.785	-105.151	N1305511	In his calculations Gerhard Dieckmann considered a diameter of 9.0cm. The corer diameter is not given in the cruise report. Salinity, NO3, NO2, NH4, PO4 and Si measurements are from David Thomas. I merged the two first depth for salinity.	no	0	4.31			3.43	79.5824			3.49	3.37	2.4		0.853478				2.21	2.21	0.1	2.7	5.01	2.14	5.09			2.34112	0.984283	2.3785		31.5846	31.5846	1.42917	38.5875	71.6012	30.5842	72.7446
ANTARKTIS XI/3	perenial ice	29/054	19940222	53	-71.785	-105.151	N1305511	In his calculations Gerhard Dieckmann considered a diameter of 9.0cm. The corer diameter is not given in the cruise report. Salinity, NO3, NO2, NH4, PO4 and Si measurements are from David Thomas. I merged the two first depth for salinity.	no	0	4.31			3.555	82.4826			3.62	3.49	2.41		0.913371				2.36	2.36	0.1	2.46	4.92	2.36	5.72			2.08475	0.86014	2.42373		33.5884	33.5884	1.42324	35.0116	70.0232	33.5884	81.4091
ANTARKTIS XI/3	perenial ice	29/054	19940222	53	-71.785	-105.151	N1305511	In his calculations Gerhard Dieckmann considered a diameter of 9.0cm. The corer diameter is not given in the cruise report. Salinity, NO3, NO2, NH4, PO4 and Si measurements are from David Thomas. I merged the two first depth for salinity.	no	0	4.31			3.68	85.3828			3.74	3.62	3.05		0.928345				2.86	2.86	0.09	1.5	4.45	2.72	6.49			1.63603	0.68567	2.38603		32.1633	32.1633	1.01213	16.8689	50.0443	30.5889	72.9859
ANTARKTIS XI/3	perenial ice	29/054	19940222	53	-71.785	-105.151	N1305511	In his calculations Gerhard Dieckmann considered a diameter of 9.0cm. The corer diameter is not given in the cruise report. Salinity, NO3, NO2, NH4, PO4 and Si measurements are from David Thomas. I merged the two first depth for salinity.	no	0	4.31			3.785	87.819			3.83	3.74	4.53		1.25776				3.23	3.23	0.1	1.31	4.64	0.37	7.56			12.5405	0.613757	20.4324		24.4567	24.4567	0.757174	9.91898	35.1329	2.80155	57.2424
ANTARKTIS XI/3	perenial ice	29/054	19940222	53	-71.785	-105.151	N1305511	In his calculations Gerhard Dieckmann considered a diameter of 9.0cm. The corer diameter is not given in the cruise report. Salinity, NO3, NO2, NH4, PO4 and Si measurements are from David Thomas. I merged the two first depth for salinity.	no	0	4.31			3.87	89.7912			3.91	3.83	4.05		6.88772				2.8	2.8	0.1	3.13	6.03	2.56	5.98			2.35547	1.00836	2.33594		23.7136	23.7136	0.846914	26.5084	51.0689	21.681	50.6454
ANTARKTIS XI/3	perenial ice	29/054	19940222	53	-71.785	-105.151	N1305511	In his calculations Gerhard Dieckmann considered a diameter of 9.0cm. The corer diameter is not given in the cruise report. Salinity, NO3, NO2, NH4, PO4 and Si measurements are from David Thomas. I merged the two first depth for salinity.	no	0	4.31			3.96	91.8794			4.01	3.91	3.9		2.1861				2.85	2.85	0.08	1.24	4.17	0.58	5.51			7.18966	0.756806	9.5		25.0654	25.0654	0.70359	10.9056	36.6746	5.10103	48.4597
ANTARKTIS XI/3	perenial ice	29/054	19940222	53	-71.785	-105.151	N1305511	In his calculations Gerhard Dieckmann considered a diameter of 9.0cm. The corer diameter is not given in the cruise report. Salinity, NO3, NO2, NH4, PO4 and Si measurements are from David Thomas. I merged the two first depth for salinity.	no	0	4.31			4.06	94.1995			4.11	4.01	3.81		2.11124				2.66	2.66	0.09	1.49	4.24	0.43	5.14			9.86047	0.824903	11.9535		23.947	23.947	0.810236	13.4139	38.1711	3.87113	46.2735
ANTARKTIS XI/3	perenial ice	29/054	19940222	53	-71.785	-105.151	N1305511	In his calculations Gerhard Dieckmann considered a diameter of 9.0cm. The corer diameter is not given in the cruise report. Salinity, NO3, NO2, NH4, PO4 and Si measurements are from David Thomas. I merged the two first depth for salinity.	no	0	4.31			4.16	96.5197			4.21	4.11	4.19		3.60857				2.9	2.9	0.13	2.25	5.28	0.61	5.68			8.65574	0.929577	9.31148		23.7399	23.7399	1.0642	18.4189	43.2229	4.99356	46.4974
ANTARKTIS XI/3	perenial ice	29/054	19940222	53	-71.785	-105.151	N1305511	In his calculations Gerhard Dieckmann considered a diameter of 9.0cm. The corer diameter is not given in the cruise report. Salinity, NO3, NO2, NH4, PO4 and Si measurements are from David Thomas. I merged the two first depth for salinity.	no	0	4.31			4.26	98.8399			4.31	4.21	6.38		7.98077				3.99	3.99	0.15	4.71	8.85	1.03	8.87			8.59223	0.997745	8.61165		21.4509	21.4509	0.806426	25.3218	47.5792	5.53746	47.6867
ANTARKTIS XI/3	perenial ice	29/057	19940228	59	-73.1517	-121.836	N1305902	In his calculations Gerhard Dieckmann considered a diameter of 9.0cm. The corer diameter is not given in the cruise report. Salinity, NO3, NO2, NH4, PO4 and Si measurements are from David Thomas. I merged the two first depth for salinity.	no	1	1.45			0.05	3.44828			0.1	0	5.47		3.02461				1.05	1.05	0.06	3.27	4.38	0.36	6.65			12.1667	0.658647	18.4722		6.5841	6.5841	0.376234	20.5048	27.4651	2.2574	41.6993
ANTARKTIS XI/3	perenial ice	29/057	19940228	59	-73.1517	-121.836	N1305902	In his calculations Gerhard Dieckmann considered a diameter of 9.0cm. The corer diameter is not given in the cruise report. Salinity, NO3, NO2, NH4, PO4 and Si measurements are from David Thomas. I merged the two first depth for salinity.	no	0	1.45			0.15	10.3448			0.2	0.1	11.7		7.50162				0.57	0.57	0.09	2.24	2.9	0.53	14.54			5.4717	0.19945	27.434		1.67103	1.67103	0.263846	6.56684	8.50171	1.55376	42.6258
ANTARKTIS XI/3	perenial ice	29/057	19940228	59	-73.1517	-121.836	N1305902	In his calculations Gerhard Dieckmann considered a diameter of 9.0cm. The corer diameter is not given in the cruise report. Salinity, NO3, NO2, NH4, PO4 and Si measurements are from David Thomas.	no	0	1.45			0.25	17.2414			0.3	0.2	9.02		19.63				0.19	0.19	0.06	1.92	2.17	0.87	11.54			2.49425	0.188042	13.2644		0.722506	0.722506	0.22816	7.30111	8.25177	3.30831	43.8827
ANTARKTIS XI/3	perenial ice	29/057	19940228	59	-73.1517	-121.836	N1305902	In his calculations Gerhard Dieckmann considered a diameter of 9.0cm. The corer diameter is not given in the cruise report. Salinity, NO3, NO2, NH4, PO4 and Si measurements are from David Thomas.	no	0	1.45			0.35	24.1379			0.4	0.3	6.56		37.6129				0.76	0.76	0.06	2.44	3.26	0.57	7.82			5.7193	0.41688	13.7193		3.97378	3.97378	0.31372	12.7579	17.0454	2.98034	40.8881
ANTARKTIS XI/3	perenial ice	29/057	19940228	59	-73.1517	-121.836	N1305902	In his calculations Gerhard Dieckmann considered a diameter of 9.0cm. The corer diameter is not given in the cruise report. Salinity, NO3, NO2, NH4, PO4 and Si measurements are from David Thomas.	no	0	1.45			0.45	31.0345			0.5	0.4	6.05		22.0856				1.43	1.43	0.09	6.54	8.06	0.37	7.92			21.7838	1.01768	21.4054		8.10727	8.10727	0.510248	37.078	45.6955	2.09769	44.9018
ANTARKTIS XI/3	perenial ice	29/057	19940228	59	-73.1517	-121.836	N1305902	In his calculations Gerhard Dieckmann considered a diameter of 9.0cm. The corer diameter is not given in the cruise report. Salinity, NO3, NO2, NH4, PO4 and Si measurements are from David Thomas.	no	0	1.45			0.55	37.931			0.6	0.5	4.55		16.3508				1.34	1.34	0.07	2.39	3.8	0.34	6.93			11.1765	0.548341	20.3824		10.1015	10.1015	0.527692	18.0169	28.6462	2.56308	52.2415
ANTARKTIS XI/3	perenial ice	29/057	19940228	59	-73.1517	-121.836	N1305902	In his calculations Gerhard Dieckmann considered a diameter of 9.0cm. The corer diameter is not given in the cruise report. Salinity, NO3, NO2, NH4, PO4 and Si measurements are from David Thomas.	no	0	1.45			0.65	44.8276			0.7	0.6	4.11		11.4546				1.55	1.55	0.06	2.91	4.52	0.49	7.86			9.22449	0.575064	16.0408		12.9355	12.9355	0.50073	24.2854	37.7217	4.08929	65.5956
ANTARKTIS XI/3	perenial ice	29/057	19940228	59	-73.1517	-121.836	N1305902	In his calculations Gerhard Dieckmann considered a diameter of 9.0cm. The corer diameter is not given in the cruise report. Salinity, NO3, NO2, NH4, PO4 and Si measurements are from David Thomas.	no	0	1.45			0.75	51.7241			0.8	0.7	3.34		25.3498				1.85	1.85	0.07	5.71	7.63	0.77	7.45			9.90909	1.02416	9.67532		18.9985	18.9985	0.718862	58.6386	78.356	7.90749	76.5075
ANTARKTIS XI/3	perenial ice	29/057	19940228	59	-73.1517	-121.836	N1305902	In his calculations Gerhard Dieckmann considered a diameter of 9.0cm. The corer diameter is not given in the cruise report. Salinity, NO3, NO2, NH4, PO4 and Si measurements are from David Thomas.	no	0	1.45			0.85	58.6207			0.9	0.8	2.67		19.63				1.32	1.32	0.07	6.44	7.83	0.4	6.12			19.575	1.27941	15.3		16.9573	16.9573	0.899251	82.7311	100.588	5.13858	78.6202
ANTARKTIS XI/3	perenial ice	29/057	19940228	59	-73.1517	-121.836	N1305902	In his calculations Gerhard Dieckmann considered a diameter of 9.0cm. The corer diameter is not given in the cruise report. Salinity, NO3, NO2, NH4, PO4 and Si measurements are from David Thomas.	no	0	1.45			0.95	65.5172			1	0.9	5.48		17.9979				2.78	2.78	0.1	3.74	6.62	0.54	11.7			12.2593	0.565812	21.6667		17.4004	17.4004	0.625912	23.4091	41.4354	3.37993	73.2318
ANTARKTIS XI/3	perenial ice	29/057	19940228	59	-73.1517	-121.836	N1305902	In his calculations Gerhard Dieckmann considered a diameter of 9.0cm. The corer diameter is not given in the cruise report. Salinity, NO3, NO2, NH4, PO4 and Si measurements are from David Thomas.	no	0	1.45			1.05	72.4138			1.1	1	5.76		13.0867				3.66	3.66	0.12	5.81	9.59	0.52	14.11			18.4423	0.67966	27.1346		21.7948	21.7948	0.714583	34.5977	57.1071	3.09653	84.0231
ANTARKTIS XI/3	perenial ice	29/057	19940228	59	-73.1517	-121.836	N1305902	In his calculations Gerhard Dieckmann considered a diameter of 9.0cm. The corer diameter is not given in the cruise report. Salinity, NO3, NO2, NH4, PO4 and Si measurements are from David Thomas.	no	0	1.45			1.15	79.3103			1.2	1.1	3.37		8.8043				2.03	2.03	0.07	3.33	5.43	0.77	8.75			7.05195	0.620571	11.3636		20.6614	20.6614	0.712463	33.8929	55.2668	7.83709	89.0579
ANTARKTIS XI/3	perenial ice	29/057	19940228	59	-73.1517	-121.836	N1305902	In his calculations Gerhard Dieckmann considered a diameter of 9.0cm. The corer diameter is not given in the cruise report. Salinity, NO3, NO2, NH4, PO4 and Si measurements are from David Thomas.	no	0	1.45			1.25	86.2069			1.3	1.2	2.31		8.53478
ANTARKTIS XI/3	perenial ice	29/057	19940228	59	-73.1517	-121.836	N1305902	In his calculations Gerhard Dieckmann considered a diameter of 9.0cm. The corer diameter is not given in the cruise report. Salinity, NO3, NO2, NH4, PO4 and Si measurements are from David Thomas.	no	0	1.45			1.35	93.1034			1.4	1.3	2.81		8.28023				2.02	2.02	0.06	3.22	5.3	0.43	8.89			12.3256	0.596175	20.6744		24.6569	24.6569	0.732384	39.3046	64.694	5.24875	108.515
ANTARKTIS XI/3	perenial ice	29/057	19940228	59	-73.1517	-121.836	N1305902	In his calculations Gerhard Dieckmann considered a diameter of 9.0cm. The corer diameter is not given in the cruise report. Salinity, NO3, NO2, NH4, PO4 and Si measurements are from David Thomas.	no	0	1.45			1.425	98.2759			1.45	1.4	2.81		6.72301				2.27	2.27	0.09	8.24	10.6	0.42	7.98			25.2381	1.32832	19		27.7085	27.7085	1.09858	100.581	129.388	5.12669	97.4071
ANTARKTIS XI/3	perenial ice	29/057	19940228	59	-73.1517	-121.836	N1305903	In his calculations Gerhard Dieckmann considered a diameter of 9.0cm. The corer diameter is not given in the cruise report. Salinity, NO3, NO2, NH4, PO4 and Si measurements are from David Thomas.	no	1	1.35			0.05	3.7037			0.1	0	6.8		6.21392				1.44	1.44	0.06	22.1	23.6	1.25	7.02			18.88	3.36182	5.616		7.26353	7.26353	0.302647	111.475	119.041	6.30515	35.4097
ANTARKTIS XI/3	perenial ice	29/057	19940228	59	-73.1517	-121.836	N1305903	In his calculations Gerhard Dieckmann considered a diameter of 9.0cm. The corer diameter is not given in the cruise report. Salinity, NO3, NO2, NH4, PO4 and Si measurements are from David Thomas.	no	0	1.35			0.15	11.1111			0.2	0.1	8		9.83746				1.72	1.72	0.08	5.59	7.39	0.84	8.62			8.79762	0.857309	10.2619		7.3745	7.3745	0.343	23.9671	31.6846	3.6015	36.9582
ANTARKTIS XI/3	perenial ice	29/057	19940228	59	-73.1517	-121.836	N1305903	In his calculations Gerhard Dieckmann considered a diameter of 9.0cm. The corer diameter is not given in the cruise report. Salinity, NO3, NO2, NH4, PO4 and Si measurements are from David Thomas.	no	0	1.35			0.235	17.4074			0.27	0.2	8.94		14.7188				1	1	0.05	3.15	4.2	0.94	8.96			4.46809	0.46875	9.53191		3.83669	3.83669	0.191834	12.0856	16.1141	3.60649	34.3767
ANTARKTIS XI/3	perenial ice	29/057	19940228	59	-73.1517	-121.836	N1305903	In his calculations Gerhard Dieckmann considered a diameter of 9.0cm. The corer diameter is not given in the cruise report. Salinity, NO3, NO2, NH4, PO4 and Si measurements are from David Thomas.	no	0	1.35			0.32	23.7037			0.37	0.27	6.31		30.261				1.01	1.01	0.04	2.04	3.09	0.67	6.39			4.61194	0.483568	9.53731		5.49017	5.49017	0.217433	11.0891	16.7967	3.642	34.7349
ANTARKTIS XI/3	perenial ice	29/057	19940228	59	-73.1517	-121.836	N1305903	In his calculations Gerhard Dieckmann considered a diameter of 9.0cm. The corer diameter is not given in the cruise report. Salinity, NO3, NO2, NH4, PO4 and Si measurements are from David Thomas.	no	0	1.35			0.42	31.1111			0.47	0.37	4.28		11.1252				1	1	0.05	3.79	4.84	0.83	4.15			5.83133	1.16627	5		8.01402	8.01402	0.400701	30.3731	38.7879	6.65164	33.2582
ANTARKTIS XI/3	perenial ice	29/057	19940228	59	-73.1517	-121.836	N1305903	In his calculations Gerhard Dieckmann considered a diameter of 9.0cm. The corer diameter is not given in the cruise report. Salinity, NO3, NO2, NH4, PO4 and Si measurements are from David Thomas.	no	0	1.35			0.52	38.5185			0.57	0.47	4.71		11.3797				0.98	0.98	0.07	2.92	3.97	0.41	5.21			9.68293	0.761996	12.7073		7.13673	7.13673	0.509766	21.2645	28.911	2.98577	37.9412
ANTARKTIS XI/3	perenial ice	29/057	19940228	59	-73.1517	-121.836	N1305903	In his calculations Gerhard Dieckmann considered a diameter of 9.0cm. The corer diameter is not given in the cruise report. Salinity, NO3, NO2, NH4, PO4 and Si measurements are from David Thomas.	no	0	1.35			0.62	45.9259			0.67	0.57	4		9.83746				1.45	1.45	0.05	3.02	4.52	0.44	4.73			10.2727	0.955603	10.75		12.4337	12.4337	0.42875	25.8965	38.759	3.773	40.5598
ANTARKTIS XI/3	perenial ice	29/057	19940228	59	-73.1517	-121.836	N1305903	In his calculations Gerhard Dieckmann considered a diameter of 9.0cm. The corer diameter is not given in the cruise report. Salinity, NO3, NO2, NH4, PO4 and Si measurements are from David Thomas.	no	0	1.35			0.72	53.3333			0.77	0.67	4.39		13.7305				1.45	1.45	0.05	5.96	7.46	0.44	5.71			16.9545	1.30648	12.9773		11.3292	11.3292	0.390661	46.5667	58.2866	3.43781	44.6134
ANTARKTIS XI/3	perenial ice	29/057	19940228	59	-73.1517	-121.836	N1305903	In his calculations Gerhard Dieckmann considered a diameter of 9.0cm. The corer diameter is not given in the cruise report. Salinity, NO3, NO2, NH4, PO4 and Si measurements are from David Thomas.	no	0	1.35			0.81	60			0.85	0.77	4.22		15.5423				1.54	1.54	0.06	7.3	8.9	0.52	5.76			17.1154	1.54514	11.0769		12.5171	12.5171	0.487678	59.3341	72.3389	4.22654	46.8171
ANTARKTIS XI/3	perenial ice	29/057	19940228	59	-73.1517	-121.836	N1305903	In his calculations Gerhard Dieckmann considered a diameter of 9.0cm. The corer diameter is not given in the cruise report. Salinity, NO3, NO2, NH4, PO4 and Si measurements are from David Thomas.	no	0	1.35			0.9	66.6667			0.95	0.85	4.22		10.092				2.17	2.17	0.08	3.73	5.98	0.53	8.75			11.283	0.683429	16.5094		17.6377	17.6377	0.650237	30.3173	48.6052	4.30782	71.1197
ANTARKTIS XI/3	perenial ice	29/057	19940228	59	-73.1517	-121.836	N1305903	In his calculations Gerhard Dieckmann considered a diameter of 9.0cm. The corer diameter is not given in the cruise report. Salinity, NO3, NO2, NH4, PO4 and Si measurements are from David Thomas.	no	0	1.35			1	74.0741			1.05	0.95	3.54		8.28023				2.13	2.13	0.09	9.32	11.54	0.62	9.52			18.6129	1.21218	15.3548		20.6381	20.6381	0.872034	90.304	111.814	6.00734	92.2418
ANTARKTIS XI/3	perenial ice	29/057	19940228	59	-73.1517	-121.836	N1305903	In his calculations Gerhard Dieckmann considered a diameter of 9.0cm. The corer diameter is not given in the cruise report. Salinity, NO3, NO2, NH4, PO4 and Si measurements are from David Thomas.	no	0	1.35			1.1	81.4815			1.15	1.05	4.16		15.5423				2.31	2.31	0.09	6.41	8.81	0.72	11.12			12.2361	0.792266	15.4444		19.0464	19.0464	0.742067	52.8517	72.6401	5.93654	91.6865
ANTARKTIS XI/3	perenial ice	29/057	19940228	59	-73.1517	-121.836	N1305903	In his calculations Gerhard Dieckmann considered a diameter of 9.0cm. The corer diameter is not given in the cruise report. Salinity, NO3, NO2, NH4, PO4 and Si measurements are from David Thomas.	no	0	1.35			1.2	88.8889			1.25	1.15	4.35		15.5423				2.41	2.41	0.07	2.38	4.86	0.57	10.01			8.52632	0.485514	17.5614		19.003	19.003	0.551954	18.7664	38.3214	4.49448	78.9294
ANTARKTIS XI/3	perenial ice	29/057	19940228	59	-73.1517	-121.836	N1305903	In his calculations Gerhard Dieckmann considered a diameter of 9.0cm. The corer diameter is not given in the cruise report. Salinity, NO3, NO2, NH4, PO4 and Si measurements are from David Thomas.	no	0	1.35			1.3	96.2963			1.35	1.25	4.36		6.99253				1.82	1.82	0.05	3.3	5.17	0.37	7.88			13.973	0.656091	21.2973		14.3179	14.3179	0.393349	25.961	40.6722	2.91078	61.9917
ANTARKTIS XI/3	perenial ice	29/057	19940228	59	-73.1517	-121.836	N1305912	In his calculations Gerhard Dieckmann considered a diameter of 9.0cm. The corer diameter is not given in the cruise report. Salinity, NO3, NO2, NH4, PO4 and Si measurements are from David Thomas.	no	1	2.6			0.05	1.92308			0.1	0	4.37		0.419252				3.98	3.98	0.07	6.23	10.28	0.4	2.16			25.7	4.75926	5.4		31.2389	31.2389	0.549428	48.8991	80.6874	3.13959	16.9538
ANTARKTIS XI/3	perenial ice	29/057	19940228	59	-73.1517	-121.836	N1305912	In his calculations Gerhard Dieckmann considered a diameter of 9.0cm. The corer diameter is not given in the cruise report. Salinity, NO3, NO2, NH4, PO4 and Si measurements are from David Thomas.	no	0	2.6			0.13	5			0.16	0.1	4.07		0.568985				3.13	3.13	0.06	4.75	7.94	0.31	1.99			25.6129	3.98995	6.41935		26.3781	26.3781	0.505651	40.0307	66.9145	2.61253	16.7708
ANTARKTIS XI/3	perenial ice	29/057	19940228	59	-73.1517	-121.836	N1305912	In his calculations Gerhard Dieckmann considered a diameter of 9.0cm. The corer diameter is not given in the cruise report. Salinity, NO3, NO2, NH4, PO4 and Si measurements are from David Thomas.	no	0	2.6			0.195	7.5			0.23	0.16	1.13		0.598932				1.24	1.24	0.04	2.14	3.42	0.11	1.13			31.0909	3.02655	10.2727		37.6389	37.6389	1.21416	64.9575	103.811	3.33894	34.3
ANTARKTIS XI/3	perenial ice	29/057	19940228	59	-73.1517	-121.836	N1305912	In his calculations Gerhard Dieckmann considered a diameter of 9.0cm. The corer diameter is not given in the cruise report. Salinity, NO3, NO2, NH4, PO4 and Si measurements are from David Thomas.	no	0	2.6			0.28	10.7692			0.33	0.23	0.77		1.00321				1.95	1.95	0.04	4.25	6.24	0.89	1.89			7.01124	3.30159	2.1236		86.8636	86.8636	1.78182	189.318	277.964	39.6455	84.1909
ANTARKTIS XI/3	perenial ice	29/057	19940228	59	-73.1517	-121.836	N1305912	In his calculations Gerhard Dieckmann considered a diameter of 9.0cm. The corer diameter is not given in the cruise report. Salinity, NO3, NO2, NH4, PO4 and Si measurements are from David Thomas.	no	0	2.6			0.38	14.6154			0.43	0.33	1.28		0.718718				1.5	1.5	0.05	2.49	4.04	0.2	2.18			20.2	1.85321	10.9		40.1953	40.1953	1.33984	66.7242	108.259	5.35937	58.4172
ANTARKTIS XI/3	perenial ice	29/057	19940228	59	-73.1517	-121.836	N1305912	In his calculations Gerhard Dieckmann considered a diameter of 9.0cm. The corer diameter is not given in the cruise report. Salinity, NO3, NO2, NH4, PO4 and Si measurements are from David Thomas.	no	0	2.6			0.48	18.4615			0.53	0.43	1.61		0.643852				1.1	1.1	0.04	2.84	3.98	0.14	1.81			28.4286	2.1989	12.9286		23.4348	23.4348	0.852174	60.5043	84.7913	2.98261	38.5609
ANTARKTIS XI/3	perenial ice	29/057	19940228	59	-73.1517	-121.836	N1305912	In his calculations Gerhard Dieckmann considered a diameter of 9.0cm. The corer diameter is not given in the cruise report. Salinity, NO3, NO2, NH4, PO4 and Si measurements are from David Thomas.	no	0	2.6			0.565	21.7308			0.6	0.53	2.63		1.0631				0.8	0.8	0.06	1.63	2.49	0.27	2.63			9.22222	0.946768	9.74074		10.4335	10.4335	0.78251	21.2582	32.4741	3.52129	34.3
ANTARKTIS XI/3	perenial ice	29/057	19940228	59	-73.1517	-121.836	N1305912	In his calculations Gerhard Dieckmann considered a diameter of 9.0cm. The corer diameter is not given in the cruise report. Salinity, NO3, NO2, NH4, PO4 and Si measurements are from David Thomas.	no	0	2.6			0.65	25			0.7	0.6	2.68		1.88664				0.64	0.64	0.05	1.63	2.32	0.39	2.94			5.94872	0.789116	7.53846		8.19104	8.19104	0.639925	20.8616	29.6925	4.99142	37.6276
ANTARKTIS XI/3	perenial ice	29/057	19940228	59	-73.1517	-121.836	N1305912	In his calculations Gerhard Dieckmann considered a diameter of 9.0cm. The corer diameter is not given in the cruise report. Salinity, NO3, NO2, NH4, PO4 and Si measurements are from David Thomas.	no	0	2.6			0.75	28.8462			0.8	0.7	2.25		2.78503				0.72	0.72	0.05	1.53	2.3	0.33	2.4			6.9697	0.958333	7.27273		10.976	10.976	0.762222	23.324	35.0622	5.03067	36.5867
ANTARKTIS XI/3	perenial ice	29/057	19940228	59	-73.1517	-121.836	N1305912	In his calculations Gerhard Dieckmann considered a diameter of 9.0cm. The corer diameter is not given in the cruise report. Salinity, NO3, NO2, NH4, PO4 and Si measurements are from David Thomas.	no	0	2.6			0.85	32.6923			0.9	0.8	1.81		2.8599				0.62	0.62	0.04	1.44	2.1	0.35	2.16			6	0.972222	6.17143		11.7492	11.7492	0.758011	27.2884	39.7956	6.6326	40.9326
ANTARKTIS XI/3	perenial ice	29/057	19940228	59	-73.1517	-121.836	N1305912	In his calculations Gerhard Dieckmann considered a diameter of 9.0cm. The corer diameter is not given in the cruise report. Salinity, NO3, NO2, NH4, PO4 and Si measurements are from David Thomas.	no	0	2.6			0.95	36.5385			1	0.9	2.24		5.43531				0.63	0.63	0.04	1.26	1.93	0.41	1.8			4.70732	1.07222	4.39024		9.64687	9.64687	0.6125	19.2937	29.5531	6.27812	27.5625
ANTARKTIS XI/3	perenial ice	29/057	19940228	59	-73.1517	-121.836	N1305912	In his calculations Gerhard Dieckmann considered a diameter of 9.0cm. The corer diameter is not given in the cruise report. Salinity, NO3, NO2, NH4, PO4 and Si measurements are from David Thomas.	no	0	2.6			1.05	40.3846			1.1	1	2.7		4.6567				0.74	0.74	0.05	1.32	2.11	0.5	1.88			4.22	1.12234	3.76		9.40074	9.40074	0.635185	16.7689	26.8048	6.35185	23.883
ANTARKTIS XI/3	perenial ice	29/057	19940228	59	-73.1517	-121.836	N1305912	In his calculations Gerhard Dieckmann considered a diameter of 9.0cm. The corer diameter is not given in the cruise report. Salinity, NO3, NO2, NH4, PO4 and Si measurements are from David Thomas.	no	0	2.6			1.15	44.2308			1.2	1.1	3.36		10.092				0.66	0.66	0.07	1.69	2.42	0.66	1.74			3.66667	1.3908	2.63636		6.7375	6.7375	0.714583	17.2521	24.7042	6.7375	17.7625
ANTARKTIS XI/3	perenial ice	29/057	19940228	59	-73.1517	-121.836	N1305912	In his calculations Gerhard Dieckmann considered a diameter of 9.0cm. The corer diameter is not given in the cruise report. Salinity, NO3, NO2, NH4, PO4 and Si measurements are from David Thomas.	no	0	2.6			1.23	47.3077			1.26	1.2	4.25		4.6567				0.62	0.62	0.06	0.49	1.17	0.62	1.78			1.8871	0.657303	2.87097		5.00376	5.00376	0.484235	3.95459	9.44259	5.00376	14.3656
ANTARKTIS XI/3	perenial ice	29/057	19940228	59	-73.1517	-121.836	N1305912	In his calculations Gerhard Dieckmann considered a diameter of 9.0cm. The corer diameter is not given in the cruise report. Salinity, NO3, NO2, NH4, PO4 and Si measurements are from David Thomas.	no	0	2.6			1.31	50.3846			1.36	1.26	2.16		6.21392				0.75	0.75	0.06	1.66	2.47	0.75	1.3			3.29333	1.9	1.73333		11.9097	11.9097	0.952778	26.3602	39.2227	11.9097	20.6435
ANTARKTIS XI/3	perenial ice	29/057	19940228	59	-73.1517	-121.836	N1305912	In his calculations Gerhard Dieckmann considered a diameter of 9.0cm. The corer diameter is not given in the cruise report. Salinity, NO3, NO2, NH4, PO4 and Si measurements are from David Thomas.	no	0	2.6			1.41	54.2308			1.46	1.36	2.61		2.62033				0.76	0.76	0.07	1.76	2.59	0.76	1.68			3.40789	1.54167	2.21053		9.98774	9.98774	0.919923	23.1295	34.0372	9.98774	22.0782
ANTARKTIS XI/3	perenial ice	29/057	19940228	59	-73.1517	-121.836	N1305912	In his calculations Gerhard Dieckmann considered a diameter of 9.0cm. The corer diameter is not given in the cruise report. Salinity, NO3, NO2, NH4, PO4 and Si measurements are from David Thomas.	no	0	2.6			1.505	57.8846			1.55	1.46	2.82		1.9615				1.04	1.04	0.08	1.51	2.63	1.04	2.33			2.52885	1.12876	2.24038		12.6496	12.6496	0.97305	18.3663	31.989	12.6496	28.3401
ANTARKTIS XI/3	perenial ice	29/057	19940228	59	-73.1517	-121.836	N1305912	In his calculations Gerhard Dieckmann considered a diameter of 9.0cm. The corer diameter is not given in the cruise report. Salinity, NO3, NO2, NH4, PO4 and Si measurements are from David Thomas.	no	0	2.6			1.6	61.5385			1.65	1.55	2.19		1.30268				1.49	1.49	0.09	2.21	3.79	0.21	2.53			18.0476	1.49802	12.0476		23.3365	23.3365	1.40959	34.6132	59.3594	3.28904	39.6251
ANTARKTIS XI/3	perenial ice	29/057	19940228	59	-73.1517	-121.836	N1305912	In his calculations Gerhard Dieckmann considered a diameter of 9.0cm. The corer diameter is not given in the cruise report. Salinity, NO3, NO2, NH4, PO4 and Si measurements are from David Thomas.	no	0	2.6			1.7	65.3846			1.75	1.65	1.43		0.988238				1.34	1.34	0.07	2.07	3.48	0.19	1.71			18.3158	2.03509	9		32.1413	32.1413	1.67902	49.651	83.4713	4.55734	41.0161
ANTARKTIS XI/3	perenial ice	29/057	19940228	59	-73.1517	-121.836	N1305912	In his calculations Gerhard Dieckmann considered a diameter of 9.0cm. The corer diameter is not given in the cruise report. Salinity, NO3, NO2, NH4, PO4 and Si measurements are from David Thomas.	no	0	2.6			1.8	69.2308			1.85	1.75	1.9		1.46738				1.35	1.35	0.07	2.05	3.47	0.19	1.98			18.2632	1.75253	10.4211		24.3711	24.3711	1.26368	37.0079	62.6426	3.43	35.7442
ANTARKTIS XI/3	perenial ice	29/057	19940228	59	-73.1517	-121.836	N1305912	In his calculations Gerhard Dieckmann considered a diameter of 9.0cm. The corer diameter is not given in the cruise report. Salinity, NO3, NO2, NH4, PO4 and Si measurements are from David Thomas.	no	0	2.6			1.9	73.0769			1.95	1.85	2.46		2.12621				1.67	1.67	0.08	2.93	4.68	0.21	2.58			22.2857	1.81395	12.2857		23.285	23.285	1.11545	40.8533	65.2537	2.92805	35.9732
ANTARKTIS XI/3	perenial ice	29/057	19940228	59	-73.1517	-121.836	N1305912	In his calculations Gerhard Dieckmann considered a diameter of 9.0cm. The corer diameter is not given in the cruise report. Salinity, NO3, NO2, NH4, PO4 and Si measurements are from David Thomas.	no	0	2.6			2	76.9231			2.05	1.95	3.4		1.7968				2.39	2.39	0.06	2.04	4.49	0.28	5.65			16.0357	0.79469	20.1786		24.1109	24.1109	0.605294	20.58	45.2962	2.82471	56.9985
ANTARKTIS XI/3	perenial ice	29/057	19940228	59	-73.1517	-121.836	N1305912	In his calculations Gerhard Dieckmann considered a diameter of 9.0cm. The corer diameter is not given in the cruise report. Salinity, NO3, NO2, NH4, PO4 and Si measurements are from David Thomas.	no	0	2.6			2.1	80.7692			2.15	2.05	3.25		3.09947				2.31	2.31	0.06	1.34	3.71	0.36	5.77			10.3056	0.642981	16.0278		24.3794	24.3794	0.633231	14.1422	39.1548	3.79938	60.8957
ANTARKTIS XI/3	perenial ice	29/057	19940228	59	-73.1517	-121.836	N1305912	In his calculations Gerhard Dieckmann considered a diameter of 9.0cm. The corer diameter is not given in the cruise report. Salinity, NO3, NO2, NH4, PO4 and Si measurements are from David Thomas.	no	0	2.6			2.2	84.6154			2.25	2.15	3.44		1.0631				2.25	2.25	0.05	1.95	4.25	0.3	5.83			14.1667	0.728988	19.4333		22.4346	22.4346	0.498547	19.4433	42.3765	2.99128	58.1305
ANTARKTIS XI/3	perenial ice	29/057	19940228	59	-73.1517	-121.836	N1305912	In his calculations Gerhard Dieckmann considered a diameter of 9.0cm. The corer diameter is not given in the cruise report. Salinity, NO3, NO2, NH4, PO4 and Si measurements are from David Thomas.	no	0	2.6			2.3	88.4615			2.35	2.25	2.82		2.20108				2.22	2.22	0.05	1.51	3.78	0.25	5.02			15.12	0.752988	20.08		27.0021	27.0021	0.608156	18.3663	45.9766	3.04078	61.0589
ANTARKTIS XI/3	perenial ice	29/057	19940228	59	-73.1517	-121.836	N1305912	In his calculations Gerhard Dieckmann considered a diameter of 9.0cm. The corer diameter is not given in the cruise report. Salinity, NO3, NO2, NH4, PO4 and Si measurements are from David Thomas.	no	0	2.6			2.4	92.3077			2.45	2.35	3.17		4.40215				2.23	2.23	0.05	1.53	3.81	0.31	5.03			12.2903	0.757455	16.2258		24.129	24.129	0.541009	16.5549	41.2249	3.35426	54.4256
ANTARKTIS XI/3	perenial ice	29/057	19940228	59	-73.1517	-121.836	N1305912	In his calculations Gerhard Dieckmann considered a diameter of 9.0cm. The corer diameter is not given in the cruise report. Salinity, NO3, NO2, NH4, PO4 and Si measurements are from David Thomas.	no	0	2.6			2.5	96.1538			2.55	2.45	2.06		3.50375				1.4	1.4	0.04	0.99	2.43	0.2	2.97			12.15	0.818182	14.85		23.3107	23.3107	0.666019	16.484	40.4607	3.3301	49.4519
ANTARKTIS XI/3	perenial ice	29/057	19940228	59	-73.1517	-121.836	N1305912	In his calculations Gerhard Dieckmann considered a diameter of 9.0cm. The corer diameter is not given in the cruise report. Salinity, NO3, NO2, NH4, PO4 and Si measurements are from David Thomas.	no	0	2.6			2.575	99.0385			2.6	2.55	1.9		3.36899				1.35	1.35	0.05	2.19	3.59	0.23	2.46			15.6087	1.45935	10.6957		24.3711	24.3711	0.902632	39.5353	64.8089	4.15211	44.4095
ANTARKTIS XI/3	perenial ice	29/061	19940301	61	-72.5517	-121.051	N1306002	In his calculations Gerhard Dieckmann considered a diameter of 9.0cm. The corer diameter is not given in the cruise report. Salinity, NO3, NO2, NH4, PO4 and Si measurements are from David Thomas.	no	1	1.3			0.05	3.84615			0.1	0	0.89		0.389306				0.56	0.56	0.05	1.64	2.25	0.1	0.83			22.5	2.71084	8.3		21.582	21.582	1.92697	63.2045	86.7135	3.85393	31.9876
ANTARKTIS XI/3	perenial ice	29/061	19940301	61	-72.5517	-121.051	N1306002	In his calculations Gerhard Dieckmann considered a diameter of 9.0cm. The corer diameter is not given in the cruise report. Salinity, NO3, NO2, NH4, PO4 and Si measurements are from David Thomas.	no	0	1.3			0.15	11.5385			0.2	0.1	0.63		0.389306				0.34	0.34	0.05	1.19	1.58	0.07	1.01			22.5714	1.56436	14.4286		18.5111	18.5111	2.72222	64.7889	86.0222	3.81111	54.9889
ANTARKTIS XI/3	perenial ice	29/061	19940301	61	-72.5517	-121.051	N1306002	In his calculations Gerhard Dieckmann considered a diameter of 9.0cm. The corer diameter is not given in the cruise report. Salinity, NO3, NO2, NH4, PO4 and Si measurements are from David Thomas.	no	0	1.3			0.25	19.2308			0.3	0.2	2.3		3.02461				0.44	0.44	0.05	3.59	4.08	0.27	1.17			15.1111	3.48718	4.33333		6.56174	6.56174	0.745652	53.5378	60.8452	4.02652	17.4483
ANTARKTIS XI/3	perenial ice	29/061	19940301	61	-72.5517	-121.051	N1306002	In his calculations Gerhard Dieckmann considered a diameter of 9.0cm. The corer diameter is not given in the cruise report. Salinity, NO3, NO2, NH4, PO4 and Si measurements are from David Thomas.	no	0	1.3			0.35	26.9231			0.4	0.3	6.64		11.9038				0.46	0.46	0.08	2.99	3.53	0.35	2.17			10.0857	1.62673	6.2		2.3762	2.3762	0.413253	15.4453	18.2348	1.80798	11.2095
ANTARKTIS XI/3	perenial ice	29/061	19940301	61	-72.5517	-121.051	N1306002	In his calculations Gerhard Dieckmann considered a diameter of 9.0cm. The corer diameter is not given in the cruise report. Salinity, NO3, NO2, NH4, PO4 and Si measurements are from David Thomas.	no	0	1.3			0.45	34.6154			0.5	0.4	4.45		3.42889				0.74	0.74	0.05	3.05	3.84	0.6	1.5			6.4	2.56	2.5		5.70382	5.70382	0.385393	23.509	29.5982	4.62472	11.5618
ANTARKTIS XI/3	perenial ice	29/061	19940301	61	-72.5517	-121.051	N1306002	In his calculations Gerhard Dieckmann considered a diameter of 9.0cm. The corer diameter is not given in the cruise report. Salinity, NO3, NO2, NH4, PO4 and Si measurements are from David Thomas.	no	0	1.3			0.55	42.3077			0.6	0.5	4		2.8599				0.34	0.34	0.05	2.13	2.52	3.65	1.34			0.690411	1.8806	0.367123		2.9155	2.9155	0.42875	18.2647	21.609	31.2987	11.4905
ANTARKTIS XI/3	perenial ice	29/061	19940301	61	-72.5517	-121.051	N1306002	In his calculations Gerhard Dieckmann considered a diameter of 9.0cm. The corer diameter is not given in the cruise report. Salinity, NO3, NO2, NH4, PO4 and Si measurements are from David Thomas.	no	0	1.3			0.65	50			0.7	0.6	4.37		4.40215				0.42	0.42	0.04	9.54	10	0.22	1.47			45.4545	6.80272	6.68182		3.29657	3.29657	0.313959	74.8792	78.4897	1.72677	11.538
ANTARKTIS XI/3	perenial ice	29/061	19940301	61	-72.5517	-121.051	N1306002	In his calculations Gerhard Dieckmann considered a diameter of 9.0cm. The corer diameter is not given in the cruise report. Salinity, NO3, NO2, NH4, PO4 and Si measurements are from David Thomas.	no	0	1.3			0.75	57.6923			0.8	0.7	5.06		5.95937				0.37	0.37	0.06	3.07	3.5	0.29	2.82			12.069	1.24113	9.72414		2.5081	2.5081	0.406719	20.8105	23.7253	1.96581	19.1158
ANTARKTIS XI/3	perenial ice	29/061	19940301	61	-72.5517	-121.051	N1306002	In his calculations Gerhard Dieckmann considered a diameter of 9.0cm. The corer diameter is not given in the cruise report. Salinity, NO3, NO2, NH4, PO4 and Si measurements are from David Thomas.	no	0	1.3			0.85	65.3846			0.9	0.8	5.22		9.05885				0.62	0.62	0.05	2.08	2.75	0.26	2.41			10.5769	1.14108	9.26923		4.07395	4.07395	0.328544	13.6674	18.0699	1.70843	15.8358
ANTARKTIS XI/3	perenial ice	29/061	19940301	61	-72.5517	-121.051	N1306002	In his calculations Gerhard Dieckmann considered a diameter of 9.0cm. The corer diameter is not given in the cruise report. Salinity, NO3, NO2, NH4, PO4 and Si measurements are from David Thomas.	no	0	1.3			0.95	73.0769			1	0.9	6.41		40.8921				1.2	1.2	0.06	3.06	4.32	0.45	2.5			9.6	1.728	5.55556		6.42122	6.42122	0.321061	16.3741	23.1164	2.40796	13.3775
ANTARKTIS XI/3	perenial ice	29/061	19940301	61	-72.5517	-121.051	N1306002	In his calculations Gerhard Dieckmann considered a diameter of 9.0cm. The corer diameter is not given in the cruise report. Salinity, NO3, NO2, NH4, PO4 and Si measurements are from David Thomas.	no	0	1.3			1.025	78.8462			1.05	1	9.08		27.8054				5.19	5.19	0.09	5.64	10.92	1.28	12.99			8.53125	0.840647	10.1484		19.6054	19.6054	0.339978	21.3053	41.2507	4.83524	49.0702
ANTARKTIS XI/3	perenial ice	29/061	19940301	61	-72.5517	-121.051	N1306002	In his calculations Gerhard Dieckmann considered a diameter of 9.0cm. The corer diameter is not given in the cruise report. Salinity, NO3, NO2, NH4, PO4 and Si measurements are from David Thomas.	no	0	1.3			1.1	84.6154			1.15	1.05	6.99		56.9285				3.95	3.95	0.07	3.91	7.93	3.13	11.18			2.53355	0.709302	3.57188		19.3827	19.3827	0.343491	19.1864	38.9126	15.3589	54.8604
ANTARKTIS XI/3	perenial ice	29/061	19940301	61	-72.5517	-121.051	N1306002	In his calculations Gerhard Dieckmann considered a diameter of 9.0cm. The corer diameter is not given in the cruise report. Salinity, NO3, NO2, NH4, PO4 and Si measurements are from David Thomas.	no	0	1.3			1.2	92.3077			1.25	1.15	6.47		34.3488				3.62	3.62	0.06	1.58	5.26	0.77	8.77			6.83117	0.599772	11.3896		19.191	19.191	0.318083	8.3762	27.8853	4.08207	46.4932
ANTARKTIS XI/3	perenial ice	29/061	19940301	61	-72.5517	-121.051	N1306002	In his calculations Gerhard Dieckmann considered a diameter of 9.0cm. The corer diameter is not given in the cruise report. Salinity, NO3, NO2, NH4, PO4 and Si measurements are from David Thomas.	no	0	1.3			1.275	98.0769			1.3	1.25	6.41		64.6996				3.88	3.88	0.07	2.92	6.87	0.86	11.09			7.98837	0.619477	12.8953		20.7619	20.7619	0.374571	15.625	36.7615	4.60187	59.3427
ANTARKTIS XI/3	perenial ice	29/061	19940301	61	-72.5517	-121.051	N1306012	In his calculations Gerhard Dieckmann considered a diameter of 9.0cm. The corer diameter is not given in the cruise report. Salinity, NO3, NO2, NH4, PO4 and Si measurements are from David Thomas.	no	1	4.32			0.54	12.5			0.59	0.49	0.52		0.2246				0.71	0.71	0.04	4.7	5.45	0.04	2.55			136.25	2.13725	63.75		46.8327	46.8327	2.63846	310.019	359.49	2.63846	168.202
ANTARKTIS XI/3	perenial ice	29/061	19940301	61	-72.5517	-121.051	N1306012	In his calculations Gerhard Dieckmann considered a diameter of 9.0cm. The corer diameter is not given in the cruise report. Salinity, NO3, NO2, NH4, PO4 and Si measurements are from David Thomas.	no	0	4.32			0.64	14.8148			0.69	0.59	0.79		0.374333				0.53	0.53	0.04	3.3	3.87	0.05	2.84			77.4	1.36268	56.8		23.0114	23.0114	1.73671	143.278	168.027	2.17089	123.306
ANTARKTIS XI/3	perenial ice	29/061	19940301	61	-72.5517	-121.051	N1306012	In his calculations Gerhard Dieckmann considered a diameter of 9.0cm. The corer diameter is not given in the cruise report. Salinity, NO3, NO2, NH4, PO4 and Si measurements are from David Thomas.	no	0	4.32			0.74	17.1296			0.79	0.69	0.6		0.613905				0.65	0.65	0.05	2.68	3.38	0.11	2.76			30.7273	1.22464	25.0909		37.1583	37.1583	2.85833	153.207	193.223	6.28833	157.78
ANTARKTIS XI/3	perenial ice	29/061	19940301	61	-72.5517	-121.051	N1306012	In his calculations Gerhard Dieckmann considered a diameter of 9.0cm. The corer diameter is not given in the cruise report. Salinity, NO3, NO2, NH4, PO4 and Si measurements are from David Thomas.	no	0	4.32			0.84	19.4444			0.89	0.79	1.1		1.10802				0.41	0.41	0.04	7.05	7.5	0.09	2.67			83.3333	2.80899	29.6667		12.7845	12.7845	1.24727	219.832	233.864	2.80636	83.2555
ANTARKTIS XI/3	perenial ice	29/061	19940301	61	-72.5517	-121.051	N1306012	In his calculations Gerhard Dieckmann considered a diameter of 9.0cm. The corer diameter is not given in the cruise report. Salinity, NO3, NO2, NH4, PO4 and Si measurements are from David Thomas.	no	0	4.32			0.94	21.7593			0.99	0.89	2.02		1.63209				0.47	0.47	0.05	2.67	3.19	0.14	2.96			22.7857	1.0777	21.1429		7.98069	7.98069	0.84901	45.3371	54.1668	2.37723	50.2614
ANTARKTIS XI/3	perenial ice	29/061	19940301	61	-72.5517	-121.051	N1306012	In his calculations Gerhard Dieckmann considered a diameter of 9.0cm. The corer diameter is not given in the cruise report. Salinity, NO3, NO2, NH4, PO4 and Si measurements are from David Thomas.	no	0	4.32			1.05	24.3056			1.11	0.99	1.28		1.13797				0.71	0.71	0.06	2.8	3.57	1.13	2.73			3.15929	1.30769	2.41593		19.0258	19.0258	1.60781	75.0312	95.6648	30.2805	73.1555
ANTARKTIS XI/3	perenial ice	29/061	19940301	61	-72.5517	-121.051	N1306012	In his calculations Gerhard Dieckmann considered a diameter of 9.0cm. The corer diameter is not given in the cruise report. Salinity, NO3, NO2, NH4, PO4 and Si measurements are from David Thomas.	no	0	4.32			1.16	26.8519			1.21	1.11	1.71		1.67701				0.66	0.66	0.05	2.65	3.36	0.07	3.03			48	1.10891	43.2857		13.2386	13.2386	1.00292	53.155	67.3965	1.40409	60.7772
ANTARKTIS XI/3	perenial ice	29/061	19940301	61	-72.5517	-121.051	N1306012	In his calculations Gerhard Dieckmann considered a diameter of 9.0cm. The corer diameter is not given in the cruise report. Salinity, NO3, NO2, NH4, PO4 and Si measurements are from David Thomas.	no	0	4.32			1.26	29.1667			1.31	1.21	1.01		1.9615				0.24	0.24	0.05	2.63	2.92	0.25	2.49			11.68	1.17269	9.96		8.1505	8.1505	1.69802	89.3158	99.1644	8.4901	84.5614
ANTARKTIS XI/3	perenial ice	29/061	19940301	61	-72.5517	-121.051	N1306012	In his calculations Gerhard Dieckmann considered a diameter of 9.0cm. The corer diameter is not given in the cruise report. Salinity, NO3, NO2, NH4, PO4 and Si measurements are from David Thomas.	no	0	4.32			1.36	31.4815			1.41	1.31	1.07		2.12621				0.35	0.35	0.04	2.23	2.62	0.05	2.4			52.4	1.09167	48		11.2196	11.2196	1.28224	71.485	83.9869	1.6028	76.9346
ANTARKTIS XI/3	perenial ice	29/061	19940301	61	-72.5517	-121.051	N1306012	In his calculations Gerhard Dieckmann considered a diameter of 9.0cm. The corer diameter is not given in the cruise report. Salinity, NO3, NO2, NH4, PO4 and Si measurements are from David Thomas.	no	0	4.32			1.46	33.7963			1.51	1.41	1.27		5.18076				0.25	0.25	0.04	1.78	2.07	0.07	2.47			29.5714	0.838057	35.2857		6.75197	6.75197	1.08031	48.074	55.9063	1.89055	66.7094
ANTARKTIS XI/3	perenial ice	29/061	19940301	61	-72.5517	-121.051	N1306012	In his calculations Gerhard Dieckmann considered a diameter of 9.0cm. The corer diameter is not given in the cruise report. Salinity, NO3, NO2, NH4, PO4 and Si measurements are from David Thomas.	no	0	4.32			1.56	36.1111			1.61	1.51	1.98		6.46847				0.1	0.1	0.05	1.18	1.33	0.11	2.84			12.0909	0.46831	25.8182		1.73232	1.73232	0.866162	20.4414	23.0399	1.90556	49.198
ANTARKTIS XI/3	perenial ice	29/061	19940301	61	-72.5517	-121.051	N1306012	In his calculations Gerhard Dieckmann considered a diameter of 9.0cm. The corer diameter is not given in the cruise report. Salinity, NO3, NO2, NH4, PO4 and Si measurements are from David Thomas.	no	0	4.32			1.66	38.4259			1.71	1.61	2.48		5.82461				0.5	0.5	0.05	1.12	1.67	0.11	2.91			15.1818	0.573883	26.4545		6.91532	6.91532	0.691532	15.4903	23.0972	1.52137	40.2472
ANTARKTIS XI/3	perenial ice	29/061	19940301	61	-72.5517	-121.051	N1306012	In his calculations Gerhard Dieckmann considered a diameter of 9.0cm. The corer diameter is not given in the cruise report. Salinity, NO3, NO2, NH4, PO4 and Si measurements are from David Thomas.	no	0	4.32			1.76	40.7407			1.81	1.71	3.24		7.77114				0.7	0.7	0.05	1.73	2.48	0.17	3.53			14.5882	0.70255	20.7647		7.41049	7.41049	0.529321	18.3145	26.2543	1.79969	37.3701
ANTARKTIS XI/3	perenial ice	29/061	19940301	61	-72.5517	-121.051	N1306012	In his calculations Gerhard Dieckmann considered a diameter of 9.0cm. The corer diameter is not given in the cruise report. Salinity, NO3, NO2, NH4, PO4 and Si measurements are from David Thomas.	no	0	4.32			1.87	43.287			1.93	1.81	4.51		26.9819				0.5	0.5	0.05	2.09	2.64	0.34	3.84			7.76471	0.6875	11.2941		3.80266	3.80266	0.380266	15.8951	20.078	2.58581	29.2044
ANTARKTIS XI/3	perenial ice	29/061	19940301	61	-72.5517	-121.051	N1306012	In his calculations Gerhard Dieckmann considered a diameter of 9.0cm. The corer diameter is not given in the cruise report. Salinity, NO3, NO2, NH4, PO4 and Si measurements are from David Thomas.	no	0	4.32			1.99	46.0648			2.05	1.93	5.5		39.26				2.65	2.65	0.08	2.74	5.47	0.48	4.23			11.3958	1.29314	8.8125		16.5264	16.5264	0.498909	17.0876	34.1129	2.99345	26.3798
ANTARKTIS XI/3	perenial ice	29/061	19940301	61	-72.5517	-121.051	N1306012	In his calculations Gerhard Dieckmann considered a diameter of 9.0cm. The corer diameter is not given in the cruise report. Salinity, NO3, NO2, NH4, PO4 and Si measurements are from David Thomas.	no	0	4.32			2.1	48.6111			2.15	2.05	5.16		39.26				3.85	3.85	0.07	2.21	6.13	1	5.33			6.13	1.15009	5.33		25.5921	25.5921	0.46531	14.6905	40.7479	6.64729	35.43
ANTARKTIS XI/3	perenial ice	29/061	19940301	61	-72.5517	-121.051	N1306012	In his calculations Gerhard Dieckmann considered a diameter of 9.0cm. The corer diameter is not given in the cruise report. Salinity, NO3, NO2, NH4, PO4 and Si measurements are from David Thomas.	no	0	4.32			2.2	50.9259			2.25	2.15	5.77		18.4022				3.62	3.62	0.05	4.86	8.53	0.58	7.31			14.7069	1.16689	12.6034		21.5192	21.5192	0.297227	28.8905	50.7069	3.44783	43.4546
ANTARKTIS XI/3	perenial ice	29/061	19940301	61	-72.5517	-121.051	N1306012	In his calculations Gerhard Dieckmann considered a diameter of 9.0cm. The corer diameter is not given in the cruise report. Salinity, NO3, NO2, NH4, PO4 and Si measurements are from David Thomas.	no	0	4.32			2.3	53.2407			2.35	2.25	6.64		14.7188				4.66	4.66	0.07	2.15	6.88	1.2	9.79			5.73333	0.702758	8.15833		24.072	24.072	0.361596	11.1062	35.5398	6.1988	50.5718
ANTARKTIS XI/3	perenial ice	29/061	19940301	61	-72.5517	-121.051	N1306012	In his calculations Gerhard Dieckmann considered a diameter of 9.0cm. The corer diameter is not given in the cruise report. Salinity, NO3, NO2, NH4, PO4 and Si measurements are from David Thomas.	no	0	4.32			2.4	55.5556			2.45	2.35	7.33		13.0867				5	5	0.09	2.85	7.94	0.88	10.06			9.02273	0.789264	11.4318		23.397	23.397	0.421146	13.3363	37.1544	4.11787	47.0748
ANTARKTIS XI/3	perenial ice	29/061	19940301	61	-72.5517	-121.051	N1306012	In his calculations Gerhard Dieckmann considered a diameter of 9.0cm. The corer diameter is not given in the cruise report. Salinity, NO3, NO2, NH4, PO4 and Si measurements are from David Thomas.	no	0	4.32			2.5	57.8704			2.55	2.45	10.7		13.0867				5.34	5.34	0.09	4.31	9.74	0.59	13.13			16.5085	0.741813	22.2542		17.1179	17.1179	0.288505	13.8162	31.2226	1.89131	42.0896
ANTARKTIS XI/3	perenial ice	29/061	19940301	61	-72.5517	-121.051	N1306012	In his calculations Gerhard Dieckmann considered a diameter of 9.0cm. The corer diameter is not given in the cruise report. Salinity, NO3, NO2, NH4, PO4 and Si measurements are from David Thomas.	no	0	4.32			2.6	60.1852			2.65	2.55	6.56		8.99895				4.49	4.49	0.07	5.59	10.15	0.39	9.21			26.0256	1.10206	23.6154		23.4767	23.4767	0.366006	29.2282	53.0709	2.03918	48.1559
ANTARKTIS XI/3	perenial ice	29/061	19940301	61	-72.5517	-121.051	N1306012	In his calculations Gerhard Dieckmann considered a diameter of 9.0cm. The corer diameter is not given in the cruise report. Salinity, NO3, NO2, NH4, PO4 and Si measurements are from David Thomas.	no	0	4.32			2.7	62.5			2.75	2.65	4.93		3.87808				3.3	3.3	0.08	5	8.38	0.28	7.2			29.9286	1.16389	25.7143		22.9594	22.9594	0.556592	34.787	58.303	1.94807	50.0933
ANTARKTIS XI/3	perenial ice	29/061	19940301	61	-72.5517	-121.051	N1306012	In his calculations Gerhard Dieckmann considered a diameter of 9.0cm. The corer diameter is not given in the cruise report. Salinity, NO3, NO2, NH4, PO4 and Si measurements are from David Thomas.	no	0	4.32			2.8	64.8148			2.85	2.75	4.8		1.88664				3.44	3.44	0.08	2.16	5.68	0.26	7.29			21.8462	0.77915	28.0385		24.5817	24.5817	0.571667	15.435	40.5883	1.85792	52.0931
ANTARKTIS XI/3	perenial ice	29/061	19940301	61	-72.5517	-121.051	N1306012	In his calculations Gerhard Dieckmann considered a diameter of 9.0cm. The corer diameter is not given in the cruise report. Salinity, NO3, NO2, NH4, PO4 and Si measurements are from David Thomas.	no	0	4.32			2.9	67.1296			2.95	2.85	4.41		1.27273				3.38	3.38	0.07	1.99	5.44	0.23	7.22			23.6522	0.753463	31.3913		26.2889	26.2889	0.544444	15.4778	42.3111	1.78889	56.1556
ANTARKTIS XI/3	perenial ice	29/061	19940301	61	-72.5517	-121.051	N1306012	In his calculations Gerhard Dieckmann considered a diameter of 9.0cm. The corer diameter is not given in the cruise report. Salinity, NO3, NO2, NH4, PO4 and Si measurements are from David Thomas.	no	0	4.32			3	69.4444			3.05	2.95	4.12		1.01818				3.13	3.13	0.08	2.62	5.83	0.28	6.17			20.8214	0.944895	22.0357		26.058	26.058	0.666019	21.8121	48.5362	2.33107	51.3667
ANTARKTIS XI/3	perenial ice	29/061	19940301	61	-72.5517	-121.051	N1306012	In his calculations Gerhard Dieckmann considered a diameter of 9.0cm. The corer diameter is not given in the cruise report. Salinity, NO3, NO2, NH4, PO4 and Si measurements are from David Thomas.	no	0	4.32			3.1	71.7593			3.15	3.05	3.58		1.18289				2.65	2.65	0.06	1.25	3.96	0.13	5.66			30.4615	0.699647	43.5385		25.3897	25.3897	0.57486	11.9763	37.9408	1.24553	54.2285
ANTARKTIS XI/3	perenial ice	29/061	19940301	61	-72.5517	-121.051	N1306012	In his calculations Gerhard Dieckmann considered a diameter of 9.0cm. The corer diameter is not given in the cruise report. Salinity, NO3, NO2, NH4, PO4 and Si measurements are from David Thomas.	no	0	4.32			3.22	74.537			3.29	3.15	3.86		1.18289				2.9	2.9	0.07	3.01	5.98	0.18	5.99			33.2222	0.998331	33.2778		25.7694	25.7694	0.622021	26.7469	53.1383	1.59948	53.2272
ANTARKTIS XI/3	perenial ice	29/061	19940301	61	-72.5517	-121.051	N1306012	In his calculations Gerhard Dieckmann considered a diameter of 9.0cm. The corer diameter is not given in the cruise report. Salinity, NO3, NO2, NH4, PO4 and Si measurements are from David Thomas.	no	0	4.32			3.34	77.3148			3.39	3.29	6.91		1.0631				5	5	0.09	3.01	8.1	0.38	10.64			21.3158	0.761278	28		24.8191	24.8191	0.446744	14.9411	40.2069	1.88625	52.8151
ANTARKTIS XI/3	perenial ice	29/061	19940301	61	-72.5517	-121.051	N1306012	In his calculations Gerhard Dieckmann considered a diameter of 9.0cm. The corer diameter is not given in the cruise report. Salinity, NO3, NO2, NH4, PO4 and Si measurements are from David Thomas.	no	0	4.32			3.445	79.7454			3.5	3.39	8.55		0.898398				6.24	6.24	0.11	5.17	11.52	0.47	12.93			24.5106	0.890951	27.5106		25.033	25.033	0.441287	20.7405	46.2147	1.8855	51.8712
ANTARKTIS XI/3	perenial ice	29/061	19940301	61	-72.5517	-121.051	N1306012	In his calculations Gerhard Dieckmann considered a diameter of 9.0cm. The corer diameter is not given in the cruise report. Salinity, NO3, NO2, NH4, PO4 and Si measurements are from David Thomas.	no	0	4.32			3.575	82.7546			3.65	3.5	9.82		0.733692				7.28	7.28	0.13	2.9	10.31	1.09	15.09			9.45872	0.683234	13.844		25.4281	25.4281	0.454073	10.1293	36.0115	3.80723	52.7074
ANTARKTIS XI/3	perenial ice	29/061	19940301	61	-72.5517	-121.051	N1306012	In his calculations Gerhard Dieckmann considered a diameter of 9.0cm. The corer diameter is not given in the cruise report. Salinity, NO3, NO2, NH4, PO4 and Si measurements are from David Thomas.	no	0	4.32			3.725	86.2269			3.8	3.65	9.72		0.568985				7.16	7.16	0.13	2.33	9.62	0.61	15.09			15.7705	0.637508	24.7377		25.2663	25.2663	0.458745	8.22212	33.9471	2.15257	53.2497
ANTARKTIS XI/3	perenial ice	29/061	19940301	61	-72.5517	-121.051	N1306012	In his calculations Gerhard Dieckmann considered a diameter of 9.0cm. The corer diameter is not given in the cruise report. Salinity, NO3, NO2, NH4, PO4 and Si measurements are from David Thomas.	no	0	4.32			3.855	89.2361			3.91	3.8	7.59		0.524065				5.76	5.76	0.11	2.95	8.82	0.34	11.75			25.9412	0.750638	34.5588		26.03	26.03	0.497101	13.3314	39.8585	1.5365	53.0995
ANTARKTIS XI/3	perenial ice	29/061	19940301	61	-72.5517	-121.051	N1306012	In his calculations Gerhard Dieckmann considered a diameter of 9.0cm. The corer diameter is not given in the cruise report. Salinity, NO3, NO2, NH4, PO4 and Si measurements are from David Thomas.	no	0	4.32			3.965	91.7824			4.02	3.91	8.92		0.494119				6.51	6.51	0.1	1.21	7.82	0.49	13.81			15.9592	0.566256	28.1837		25.0328	25.0328	0.384529	4.6528	30.0702	1.88419	53.1035
ANTARKTIS XI/3	perenial ice	29/061	19940301	61	-72.5517	-121.051	N1306012	In his calculations Gerhard Dieckmann considered a diameter of 9.0cm. The corer diameter is not given in the cruise report. Salinity, NO3, NO2, NH4, PO4 and Si measurements are from David Thomas.	no	0	4.32			4.17	96.5278			4.32	4.02	6.87		0.359359				5.6	5.6	0.09	1.3	6.99	0.49	10.61			14.2653	0.658812	21.6531		27.9592	27.9592	0.449345	6.49054	34.8991	2.44643	52.9728
ANTARKTIS XIV/3	perenial ice	N1401803	19970118	18	-72.52	-19.12	N1401803	also phaeopigments, d13C, bacterial abundance, and platelet ice available	no	1	2.2			2.15	97.7273			2.2	2.1	8		312.55	1582.32	144.03		9.465	9.465	0.135	7.6	17.2	1.12	44.2	202.34	3.29	15.3571	0.38914	39.4643		40.5812	40.5812	0.578812	32.585	73.745	4.802	189.507
ANTARKTIS XIV/3	perenial ice	N1401803	19970118	18	-72.52	-19.12	N1401803	also phaeopigments, d13C, bacterial abundance, and platelet ice available	no	0	2.2			2.17	98.6364			2.2	2.14	10.2		227.36	727.78	13.44		8.875	8.875	0.207	15.6	24.682	2.995	8.14	214.27	2.25	8.24107	3.03219	2.71786		29.8444	29.8444	0.696088	52.4588	82.9993	10.0714	27.3727
ANTARKTIS XIV/3	perenial ice	N1401803	19970118	18	-72.52	-19.12	N1401803	also phaeopigments, d13C, bacterial abundance, and platelet ice available	no	0	2.2			2.05	93.1818			2.1	2	4.4		31.36				6.87	6.87	0.12	1.59	8.58	0.92	8.84	374.65	18.53	9.32609	0.970588	9.6087		53.5548	53.5548	0.935455	12.3948	66.885	7.17182	68.9118
ANTARKTIS XIV/3	perenial ice	N1401803	19970118	18	-72.52	-19.12	N1401803	also phaeopigments, d13C, bacterial abundance, and platelet ice available	no	0	2.2			1.95	88.6364			2	1.9	4.4		5.458	86.03	10.81		1.06	1.06	0.1	0.85	2.01	0.11	1.71	123.04	11.69	18.2727	1.17544	15.5455		8.26318	8.26318	0.779545	6.62614	15.6689	0.8575	13.3302
ANTARKTIS XIV/3	perenial ice	N1401803	19970118	18	-72.52	-19.12	N1401803	also phaeopigments, d13C, bacterial abundance, and platelet ice available	no	0	2.2			1.85	84.0909			1.9	1.8	4.8		5.174				0.905	0.905	0.1	0.57	1.575	0.055	2.155	192.83	17.74	28.6364	0.730858	39.1818		6.46698	6.46698	0.714583	4.07313	11.2547	0.393021	15.3993
ANTARKTIS XIV/3	perenial ice	N1401803	19970118	18	-72.52	-19.12	N1401803	also phaeopigments, d13C, bacterial abundance, and platelet ice available	no	0	2.2			1.75	79.5455			1.8	1.7	4.6		2.729	72.24	7.09		0.145	0.145	0.07	0.065	0.28	0.02	2.09	76.62	6.07	14	0.133971	104.5		1.0812	1.0812	0.521957	0.484674	2.08783	0.14913	15.5841
ANTARKTIS XIV/3	perenial ice	N1401803	19970118	18	-72.52	-19.12	N1401803	also phaeopigments, d13C, bacterial abundance, and platelet ice available	no	0	2.2			1.65	75			1.7	1.6	4.1		1.098				0.15	0.15	0.09	0.3	0.54	0.01	1.03	38.94	7.63	54	0.524272	103		1.25488	1.25488	0.752927	2.50976	4.51756	0.0836585	8.61683
ANTARKTIS XIV/3	perenial ice	N1401803	19970118	18	-72.52	-19.12	N1401803	also phaeopigments, d13C, bacterial abundance, and platelet ice available	no	0	2.2			1.55	70.4545			1.6	1.5	4		0.546				0.44	0.44	0.06	0.01	0.51	0.08	0.735	82.47	8.49	6.375	0.693878	9.1875		3.773	3.773	0.5145	0.08575	4.37325	0.686	6.30262
ANTARKTIS XIV/3	perenial ice	N1401803	19970118	18	-72.52	-19.12	N1401803	also phaeopigments, d13C, bacterial abundance, and platelet ice available	no	0	2.2			1.45	65.9091			1.5	1.4	3.6		0.521	64.35	7.11		0.555	0.555	0.06	0.54	1.155	0.05	0.58	66.57	3.29	23.1	1.99138	11.6		5.28792	5.28792	0.571667	5.145	11.0046	0.476389	5.52611
ANTARKTIS XIV/3	perenial ice	N1401803	19970118	18	-72.52	-19.12	N1401803	also phaeopigments, d13C, bacterial abundance, and platelet ice available	no	0	2.2			1.35	61.3636			1.4	1.3	3.9		0.571	64.58	5.53		0.43	0.43	0.07	0.855	1.355	0.07	0.68	66.53	11.21	19.3571	1.99265	9.71429		3.78179	3.78179	0.615641	7.51962	11.9171	0.615641	5.98051
ANTARKTIS XIV/3	perenial ice	N1401803	19970118	18	-72.52	-19.12	N1401803	also phaeopigments, d13C, bacterial abundance, and platelet ice available	no	0	2.2			1.25	56.8182			1.3	1.2			0.546				0.46	0.46	0.04	0.65	1.15	0.08	1.12	96.27	10.75	14.375	1.02679	14
ANTARKTIS XIV/3	perenial ice	N1401803	19970118	18	-72.52	-19.12	N1401803	also phaeopigments, d13C, bacterial abundance, and platelet ice available	no	0	2.2			1.15	52.2727			1.2	1.1	4.5		0.546				0.285	0.285	0.05	0.17	0.505	0.01	2.325	15.93	6.03	50.5	0.217204	232.5		2.17233	2.17233	0.381111	1.29578	3.84922	0.0762222	17.7217
ANTARKTIS XIV/3	perenial ice	N1401803	19970118	18	-72.52	-19.12	N1401803	also phaeopigments, d13C, bacterial abundance, and platelet ice available	no	0	2.2			1.05	47.7273			1.1	1	4.7		0.447	47.63			0.44	0.44	0.05	0.525	1.015	0.01	3.3	26.59	10.13	101.5	0.307576	330		3.21106	3.21106	0.364894	3.83138	7.40734	0.0729787	24.083
ANTARKTIS XIV/3	perenial ice	N1401803	19970118	18	-72.52	-19.12	N1401803	also phaeopigments, d13C, bacterial abundance, and platelet ice available	no	0	2.2			0.95	43.1818			1	0.9	5.1		1.176	156.13	18.95		1.265	1.265	0.07	2.96	4.295	0.01	4.065	172.03	18.49	429.5	1.05658	406.5		8.50775	8.50775	0.470784	19.9075	28.886	0.0672549	27.3391
ANTARKTIS XIV/3	perenial ice	N1401803	19970118	18	-72.52	-19.12	N1401803	also phaeopigments, d13C, bacterial abundance, and platelet ice available	no	0	2.2			0.85	38.6364			0.9	0.8	5.3		0.992	39.64	5.25		0.325	0.325	0.04	0.975	1.34	0.01	3.535	13.93	7.42	134	0.379066	353.5		2.1033	2.1033	0.258868	6.30991	8.67208	0.064717	22.8775
ANTARKTIS XIV/3	perenial ice	N1401803	19970118	18	-72.52	-19.12	N1401803	also phaeopigments, d13C, bacterial abundance, and platelet ice available	no	0	2.2			0.75	34.0909			0.8	0.7	4.9		0.645	738.89	105.69		0.49	0.49	0.04	0.675	1.205	0	1.265	12.3	5.66		0.952569			3.43	3.43	0.28	4.725	8.435	0	8.855
ANTARKTIS XIV/3	perenial ice	N1401803	19970118	18	-72.52	-19.12	N1401803	also phaeopigments, d13C, bacterial abundance, and platelet ice available	no	0	2.2			0.65	29.5455			0.7	0.6	4.6		0.769	63.87			0.525	0.525	0.055	0.63	1.21	0.01	0.665	28.66	6.36	121	1.81955	66.5		3.91467	3.91467	0.410109	4.69761	9.02239	0.0745652	4.95859
ANTARKTIS XIV/3	perenial ice	N1401803	19970118	18	-72.52	-19.12	N1401803	also phaeopigments, d13C, bacterial abundance, and platelet ice available	no	0	2.2			0.55	25			0.6	0.5	4.8		0.794				0.26	0.26	0.04	0.335	0.635	0.01	0.34	0	3.02	63.5	1.86765	34		1.85792	1.85792	0.285833	2.39385	4.5376	0.0714583	2.42958
ANTARKTIS XIV/3	perenial ice	N1401803	19970118	18	-72.52	-19.12	N1401803	also phaeopigments, d13C, bacterial abundance, and platelet ice available	no	0	2.2			0.45	20.4545			0.5	0.4	5.1		0.695	60.41	7.14		0.585	0.585	0.05	0.78	1.415	0.005	0.525	8.39	6.47	283	2.69524	105		3.93441	3.93441	0.336275	5.24588	9.51657	0.0336275	3.53088
ANTARKTIS XIV/3	perenial ice	N1401803	19970118	18	-72.52	-19.12	N1401803	also phaeopigments, d13C, bacterial abundance, and platelet ice available	no	0	2.2			0.35	15.9091			0.4	0.3	4.5		0.595	52	4.49		0.48	0.48	0.05	0.55	1.08	0.025	0.28	1.94	6.64	43.2	3.85714	11.2		3.65867	3.65867	0.381111	4.19222	8.232	0.190556	2.13422
ANTARKTIS XIV/3	perenial ice	N1401803	19970118	18	-72.52	-19.12	N1401803	also phaeopigments, d13C, bacterial abundance, and platelet ice available	no	0	2.2			0.25	11.3636			0.3	0.2	3		0.347	75.37	8.75		0.38	0.38	0.05	0.89	1.32	0.16	0.47	0.49	4.92	8.25	2.80851	2.9375		4.34467	4.34467	0.571667	10.1757	15.092	1.82933	5.37367
ANTARKTIS XIV/3	perenial ice	N1401803	19970118	18	-72.52	-19.12	N1401803	also phaeopigments, d13C, bacterial abundance, and platelet ice available	no	0	2.2			0.15	6.81818			0.2	0.1	1.6		1.8	98.96	10.06		0.08	0.08	0.03	0.4	0.51	0.11	0.315	0	3.39	4.63636	1.61905	2.86364		1.715	1.715	0.643125	8.575	10.9331	2.35812	6.75281
ANTARKTIS XIV/3	perenial ice	N1401803	19970118	18	-72.52	-19.12	N1401803	also phaeopigments, d13C, bacterial abundance, and platelet ice available	no	0	2.2			0.05	2.27273			0.1	0	1.4		1.098	128.83	10.27		0.615	0.615	0.04	1.265	1.92	0.01	0.47	0	7.15	192	4.08511	47		15.0675	15.0675	0.98	30.9925	47.04	0.245	11.515
ANTARKTIS XIV/3	perenial ice	N1402001	19970120	20	-74.12	-25.38	N1402001	also phaeopigments, d13C, bacterial abundance, and platelet ice available	no	1	0.97			0.05	5.15464			0.1	0	1.5		0.1	46.6	4.29		1.305	1.305	0.05	0.62	1.975	0.03	1.03	311.45	2.67	65.8333	1.91748	34.3333		29.841	29.841	1.14333	14.1773	45.1617	0.686	23.5527
ANTARKTIS XIV/3	perenial ice	N1402001	19970120	20	-74.12	-25.38	N1402001	also phaeopigments, d13C, bacterial abundance, and platelet ice available	no	0	0.97			0.15	15.4639			0.2	0.1	3.2		0.2	89.63	8.7		1.825	1.825	0.05	1.09	2.965	0.03	2.185	72.12	5.56	98.8333	1.35698	72.8333		19.5617	19.5617	0.535937	11.6834	31.7811	0.321562	23.4205
ANTARKTIS XIV/3	perenial ice	N1402001	19970120	20	-74.12	-25.38	N1402001	also phaeopigments, d13C, bacterial abundance, and platelet ice available	no	0	0.97			0.25	25.7732			0.3	0.2	3.7		0.94	68.62	7.55		1.485	1.485	0.05	0.91	2.445	0.065	2.21	63.69	6.84	37.6154	1.10633	34		13.7664	13.7664	0.463514	8.43595	22.6658	0.602568	20.4873
ANTARKTIS XIV/3	perenial ice	N1402001	19970120	20	-74.12	-25.38	N1402001	also phaeopigments, d13C, bacterial abundance, and platelet ice available	no	0	0.97			0.35	36.0825			0.4	0.3	3.5		0.27	85.44	8.17		0.955	0.955	0.06	1.015	2.03	0.05	2.2	55.71	5.58	40.6	0.922727	44		9.359	9.359	0.588	9.947	19.894	0.49	21.56
ANTARKTIS XIV/3	perenial ice	N1402001	19970120	20	-74.12	-25.38	N1402001	also phaeopigments, d13C, bacterial abundance, and platelet ice available	no	0	0.97			0.45	46.3918			0.5	0.4	3.5		0.45	123.72	8.87		0.755	0.755	0.055	0.975	1.785	0.115	1.66	50.51	5.11	15.5217	1.0753	14.4348		7.399	7.399	0.539	9.555	17.493	1.127	16.268
ANTARKTIS XIV/3	perenial ice	N1402001	19970120	20	-74.12	-25.38	N1402001	also phaeopigments, d13C, bacterial abundance, and platelet ice available	no	0	0.97			0.55	56.701			0.6	0.5	2.9		0.86	113.25	11.83		0.45	0.45	0.05	0.95	1.45	0.17	1.545	73.28	5.17	8.52941	0.938511	9.08824		5.32241	5.32241	0.591379	11.2362	17.15	2.01069	18.2736
ANTARKTIS XIV/3	perenial ice	N1402001	19970120	20	-74.12	-25.38	N1402001	also phaeopigments, d13C, bacterial abundance, and platelet ice available	no	0	0.97			0.65	67.0103			0.7	0.6	3.2		0.94	63.05	9.08		0.1	0.1	0.05	1.225	1.375	0.125	1.215	35.52	3.85	11	1.13169	9.72		1.07187	1.07187	0.535937	13.1305	14.7383	1.33984	13.0233
ANTARKTIS XIV/3	perenial ice	N1402001	19970120	20	-74.12	-25.38	N1402001	also phaeopigments, d13C, bacterial abundance, and platelet ice available	no	0	0.97			0.755	77.8351			0.81	0.7	3.6		1.02				0.6	0.6	0.07	0.65	1.32	0.105	2.6	68.12	4.64	12.5714	0.507692	24.7619		5.71667	5.71667	0.666944	6.19306	12.5767	1.00042	24.7722
ANTARKTIS XIV/3	perenial ice	N1402001	19970120	20	-74.12	-25.38	N1402001	also phaeopigments, d13C, bacterial abundance, and platelet ice available	no	0	0.97			0.855	88.1443			0.9	0.81	4.1		5.95	182.2	22.74		0.085	0.085	0.07	0.93	1.085	0.1	1.84	98.16	5.01	10.85	0.589674	18.4		0.711098	0.711098	0.58561	7.78024	9.07695	0.836585	15.3932
ANTARKTIS XIV/3	perenial ice	N1402001	19970120	20	-74.12	-25.38	N1402001	also phaeopigments, d13C, bacterial abundance, and platelet ice available	no	0	0.97			0.935	96.3918			0.97	0.9	4.6		18.82	392.63	44.73		0.265	0.265	0.08	2.05	2.395	0.3	3.995	225.3	13.14	7.98333	0.599499	13.3167		1.97598	1.97598	0.596522	15.2859	17.8584	2.23696	29.7888
ANTARKTIS XIV/3	perenial ice	N1402004	19970120	20	-74.12	-25.38	N1402004	also phaeopigments, d13C, bacterial abundance, and platelet ice available	no	1	0.4			0.05	12.5			0.1	0	3.3		0.2				0.305	0.305	0.05	0.625	0.98	0.04	3.29	22.64	4.07	24.5	0.297872	82.25		3.17015	3.17015	0.519697	6.49621	10.1861	0.415758	34.1961
ANTARKTIS XIV/3	perenial ice	N1402004	19970120	20	-74.12	-25.38	N1402004	also phaeopigments, d13C, bacterial abundance, and platelet ice available	no	0	0.4			0.155	38.75			0.21	0.1	3.6		0.2	82.92	8.56		0.6	0.6	0.04	1.04	1.68	0.175	3.51	30.82	3.68	9.6	0.478632	20.0571		5.71667	5.71667	0.381111	9.90889	16.0067	1.66736	33.4425
ANTARKTIS XIV/3	perenial ice	N1402004	19970120	20	-74.12	-25.38	N1402004	also phaeopigments, d13C, bacterial abundance, and platelet ice available	no	0	0.4			0.26	65			0.31	0.21	3.7		1.41	67.09	6.91		0.26	0.26	0.042	8.8	9.102	0.655	6.865	56.74	8.27	13.8962	1.32586	10.4809		2.41027	2.41027	0.389351	81.5784	84.378	6.07203	63.6404
ANTARKTIS XIV/3	perenial ice	N1402004	19970120	20	-74.12	-25.38	N1402004	also phaeopigments, d13C, bacterial abundance, and platelet ice available	no	0	0.4			0.355	88.75			0.4	0.31	2.5		1.41	98.02	14.21		0.27	0.27	0.042	9.88	10.192	0.61	2.085	51.83	8.85	16.7082	4.88825	3.41803		3.7044	3.7044	0.57624	135.554	139.834	8.3692	28.6062
ANTARKTIS XIV/3	perenial ice	N1402102	19970121	21	-73.09	-24.07	N1402102	also phaeopigments, d13C, bacterial abundance, and platelet ice available	no	1	0.59			0.05	8.47458			0.1	0	3.1		0.25	150.91	17.59		1.05	1.05	0.067	11.24	12.357	0.12	1.77	254.73	49.74	102.975	6.98136	14.75		11.6177	11.6177	0.741323	124.365	136.724	1.32774	19.5842
ANTARKTIS XIV/3	perenial ice	N1402102	19970121	21	-73.09	-24.07	N1402102	also phaeopigments, d13C, bacterial abundance, and platelet ice available	no	0	0.59			0.15	25.4237			0.2	0.1	5.1		0.2	55.78	8.43		0.83	0.83	0.04	4.96	5.83	0.045	1.875	98.74	16.61	129.556	3.10933	41.6667		5.58216	5.58216	0.26902	33.3584	39.2096	0.302647	12.6103
ANTARKTIS XIV/3	perenial ice	N1402102	19970121	21	-73.09	-24.07	N1402102	also phaeopigments, d13C, bacterial abundance, and platelet ice available	no	0	0.59			0.25	42.3729			0.3	0.2	5.1		0.94	94.44	12.56		0.69	0.69	0.04	4.615	5.345	0.055	0.595	74.11	10.42	97.1818	8.98319	10.8182		4.64059	4.64059	0.26902	31.0381	35.9477	0.369902	4.00167
ANTARKTIS XIV/3	perenial ice	N1402102	19970121	21	-73.09	-24.07	N1402102	also phaeopigments, d13C, bacterial abundance, and platelet ice available	no	0	0.59			0.35	59.322			0.4	0.3	4.4		4.96	116.5	13.24		0.705	0.705	0.04	2.93	3.675	0.07	0.585	58.88	8.61	52.5	6.28205	8.35714		5.4958	5.4958	0.311818	22.8407	28.6483	0.545682	4.56034
ANTARKTIS XIV/3	perenial ice	N1402102	19970121	21	-73.09	-24.07	N1402102	also phaeopigments, d13C, bacterial abundance, and platelet ice available	no	0	0.59			0.45	76.2712			0.5	0.4	3.5		6.45	123.64	14.06		0.86	0.86	0.035	4.115	5.01	0.05	0.66	57.38	12.61	100.2	7.59091	13.2		8.428	8.428	0.343	40.327	49.098	0.49	6.468
ANTARKTIS XIV/3	perenial ice	N1402102	19970121	21	-73.09	-24.07	N1402102	also phaeopigments, d13C, bacterial abundance, and platelet ice available	no	0	0.59			0.545	92.3729			0.59	0.5	3.2		2.48	187.81	16.7		0.665	0.665	0.06	4.395	5.12	0.095	0.725	55.76	11.86	53.8947	7.06207	7.63158		7.12797	7.12797	0.643125	47.1089	54.88	1.01828	7.77109
ANTARKTIS XIV/3	perenial ice	N1402403	19970124	24	-74.06	-33.16	N1402403	also phaeopigments, d13C, bacterial abundance, and platelet ice available	no	1	0.82			0.04	4.87805			0.08	0	2.6		0.05	41.92	6.89		0.13	0.13	0.035	1.995	2.16	0.01	2.22	46.41	9.92	216	0.972973	222		1.715	1.715	0.461731	26.3187	28.4954	0.131923	29.2869
ANTARKTIS XIV/3	perenial ice	N1402403	19970124	24	-74.06	-33.16	N1402403	also phaeopigments, d13C, bacterial abundance, and platelet ice available	no	0	0.82			0.13	15.8537			0.18	0.08	4.9		1.1	98.79	11.85		0.22	0.22	0.05	10.16	10.43	0.09	1.445	104.36	21.79	115.889	7.21799	16.0556		1.54	1.54	0.35	71.12	73.01	0.63	10.115
ANTARKTIS XIV/3	perenial ice	N1402403	19970124	24	-74.06	-33.16	N1402403	also phaeopigments, d13C, bacterial abundance, and platelet ice available	no	0	0.82			0.23	28.0488			0.28	0.18	4.6		1.29	103.28	14.6		0.265	0.265	0.05	10.98	11.295	0.03	1.495	143.24	37.75	376.5	7.55518	49.8333		1.97598	1.97598	0.372826	81.8726	84.2214	0.223696	11.1475
ANTARKTIS XIV/3	perenial ice	N1402403	19970124	24	-74.06	-33.16	N1402403	also phaeopigments, d13C, bacterial abundance, and platelet ice available	no	0	0.82			0.33	40.2439			0.38	0.28	4		3.14	113.69	19.19		0.41	0.41	0.05	8.655	9.115	0.055	1.43	88.62	16.77	165.727	6.37413	26		3.51575	3.51575	0.42875	74.2166	78.1611	0.471625	12.2622
ANTARKTIS XIV/3	perenial ice	N1402403	19970124	24	-74.06	-33.16	N1402403	also phaeopigments, d13C, bacterial abundance, and platelet ice available	no	0	0.82			0.43	52.439			0.48	0.38	3.8		2.98	83.7	13.85		0.495	0.495	0.05	11.84	12.385	0.045	2.08		12.62	275.222	5.95433	46.2222		4.46803	4.46803	0.451316	106.872	111.791	0.406184	18.7747
ANTARKTIS XIV/3	perenial ice	N1402403	19970124	24	-74.06	-33.16	N1402403	also phaeopigments, d13C, bacterial abundance, and platelet ice available	no	0	0.82			0.53	64.6341			0.58	0.48	4		1.72	94.38	15.58		0.55	0.55	0.04	11.55	12.14	0.02	2.29	70.49	13.84	607	5.30131	114.5		4.71625	4.71625	0.343	99.0412	104.1	0.1715	19.6367
ANTARKTIS XIV/3	perenial ice	N1402403	19970124	24	-74.06	-33.16	N1402403	also phaeopigments, d13C, bacterial abundance, and platelet ice available	no	0	0.82			0.62	75.6098			0.66	0.58	3.7		1.88	110.88	21.51		1.3	1.3	0.04	14.61	15.95	0.01	2.1	74.39	16.52	1595	7.59524	210		12.0514	12.0514	0.370811	135.439	147.861	0.0927027	19.4676
ANTARKTIS XIV/3	perenial ice	N1402403	19970124	24	-74.06	-33.16	N1402403	also phaeopigments, d13C, bacterial abundance, and platelet ice available	no	0	0.82			0.71	86.5854			0.76	0.66	3.1		2.43	99.68	17.06		0.465	0.465	0.05	3.975	4.49	0.01	1.605	58.79	13.62	449	2.79751	160.5		5.145	5.145	0.553226	43.9815	49.6797	0.110645	17.7585
ANTARKTIS XIV/3	perenial ice	N1402403	19970124	24	-74.06	-33.16	N1402403	also phaeopigments, d13C, bacterial abundance, and platelet ice available	no	0	0.82			0.79	96.3415			0.82	0.76	3.4		2.82	106.78	18.34		0.835	0.835	0.04	7.67	8.545	0	1.59	48.82	11.6		5.37421			8.42368	8.42368	0.403529	77.3768	86.204	0	16.0403
ANTARKTIS XIV/3	perenial ice	N1404602	19970215	45	-67.54	-45.15	N1404602	also phaeopigments, d13C, bacterial abundance, and platelet ice available	no	1	1.13			0.035	3.09735			0.07	0	0.4		3.97	195.13	17.7		0.345	0.345	0.06	2.225	2.63	0.29	0.64	161.21	23.92	9.06897	0.243346	2.2069		29.5837	29.5837	5.145	190.794	225.522	24.8675	54.88
ANTARKTIS XIV/3	perenial ice	N1404602	19970215	45	-67.54	-45.15	N1404602	also phaeopigments, d13C, bacterial abundance, and platelet ice available	no	0	1.13			0.105	9.29204			0.14	0.07	8.7		36.06	138.31	14.15		1.48	1.48	0.13	3.875	5.485	1.125	5.265	376.13	58.5	4.87556	0.959891	4.68		5.83494	5.83494	0.512529	15.2773	21.6248	4.43534	20.7574
ANTARKTIS XIV/3	perenial ice	N1404602	19970215	45	-67.54	-45.15	N1404602	also phaeopigments, d13C, bacterial abundance, and platelet ice available	no	0	1.13			0.17	15.0442			0.2	0.14	6.3		17.86	330.27	34.6		2.15	2.15	0.08	1.935	4.165	1.545	6.01	190.17	30.83	2.69579	1.44298	3.88997		11.7056	11.7056	0.435556	10.535	22.6761	8.41167	32.7211
ANTARKTIS XIV/3	perenial ice	N1404602	19970215	45	-67.54	-45.15	N1404602	also phaeopigments, d13C, bacterial abundance, and platelet ice available	no	0	1.13			0.25	22.1239			0.3	0.2	6.2		28.22	202	29.69		2.39	2.39	0.07	1.445	3.905	1.73	5.3	226.3	28.42	2.25723	1.35723	3.06358		13.2221	13.2221	0.387258	7.99411	21.6035	9.57081	29.321
ANTARKTIS XIV/3	perenial ice	N1404602	19970215	45	-67.54	-45.15	N1404602	also phaeopigments, d13C, bacterial abundance, and platelet ice available	no	0	1.13			0.35	30.9735			0.4	0.3	2.3		3.29	107.12	14.07		0.34	0.34	0.05	0.59	0.98	0.45	1.78	97.34	11.76	2.17778	1.81633	3.95556		5.07043	5.07043	0.745652	8.7987	14.6148	6.71087	26.5452
ANTARKTIS XIV/3	perenial ice	N1404602	19970215	45	-67.54	-45.15	N1404602	also phaeopigments, d13C, bacterial abundance, and platelet ice available	no	0	1.13			0.45	39.823			0.5	0.4	3		1.8	66.3	4.89		0.31	0.31	0.03	0.945	1.285	0.215	1.675	74.3	11.5	5.97674	1.3035	7.7907		3.54433	3.54433	0.343	10.8045	14.6918	2.45817	19.1508
ANTARKTIS XIV/3	perenial ice	N1404602	19970215	45	-67.54	-45.15	N1404602	also phaeopigments, d13C, bacterial abundance, and platelet ice available	no	0	1.13			0.55	48.6726			0.6	0.5	4.9		3.72	86.58	8.6		1.08	1.08	0.05	1.33	2.46	0.37	4.885	60.19	11.13	6.64865	1.98577	13.2027		7.56	7.56	0.35	9.31	17.22	2.59	34.195
ANTARKTIS XIV/3	perenial ice	N1404602	19970215	45	-67.54	-45.15	N1404602	also phaeopigments, d13C, bacterial abundance, and platelet ice available	no	0	1.13			0.655	57.9646			0.71	0.6	5.3		4.71	132.03	13.62		1.695	1.695	0.06	2.46	4.215	0.55	7.005	71.91	13.09	7.66364	1.66192	12.7364		10.9695	10.9695	0.388302	15.9204	27.2782	3.55943	45.3342
ANTARKTIS XIV/3	perenial ice	N1404602	19970215	45	-67.54	-45.15	N1404602	also phaeopigments, d13C, bacterial abundance, and platelet ice available	no	0	1.13			0.77	68.1416			0.83	0.71	6.8		12.54	168.85	17.15		2.86	2.86	0.07	1.27	4.2	0.965	10.405	217.31	14.37	4.35233	2.47738	10.7824		14.4262	14.4262	0.353088	6.40603	21.1853	4.86757	52.484
ANTARKTIS XIV/3	perenial ice	N1404602	19970215	45	-67.54	-45.15	N1404602	also phaeopigments, d13C, bacterial abundance, and platelet ice available	no	0	1.13			0.88	77.8761			0.93	0.83	3		11.91	214.61	15.73		0.6	0.6	0.06	0.605	1.265	0.72	5.71	362.45	11.24	1.75694	4.51383	7.93056		6.86	6.86	0.686	6.91717	14.4632	8.232	65.2843
ANTARKTIS XIV/3	perenial ice	N1404602	19970215	45	-67.54	-45.15	N1404602	also phaeopigments, d13C, bacterial abundance, and platelet ice available	no	0	1.13			0.98	86.7257			1.03	0.93	3		21.95	207.39	17.25		0.115	0.115	0.06	0.595	0.77	1.04	5.695	429.64	13.98	0.740385	7.3961	5.47596		1.31483	1.31483	0.686	6.80283	8.80367	11.8907	65.1128
ANTARKTIS XIV/3	perenial ice	N1404602	19970215	45	-67.54	-45.15	N1404602	also phaeopigments, d13C, bacterial abundance, and platelet ice available	no	0	1.13			1.08	95.5752			1.13	1.03	4.1		21.95				0.78	0.78	0.05	2.265	3.095	0.785	6.88	272.12	19.34	3.94268	2.22294	8.76433		6.52537	6.52537	0.418293	18.9487	25.8923	6.5672	57.5571
ANTARKTIS XIV/3	perenial ice	N1404712	19970216	46	-67.48	-50.04	N1404712	also phaeopigments, d13C, bacterial abundance, and platelet ice available	no	1	1.7			0.05	2.94118			0.1	0			0.22	32.53	3.95		0.24	0.24	0.04	0.92	1.2	0.13	2.35		15.05	9.23077	1.95833	18.0769
ANTARKTIS XIV/3	perenial ice	N1404712	19970216	46	-67.48	-50.04	N1404712	also phaeopigments, d13C, bacterial abundance, and platelet ice available	no	0	1.7			0.135	7.94118			0.17	0.1	4.3		8.68	201.75	24.34		0.155	0.155	0.04	2.51	2.705	0.435	4.29	134.88	11.28	6.21839	1.58595	9.86207		1.2364	1.2364	0.31907	20.0216	21.5771	3.46988	34.2202
ANTARKTIS XIV/3	perenial ice	N1404712	19970216	46	-67.48	-50.04	N1404712	also phaeopigments, d13C, bacterial abundance, and platelet ice available	no	0	1.7			0.215	12.6471			0.26	0.17	5.6		13.36	221.18	26.78		1.365	1.365	0.07	2.88	4.315	1.285	5.56	95.18	25.99	3.35798	1.28853	4.32685		8.36063	8.36063	0.42875	17.64	26.4294	7.87062	34.055
ANTARKTIS XIV/3	perenial ice	N1404712	19970216	46	-67.48	-50.04	N1404712	also phaeopigments, d13C, bacterial abundance, and platelet ice available	no	0	1.7			0.41	24.1176			0.46	0.36	4.8		8.93	184.53	24.38		1.285	1.285	0.06	2.69	4.035	1.32	5.56		24.83	3.05682	1.37794	4.21212		9.1824	9.1824	0.42875	19.2223	28.8334	9.4325	39.7308
ANTARKTIS XIV/3	perenial ice	N1404712	19970216	46	-67.48	-50.04	N1404712	also phaeopigments, d13C, bacterial abundance, and platelet ice available	no	0	1.7			0.51	30			0.56	0.46	4.3		6.95	134.02	18.03		1.035	1.035	0.09	1.85	2.975	3.22	3.85		25.23	0.923913	1.29412	1.19565		8.25593	8.25593	0.717907	14.757	23.7308	25.6851	30.7105
ANTARKTIS XIV/3	perenial ice	N1404712	19970216	46	-67.48	-50.04	N1404712	also phaeopigments, d13C, bacterial abundance, and platelet ice available	no	0	1.7			0.61	35.8824			0.66	0.56	4.5		8.93	108.27	16.07		0.94	0.94	0.05	1.45	2.44	0.735	2.85	123.97	14.2	3.31973	1.16803	3.87755		7.16489	7.16489	0.381111	11.0522	18.5982	5.60233	21.7233
ANTARKTIS XIV/3	perenial ice	N1404712	19970216	46	-67.48	-50.04	N1404712	also phaeopigments, d13C, bacterial abundance, and platelet ice available	no	0	1.7			0.71	41.7647			0.76	0.66	3.7		8.27	86.76	12.4		0.78	0.78	0.05	1.18	2.01	0.86	3.24		17.57	2.33721	1.61194	3.76744		7.23081	7.23081	0.463514	10.9389	18.6332	7.97243	30.0357
ANTARKTIS XIV/3	perenial ice	N1404712	19970216	46	-67.48	-50.04	N1404712	also phaeopigments, d13C, bacterial abundance, and platelet ice available	no	0	1.7			0.79	46.4706			0.82	0.76	3.8		4.71	47.42	5.72		0.675	0.675	0.065	0.86	1.6	0.675	3.32		20.37	2.37037	2.075	4.91852		6.09276	6.09276	0.586711	7.76263	14.4421	6.09276	29.9674
ANTARKTIS XIV/3	perenial ice	N1404712	19970216	46	-67.48	-50.04	N1404712	also phaeopigments, d13C, bacterial abundance, and platelet ice available	no	0	1.7			0.87	51.1765			0.92	0.82	3.9		13.59	74.53	10.46		0.935	0.935	0.05	0.51	1.495	0.985	3.84	50.24	10.67	1.51777	2.56856	3.89848		8.22321	8.22321	0.439744	4.48538	13.1483	8.66295	33.7723
ANTARKTIS XIV/3	perenial ice	N1404712	19970216	46	-67.48	-50.04	N1404712	also phaeopigments, d13C, bacterial abundance, and platelet ice available	no	0	1.7			0.97	57.0588			1.02	0.92	3.8		15.68	87.72	12.24		0.72	0.72	0.06	0.54	1.32	1.17	3.15		10.47	1.12821	2.38636	2.69231		6.49895	6.49895	0.541579	4.87421	11.9147	10.5608	28.4329
ANTARKTIS XIV/3	perenial ice	N1404712	19970216	46	-67.48	-50.04	N1404712	also phaeopigments, d13C, bacterial abundance, and platelet ice available	no	0	1.7			1.07	62.9412			1.12	1.02	2.5		12.54	79.68	11.57		0.735	0.735	0.05	0.83	1.615	0.8	2.67	53.62	15.68	2.01875	1.65325	3.3375		10.0842	10.0842	0.686	11.3876	22.1578	10.976	36.6324
ANTARKTIS XIV/3	perenial ice	N1404712	19970216	46	-67.48	-50.04	N1404712	also phaeopigments, d13C, bacterial abundance, and platelet ice available	no	0	1.7			1.17	68.8235			1.22	1.12	3.6		7.69	40.16	5.79		0.74	0.74	0.05	0.36	1.15	0.325	2.48	118.95	11.35	3.53846	2.15652	7.63077		7.05056	7.05056	0.476389	3.43	10.9569	3.09653	23.6289
ANTARKTIS XIV/3	perenial ice	N1404712	19970216	46	-67.48	-50.04	N1404712	also phaeopigments, d13C, bacterial abundance, and platelet ice available	no	0	1.7			1.27	74.7059			1.32	1.22	3.9		8.19	65.28	7.16		0.78	0.78	0.04	0.29	1.11	0.38	2.59	132.62	13.2	2.92105	2.33333	6.81579		6.86	6.86	0.351795	2.55051	9.76231	3.34205	22.7787
ANTARKTIS XIV/3	perenial ice	N1404712	19970216	46	-67.48	-50.04	N1404712	also phaeopigments, d13C, bacterial abundance, and platelet ice available	no	0	1.7			1.37	80.5882			1.42	1.32	4.3		10.67	75.99	8.84		0.76	0.76	0.05	0.18	0.99	0.3	2.525	111.29	9.59	3.3	2.55051	8.41667		6.06233	6.06233	0.398837	1.43581	7.89698	2.39302	20.1413
ANTARKTIS XIV/3	perenial ice	N1404712	19970216	46	-67.48	-50.04	N1404712	also phaeopigments, d13C, bacterial abundance, and platelet ice available	no	0	1.7			1.47	86.4706			1.52	1.42	4.2		32.14	192.18	18.67		2.425	2.425	0.06	1.12	3.605	1.84	4.38	381.59	19.99	1.95924	1.21498	2.38043		19.8042	19.8042	0.49	9.14667	29.4408	15.0267	35.77
ANTARKTIS XIV/3	perenial ice	N1404712	19970216	46	-67.48	-50.04	N1404712	also phaeopigments, d13C, bacterial abundance, and platelet ice available	no	0	1.7			1.57	92.3529			1.62	1.52	4.1		18.82	97.3	10.9		1.625	1.625	0.04	0.73	2.395	0.835	3.96	96.98	17.65	2.86826	1.65344	4.74251		13.5945	13.5945	0.334634	6.10707	20.0362	6.98549	33.1288
ANTARKTIS XIV/3	perenial ice	N1404712	19970216	46	-67.48	-50.04	N1404712	also phaeopigments, d13C, bacterial abundance, and platelet ice available	no	0	1.7			1.66	97.6471			1.7	1.62	3.5		11.34	55.18			1.185	1.185	0.055	0.88	2.12	0.365	3.98	176.31	19.52	5.80822	1.87736	10.9041		11.613	11.613	0.539	8.624	20.776	3.577	39.004
ANTARKTIS XIV/3	Young-Ice	N 14 047 01	19970216	47	-68.01	-50.02	N 14 047 01	also phaeopigments, d13C, bacterial abundance, and platelet ice available	no	1	0.18			0.065	36.1111			0.13	0	1.6		0.19	71.18	7.48		0.61	0.61	0.08	1.67	2.36	0.15	1.47	98.93	11.36	15.7333	1.60544	9.8		13.0769	13.0769	1.715	35.8006	50.5925	3.21562	31.5131
ANTARKTIS XIV/3	Young-Ice	N 14 047 01	19970216	47	-68.01	-50.02	N 14 047 01	also phaeopigments, d13C, bacterial abundance, and platelet ice available	no	0	0.18			0.125	69.4444			0.18	0.07	9.8		5.02	343.28	35.94		2.15	2.15	0.14	7.2	9.49	0.39	8.21		28.86	24.3333	1.15591	21.0513		7.525	7.525	0.49	25.2	33.215	1.365	28.735
ANTARKTIS XIV/3	Young-Ice	N 14 047 01	19970216	47	-68.01	-50.02	N 14 047 01	also phaeopigments, d13C, bacterial abundance, and platelet ice available	no	0								10 cm after gap		6		10.42	242.95	30.24		2.61	2.61	0.08	2.3	4.99	0.96	7.34	191.03	31.44	5.19792	0.679837	7.64583		14.9205	14.9205	0.457333	13.1483	28.5262	5.488	41.9603
ANTARKTIS XIV/3	Young-Ice	N1405301 0.5 m	19970222	53	-68.38	-44.41	N1405301 0.5 m	also phaeopigments, d13C, bacterial abundance, and platelet ice available	no	1	0.16			0.05	31.25			0.1	0	6.1		9.18	91.53	16.4		1.44	1.44	0.08	0.98	2.5	2.475	8.82	53.64	11.39	1.0101	0.283447	3.56364		8.09705	8.09705	0.449836	5.51049	14.0574	13.9168	49.5944
ANTARKTIS XIV/3	Young-Ice	N1405301 0.5 m	19970222	53	-68.38	-44.41	N1405301 0.5 m	also phaeopigments, d13C, bacterial abundance, and platelet ice available	no	0	0.16			0.13	81.25			0.16	0.1	8.5		23.52	484.49	60.44		3.34	3.34	0.09	2.38	5.81	1.21	10.59	152.48	22.49	4.80165	0.548631	8.75207		13.4779	13.4779	0.363176	9.604	23.4451	4.88271	42.7338
ANTARKTIS XIV/3	Young-Ice	N1405301 2.5 m	19970222	53	-68.38	-44.41	N1405301 2.5 m	also phaeopigments, d13C, bacterial abundance, and platelet ice available	no	1	0.17			0.055	32.3529			0.11	0	4.4		6.05	72.72	13.06		0.73	0.73	0.07	2.27	3.07	0.485	4.88	32.55	9.28	6.3299	0.629098	10.0619		5.69068	5.69068	0.545682	17.6957	23.932	3.7808	38.0418
ANTARKTIS XIV/3	Young-Ice	N1405301 2.5 m	19970222	53	-68.38	-44.41	N1405301 2.5 m	also phaeopigments, d13C, bacterial abundance, and platelet ice available	no	0	0.17			0.14	82.3529			0.17	0.11	10.1		38.08	504.84	70.24		0.73	0.73	0.09	3.43	4.25	1.415	6.58	96.48	20.1	3.00353	0.645897	4.65018		2.47911	2.47911	0.305644	11.6484	14.4332	4.8054	22.3459
ANTARKTIS XIV/3	Young-Ice	N1405301 4 m	19970222	53	-68.38	-44.41	N1405301 4 m	also phaeopigments, d13C, bacterial abundance, and platelet ice available	no	1	0.15			0.05	33.3333			0.1	0	3.3		4.14	101.28	18.12		0.24	0.24	0.04	1.21	1.49	0.26	3.24	110.71	20.61	5.73077	0.459877	12.4615		2.49455	2.49455	0.415758	12.5767	15.487	2.70242	33.6764
ANTARKTIS XIV/3	perenial ice	N1405301 4 m	19970222	53	-68.38	-44.41	N1405301 4 m	also phaeopigments, d13C, bacterial abundance, and platelet ice available	no	0	0.15			0.125	83.3333			0.15	0.1	11.2		43.9	501.34	78.91		3.555	3.555	0.11	4.38	8.045	1.09	12.13	130	29.3	7.38073	0.663232	11.1284		10.8872	10.8872	0.336875	13.4137	24.6378	3.33813	37.1481
ANTARKTIS XIV/3	perenial ice	N1405301 6 m	19970222	52	-68.38	-44.41	N1405301 6 m	also phaeopigments, d13C, bacterial abundance, and platelet ice available	no	1	0.36			0.045	12.5			0.09	0	5.6		4.3	126.45	20.04		0.25	0.25	0.045	1.62	1.915	0.48	2.88		11.69	3.98958	1.50392	6		1.53125	1.53125	0.275625	9.9225	11.7294	2.94	17.64
ANTARKTIS XIV/3	perenial ice	N1405301 6 m	19970222	52	-68.38	-44.41	N1405301 6 m	also phaeopigments, d13C, bacterial abundance, and platelet ice available	no	0	0.36			0.125	34.7222			0.16	0.09	9.8			448.48	68.08		2.53	2.53	0.087	9.44	12.057	1.16	9.95	106.48	20.78	10.394	0.825247	8.57759		8.855	8.855	0.3045	33.04	42.1995	4.06	34.825
ANTARKTIS XIV/3	perenial ice	N1405301 6 m	19970222	52	-68.38	-44.41	N1405301 6 m	also phaeopigments, d13C, bacterial abundance, and platelet ice available	no	0	0.36			0.21	58.3333			0.26	0.16	3.8		39.2	373.88	52.19		2.56	2.56	0.075	3.59	6.225	3.36	8.52		37.72	1.85268	1.36867	2.53571		23.1074	23.1074	0.676974	32.4045	56.1888	30.3284	76.9042
ANTARKTIS XIV/3	perenial ice	N1405301 6 m	19970222	52	-68.38	-44.41	N1405301 6 m	also phaeopigments, d13C, bacterial abundance, and platelet ice available	no	0	0.36			0.31	86.1111			0.36	0.26	5.8		28.22	287.81	37.58		3.63	3.63	0.08	3.4	7.11	2.235	9.64	131.05	27.86	3.18121	1.35584	4.3132		21.4671	21.4671	0.473103	20.1069	42.0471	13.2173	57.009
ANTARKTIS XIV/3	perenial ice	N1405402	19970223	54	-68.45	-44.36	N1405402	also phaeopigments, d13C, bacterial abundance, and platelet ice available	no	1	0.8			0.045	5.625			0.09	0	1.2		0.67	100.58	9.8		0.64	0.64	0.04	0.875	1.555	0.175	1.87	61.56	11.47	8.88571	0.831551	10.6857		18.2933	18.2933	1.14333	25.0104	44.4471	5.00208	53.4508
ANTARKTIS XIV/3	perenial ice	N1405402	19970223	54	-68.45	-44.36	N1405402	also phaeopigments, d13C, bacterial abundance, and platelet ice available	no	0	0.8			0.14	17.5			0.19	0.09	9.5		29.79	786.31	42.49		0.285	0.285	0.05	0.68	1.015	0.315	14.28	116.2	13.91	3.22222	0.0710784	45.3333		1.029	1.029	0.180526	2.45516	3.66468	1.13732	51.5583
ANTARKTIS XIV/3	perenial ice	N1405402	19970223	54	-68.45	-44.36	N1405402	also phaeopigments, d13C, bacterial abundance, and platelet ice available	no	0	0.8			0.235	29.375			0.28	0.19	7.5		56.45	847.15	63.24		2.695	2.695	0.075	1.905	4.675	1.655	11.715	352.96	1.82	2.82477	0.399061	7.07855		12.3251	12.3251	0.343	8.7122	21.3803	7.56887	53.5766
ANTARKTIS XIV/3	perenial ice	N1405402	19970223	54	-68.45	-44.36	N1405402	also phaeopigments, d13C, bacterial abundance, and platelet ice available	no	0	0.8			0.33	41.25			0.38	0.28	6.6		65.86	712.05	65.47		3.115	3.115	0.08	1.53	4.725	2.14	9.025	323.06	1.5	2.20794	0.523546	4.21729		16.1886	16.1886	0.415758	7.95136	24.5557	11.1215	46.9027
ANTARKTIS XIV/3	perenial ice	N1405402	19970223	54	-68.45	-44.36	N1405402	also phaeopigments, d13C, bacterial abundance, and platelet ice available	no	0	0.8			0.43	53.75			0.48	0.38	6.3		12.41	744.76	79.04		3.94	3.94	0.11	2.125	6.175	6.16	9.282	378.31	45.52	1.00244	0.665266	1.50682		21.4511	21.4511	0.598889	11.5694	33.6194	33.5378	50.5353
ANTARKTIS XIV/3	perenial ice	N1405402	19970223	54	-68.45	-44.36	N1405402	also phaeopigments, d13C, bacterial abundance, and platelet ice available	no	0	0.8			0.53	66.25			0.58	0.48	4.7		31.36	210.03	26.04		1.645	1.645	0.075	1.545	3.265	1.21	5.03	148.75	16.54	2.69835	0.649105	4.15702		12.005	12.005	0.54734	11.2752	23.8276	8.83043	36.7083
ANTARKTIS XIV/3	perenial ice	N1405402	19970223	54	-68.45	-44.36	N1405402	also phaeopigments, d13C, bacterial abundance, and platelet ice available	no	0	0.8			0.63	78.75			0.68	0.58	3.5		14.9	148.78	14.54		0.5	0.5	0.025	1.295	1.82	0.53	3.725		15.02	3.43396	0.488591	7.0283		4.9	4.9	0.245	12.691	17.836	5.194	36.505
ANTARKTIS XIV/3	perenial ice	N1405402	19970223	54	-68.45	-44.36	N1405402	also phaeopigments, d13C, bacterial abundance, and platelet ice available	no	0	0.8			0.74	92.5			0.8	0.68				93.49	11.67		1.17	1.17	0.055	1.35	2.575	0.64	4.825	99.61	20.02	4.02344	0.533679	7.53906
ANTARKTIS XIV/3	Young-Ice	N1405501 0m	19970224	55	-69.43	-40.34	N1405501 0m	also phaeopigments, d13C, bacterial abundance, and platelet ice available	no	1	0.13			0.065	50			0.13	0	7.1		90.31	407.91	58.37		5.75	5.75	0.09	4.425	10.265	3.935	13.595	202.83	13	2.60864	0.755057	3.45489		27.7782	27.7782	0.434789	21.3771	49.5901	19.0099	65.6773
ANTARKTIS XIV/3	Young-Ice	N1405501 1m	19970224	55	-69.43	-40.34	N1405501 1m	also phaeopigments, d13C, bacterial abundance, and platelet ice available	no	1	0.15			0.05	33.3333			0.1	0	1		5.46	204.45	24.85		0.66	0.66	0.04	2	2.7	3.425	1.87	201.66	37.34	0.788321	1.44385	0.545985		22.638	22.638	1.372	68.6	92.61	117.477	64.141
ANTARKTIS XIV/3	Young-Ice	N1405501 1m	19970224	55	-69.43	-40.34	N1405501 1m	also phaeopigments, d13C, bacterial abundance, and platelet ice available	no	0	0.15			0.125	83.3333			0.15	0.1	5.7		47.04	292.47	45.6		2.795	2.795	0.07	3.775	6.64	2.21	9.195	144.72	23.46	3.00452	0.722132	4.16063		16.819	16.819	0.421228	22.7162	39.9565	13.2988	55.3313
ANTARKTIS XIV/3	Young-Ice	N1405501 2m	19970224	55	-69.43	-40.34	N1405501 2m	also phaeopigments, d13C, bacterial abundance, and platelet ice available	no	1	0.13			0.035	26.9231			0.07	0	8.7		47.04	305.94	45.16		6.76	6.76	0.075	8.4	15.235	1.98	15.955	75.94	18.83	7.69444	0.954873	8.05808		26.6515	26.6515	0.29569	33.1172	60.0644	7.80621	62.903
ANTARKTIS XIV/3	Young-Ice	N1405501 2m	19970224	55	-69.43	-40.34	N1405501 2m	also phaeopigments, d13C, bacterial abundance, and platelet ice available	no	0	0.13			0.1	76.9231			0.13	0.07	10.1		41.44	281.93	45.86		8.12	8.12	0.077	9.38	17.577	2.8	20.43	70.08	16.45	6.2775	0.860352	7.29643		27.5758	27.5758	0.261495	31.8549	59.6922	9.50891	69.3811
ANTARKTIS XIV/3	Young-Ice	N1405501 3m	19970224	55	-69.43	-40.34	N1405501 3m	also phaeopigments, d13C, bacterial abundance, and platelet ice available	no	1	0.18			0.05	27.7778			0.1	0	7.1		178.36	1082.19	137.29		1.16	1.16	0.072	10.08	11.312	3.16	1.085	204.03	25.69	3.57975	10.4258	0.343354		5.60394	5.60394	0.347831	48.6963	54.6481	15.2659	5.24162
ANTARKTIS XIV/3	Young-Ice	N1405501 3m	19970224	55	-69.43	-40.34	N1405501 3m	also phaeopigments, d13C, bacterial abundance, and platelet ice available	no	0	0.18			0.14	77.7778			0.18	0.1	9.5		246.96	1077.57	128.5		7.565	7.565	0.08	6.67	14.315	9.08	8.112	1378.77	30.4	1.57654	1.76467	0.893392		27.3136	27.3136	0.288842	24.0822	51.6847	32.7836	29.2886
ANTARKTIS XIV/3	perenial ice	N1405602	19970225	55	-71.32	-38.43	N1405602	also phaeopigments, d13C, bacterial abundance, and platelet ice available	no	1	0.47			0.025	5.31915			0.05	0	0.8		0.63				0.19	0.19	0.05	0.65	0.89	0.17	0.475	106.86	5.87	5.23529	0.533708	2.79412		8.14625	8.14625	2.14375	27.8687	38.1587	7.28875	20.3656
ANTARKTIS XIV/3	perenial ice	N1405602	19970225	55	-71.32	-38.43	N1405602	also phaeopigments, d13C, bacterial abundance, and platelet ice available	no	0	0.47			0.1	21.2766			0.15	0.05	4.1		5.21	125.98	14.83		0.36	0.36	0.06	1.655	2.075	0.37	2.315	198.58	15.81	5.60811	1.11566	6.25676		3.01171	3.01171	0.501951	13.8455	17.3591	3.09537	19.367
ANTARKTIS XIV/3	perenial ice	N1405602	19970225	55	-71.32	-38.43	N1405602	also phaeopigments, d13C, bacterial abundance, and platelet ice available	no	0	0.47			0.175	37.234			0.2	0.15	6.1		14.89	247.76	28.41		0.565	0.565	0.11	5.9	6.575	1.6	4.265	311.88	62.33	4.10938	0.648669	2.66562		3.17697	3.17697	0.618525	33.1754	36.9709	8.99672	23.9819
ANTARKTIS XIV/3	perenial ice	N1405602	19970225	55	-71.32	-38.43	N1405602	also phaeopigments, d13C, bacterial abundance, and platelet ice available	no	0	0.47			0.21	44.6809			0.22	0.2	10.4		73.17	692.96	103.4		4.84	4.84	0.107	17.28	22.227	1.06	13.225	416.31	19.12	20.9689	0.594997	12.4764		15.9627	15.9627	0.352894	56.9908	73.3064	3.49596	43.6171
ANTARKTIS XIV/3	perenial ice	N1405602	19970225	55	-71.32	-38.43	N1405602	also phaeopigments, d13C, bacterial abundance, and platelet ice available	no	0	0.47			0.27	57.4468			0.32	0.22	4.1		43.9	326.32	44.83		2.125	2.125	0.17	6.57	8.865	4.22	3.835	652.24	38.79	2.10071	0.4326	0.908768		17.7774	17.7774	1.4222	54.9637	74.1633	35.3039	32.083
ANTARKTIS XIV/3	perenial ice	N1405602	19970225	55	-71.32	-38.43	N1405602	also phaeopigments, d13C, bacterial abundance, and platelet ice available	no	0	0.47			0.37	78.7234			0.42	0.32	5.1		45.47	489.65	64.19		2.275	2.275	0.16	4.03	6.465	4.14	5.035	433.52	26.04	1.56159	0.778809	1.21618		15.3005	15.3005	1.07608	27.1037	43.4803	27.8435	33.8628
ANTARKTIS XIV/3	perenial ice	N1405602	19970225	55	-71.32	-38.43	N1405602	also phaeopigments, d13C, bacterial abundance, and platelet ice available	no	0	0.47			0.445	94.6809			0.47	0.42	6.4		44.43	450.13	54.75		2.69	2.69	0.11	5.39	8.19	2.635	7.705	369.34		3.10816	0.940781	2.9241		14.4167	14.4167	0.589531	28.887	43.8933	14.122	41.294
ANTARKTIS XIV/3	Young-Ice	N1405702 5m	19970226	56	-72.31	-36.29	N1405702 5m	also phaeopigments, d13C, bacterial abundance, and platelet ice available	no	1	0.21			0.015	7.14286			0.03	0	8.1		4.466	141.94	19.24		0.98	0.98	0.05	0.81	1.84	0.12	9.465			15.3333	5.14402	78.875		4.14988	4.14988	0.211728	3.43	7.7916	0.508148	40.0802
ANTARKTIS XIV/3	Young-Ice	N1405702 5m	19970226	56	-72.31	-36.29	N1405702 5m	also phaeopigments, d13C, bacterial abundance, and platelet ice available	no	0	0.21			0.08	38.0952			0.13	0.03	7.6		21.952	399.25	48.29		0	0	0.04	2.81	2.85	0.44	6.535			6.47727	2.29298	14.8523		0	0	0.180526	12.682	12.8625	1.98579	29.4935
ANTARKTIS XIV/3	Young-Ice	N1405702 5m	19970226	56	-72.31	-36.29	N1405702 5m	also phaeopigments, d13C, bacterial abundance, and platelet ice available	no	0	0.21			0.17	80.9524			0.21	0.13	10.2		305.76	2593.71	423.59		0.39	0.39	0.105	28.4	28.895	4.185	34.86			6.90442	1.20644	8.32975		1.31147	1.31147	0.353088	95.502	97.1665	14.0731	117.225
ANTARKTIS XIV/3	perenial ice	N1405702 1m	19970226	57	-72.31	-36.29	N1405702 1m	also phaeopigments, d13C, bacterial abundance, and platelet ice available	no	1	0.4			0.025	6.25			0.05	0	8.4		5.954	235.54	27.08		0.575	0.575	0.045	1.54	2.16	0.15	6.115	129.84	11.18	14.4	0.35323	40.7667		2.34792	2.34792	0.18375	6.28833	8.82	0.6125	24.9696
ANTARKTIS XIV/3	perenial ice	N1405702 1m	19970226	57	-72.31	-36.29	N1405702 1m	also phaeopigments, d13C, bacterial abundance, and platelet ice available	no	0	0.4			0.075	18.75			0.1	0.05	6.8		9.924	223.73	27.36		0.195	0.195	0.04	2	2.235	0.175	4.075	112.24	6.38	12.7714	0.548466	23.2857		0.983603	0.983603	0.201765	10.0882	11.2736	0.882721	20.5548
ANTARKTIS XIV/3	perenial ice	N1405702 1m	19970226	57	-72.31	-36.29	N1405702 1m	also phaeopigments, d13C, bacterial abundance, and platelet ice available	no	0	0.4			0.15	37.5			0.2	0.1	8.9		156.8	1392.47	202.96		0.785	0.785	0.12	11.16	12.065	3.75	16.66	386.32	35.91	3.21733	0.72419	4.44267		3.02534	3.02534	0.462472	43.0099	46.4977	14.4522	64.2065
ANTARKTIS XIV/3	perenial ice	N1405702 1m	19970226	57	-72.31	-36.29	N1405702 1m	also phaeopigments, d13C, bacterial abundance, and platelet ice available	no	0	0.4			0.25	62.5			0.3	0.2	7		8.932	202.7	30.19		1.73	1.73	0.055	8.77	10.555	0.98	10.525	115.14	8.67	10.7704	1.00285	10.7398		8.477	8.477	0.2695	42.973	51.7195	4.802	51.5725
ANTARKTIS XIV/3	perenial ice	N1405702 1m	19970226	57	-72.31	-36.29	N1405702 1m	also phaeopigments, d13C, bacterial abundance, and platelet ice available	no	0	0.4			0.35	87.5			0.4	0.3	7.8		21.168	383.42	50.17		1.555	1.555	0.05	4.23	5.835	0.64	9.785	118.53	9.45	9.11719	0.596321	15.2891		6.83801	6.83801	0.219872	18.6012	25.659	2.81436	43.0289
ANTARKTIS XIV/3	Young-Ice	N1405702 3m	19970226	57	-72.31	-36.29	N1405702 3m	also phaeopigments, d13C, bacterial abundance, and platelet ice available	no	1	0.18			0.025	13.8889			0.05	0	7.5		4.962	152.44	17.07		0.665	0.665	0.04	2.02	2.725	0.125	6.51	99.34	9.14	21.8	0.418587	52.08		3.04127	3.04127	0.182933	9.23813	12.4623	0.571667	29.7724
ANTARKTIS XIV/3	Young-Ice	N1405702 3m	19970226	57	-72.31	-36.29	N1405702 3m	also phaeopigments, d13C, bacterial abundance, and platelet ice available	no	0	0.18			0.085	47.2222			0.12	0.05	6.8		14.177	221.94	30.62		0.16	0.16	0.045	3.62	3.825	0.16	6.12	163.08	20.55	23.9062	0.625	38.25		0.807059	0.807059	0.226985	18.2597	19.2937	0.807059	30.87
ANTARKTIS XIV/3	Young-Ice	N1405702 3m	19970226	57	-72.31	-36.29	N1405702 3m	also phaeopigments, d13C, bacterial abundance, and platelet ice available	no	0	0.18			0.15	83.3333			0.18	0.12	10.3		250.88	2290.27	336.54		0.1	0.1	0.105	13.04	13.245	1.995	20.92	332.26	40.72	6.6391	0.633126	10.4862		0.33301	0.33301	0.34966	43.4245	44.1071	6.64354	69.6656
ANTARKTIS XIV/3	Young-Ice	N1405702 7m	19970226	57	-72.31	-36.29	N1405702 7m	also phaeopigments, d13C, bacterial abundance, and platelet ice available	no	1	0.155			0.025	16.129			0.05	0	9.2		4.466	159.52	19.19		0.705	0.705	0.03	0.23	0.965	0.13	9.075	99.73	11.06	7.42308	0.106336	69.8077		2.62842	2.62842	0.111848	0.8575	3.59777	0.484674	33.834
ANTARKTIS XIV/3	Young-Ice	N1405702 7m	19970226	57	-72.31	-36.29	N1405702 7m	also phaeopigments, d13C, bacterial abundance, and platelet ice available	no	0	0.155			0.075	48.3871			0.1	0.05	6.1		21.952	229.74	28.77		0.085	0.085	0.04	1.08	1.205	0.175	5.995	112.88	8.62	6.88571	0.201001	34.2571		0.477951	0.477951	0.224918	6.07279	6.77566	0.984016	33.7096
ANTARKTIS XIV/3	Young-Ice	N1405702 7m	19970226	57	-72.31	-36.29	N1405702 7m	also phaeopigments, d13C, bacterial abundance, and platelet ice available	no	0	0.155			0.1275	82.2581			0.155	0.1	11.3		305.76	5667.12	615.75		0.1	0.1	0.155	5.94	6.195	2.16	44.18	586.25	46.77	2.86806	0.140222	20.4537		0.30354	0.30354	0.470487	18.0303	18.8043	6.55646	134.104
ANTARKTIS XIV/3	Young-Ice	N1405702 9m	19970226	57	-72.31	-36.29	N1405702 9m	also phaeopigments, d13C, bacterial abundance, and platelet ice available	no	1	0.16			0.025	15.625			0.05	0	10		17.771	208.16	24.43		0.295	0.295	0.055	0.68	1.03	0.29	4.345	117.52	7.34	3.55172	0.237054	14.9828		1.01185	1.01185	0.18865	2.3324	3.5329	0.9947	14.9033
ANTARKTIS XIV/3	Young-Ice	N1405702 9m	19970226	57	-72.31	-36.29	N1405702 9m	also phaeopigments, d13C, bacterial abundance, and platelet ice available	no	0	0.16			0.075	46.875			0.1	0.05	6.9		8.435	424.07	41.28		0.025	0.025	0.045	0.42	0.49	0.19	7.035	163.06	13.02	2.57895	0.0696517	37.0263		0.124275	0.124275	0.223696	2.08783	2.4358	0.944493	34.9711
ANTARKTIS XIV/3	Young-Ice	N1405702 9m	19970226	57	-72.31	-36.29	N1405702 9m	also phaeopigments, d13C, bacterial abundance, and platelet ice available	no	0	0.16			0.115	71.875			0.13	0.1	11.6		376.32	5372.27	592.87		0.06	0.06	0.185	6.53	6.775	1.335	51.28	641.54		5.07491	0.132118	38.412		0.177414	0.177414	0.547026	19.3085	20.033	3.94746	151.63
ANTARKTIS XIV/3	Young-Ice	N1405702 9m	19970226	57	-72.31	-36.29	N1405702 9m	also phaeopigments, d13C, bacterial abundance, and platelet ice available	no	0	0.16			0.145	90.625			0.16	0.13	12.9		235.2	2110.11	272.88		1.37	1.37	0.19	8.42	9.98	0.67	25.02	243.09	25.58	14.8955	0.398881	37.3433		3.64271	3.64271	0.505194	22.3881	26.536	1.78147	66.526
ANTARKTIS XIV/3	perenial ice	N1405702 11m	19970226	57	-72.31	-36.29	N1405702 11m	also phaeopigments, d13C, bacterial abundance, and platelet ice available	no	1	0.33			0.02	6.06061			0.04	0	2.9		1.241	171.62	17.32		1.36	1.36	0.07	1.57	3	0.2	4.355	113.58	11.92	15	0.688863	21.775		16.0855	16.0855	0.827931	18.5693	35.4828	2.36552	51.5091
ANTARKTIS XIV/3	perenial ice	N1405702 11m	19970226	57	-72.31	-36.29	N1405702 11m	also phaeopigments, d13C, bacterial abundance, and platelet ice available	no	0	0.33			0.08	24.2424			0.12	0.04	5.1		9.097	201.88	25.21		0.425	0.425	0.06	0.885	1.37	0.18	4.025	99.54	6.46	7.61111	0.340373	22.3611		2.85833	2.85833	0.403529	5.95206	9.21392	1.21059	27.0701
ANTARKTIS XIV/3	perenial ice	N1405702 11m	19970226	57	-72.31	-36.29	N1405702 11m	also phaeopigments, d13C, bacterial abundance, and platelet ice available	no	0	0.33			0.17	51.5152			0.22	0.12	6.1		31.36	579.41	74.13		0.1	0.1	0.06	2.735	2.895	0.8	7.775	216.62	15.92	3.61875	0.372347	9.71875		0.562295	0.562295	0.337377	15.3788	16.2784	4.49836	43.7184
ANTARKTIS XIV/3	perenial ice	N1405702 11m	19970226	57	-72.31	-36.29	N1405702 11m	also phaeopigments, d13C, bacterial abundance, and platelet ice available	no	0	0.33			0.275	83.3333			0.33	0.22	8		172.48	1069.75	146.78		1.46	1.46	0.09	13.92	15.47	4.415	15.43	454.65	43.93	3.50396	1.00259	3.4949		6.25975	6.25975	0.385875	59.682	66.3276	18.9293	66.1561
ANTARKTIS XIV/3	perenial ice	N1405702 15m	19970226	57	-72.31	-36.29	N1405702 15m	also phaeopigments, d13C, bacterial abundance, and platelet ice available	no	1	0.58			0.01	1.72414			0.02	0	3.8		11.992				0.255	0.255	0.11	2.025	2.39	0.45	0.785	274.51	14.83	5.31111	3.04459	1.74444		2.30171	2.30171	0.992895	18.2783	21.5729	4.06184	7.08566
ANTARKTIS XIV/3	perenial ice	N1405702 15m	19970226	57	-72.31	-36.29	N1405702 15m	also phaeopigments, d13C, bacterial abundance, and platelet ice available	no	0	0.58			0.035	6.03448			0.05	0.02	7.3		44.8	1322.46	125.06		0.105	0.105	0.11	2.005	2.22	1.095	6.065	354.79	17.58	2.0274	0.366035	5.53881		0.493356	0.493356	0.516849	9.42075	10.431	5.145	28.4972
ANTARKTIS XIV/3	perenial ice	N1405702 15m	19970226	57	-72.31	-36.29	N1405702 15m	also phaeopigments, d13C, bacterial abundance, and platelet ice available	no	0	0.58			0.075	12.931			0.1	0.05	10		94.08	1837.46	221.43		0.09	0.09	0.08	8.165	8.335	2.625	17.07	506.5	33.86	3.17524	0.488284	6.50286		0.3087	0.3087	0.2744	28.0059	28.589	9.00375	58.5501
ANTARKTIS XIV/3	perenial ice	N1405702 15m	19970226	57	-72.31	-36.29	N1405702 15m	also phaeopigments, d13C, bacterial abundance, and platelet ice available	no	0	0.58			0.145	25			0.19	0.1			40.32	671.41	85.69		0.06	0.06	0.08	8.125	8.265	2.645	17.07	307.09	27.36	3.12476	0.484183	6.45369
ANTARKTIS XIV/3	perenial ice	N1405702 15m	19970226	57	-72.31	-36.29	N1405702 15m	also phaeopigments, d13C, bacterial abundance, and platelet ice available	no	0	0.58			0.245	42.2414			0.3	0.19	4.5		37.632	499.37	61.62		0.345	0.345	0.085	4.62	5.05	1.56	5.795	260.12	21.85	3.23718	0.871441	3.71474		2.62967	2.62967	0.647889	35.2147	38.4922	11.8907	44.1708
ANTARKTIS XIV/3	perenial ice	N1405702 15m	19970226	57	-72.31	-36.29	N1405702 15m	also phaeopigments, d13C, bacterial abundance, and platelet ice available	no	0	0.58			0.35	60.3448			0.4	0.3	4.6		10.916	216.66	24.75		0.765	0.765	0.08	6.14	6.985	2.165	6.925	79.78		3.22633	1.00866	3.19861		5.70424	5.70424	0.596522	45.783	52.0838	16.1434	51.6364
ANTARKTIS XIV/3	perenial ice	N1405702 15m	19970226	57	-72.31	-36.29	N1405702 15m	also phaeopigments, d13C, bacterial abundance, and platelet ice available	no	0	0.58			0.45	77.5862			0.5	0.4	5.4		6.947	172.78	18.95		0.065	0.065	0.04	0.075	0.18	0.075	6.055	61.94	7	2.4	0.0297275	80.7333		0.41287	0.41287	0.254074	0.476389	1.14333	0.476389	38.4605
ANTARKTIS XIV/3	perenial ice	N1405702 15m	19970226	57	-72.31	-36.29	N1405702 15m	also phaeopigments, d13C, bacterial abundance, and platelet ice available	no	0	0.58			0.54	93.1034			0.58	0.5	6.6		18.856	280.39	31.66		0.565	0.565	0.045	0.345	0.955	0.19	7.345	78.14	6.91	5.02632	0.13002	38.6579		2.93629	2.93629	0.233864	1.79295	4.96311	0.987424	38.1717
ANTARKTIS XIV/3	Young-Ice	N1405901 36m	19970228	59	-72.15	-33.09	N1405901 36m	also phaeopigments, d13C, bacterial abundance, and platelet ice available	no	1	0.26			0.015	5.76923			0.03	0	0.4		0.05				0.56	0.56	0.09	1.7	2.35	0.095	0.51	197.92	12.37	24.7368	4.60784	5.36842		48.02	48.02	7.7175	145.775	201.512	8.14625	43.7325
ANTARKTIS XIV/3	Young-Ice	N1405901 36m	19970228	59	-72.15	-33.09	N1405901 36m	also phaeopigments, d13C, bacterial abundance, and platelet ice available	no	0	0.26			0.045	17.3077			0.06	0.03	0.9		0.638	119.77	9.93		0.345	0.345	0.07	1.79	2.205	0.14	0.29	135	9.42	15.75	7.60345	2.07143		13.1483	13.1483	2.66778	68.2189	84.035	5.33556	11.0522
ANTARKTIS XIV/3	Young-Ice	N1405901 36m	19970228	59	-72.15	-33.09	N1405901 36m	also phaeopigments, d13C, bacterial abundance, and platelet ice available	no	0	0.26			0.09	34.6154			0.12	0.06	4.4		14.886	241.87	25.04		0.72	0.72	0.09	4.57	5.38	0.29	0.34	258.43	22.99	18.5517	15.8235	1.17241		5.61273	5.61273	0.701591	35.6252	41.9395	2.26068	2.65045
ANTARKTIS XIV/3	Young-Ice	N1405901 36m	19970228	59	-72.15	-33.09	N1405901 36m	also phaeopigments, d13C, bacterial abundance, and platelet ice available	no	0	0.26			0.15	57.6923			0.18	0.12	3.8		12.901	288.39	25.73		0.625	0.625	0.07	3.71	4.405	0.385	1.38	235.73	17.22	11.4416	3.19203	3.58442		5.64145	5.64145	0.631842	33.4876	39.7609	3.47513	12.4563
ANTARKTIS XIV/3	Young-Ice	N1405901 36m	19970228	59	-72.15	-33.09	N1405901 36m	also phaeopigments, d13C, bacterial abundance, and platelet ice available	no	0	0.26			0.2	76.9231			0.22	0.18	5.4		16.66	276.36	27.79		0.935	0.935	0.08	3.25	4.265	0.775	5.885	249.7	17.32	5.50323	0.724724	7.59355		5.93898	5.93898	0.508148	20.6435	27.0906	4.92269	37.3806
ANTARKTIS XIV/3	Young-Ice	N1405901 36m	19970228	59	-72.15	-33.09	N1405901 36m	also phaeopigments, d13C, bacterial abundance, and platelet ice available	no	0	0.26			0.24	92.3077			0.26	0.22	12.4		105.84	955.07	123.41									436.93
ANTARKTIS XIV/3	Young-Ice	N1405901 37m	19970228	59	-72.15	-33.09	N1405901 37m	also phaeopigments, d13C, bacterial abundance, and platelet ice available	no	1	0.16			0.02	12.5			0.04	0	7		3.234	150.09	13.42		0.345	0.345	0.12	2.41	2.875	0.075	2.02	165.89	13.4	38.3333	1.42327	26.9333		1.6905	1.6905	0.588	11.809	14.0875	0.3675	9.898
ANTARKTIS XIV/3	Young-Ice	N1405901 37m	19970228	59	-72.15	-33.09	N1405901 37m	also phaeopigments, d13C, bacterial abundance, and platelet ice available	no	0	0.16			0.06	37.5			0.08	0.04	3.6		8.27	261.41	21.95		0.235	0.235	0.08	1.26	1.575	0.33	1.37	235.15	12	4.77273	1.14964	4.15152		2.23903	2.23903	0.762222	12.005	15.0062	3.14417	13.0531
ANTARKTIS XIV/3	Young-Ice	N1405901 37m	19970228	59	-72.15	-33.09	N1405901 37m	also phaeopigments, d13C, bacterial abundance, and platelet ice available	no	0	0.16			0.105	65.625			0.13	0.08	5.8		19.848	540.87	44.2		0.005	0.005	0.05	0.76	0.815	0.71	3.595	503.57	17.36	1.14789	0.226704	5.06338		0.029569	0.029569	0.29569	4.49448	4.81974	4.19879	21.2601
ANTARKTIS XIV/3	Young-Ice	N1405901 37m	19970228	59	-72.15	-33.09	N1405901 37m	also phaeopigments, d13C, bacterial abundance, and platelet ice available	no	0	0.16			0.145	90.625			0.16	0.13	11.8		290.08	3240.56	372.65		0.905	0.905	0.117	15.6	16.622	8.72	20.82	1066.79	77.7	1.90619	0.798367	2.38761		2.63064	2.63064	0.340093	45.3458	48.3165	25.3471	60.5192
ANTARKTIS XIV/3	Young-Ice	N1405901 38m	19970228	59	-72.15	-33.09	N1405901 38m	also phaeopigments, d13C, bacterial abundance, and platelet ice available	no	1	0.13			0.025	19.2308			0.05	0	8.8		6.513	259.78	22.4		0.525	0.525	0.15	2.27	2.945	0.18	3.85	200.06	13.13	16.3611	0.764935	21.3889		2.04631	2.04631	0.584659	8.84784	11.4788	0.701591	15.0062
ANTARKTIS XIV/3	Young-Ice	N1405901 38m	19970228	59	-72.15	-33.09	N1405901 38m	also phaeopigments, d13C, bacterial abundance, and platelet ice available	no	0	0.13			0.09	69.2308			0.13	0.05	5.6		10.42	316.4	28.72		0.46	0.46	0.1	2.19	2.75	0.395	4.47	229.47	12.97	6.96203	0.615213	11.3165		2.8175	2.8175	0.6125	13.4137	16.8438	2.41938	27.3787
ANTARKTIS XIV/3	Young-Ice	N1405901 38m	19970228	59	-72.15	-33.09	N1405901 38m	also phaeopigments, d13C, bacterial abundance, and platelet ice available	no	0	0.13			0.13					0.13	12.5		407.68	4993.38	562.17		0.155	0.155	0.09	5.04	5.285	3.6	24.32	541.09	48.13	1.46806	0.217311	6.75556		0.42532	0.42532	0.24696	13.8298	14.502	9.8784	66.7341
ANTARKTIS XIV/3	Young-Ice	N1405901 38m	19970228	59	-72.15	-33.09	N1405901 38m	also phaeopigments, d13C, bacterial abundance, and platelet ice available	no	1								10 cm below the gap		6		34.496	286.12	33.07		2.03	2.03	0.08	2.45	4.56	1.1	9.56	139.92	11.81	4.14545	0.476987	8.69091		11.6048	11.6048	0.457333	14.0058	26.068	6.28833	54.6513
ANTARKTIS XIV/3	Young-Ice	N1406011 Bio 2	19970301	61	-71.59	-26.01	N1406011 Bio 2	also phaeopigments, d13C, bacterial abundance, and platelet ice available	no	1	0.13			0.03	23.0769			0.06	0	6.8		8.93	174.24	20.16		0.14	0.14	0.04	2.085	2.265	0.305	1.945	276.8	37.93	7.42623	1.16452	6.37705		0.706176	0.706176	0.201765	10.517	11.4249	1.53846	9.81081
ANTARKTIS XIV/3	Young-Ice	N1406011 Bio 2	19970301	61	-71.59	-26.01	N1406011 Bio 2	also phaeopigments, d13C, bacterial abundance, and platelet ice available	no	0	0.13			0.08	61.5385			0.1	0.06	7.9		44.43	784.14	77.42		0.17	0.17	0.055	3.085	3.31	0.43	2.815	427.52	36.34	7.69767	1.17584	6.54651		0.738101	0.738101	0.238797	13.3944	14.3713	1.86696	12.2221
ANTARKTIS XIV/3	Young-Ice	N1406011 Bio 2	19970301	61	-71.59	-26.01	N1406011 Bio 2	also phaeopigments, d13C, bacterial abundance, and platelet ice available	no	0	0.13			0.115	88.4615			0.13	0.1	12		439.04	4665.35	505.26		0.71	0.71	0.187	12.08	12.977	8.24	10.987	1841.89	47.36	1.57488	1.18112	1.33337		2.02942	2.02942	0.534508	34.5287	37.0926	23.5527	31.4045
ANTARKTIS XIV/3	Young-Ice	N1406011 Bio 1	19970301	60	-71.59	-26.01	N1406011 Bio 1	also phaeopigments, d13C, bacterial abundance, and platelet ice available	no	1	0.17			0.0425	25			0.085	0	7.6		18.36	262.91	32.86		0.05	0.05	0.04	1.3	1.39	0.315	27.917	314.85	16.01	4.4127	20.0842	88.6254		0.225658	0.225658	0.180526	5.86711	6.27329	1.42164	125.994
ANTARKTIS XIV/3	Young-Ice	N1406011 Bio 1	19970301	60	-71.59	-26.01	N1406011 Bio 1	also phaeopigments, d13C, bacterial abundance, and platelet ice available	no	0	0.17			0.1275	75			0.17	0.085	10.7		282.24	6013.67	580.47		1.08	1.08	0.142	7.56	8.782	4.28	14.6	1338.61	65.26	2.05187	1.66249	3.41121		3.46206	3.46206	0.455196	24.2344	28.1516	13.72	46.8019
ANTARKTIS XIV/3	Young-Ice	N1406112 New Ice Core 6	19970302	61	-72.23	-17.49	N1406112 New Ice Core 6	also phaeopigments, d13C, bacterial abundance, and platelet ice available	no	1	0.17			0.0425	25			0.085	0	15.2		40.77				8.885	8.885	0.22	11.88	20.985	7.355	27.21		20.13	2.85316	1.29664	3.69952		20.0497	20.0497	0.496447	26.8082	47.3543	16.5971	61.4015
ANTARKTIS XIV/3	Young-Ice	N1406112 New Ice Core 6	19970302	61	-72.23	-17.49	N1406112 New Ice Core 6	also phaeopigments, d13C, bacterial abundance, and platelet ice available	no	0	0.17			0.1275	75			0.17	0.085	14.8		31.36	297.54	54.07		4.695	4.695	0.145	6.17	11.01	0.845	15.49		7.05	13.0296	1.4069	18.3314		10.881	10.881	0.336047	14.2994	25.5164	1.95834	35.8991
ANTARKTIS XIV/3	Young-Ice	N1406112 New Ice Core 1	19970302	62	-72.23	-17.49	N1406112 New Ice Core 1	also phaeopigments, d13C, bacterial abundance, and platelet ice available	no	1	0.17			0.0425	25			0.085	0	17.2		36.96	390.44	65.41		10.395	10.395	0.145	5.3	15.84	9.56	27.917	186.48		1.6569	0.567396	2.92019		20.7296	20.7296	0.289157	10.5692	31.5879	19.0644	55.6717
ANTARKTIS XIV/3	Young-Ice	N1406112 New Ice Core 1	19970302	62	-72.23	-17.49	N1406112 New Ice Core 1	also phaeopigments, d13C, bacterial abundance, and platelet ice available	no	0	0.17			0.1275	75			0.17	0.085	12.3		20.16	133.67	23.93		5.745	5.745	0.15	4.15	10.045	0.64	14.6	69.11	14.03	15.6953	0.688014	22.8125		16.0206	16.0206	0.418293	11.5728	28.0117	1.78472	40.7138
ANTARKTIS XIV/3	Young-Ice	N1406112 New Ice Core 2	19970302	62	-72.23	-17.49	N1406112 New Ice Core 2	also phaeopigments, d13C, bacterial abundance, and platelet ice available	no	1	0.17			0.0425	25			0.085	0	13.1		41.16	243.76	55.39		7.865	7.865	0.22	9.52	17.605	6.515	19.74		22.2	2.70223	0.891844	3.02993		20.5931	20.5931	0.576031	24.9264	46.0955	17.0584	51.6856
ANTARKTIS XIV/3	Young-Ice	N1406112 New Ice Core 2	19970302	62	-72.23	-17.49	N1406112 New Ice Core 2	also phaeopigments, d13C, bacterial abundance, and platelet ice available	no	0	0.17			0.1275	75			0.17	0.085	14.6		31.36	307	59.04		5.04	5.04	0.2	4.98	10.22	0.93	16.75		7.71	10.9892	0.610149	18.0108		11.8405	11.8405	0.469863	11.6996	24.01	2.18486	39.351
ANTARKTIS XIV/3	Young-Ice	N1406112 New Ice Core 3	19970302	62	-72.23	-17.49	N1406112 New Ice Core 3	also phaeopigments, d13C, bacterial abundance, and platelet ice available	no	1	0.17			0.0425	25			0.085	0	14.2		31.36	333.61	57.82		8.54	8.54	0.15	7.39	16.08	4.15	20.82	110.54	19.05	3.8747	0.772334	5.01687		20.6283	20.6283	0.362324	17.8505	38.8411	10.0243	50.2906
ANTARKTIS XIV/3	Young-Ice	N1406112 New Ice Core 3	19970302	62	-72.23	-17.49	N1406112 New Ice Core 3	also phaeopigments, d13C, bacterial abundance, and platelet ice available	no	0	0.17			0.1275	75			0.17	0.085	13		36.96	334.79	53.16		5.105	5.105	0.165	6.06	11.33	1.83	14.89	64.72	9.9	6.19126	0.760913	8.13661		13.4693	13.4693	0.435346	15.9891	29.8938	4.82838	39.2867
ANTARKTIS XIV/3	Young-Ice	N1406112 New Ice Core 4	19970302	62	-72.23	-17.49	N1406112 New Ice Core 4	also phaeopigments, d13C, bacterial abundance, and platelet ice available	no	1	0.17			0.0425	25			0.085	0	16.1		23.52	239.49	43.02		9.98	9.98	0.155	4.47	14.605	6.09	23.76		13.76	2.39819	0.614689	3.90148		21.2617	21.2617	0.330217	9.52304	31.115	12.9743	50.6191
ANTARKTIS XIV/3	Young-Ice	N1406112 New Ice Core 4	19970302	62	-72.23	-17.49	N1406112 New Ice Core 4	also phaeopigments, d13C, bacterial abundance, and platelet ice available	no	0	0.17			0.1275	75			0.17	0.085	14.4		19.85	206.75	30.54		6.91	6.91	0.15	3.02	10.08	0.755	17.39		5.49	13.351	0.579643	23.0331		16.4592	16.4592	0.357292	7.19347	24.01	1.79837	41.422
ANTARKTIS XIV/3	Young-Ice	N1406112 New Ice Core 5	19970302	62	-72.23	-17.49	N1406112 New Ice Core 5	also phaeopigments, d13C, bacterial abundance, and platelet ice available	no	1	0.17			0.0425	25			0.085	0	15.5		34.5	471.42	76.37		9.16	9.16	0.17	6.81	16.14	6.51	22.72	98.37	15.89	2.47926	0.710387	3.49002		20.2702	20.2702	0.376194	15.0699	35.7163	14.406	50.2772
ANTARKTIS XIV/3	Young-Ice	N1406112 New Ice Core 5	19970302	62	-72.23	-17.49	N1406112 New Ice Core 5	also phaeopigments, d13C, bacterial abundance, and platelet ice available	no	0	0.17			0.1275	75			0.17	0.085	15.1		18.82	173.16	26.69		7.91	7.91	0.155	5.59	13.655	1.245	18.03	52.54	7.3	10.9679	0.757349	14.4819		17.9677	17.9677	0.352086	12.6978	31.0176	2.82805	40.9556
ANTARKTIS XIV/3	Young-Ice	N1406112 New Ice Core 7	19970302	62	-72.23	-17.49	N1406112 New Ice Core 7	also phaeopigments, d13C, bacterial abundance, and platelet ice available	no	1	0.17			0.0425	25			0.085	0	15.5		65.99	753.32	146.63		8.16	8.16	0.245	14.98	23.385	5.08	29.17	86.02	14.06	4.60335	0.80168	5.74213		18.0573	18.0573	0.542161	33.1493	51.7487	11.2415	64.5504
ANTARKTIS XIV/3	Young-Ice	N1406112 New Ice Core 7	19970302	62	-72.23	-17.49	N1406112 New Ice Core 7	also phaeopigments, d13C, bacterial abundance, and platelet ice available	no	0	0.17			0.1275	75			0.17	0.085	14.3		34.5	402.76	77.73		4.575	4.575	0.165	6.2	10.94	0.815	14.99		7.29	13.4233	0.72982	18.3926		10.9736	10.9736	0.395769	14.8713	26.2407	1.95486	35.955
AURORA1997-V2		V2971	19971006	280	-64.95	109.22	V297/1	Pack Ice. Bulk salinity in (ppt). No decimal to salinity	no	1	2.33	0.3		0.025	1.07296			0.05	0	0		0.2				1.89	1.89				0.16	3.86					24.125
AURORA1997-V2		V2971	19971006	280	-64.95	109.22	V297/1	Pack Ice. Bulk salinity in (ppt). No decimal to salinity	no	0	2.33	0.3		0.1	4.29185			0.15	0.05	1		1.03				0.76	0.76				0.15	8.35					55.6667		26.068	26.068				5.145	286.405
AURORA1997-V2		V2971	19971006	280	-64.95	109.22	V297/1	Pack Ice. Bulk salinity in (ppt). No decimal to salinity	no	0	2.33	0.3		0.2	8.58369			0.25	0.15	0		2.93				0.07	0.07				0.39	7.29					18.6923
AURORA1997-V2		V2971	19971006	280	-64.95	109.22	V297/1	Pack Ice. Bulk salinity in (ppt). No decimal to salinity	no	0	2.33	0.3		0.3	12.8755			0.35	0.25	2		2.51				0.1	0.1				0.26	2.29					8.80769		1.715	1.715				4.459	39.2735
AURORA1997-V2		V2971	19971006	280	-64.95	109.22	V297/1	Pack Ice. Bulk salinity in (ppt). No decimal to salinity	no	0	2.33	0.3		0.4	17.1674			0.45	0.35	0		2.08				0.1	0.1				0.24	1.71					7.125
AURORA1997-V2		V2971	19971006	280	-64.95	109.22	V297/1	Pack Ice. Bulk salinity in (ppt). No decimal to salinity	no	0	2.33	0.3		0.5	21.4592			0.55	0.45	1		6.03				0.1	0.1				0.68	0.61					0.897059		3.43	3.43				23.324	20.923
AURORA1997-V2		V2971	19971006	280	-64.95	109.22	V297/1	Pack Ice. Bulk salinity in (ppt). No decimal to salinity	no	0	2.33	0.3		0.6	25.7511			0.65	0.55	0		11.32				0.3	0.3				0.57	0.41					0.719298
AURORA1997-V2		V2971	19971006	280	-64.95	109.22	V297/1	Pack Ice. Bulk salinity in (ppt). No decimal to salinity	no	0	2.33	0.3		0.7	30.0429			0.75	0.65	0		9.09				0.23	0.23				0.44	0.41					0.931818
AURORA1997-V2		V2971	19971006	280	-64.95	109.22	V297/1	Pack Ice. Bulk salinity in (ppt). No decimal to salinity	no	0	2.33	0.3		0.8	34.3348			0.85	0.75	0		6.1				0.22	0.22				0.25	0.31					1.24
AURORA1997-V2		V2971	19971006	280	-64.95	109.22	V297/1	Pack Ice. Bulk salinity in (ppt). No decimal to salinity	no	0	2.33	0.3		0.9	38.6266			0.95	0.85	0		1.95				0.34	0.34				0.15	0.53					3.53333
AURORA1997-V2		V2971	19971006	280	-64.95	109.22	V297/1	Pack Ice. Bulk salinity in (ppt). No decimal to salinity	no	0	2.33	0.3		1	42.9185			1.05	0.95	0		1.92				1.94	1.94	0.84			0.16	0.58					3.625
AURORA1997-V2		V2971	19971006	280	-64.95	109.22	V297/1	Pack Ice. Bulk salinity in (ppt). No decimal to salinity	no	0	2.33	0.3		1.1	47.2103			1.15	1.05	0		1.15				1.97	1.97	0.86			0.13	1.14					8.76923
AURORA1997-V2		V2971	19971006	280	-64.95	109.22	V297/1	Pack Ice. Bulk salinity in (ppt). No decimal to salinity	no	0	2.33	0.3		1.2	51.5021			1.25	1.15	1		1.38				2.45	2.45	0.91			0.25	2.78					11.12		84.035	84.035	31.213			8.575	95.354
AURORA1997-V2		V2971	19971006	280	-64.95	109.22	V297/1	Pack Ice. Bulk salinity in (ppt). No decimal to salinity	no	0	2.33	0.3		1.3	55.794			1.35	1.25	2		1.41				2.62	2.62	1.13			0.2	3.56					17.8		44.933	44.933	19.3795			3.43	61.054
AURORA1997-V2		V2971	19971006	280	-64.95	109.22	V297/1	Pack Ice. Bulk salinity in (ppt). No decimal to salinity	no	0	2.33	0.3		1.4	60.0858			1.45	1.35	3		1.51				4.57	4.57	1.34			0.32	5.91					18.4688		52.2503	52.2503	15.3207			3.65867	67.571
AURORA1997-V2		V2971	19971006	280	-64.95	109.22	V297/1	Pack Ice. Bulk salinity in (ppt). No decimal to salinity	no	0	2.33	0.3		1.5	64.3777			1.55	1.45	2		2.26				3.63	3.63	1.01			0.27	6.43					23.8148		62.2545	62.2545	17.3215			4.6305	110.274
AURORA1997-V2		V2971	19971006	280	-64.95	109.22	V297/1	Pack Ice. Bulk salinity in (ppt). No decimal to salinity	no	0	2.33	0.3		1.6	68.6695			1.65	1.55	3		4.11				1.42	1.42	1.41			0.16	2.84					17.75		16.2353	16.2353	16.121			1.82933	32.4707
AURORA1997-V2		V2971	19971006	280	-64.95	109.22	V297/1	Pack Ice. Bulk salinity in (ppt). No decimal to salinity	no	0	2.33	0.3		1.7	72.9614			1.75	1.65	3		4.49				3	3	1.12			0.26	5.53					21.2692		34.3	34.3	12.8053			2.97267	63.2263
AURORA1997-V2		V2971	19971006	280	-64.95	109.22	V297/1	Pack Ice. Bulk salinity in (ppt). No decimal to salinity	no	0	2.33	0.3		1.8	77.2532			1.85	1.75	1		3.83				2.74	2.74	1.22			0.23	5.16					22.4348		93.982	93.982	41.846			7.889	176.988
AURORA1997-V2		V2971	19971006	280	-64.95	109.22	V297/1	Pack Ice. Bulk salinity in (ppt). No decimal to salinity	no	0	2.33	0.3		1.9	81.5451			1.95	1.85	3		1.48				2.18	2.18	1.31			0.17	3.51					20.6471		24.9247	24.9247	14.9777			1.94367	40.131
AURORA1997-V2		V2971	19971006	280	-64.95	109.22	V297/1	Pack Ice. Bulk salinity in (ppt). No decimal to salinity	no	0	2.33	0.3		2	85.8369			2.05	1.95	2		1.96				3.05	3.05				0.17	5.75					33.8235		52.3075	52.3075				2.9155	98.6125
AURORA1997-V2		V2971	19971006	280	-64.95	109.22	V297/1	Pack Ice. Bulk salinity in (ppt). No decimal to salinity	no	0	2.33	0.3		2.1	90.1288			2.15	2.05	1		1.58				1.84	1.84				0.15	3.76					25.0667		63.112	63.112				5.145	128.968
AURORA1997-V2		V2971	19971006	280	-64.95	109.22	V297/1	Pack Ice. Bulk salinity in (ppt). No decimal to salinity	no	0	2.33	0.3		2.2	94.4206			2.25	2.15	2		1.23				2.43	2.43				0.22	5.01					22.7727		41.6745	41.6745				3.773	85.9215
AURORA1997-V2		V2971	19971006	280	-64.95	109.22	V297/1	Pack Ice. Bulk salinity in (ppt). No decimal to salinity	no	0	2.33	0.3		2.29	98.2833			2.33	2.25	9		1.01				4.56	4.56	1.76			0.45	12.68					28.1778		17.3787	17.3787	6.70756			1.715	48.3249
AURORA1997-V2		V2972	19971009	283	-62.73	105.3	V297/2	Pack Ice. Bulk salinity in (ppt). No decimal to salinity	no	1	0.55	0.1		0.025	4.54545			0.05	0	3		2.27				4.78	4.78	6.26			0.62	7.39					11.9194		54.6513	54.6513	71.5727			7.08867	84.4923
AURORA1997-V2		V2972	19971009	283	-62.73	105.3	V297/2	Pack Ice. Bulk salinity in (ppt). No decimal to salinity	no	0	0.55	0.1		0.1	18.1818			0.15	0.05	2		2.76				1.26	1.26	4.21			0.64	4.77					7.45312		21.609	21.609	72.2015			10.976	81.8055
AURORA1997-V2		V2972	19971009	283	-62.73	105.3	V297/2	Pack Ice. Bulk salinity in (ppt). No decimal to salinity	no	0	0.55	0.1		0.2	36.3636			0.25	0.15	1		1.59				0.08	0.08	3.11			0.28	1.75					6.25		2.744	2.744	106.673			9.604	60.025
AURORA1997-V2		V2972	19971009	283	-62.73	105.3	V297/2	Pack Ice. Bulk salinity in (ppt). No decimal to salinity	no	0	0.55	0.1		0.3	54.5455			0.35	0.25	0		0.51				0.89	0.89	3.72			0.3	1.11					3.7
AURORA1997-V2		V2972	19971009	283	-62.73	105.3	V297/2	Pack Ice. Bulk salinity in (ppt). No decimal to salinity	no	0	0.55	0.1		0.4	72.7273			0.45	0.35	0		1.3				0	0	2.91			0.26	1.01					3.88462
AURORA1997-V2		V2972	19971009	283	-62.73	105.3	V297/2	Pack Ice. Bulk salinity in (ppt). No decimal to salinity	no	0	0.55	0.1		0.5	90.9091			0.55	0.45	0		2.9				0.22	0.22	3.1			0.26	1.25					4.80769
AURORA1997-V2		V2972	19971009	283	-62.73	105.3	V297/3	Pack Ice. Bulk salinity in (ppt). No decimal to salinity	no	1	0.27	0.1		0.025	9.25926			0.05	0	3		0.52				3.38	3.38	2.75			0.35	8.16					23.3143		38.6447	38.6447	31.4417			4.00167	93.296
AURORA1997-V2		V2972	19971009	283	-62.73	105.3	V297/3	Pack Ice. Bulk salinity in (ppt). No decimal to salinity	no	0	0.27	0.1		0.1	37.037			0.15	0.05	1		0.64				1.26	1.26	3.12			0.21	3.92					18.6667		43.218	43.218	107.016			7.203	134.456
AURORA1997-V2		V2972	19971009	283	-62.73	105.3	V297/3	Pack Ice. Bulk salinity in (ppt). No decimal to salinity	no	0	0.27	0.1		0.21	77.7778			0.27	0.15	0		0.83				0.14	0.14	2.87			0.17	2.22					13.0588
AURORA1997-V2		V2972	19971009	283	-62.73	105.3	V297/4	Pack Ice. Bulk salinity in (ppt). No decimal to salinity	no	1	0.54	0.1		0.025	4.62963			0.05	0	3		0.99				1.68	1.68	2.02			0.47	5.37					11.4255		19.208	19.208	23.0953			5.37367	61.397
AURORA1997-V2		V2972	19971009	283	-62.73	105.3	V297/4	Pack Ice. Bulk salinity in (ppt). No decimal to salinity	no	0	0.54	0.1		0.1	18.5185			0.15	0.05	2		0.59				1.7	1.7	1.48			0.18	3.85					21.3889		29.155	29.155	25.382			3.087	66.0275
AURORA1997-V2		V2972	19971009	283	-62.73	105.3	V297/4	Pack Ice. Bulk salinity in (ppt). No decimal to salinity	no	0	0.54	0.1		0.2	37.037			0.25	0.15	3		1.13				1.41	1.41	1.37			0.22	2.79					12.6818		16.121	16.121	15.6637			2.51533	31.899
AURORA1997-V2		V2972	19971009	283	-62.73	105.3	V297/4	Pack Ice. Bulk salinity in (ppt). No decimal to salinity	no	0	0.54	0.1		0.3	55.5556			0.35	0.25	0		1.24				0.26	0.26	2.21			0.28	1.52					5.42857
AURORA1997-V2		V2972	19971009	283	-62.73	105.3	V297/4	Pack Ice. Bulk salinity in (ppt). No decimal to salinity	no	0	0.54	0.1		0.4	74.0741			0.45	0.35	0		2.99				0.03	0.03	2.28			0.25	1.35					5.4
AURORA1997-V2		V2972	19971009	283	-62.73	105.3	V297/4	Pack Ice. Bulk salinity in (ppt). No decimal to salinity	no	0	0.54	0.1		0.495	91.6667			0.54	0.45	2		5.14				1.8	1.8	2.17			0.59	2.27					3.84746		30.87	30.87	37.2155			10.1185	38.9305
AURORA1997-V2		V2973	19971010	283	-62.18	101.35	V297/5	Pack Ice. Bulk salinity in (ppt).	no	1	1.34	0.5		0.025	1.86567			0.05	0	11		2.54				0.88	0.88	1.86			0.42	2.73					6.5		2.744	2.744	5.79982			1.30964	8.51264
AURORA1997-V2		V2973	19971010	283	-62.18	101.35	V297/5	Pack Ice. Bulk salinity in (ppt).	no	0	1.34	0.5		0.1	7.46269			0.15	0.05	5		2.74				1.23	1.23	0.83			0.19	1.03					5.42105		8.4378	8.4378	5.6938			1.3034	7.0658
AURORA1997-V2		V2973	19971010	283	-62.18	101.35	V297/5	Pack Ice. Bulk salinity in (ppt).	no	0	1.34	0.5		0.2	14.9254			0.25	0.15	5		3.37				1.39	1.39	0.64			0.21	1.07					5.09524		9.5354	9.5354	4.3904			1.4406	7.3402
AURORA1997-V2		V2973	19971010	283	-62.18	101.35	V297/5	Pack Ice. Bulk salinity in (ppt).	no	0	1.34	0.5		0.3	22.3881			0.35	0.25	5		1.92				1.15	1.15	0.72			0.19	1.01					5.31579		7.889	7.889	4.9392			1.3034	6.9286
AURORA1997-V2		V2973	19971010	283	-62.18	101.35	V297/5	Pack Ice. Bulk salinity in (ppt).	no	0	1.34	0.5		0.4	29.8507			0.45	0.35	4		2.68				0.75	0.75	0.77			0.24	0.84					3.5		6.43125	6.43125	6.60275			2.058	7.203
AURORA1997-V2		V2973	19971010	283	-62.18	101.35	V297/5	Pack Ice. Bulk salinity in (ppt).	no	0	1.34	0.5		0.5	37.3134			0.55	0.45	3		3.18				0.51	0.51	0.81			0.21	0.79					3.7619		5.831	5.831	9.261			2.401	9.03233
AURORA1997-V2		V2973	19971010	283	-62.18	101.35	V297/5	Pack Ice. Bulk salinity in (ppt).	no	0	1.34	0.5		0.6	44.7761			0.65	0.55	3		2.33				1.19	1.19	0.81			0.21	0.82					3.90476		13.6057	13.6057	9.261			2.401	9.37533
AURORA1997-V2		V2973	19971010	283	-62.18	101.35	V297/5	Pack Ice. Bulk salinity in (ppt).	no	0	1.34	0.5		0.7	52.2388			0.75	0.65	2		2.09				1.22	1.22	0.69			0.2	0.7					3.5		20.923	20.923	11.8335			3.43	12.005
AURORA1997-V2		V2973	19971010	283	-62.18	101.35	V297/5	Pack Ice. Bulk salinity in (ppt).	no	0	1.34	0.5		0.8	59.7015			0.85	0.75	2		4.12				0.99	0.99	0.56			0.24	0.65					2.70833		16.9785	16.9785	9.604			4.116	11.1475
AURORA1997-V2		V2973	19971010	283	-62.18	101.35	V297/5	Pack Ice. Bulk salinity in (ppt).	no	0	1.34	0.5		0.9	67.1642			0.95	0.85	1		2.68				1.08	1.08	0.83			0.35	0.64					1.82857		37.044	37.044	28.469			12.005	21.952
AURORA1997-V2		V2973	19971010	283	-62.18	101.35	V297/5	Pack Ice. Bulk salinity in (ppt).	no	0	1.34	0.5		1	74.6269			1.05	0.95	4		6.37				1.87	1.87	0.91			0.42	2.12					5.04762		16.0353	16.0353	7.80325			3.6015	18.179
AURORA1997-V2		V2973	19971010	283	-62.18	101.35	V297/5	Pack Ice. Bulk salinity in (ppt).	no	0	1.34	0.5		1.1	82.0896			1.15	1.05	3		4.68				2.21	2.21	0.72			0.3	2.46					8.2		25.2677	25.2677	8.232			3.43	28.126
AURORA1997-V2		V2973	19971010	283	-62.18	101.35	V297/5	Pack Ice. Bulk salinity in (ppt).	no	0	1.34	0.5		1.2	89.5522			1.25	1.15	2		5.2				3.73	3.73	0.86			0.35	5.55					15.8571		63.9695	63.9695	14.749			6.0025	95.1825
AURORA1997-V2		V2973	19971010	283	-62.18	101.35	V297/5	Pack Ice. Bulk salinity in (ppt).	no	0	1.34	0.5		1.295	96.6418			1.34	1.25	4		4.28				3.98	3.98	0.58			0.32	5.82					18.1875		34.1285	34.1285	4.9735			2.744	49.9065
AURORA1997-V2		V2973	19971010	284	-62.18	101.35	V297/6	Pack Ice. Bulk salinity in (ppt). No decimal to salinity	no	1	1.88	0.5		0.025	1.32979			0.05	0	3		0.17				3.61	3.61	0.87			0.16	3.86					24.125		41.2743	41.2743	9.947			1.82933	44.1327
AURORA1997-V2		V2973	19971010	284	-62.18	101.35	V297/6	Pack Ice. Bulk salinity in (ppt). No decimal to salinity	no	0	1.88	0.5		0.1	5.31915			0.15	0.05	5		0.5				2.92	2.92	0.81			0.15	8.35					55.6667		20.0312	20.0312	5.5566			1.029	57.281
AURORA1997-V2		V2973	19971010	284	-62.18	101.35	V297/6	Pack Ice. Bulk salinity in (ppt). No decimal to salinity	no	0	1.88	0.5		0.2	10.6383			0.25	0.15	4		0.4				1.98	1.98	0.49			0.39	7.29					18.6923		16.9785	16.9785	4.20175			3.34425	62.5117
AURORA1997-V2		V2973	19971010	284	-62.18	101.35	V297/6	Pack Ice. Bulk salinity in (ppt). No decimal to salinity	no	0	1.88	0.5		0.3	15.9574			0.35	0.25	4		0.32				1.95	1.95	0.42			0.26	2.29					8.80769		16.7212	16.7212	3.6015			2.2295	19.6367
AURORA1997-V2		V2973	19971010	284	-62.18	101.35	V297/6	Pack Ice. Bulk salinity in (ppt). No decimal to salinity	no	0	1.88	0.5		0.4	21.2766			0.45	0.35	3		0.49				1.58	1.58	0.83			0.24	1.71					7.125		18.0647	18.0647	9.48967			2.744	19.551
AURORA1997-V2		V2973	19971010	284	-62.18	101.35	V297/6	Pack Ice. Bulk salinity in (ppt). No decimal to salinity	no	0	1.88	0.5		0.5	26.5957			0.55	0.45	4		0.58				0.73	0.73	0.86			0.68	0.61					0.897059		6.25975	6.25975	7.3745			5.831	5.23075
AURORA1997-V2		V2973	19971010	284	-62.18	101.35	V297/6	Pack Ice. Bulk salinity in (ppt). No decimal to salinity	no	0	1.88	0.5		0.6	31.9149			0.65	0.55	4		0.5				1.08	1.08	0.63			0.57	0.41					0.719298		9.261	9.261	5.40225			4.88775	3.51575
AURORA1997-V2		V2973	19971010	284	-62.18	101.35	V297/6	Pack Ice. Bulk salinity in (ppt). No decimal to salinity	no	0	1.88	0.5		0.7	37.234			0.75	0.65	3		0.63				0.47	0.47	0.88			0.44	0.41					0.931818		5.37367	5.37367	10.0613			5.03067	4.68767
AURORA1997-V2		V2973	19971010	284	-62.18	101.35	V297/6	Pack Ice. Bulk salinity in (ppt). No decimal to salinity	no	0	1.88	0.5		0.8	42.5532			0.85	0.75	3		1.09				0.55	0.55	0.84			0.25	0.31					1.24		6.28833	6.28833	9.604			2.85833	3.54433
AURORA1997-V2		V2973	19971010	284	-62.18	101.35	V297/6	Pack Ice. Bulk salinity in (ppt). No decimal to salinity	no	0	1.88	0.5		0.9	47.8723			0.95	0.85	6		0.79				0.13	0.13	1.63			0.15	0.53					3.53333		0.743167	0.743167	9.31817			0.8575	3.02983
AURORA1997-V2		V2973	19971010	284	-62.18	101.35	V297/6	Pack Ice. Bulk salinity in (ppt). No decimal to salinity	no	0	1.88	0.5		1	53.1915			1.05	0.95	7						4.13	4.13	1.46			0.16	0.58					3.625		20.237	20.237	7.154			0.784	2.842
AURORA1997-V2		V2973	19971010	284	-62.18	101.35	V297/6	Pack Ice. Bulk salinity in (ppt). No decimal to salinity	no	0	1.88	0.5		1.1	58.5106			1.15	1.05	5		0.82				4.12	4.12	1.12			0.13	1.14					8.76923		28.2632	28.2632	7.6832			0.8918	7.8204
AURORA1997-V2		V2973	19971010	284	-62.18	101.35	V297/6	Pack Ice. Bulk salinity in (ppt). No decimal to salinity	no	0	1.88	0.5		1.2	63.8298			1.25	1.15	5		0.82				4.24	4.24	0.78			0.25	2.78					11.12		29.0864	29.0864	5.3508			1.715	19.0708
AURORA1997-V2		V2973	19971010	284	-62.18	101.35	V297/6	Pack Ice. Bulk salinity in (ppt). No decimal to salinity	no	0	1.88	0.5		1.3	69.1489			1.35	1.25	5		0.99				4.31	4.31	1.32			0.2	3.56					17.8		29.5666	29.5666	9.0552			1.372	24.4216
AURORA1997-V2		V2973	19971010	284	-62.18	101.35	V297/6	Pack Ice. Bulk salinity in (ppt). No decimal to salinity	no	0	1.88	0.5		1.4	74.4681			1.45	1.35	7		0.92				4.78	4.78	1.27			0.32	5.91					18.4688		23.422	23.422	6.223			1.568	28.959
AURORA1997-V2		V2973	19971010	284	-62.18	101.35	V297/6	Pack Ice. Bulk salinity in (ppt). No decimal to salinity	no	0	1.88	0.5		1.5	79.7872			1.55	1.45	6						4.45	4.45	1.24			0.27	6.43					23.8148		25.4392	25.4392	7.08867			1.5435	36.7582
AURORA1997-V2		V2973	19971010	284	-62.18	101.35	V297/6	Pack Ice. Bulk salinity in (ppt). No decimal to salinity	no	0	1.88	0.5		1.6	85.1064			1.65	1.55	3						2.47	2.47	4.34			0.16	2.84					17.75		28.2403	28.2403	49.6207			1.82933	32.4707
AURORA1997-V2		V2973	19971010	284	-62.18	101.35	V297/6	Pack Ice. Bulk salinity in (ppt). No decimal to salinity	no	0	1.88	0.5		1.7	90.4255			1.75	1.65	4		2.86				2.84	2.84	3.15			0.26	5.53					21.2692		24.353	24.353	27.0112			2.2295	47.4198
AURORA1997-V2		V2973	19971010	284	-62.18	101.35	V297/6	Pack Ice. Bulk salinity in (ppt). No decimal to salinity	no	0	1.88	0.5		1.815	96.5426			1.88	1.75	7		3.21				9.57	9.57	0.97			0.23	5.16					22.4348		46.893	46.893	4.753			1.127	25.284
AURORA1997-V2		V2974	19971013	287	-62.35	83.28	V297/7	Pack Ice. Bulk salinity in (ppt). No decimal to salinity	no	1	0.46	0.15		0.025	5.43478			0.05	0	8		2.49				0.81	0.81	0.33			0.63	3.81					6.04762		3.47288	3.47288	1.41487			2.70112	16.3354
AURORA1997-V2		V2974	19971013	287	-62.35	83.28	V297/7	Pack Ice. Bulk salinity in (ppt). No decimal to salinity	no	0	0.46	0.15		0.1	21.7391			0.15	0.05	6		3.25				0.3	0.3	0.78			0.45	2.07					4.6		1.715	1.715	4.459			2.5725	11.8335
AURORA1997-V2		V2974	19971013	287	-62.35	83.28	V297/7	Pack Ice. Bulk salinity in (ppt). No decimal to salinity	no	0	0.46	0.15		0.2	43.4783			0.25	0.15	7		8.5				1.13	1.13	0.26			1	1.75					1.75		5.537	5.537	1.274			4.9	8.575
AURORA1997-V2		V2974	19971013	287	-62.35	83.28	V297/7	Pack Ice. Bulk salinity in (ppt). No decimal to salinity	no	0	0.46	0.15		0.3	65.2174			0.35	0.25	5		7.94				0.79	0.79	0.54			0.92	1.18					1.28261		5.4194	5.4194	3.7044			6.3112	8.0948
AURORA1997-V2		V2974	19971013	287	-62.35	83.28	V297/7	Pack Ice. Bulk salinity in (ppt). No decimal to salinity	no	0	0.46	0.15		0.405	88.0435			0.46	0.35	2		5.03				1.4	1.4	0.52			0.86	0.89					1.03488		24.01	24.01	8.918			14.749	15.2635
AURORA1997-V2		V2974	19971013	287	-62.35	83.28	V297/8	Pack Ice. Bulk salinity in (ppt). No decimal to salinity	no	1	0.62	0.15		0.025	4.03226			0.05	0	7		2.84				2.84	2.84	0.13			0.78	8.2					10.5128		13.916	13.916	0.637			3.822	40.18
AURORA1997-V2		V2974	19971013	287	-62.35	83.28	V297/8	Pack Ice. Bulk salinity in (ppt). No decimal to salinity	no	0	0.62	0.15		0.1	16.129			0.15	0.05	4						0.55	0.55				0.14	4.59					32.7857		4.71625	4.71625				1.2005	39.3592
AURORA1997-V2		V2974	19971013	287	-62.35	83.28	V297/8	Pack Ice. Bulk salinity in (ppt). No decimal to salinity	no	0	0.62	0.15		0.2	32.2581			0.25	0.15	3		0.76				0.47	0.47				0.22	2.68					12.1818		5.37367	5.37367				2.51533	30.6413
AURORA1997-V2		V2974	19971013	287	-62.35	83.28	V297/8	Pack Ice. Bulk salinity in (ppt). No decimal to salinity	no	0	0.62	0.15		0.3	48.3871			0.35	0.25	3		0.96				0.47	0.47				0.41	1.3					3.17073		5.37367	5.37367				4.68767	14.8633
AURORA1997-V2		V2974	19971013	287	-62.35	83.28	V297/8	Pack Ice. Bulk salinity in (ppt). No decimal to salinity	no	0	0.62	0.15		0.4	64.5161			0.45	0.35	2		2.89				0.47	0.47				0.63	0.66					1.04762		8.0605	8.0605				10.8045	11.319
AURORA1997-V2		V2974	19971013	287	-62.35	83.28	V297/8	Pack Ice. Bulk salinity in (ppt). No decimal to salinity	no	0	0.62	0.15		0.5	80.6452			0.55	0.45	0		1.57				0.26	0.26				0.42	0.82					1.95238
AURORA1997-V2		V2974	19971013	287	-62.35	83.28	V297/8	Pack Ice. Bulk salinity in (ppt). No decimal to salinity	no	0	0.62	0.15		0.585	94.3548			0.62	0.55	1		1.67				1.37	1.37				0.86	1.53					1.77907		46.991	46.991				29.498	52.479
AURORA1997-V2		V2975	19971013	287	-62.33	83.03	V297/9	Pack Ice. Bulk salinity in (ppt). No decimal to salinity	no	1	0.33	0.05		0.025	7.57576			0.05	0	4		0.98				2.14	2.14	0.55			0.25	5.99					23.96		18.3505	18.3505	4.71625			2.14375	51.3642
AURORA1997-V2		V2975	19971013	287	-62.33	83.03	V297/9	Pack Ice. Bulk salinity in (ppt). No decimal to salinity	no	0	0.33	0.05		0.1	30.303			0.15	0.05	5		0.87				2.49	2.49	0.56			0.22	8.5					38.6364		17.0814	17.0814	3.8416			1.5092	58.31
AURORA1997-V2		V2975	19971013	287	-62.33	83.03	V297/9	Pack Ice. Bulk salinity in (ppt). No decimal to salinity	no	0	0.33	0.05		0.2	60.6061			0.25	0.15	5		1.42				1.43	1.43	0.49			0.23	6.13					26.6522		9.8098	9.8098	3.3614			1.5778	42.0518
AURORA1997-V2		V2975	19971013	287	-62.33	83.03	V297/9	Pack Ice. Bulk salinity in (ppt). No decimal to salinity	no	0	0.33	0.05		0.29	87.8788			0.33	0.25	5		5.62				2.27	2.27	0.22			0.48	7.06					14.7083		15.5722	15.5722	1.5092			3.2928	48.4316
AURORA1997-V2		V2975	19971013	287	-62.33	83.03	V297/10	Pack Ice. Bulk salinity in (ppt). No decimal to salinity	no	1	0.33	0.05		0.025	7.57576			0.05	0	7		0.33				4.96	4.96				1.46	10.67					7.30822		24.304	24.304				7.154	52.283
AURORA1997-V2		V2975	19971013	287	-62.33	83.03	V297/10	Pack Ice. Bulk salinity in (ppt). No decimal to salinity	no	0	0.33	0.05		0.1	30.303			0.15	0.05	6		0.7				4.64	4.64	0.21			1.45	11.15					7.68966		26.5253	26.5253	1.2005			8.28917	63.7408
AURORA1997-V2		V2975	19971013	287	-62.33	83.03	V297/10	Pack Ice. Bulk salinity in (ppt). No decimal to salinity	no	0	0.33	0.05		0.2	60.6061			0.25	0.15	6		1.5				1.94	1.94				0.13	6.63					51		11.0903	11.0903				0.743167	37.9015
AURORA1997-V2		V2975	19971013	287	-62.33	83.03	V297/10	Pack Ice. Bulk salinity in (ppt). No decimal to salinity	no	0	0.33	0.05		0.29	87.8788			0.33	0.25	5		2.4				2.57	2.57				1.01	5.21					5.15842		17.6302	17.6302				6.9286	35.7406
AURORA1997-V2		V2976	19971016	290	-63.85	67.6	V297/11	Pack Ice. Bulk salinity in (ppt). No decimal to salinity	no	1	0.56	0.03		0.025	4.46429			0.05	0	20		0.25									1.02	28.93					28.3627		0	0				1.7493	49.6149
AURORA1997-V2		V2976	19971016	290	-63.85	67.6	V297/11	Pack Ice. Bulk salinity in (ppt). No decimal to salinity	no	0	0.56	0.03		0.1	17.8571			0.15	0.05	15											0.84	20.84					24.8095		0	0				1.9208	47.6541
AURORA1997-V2		V2976	19971016	290	-63.85	67.6	V297/11	Pack Ice. Bulk salinity in (ppt). No decimal to salinity	no	0	0.56	0.03		0.2	35.7143			0.25	0.15	5		1.45				4.59	4.59	0.22			0.26	8.61					33.1154		31.4874	31.4874	1.5092			1.7836	59.0646
AURORA1997-V2		V2976	19971016	290	-63.85	67.6	V297/11	Pack Ice. Bulk salinity in (ppt). No decimal to salinity	no	0	0.56	0.03		0.3	53.5714			0.35	0.25	3		1.35				2.87	2.87	0.17			0.22	7.29					33.1364		32.8137	32.8137	1.94367			2.51533	83.349
AURORA1997-V2		V2976	19971016	290	-63.85	67.6	V297/11	Pack Ice. Bulk salinity in (ppt). No decimal to salinity	no	0	0.56	0.03		0.4	71.4286			0.45	0.35	3		1.71				2.3	2.3				0.11	5.62					51.0909		26.2967	26.2967				1.25767	64.2553
AURORA1997-V2		V2976	19971016	290	-63.85	67.6	V297/11	Pack Ice. Bulk salinity in (ppt). No decimal to salinity	no	0	0.56	0.03		0.505	90.1786			0.56	0.45	3		7.38				2.77	2.77	0.19			0.58	3.9					6.72414		31.6703	31.6703	2.17233			6.63133	44.59
AURORA1997-V2		V2976	19971016	290	-63.85	67.6	V297/12	Pack Ice. Bulk salinity in (ppt). No decimal to salinity	no	1	0.56	0.03		0.025	4.46429			0.05	0	24		0.61									0.58	27.69					47.7414		0	0				0.828917	39.5736
AURORA1997-V2		V2976	19971016	290	-63.85	67.6	V297/12	Pack Ice. Bulk salinity in (ppt). No decimal to salinity	no	0	0.56	0.03		0.1	17.8571			0.15	0.05	12		0.17									0.22	13.21					60.0455		0	0				0.628833	37.7586
AURORA1997-V2		V2976	19971016	290	-63.85	67.6	V297/12	Pack Ice. Bulk salinity in (ppt). No decimal to salinity	no	0	0.56	0.03		0.2	35.7143			0.25	0.15	5		0.45				3.27	3.27				0.39	6.8					17.4359		22.4322	22.4322				2.6754	46.648
AURORA1997-V2		V2976	19971016	290	-63.85	67.6	V297/12	Pack Ice. Bulk salinity in (ppt). No decimal to salinity	no	0	0.56	0.03		0.3	53.5714			0.35	0.25	5		0.33				3.06	3.06				0.19	7.32					38.5263		20.9916	20.9916				1.3034	50.2152
AURORA1997-V2		V2976	19971016	290	-63.85	67.6	V297/12	Pack Ice. Bulk salinity in (ppt). No decimal to salinity	no	0	0.56	0.03		0.4	71.4286			0.45	0.35	5		0.61				2.37	2.37				0.11	6.28					57.0909		16.2582	16.2582				0.7546	43.0808
AURORA1997-V2		V2976	19971016	290	-63.85	67.6	V297/12	Pack Ice. Bulk salinity in (ppt). No decimal to salinity	no	0	0.56	0.03		0.505	90.1786			0.56	0.45	3		5.39				1.8	1.8				0.61	2.84					4.65574		20.58	20.58				6.97433	32.4707
AURORA1997-V2		V2976	19971016	290	-63.85	67.6	V297/13	Pack Ice. Bulk salinity in (ppt). No decimal to salinity	no	1	0.62	0.03		0.025	4.03226			0.05	0	13		0.57									0.23	13.42					58.3478		0	0				0.606846	35.4082
AURORA1997-V2		V2976	19971016	290	-63.85	67.6	V297/13	Pack Ice. Bulk salinity in (ppt). No decimal to salinity	no	0	0.62	0.03		0.1	16.129			0.15	0.05	10		0.33									0.27	10.95					40.5556		0	0				0.9261	37.5585
AURORA1997-V2		V2976	19971016	290	-63.85	67.6	V297/13	Pack Ice. Bulk salinity in (ppt). No decimal to salinity	no	0	0.62	0.03		0.2	32.2581			0.25	0.15	8		0.9				6.1	6.1				0.65	11.35					17.4615		26.1537	26.1537				2.78687	48.6631
AURORA1997-V2		V2976	19971016	290	-63.85	67.6	V297/13	Pack Ice. Bulk salinity in (ppt). No decimal to salinity	no	0	0.62	0.03		0.3	48.3871			0.35	0.25	5		1.31				2.86	2.86				0.3	7.38					24.6		19.6196	19.6196				2.058	50.6268
AURORA1997-V2		V2976	19971016	290	-63.85	67.6	V297/13	Pack Ice. Bulk salinity in (ppt). No decimal to salinity	no	0	0.62	0.03		0.4	64.5161			0.45	0.35	0		1.1				0.85	0.85				0.13	2.29					17.6154
AURORA1997-V2		V2976	19971016	290	-63.85	67.6	V297/13	Pack Ice. Bulk salinity in (ppt). No decimal to salinity	no	0	0.62	0.03		0.5	80.6452			0.55	0.45	4		2.12				1.67	1.67				0.1	2.85					28.5		14.3202	14.3202				0.8575	24.4387
AURORA1997-V2		V2976	19971016	290	-63.85	67.6	V297/13	Pack Ice. Bulk salinity in (ppt). No decimal to salinity	no	0	0.62	0.03		0.585	94.3548			0.62	0.55	4		21.65				2.45	2.45				1.95	2.78					1.42564		21.0087	21.0087				16.7212	23.8385
AURORA1997-V2		V2977	19971017	291	-64.73	66.8	V297/14	Pack Ice. Bulk salinity in (ppt). No decimal to salinity	no	1	0.92	0.4		0.025	2.71739			0.05	0	5		0.12				4.32	4.32	0.14			0.22	7.63					34.6818		29.6352	29.6352	0.9604			1.5092	52.3418
AURORA1997-V2		V2977	19971017	291	-64.73	66.8	V297/14	Pack Ice. Bulk salinity in (ppt). No decimal to salinity	no	0	0.92	0.4		0.1	10.8696			0.15	0.05	5		0.16				3.93	3.93				0.19	7.67					40.3684		26.9598	26.9598				1.3034	52.6162
AURORA1997-V2		V2977	19971017	291	-64.73	66.8	V297/14	Pack Ice. Bulk salinity in (ppt). No decimal to salinity	no	0	0.92	0.4		0.2	21.7391			0.25	0.15	3		0.7				1.51	1.51				0.15	7.23					48.2		17.2643	17.2643				1.715	82.663
AURORA1997-V2		V2977	19971017	291	-64.73	66.8	V297/14	Pack Ice. Bulk salinity in (ppt). No decimal to salinity	no	0	0.92	0.4		0.3	32.6087			0.35	0.25	3		1.1				0.87	0.87				0.22	5.53					25.1364		9.947	9.947				2.51533	63.2263
AURORA1997-V2		V2977	19971017	291	-64.73	66.8	V297/14	Pack Ice. Bulk salinity in (ppt). No decimal to salinity	no	0	0.92	0.4		0.4	43.4783			0.45	0.35	0		0.75				0.11	0.11				0.07	1.49					21.2857
AURORA1997-V2		V2977	19971017	291	-64.73	66.8	V297/14	Pack Ice. Bulk salinity in (ppt). No decimal to salinity	no	0	0.92	0.4		0.5	54.3478			0.55	0.45	1		2.26				0.33	0.33				0.15	1.09					7.26667		11.319	11.319				5.145	37.387
AURORA1997-V2		V2977	19971017	291	-64.73	66.8	V297/14	Pack Ice. Bulk salinity in (ppt). No decimal to salinity	no	0	0.92	0.4		0.6	65.2174			0.65	0.55	3		1.05				0.28	0.28				0.07	0.55					7.85714		3.20133	3.20133				0.800333	6.28833
AURORA1997-V2		V2977	19971017	291	-64.73	66.8	V297/14	Pack Ice. Bulk salinity in (ppt). No decimal to salinity	no	0	0.92	0.4		0.7	76.087			0.75	0.65	3		0.57				0.6	0.6				0.12	0.91					7.58333		6.86	6.86				1.372	10.4043
AURORA1997-V2		V2977	19971017	291	-64.73	66.8	V297/14	Pack Ice. Bulk salinity in (ppt). No decimal to salinity	no	0	0.92	0.4		0.8	86.9565			0.85	0.75	2		0.45				0.54	0.54				0.12	0.86					7.16667		9.261	9.261				2.058	14.749
AURORA1997-V2		V2977	19971017	291	-64.73	66.8	V297/14	Pack Ice. Bulk salinity in (ppt). No decimal to salinity	no	0	0.92	0.4		0.885	96.1957			0.92	0.85	4		38.36				6.73	6.73	0.12			2.47	7.9					3.19838		57.7097	57.7097	1.029			21.1803	67.7425
AURORA1997-V2		V2977	19971017	291	-64.73	66.8	V297/15	Pack Ice. Bulk salinity in (ppt). No decimal to salinity	no	1	0.92	0.4		0.025	2.71739			0.05	0	4		0.08				3.91	3.91	0.18			0.24	7.48					31.1667		33.5282	33.5282	1.5435			2.058	64.141
AURORA1997-V2		V2977	19971017	291	-64.73	66.8	V297/15	Pack Ice. Bulk salinity in (ppt). No decimal to salinity	no	0	0.92	0.4		0.1	10.8696			0.15	0.05	1		0.09				2.14	2.14	0.41			0.09	6.13					68.1111		73.402	73.402	14.063			3.087	210.259
AURORA1997-V2		V2977	19971017	291	-64.73	66.8	V297/15	Pack Ice. Bulk salinity in (ppt). No decimal to salinity	no	0	0.92	0.4		0.2	21.7391			0.25	0.15	2		0.32				0.66	0.66				0.08	5.71					71.375		11.319	11.319				1.372	97.9265
AURORA1997-V2		V2977	19971017	291	-64.73	66.8	V297/15	Pack Ice. Bulk salinity in (ppt). No decimal to salinity	no	0	0.92	0.4		0.3	32.6087			0.35	0.25	0		0.62				0.1	0.1				0.09	2.81					31.2222
AURORA1997-V2		V2977	19971017	291	-64.73	66.8	V297/15	Pack Ice. Bulk salinity in (ppt). No decimal to salinity	no	0	0.92	0.4		0.4	43.4783			0.45	0.35	0		0.23				0.1	0.1				0.06	2.6					43.3333
AURORA1997-V2		V2977	19971017	291	-64.73	66.8	V297/15	Pack Ice. Bulk salinity in (ppt). No decimal to salinity	no	0	0.92	0.4		0.5	54.3478			0.55	0.45	1		0.61				0.11	0.11				0.17	2.05					12.0588		3.773	3.773				5.831	70.315
AURORA1997-V2		V2977	19971017	291	-64.73	66.8	V297/15	Pack Ice. Bulk salinity in (ppt). No decimal to salinity	no	0	0.92	0.4		0.6	65.2174			0.65	0.55	1		0.4				0.1	0.1				0.09	1.37					15.2222		3.43	3.43				3.087	46.991
AURORA1997-V2		V2977	19971017	291	-64.73	66.8	V297/15	Pack Ice. Bulk salinity in (ppt). No decimal to salinity	no	0	0.92	0.4		0.7	76.087			0.75	0.65	3		0.33				0.19	0.19				0.11	1.87					17		2.17233	2.17233				1.25767	21.3803
AURORA1997-V2		V2977	19971017	291	-64.73	66.8	V297/15	Pack Ice. Bulk salinity in (ppt). No decimal to salinity	no	0	0.92	0.4		0.8	86.9565			0.85	0.75	3		0.47				0.25	0.25				0.07	1.62					23.1429		2.85833	2.85833				0.800333	18.522
AURORA1997-V2		V2977	19971017	291	-64.73	66.8	V297/15	Pack Ice. Bulk salinity in (ppt). No decimal to salinity	no	0	0.92	0.4		0.885	96.1957			0.92	0.85	4		10.56				4.42	4.42				1.46	6.26					4.28767		37.9015	37.9015				12.5195	53.6795
AURORA1997-V2		V2978	19971019	293	-64.57	66.28	V297/16	Pack Ice. Bulk salinity in (ppt). No decimal to salinity	no	1	0.65	0.2		0.025	3.84615			0.05	0	7		0.05				10.31	10.31				0.46	14.64					31.8261		50.519	50.519				2.254	71.736
AURORA1997-V2		V2978	19971019	293	-64.57	66.28	V297/16	Pack Ice. Bulk salinity in (ppt). No decimal to salinity	no	0	0.65	0.2		0.1	15.3846			0.15	0.05	0		0.1				2.12	2.12				0.1	3.79					37.9
AURORA1997-V2		V2978	19971019	293	-64.57	66.28	V297/16	Pack Ice. Bulk salinity in (ppt). No decimal to salinity	no	0	0.65	0.2		0.2	30.7692			0.25	0.15	0		0.02				3.71	3.71	0.39			0.16	6.83					42.6875
AURORA1997-V2		V2978	19971019	293	-64.57	66.28	V297/16	Pack Ice. Bulk salinity in (ppt). No decimal to salinity	no	0	0.65	0.2		0.3	46.1538			0.35	0.25	3		0.19				3.41	3.41				0.08	4.66					58.25		38.9877	38.9877				0.914667	53.2793
AURORA1997-V2		V2978	19971019	293	-64.57	66.28	V297/16	Pack Ice. Bulk salinity in (ppt). No decimal to salinity	no	0	0.65	0.2		0.4	61.5385			0.45	0.35	0		0.5				3.74	3.74				0.27	4.94					18.2963
AURORA1997-V2		V2978	19971019	293	-64.57	66.28	V297/16	Pack Ice. Bulk salinity in (ppt). No decimal to salinity	no	0	0.65	0.2		0.5	76.9231			0.55	0.45	4		0.53				3.98	3.98	1.16			0.49	8.36					17.0612		34.1285	34.1285	9.947			4.20175	71.687
AURORA1997-V2		V2978	19971019	293	-64.57	66.28	V297/16	Pack Ice. Bulk salinity in (ppt). No decimal to salinity	no	0	0.65	0.2		0.6	92.3077			0.65	0.55	0		1.65				3.59	3.59				0.27	5.7					21.1111
AURORA1997-V2		V2978	19971019	293	-64.57	66.28	V297/17	Pack Ice. Bulk salinity in (ppt). No decimal to salinity	no	1	0.65	0.2		0.025	3.84615			0.05	0	17		0.19									0.91	24.15					26.5385							1.83606	48.7262
AURORA1997-V2		V2978	19971019	293	-64.57	66.28	V297/17	Pack Ice. Bulk salinity in (ppt). No decimal to salinity	no	0	0.65	0.2		0.1	15.3846			0.15	0.05	3		0.07				5.11	5.11				0.16	7.47					46.6875		58.4243	58.4243				1.82933	85.407
AURORA1997-V2		V2978	19971019	293	-64.57	66.28	V297/17	Pack Ice. Bulk salinity in (ppt). No decimal to salinity	no	0	0.65	0.2		0.2	30.7692			0.25	0.15	4		0.06				4.91	4.91				0.17	7.25					42.6471		42.1032	42.1032				1.45775	62.1687
AURORA1997-V2		V2978	19971019	293	-64.57	66.28	V297/17	Pack Ice. Bulk salinity in (ppt). No decimal to salinity	no	0	0.65	0.2		0.3	46.1538			0.35	0.25	1		0.1				4.66	4.66				0.24	8.25					34.375		159.838	159.838				8.232	282.975
AURORA1997-V2		V2978	19971019	293	-64.57	66.28	V297/17	Pack Ice. Bulk salinity in (ppt). No decimal to salinity	no	0	0.65	0.2		0.4	61.5385			0.45	0.35	4		0.16				5.08	5.08				0.27	8.27					30.6296		43.561	43.561				2.31525	70.9152
AURORA1997-V2		V2978	19971019	293	-64.57	66.28	V297/17	Pack Ice. Bulk salinity in (ppt). No decimal to salinity	no	0	0.65	0.2		0.5	76.9231			0.55	0.45	3		0.17				4.33	4.33				0.23	6.1					26.5217		49.5063	49.5063				2.62967	69.7433
AURORA1997-V2		V2978	19971019	293	-64.57	66.28	V297/17	Pack Ice. Bulk salinity in (ppt). No decimal to salinity	no	0	0.65	0.2		0.6	92.3077			0.65	0.55	3		1.1				4.35	4.35				0.41	6.66					16.2439		49.735	49.735				4.68767	76.146
ROAV98	First-Year	1	19981106	311	-64.07	176.74	3325.1	nutrient concentration and salinity are brine concentration and salinity (centrifugation)	no	1	0.83	0.05		0.07	8.43373			0.14	0
ROAV98	First-Year	1	19981106	311	-64.07	176.74	3325.1	nutrient concentration and salinity are brine concentration and salinity (centrifugation)	no	0	0.83	0.05		0.255	30.7229			0.37	0.14	30.1						8.76	8.76	0.165	14.31	23.235	1.62	48.45			14.3426	0.479567	29.9074		9.98233	9.98233	0.188023	16.3067	26.4771	1.84605	55.2105
ROAV98	First-Year	1	19981106	311	-64.07	176.74	3325.1	nutrient concentration and salinity are brine concentration and salinity (centrifugation)	no	0	0.83	0.05		0.495	59.6386			0.62	0.37	31						6.01	6.01	0.13	5.71	11.85	1.215	72.9			9.75309	0.162551	60		6.64977	6.64977	0.143839	6.31784	13.1115	1.34434	80.6603
ROAV98	First-Year	1	19981106	311	-64.07	176.74	3325.1	nutrient concentration and salinity are brine concentration and salinity (centrifugation)	no	0	0.83	0.05		0.725	87.3494			0.83	0.62	33						6.825	6.825	0.21	11.58	18.615	0.705	78.75			26.4043	0.236381	111.702		7.09386	7.09386	0.218273	12.0362	19.3483	0.732773	81.8523
ROAV98	First-Year	2	19981106	311	-64.5	177		nutrient concentration and salinity are brine concentration and salinity (centrifugation)	no	1	0.74	0.05		0.085	11.4865			0.17	0	45.43						8.985	8.985	0.27	5.55	14.805	1.845	79.725			8.02439	0.185701	43.2114		6.78374	6.78374	0.203852	4.19029	11.1779	1.39299	60.193
ROAV98	First-Year	2	19981106	311	-64.5	177		nutrient concentration and salinity are brine concentration and salinity (centrifugation)	no	0	0.74	0.05		0.26	35.1351			0.35	0.17	38.8						10.89	10.89	0.255	3.81	14.955	1.5	78.375			9.97	0.190813	52.25		9.62698	9.62698	0.225425	3.36812	13.2205	1.32603	69.2851
ROAV98	First-Year	2	19981106	311	-64.5	177		nutrient concentration and salinity are brine concentration and salinity (centrifugation)	no	0	0.74	0.05		0.485	65.5405			0.62	0.35
ROAV98	First-Year	2	19981106	311	-64.5	177		nutrient concentration and salinity are brine concentration and salinity (centrifugation)	no	0	0.74	0.05		0.68	91.8919			0.74	0.62	34.5						11.025	11.025	0.33	6.285	17.64	1.32	69.9			13.3636	0.252361	52.9545		10.9611	10.9611	0.328087	6.24857	17.5377	1.31235	69.4948
ROAV98	First-Year	3	19981107	311	-65	177		nutrient concentration and salinity are brine concentration and salinity (centrifugation)	no	1	0.51	0.04		0.06	11.7647			0.12	0	46.8						4.245	4.245	0.39	4.92	9.555	1.35	99.75			7.07778	10.4396	73.8889		3.11119	3.11119	0.285833	3.6059	7.00292	0.989423	73.1074
ROAV98	First-Year	3	19981107	311	-65	177		nutrient concentration and salinity are brine concentration and salinity (centrifugation)	no	0	0.51	0.04		0.18	35.2941			0.24	0.12	40.6						3.46	3.46	0.28	8.56	12.3	0.96	87.2			12.8125	7.08943	90.8333		2.9231	2.9231	0.236552	7.23172	10.3914	0.811034	73.669
ROAV98	First-Year	3	19981107	311	-65	177		nutrient concentration and salinity are brine concentration and salinity (centrifugation)	no	0	0.51	0.04		0.305	59.8039			0.37	0.24	35.2						12.8	12.8	0.29	2.3	15.39	1.48	56.55			10.3986	3.67446	38.2095		12.4727	12.4727	0.282585	2.24119	14.9965	1.44216	55.1041
ROAV98	First-Year	3	19981107	311	-65	177		nutrient concentration and salinity are brine concentration and salinity (centrifugation)	no	0	0.51	0.04		0.44	86.2745			0.51	0.37	32						16.8	16.8	0.24	8.22	25.26	1.2	48.8			21.05	1.93191	40.6667		18.0075	18.0075	0.25725	8.81081	27.0756	1.28625	52.3075
ROAV98	First-Year	5	19981107	311	-66	177		nutrient concentration and salinity are brine concentration and salinity (centrifugation)	no	1	0.35	0.06		0.275	78.5714			0.35	0.2	47.4						29.82	29.82	0.3	4.26	34.38	2.52	100.4			13.6429	2.9203	39.8413		21.5786	21.5786	0.217089	3.08266	24.8784	1.82354	72.6523
ROAV98	First-Year	6	19981108	312	-66.5	177.05		nutrient concentration and salinity are brine concentration and salinity (centrifugation)	no	1	0.44	0.1		0.05	11.3636			0.1	0	48.6						10.845	10.845	0.165	8.88	19.89	1.32	127.5			15.0682	6.41026	96.5909		7.65398	7.65398	0.116451	6.26716	14.0376	0.931605	89.9846
ROAV98	First-Year	6	19981108	312	-66.5	177.05		nutrient concentration and salinity are brine concentration and salinity (centrifugation)	no	0	0.44	0.1		0.185	42.0455			0.27	0.1	45.6						11.07	11.07	0.135	8.37	19.575	1.335	108.6			14.6629	5.54789	81.3483		8.32678	8.32678	0.101546	6.29586	14.7242	1.00418	81.6882
ROAV98	First-Year	6	19981108	312	-66.5	177.05		nutrient concentration and salinity are brine concentration and salinity (centrifugation)	no	0	0.44	0.1		0.355	80.6818			0.44	0.27	33.9						17.22	17.22	0.19	4.8	22.21	1.29	73.8							17.4232	17.4232	0.192242	4.85664	22.4721	1.30522	74.6708
ROAV98	First-Year	7	19981108	312	-67.02	176.99		nutrient concentration and salinity are brine concentration and salinity (centrifugation)	no	1	0.58	0.08		0.115	19.8276			0.23	0	57.5						34.425	34.425	0.615	9.48	44.52	1.635	98.85			27.2294	2.22035	60.4587		20.5353	20.5353	0.366861	5.65503	26.5571	0.975313	58.9662
ROAV98	First-Year	7	19981108	312	-67.02	176.99		nutrient concentration and salinity are brine concentration and salinity (centrifugation)	no	0	0.58	0.08		0.32	55.1724			0.41	0.23	44.3						14.685	14.685	0.42	7.425	22.53	1.185	96.45			19.0127	4.28096	81.3924		11.3701	11.3701	0.325192	5.74893	17.4442	0.917506	74.678
ROAV98	First-Year	7	19981108	312	-67.02	176.99		nutrient concentration and salinity are brine concentration and salinity (centrifugation)	no	0	0.58	0.08		0.495	85.3448			0.58	0.41	42.4						19.065	19.065	0.51	12.96	32.535	1.635	45.75			19.8991	1.40618	27.9817		15.4229	15.4229	0.412571	10.4842	26.3196	1.32265	37.01
ROAV98	First-Year	7	19981108	312	-67.02	176.99		nutrient concentration and salinity are brine concentration and salinity (centrifugation)	no	0	0.58	0.08		0.495	85.3448			0.58	0.41	39						20.78	20.78	0.6	11.09	32.47	1.67	19.3			19.4431	0.594395	11.5569		18.2757	18.2757	0.527692	9.75351	28.5569	1.46874	16.9741
ROAV98	First-Year	7	19981108	312	-67.02	176.99		nutrient concentration and salinity are brine concentration and salinity (centrifugation)	no	1	0.58	0.08		0.115	19.8276			0.23	0	57.5						34.425	34.425	0.615	9.48	44.52	1.635	98.85			27.2294	2.22035	60.4587		20.5353	20.5353	0.366861	5.65503	26.5571	0.975313	58.9662
ROAV98	First-Year	7	19981108	312	-67.02	176.99		nutrient concentration and salinity are brine concentration and salinity (centrifugation)	no	0	0.58	0.08		0.32	55.1724			0.41	0.23	44.3						14.685	14.685	0.42	7.425	22.53	1.185	96.45			19.0127	4.28096	81.3924		11.3701	11.3701	0.325192	5.74893	17.4442	0.917506	74.678
ROAV98	First-Year	7	19981108	312	-67.02	176.99		nutrient concentration and salinity are brine concentration and salinity (centrifugation)	no	0	0.58	0.08		0.495	85.3448			0.58	0.41	42.4						19.065	19.065	0.51	12.96	32.535	1.635	45.75			19.8991	1.40618	27.9817		15.4229	15.4229	0.412571	10.4842	26.3196	1.32265	37.01
ROAV98	First-Year	7	19981108	312	-67.02	176.99		nutrient concentration and salinity are brine concentration and salinity (centrifugation)	no	1	0.58	0.08		0.495	85.3448			0.58	0.41	39						20.78	20.78	0.6	11.09	32.47	1.67	19.3			19.4431	0.594395	11.5569		18.2757	18.2757	0.527692	9.75351	28.5569	1.46874	16.9741
ROAV98	First-Year	8	19981108	313	-67.5	176.97		nutrient concentration and salinity are brine concentration and salinity (centrifugation)	no	1	0.9	0.39		0.05	5.55556			0.1	0	52.2						29.67	29.67	0.45	12	42.12	6.48	109.5			6.5	0.384658	16.8981		19.4958	19.4958	0.29569	7.88506	27.6766	4.25793	71.9511
ROAV98	First-Year	8	19981108	313	-67.5	176.97		nutrient concentration and salinity are brine concentration and salinity (centrifugation)	no	0	0.9	0.39		0.2	22.2222			0.3	0.1	47.8						33.735	33.735	0.555	6.81	41.1	7.88	104.7			5.21574	0.39255	13.2868		24.2073	24.2073	0.398253	4.88667	29.4923	5.65448	75.1299
ROAV98	First-Year	8	19981108	313	-67.5	176.97		nutrient concentration and salinity are brine concentration and salinity (centrifugation)	no	0	0.9	0.39		0.4	44.4444			0.5	0.3	39.6						16.72	16.72	0.4	5.05	22.17	8.64	95.6			2.56597	0.231904	11.0648		14.4822	14.4822	0.346465	4.37412	19.2028	7.48364	82.8051
ROAV98	First-Year	8	19981108	313	-67.5	176.97		nutrient concentration and salinity are brine concentration and salinity (centrifugation)	no	0	0.9	0.39		0.6	66.6667			0.7	0.5	34.2						8.75	8.75	0.29	4.26	13.3	2.25	73.1			5.91111	0.181943	32.4889		8.77558	8.77558	0.290848	4.27246	13.3389	2.25658	73.3137
ROAV98	First-Year	8	19981108	313	-67.5	176.97		nutrient concentration and salinity are brine concentration and salinity (centrifugation)	no	0	0.9	0.39		0.8	88.8889			0.9	0.7	32.6						5.205	5.205	0.09	4.155	9.45	1.275	32.55			7.41176	0.290323	25.5294		5.47643	5.47643	0.0946933	4.37167	9.94279	1.34149	34.2474
ROAV98	First-Year	11	19981109	314	-69.03	176.46		nutrient concentration and salinity are brine concentration and salinity (centrifugation)	no	1	0.6	0.08		0.1	16.6667			0.2	0	68.2						40.66	40.66	0.6	5.86	47.12	2.46	107.4			19.1545	0.438734	43.6585		20.4492	20.4492	0.30176	2.94718	23.6982	1.23721	54.015
ROAV98	First-Year	11	19981109	314	-69.03	176.46		nutrient concentration and salinity are brine concentration and salinity (centrifugation)	no	0	0.6	0.08		0.25	41.6667			0.3	0.2	60						18.24	18.24	0.4	5.68	24.32	1.28	87.4			19	0.278261	68.2812		10.4272	10.4272	0.228667	3.24707	13.9029	0.731733	49.9637
ROAV98	First-Year	11	19981109	314	-69.03	176.46		nutrient concentration and salinity are brine concentration and salinity (centrifugation)	no	0	0.6	0.08		0.35	58.3333			0.4	0.3	56.1						7.26	7.26	0.3	6.8	14.36	0.96	61.8			14.9583	0.232362	64.375		4.43882	4.43882	0.183422	4.15758	8.77982	0.586952	37.785
ROAV98	First-Year	11	19981109	314	-69.03	176.46		nutrient concentration and salinity are brine concentration and salinity (centrifugation)	no	0	0.6	0.08		0.45	75			0.5	0.4	42.4						9.22	9.22	0.36	7.76	17.34	0.9	46			19.2667	0.376957	51.1111		7.45863	7.45863	0.291226	6.27755	14.0274	0.728066	37.2123
ROAV98	First-Year	11	19981109	314	-69.03	176.46		nutrient concentration and salinity are brine concentration and salinity (centrifugation)	no	0	0.6	0.08		0.55	91.6667			0.6	0.5	32.7						12.86	12.86	0.26	10.26	23.38	1.44	38.8			16.2361	0.602577	26.9444		13.4892	13.4892	0.272722	10.762	24.524	1.51046	40.6985
ROAV98	First-Year	12	19981109	314	-69.5	175.79		nutrient concentration and salinity are brine concentration and salinity (centrifugation)	no	1	0.6	0.04		0.1	16.6667			0.2	0	62.5						55.3	55.3	1	20.6	76.9	3.5	104			21.9714	0.739423	29.7143		30.3486	30.3486	0.5488	11.3053	42.2027	1.9208	57.0752
ROAV98	First-Year	12	19981109	314	-69.5	175.79		nutrient concentration and salinity are brine concentration and salinity (centrifugation)	no	0	0.6	0.04		0.25	41.6667			0.3	0.2	53.3						43.4	43.4	0.6	36	80	2	70			40	1.14286	35		27.9291	27.9291	0.386116	23.167	51.4822	1.28705	45.0469
ROAV98	First-Year	12	19981109	314	-69.5	175.79		nutrient concentration and salinity are brine concentration and salinity (centrifugation)	no	0	0.6	0.04		0.35	58.3333			0.4	0.3	46.6						24.57	24.57	0.6	20.34	45.51	1.95	58.8			23.3385	0.77398	30.1538		18.0848	18.0848	0.441631	14.9713	33.4977	1.4353	43.2798
ROAV98	First-Year	12	19981109	314	-69.5	175.79		nutrient concentration and salinity are brine concentration and salinity (centrifugation)	no	0	0.6	0.04		0.45	75			0.5	0.4	38.8						17.6	17.6	0	21	38.6	0.8	26			48.25	1.48462	32.5		15.5588	15.5588	0	18.5644	34.1232	0.707216	22.9845
ROAV98	First-Year	12	19981109	314	-69.5	175.79		nutrient concentration and salinity are brine concentration and salinity (centrifugation)	no	0	0.6	0.04		0.55	91.6667			0.6	0.5	35.1						11.9	11.9	0	14.7	26.6	0.5	17			53.2	1.56471	34		11.6288	11.6288	0	14.365	25.9937	0.488604	16.6125
ROAV98	First-Year	13	19981109	314	-69.99	175.29		nutrient concentration and salinity are brine concentration and salinity (centrifugation)	no	1	0.95	0.05		0.125	13.1579			0.25	0	69.2						62.79	62.79	0.84	7.8	71.43	4.29	149.1			16.6503	0.479074	34.7552		31.1228	31.1228	0.416358	3.86618	35.4053	2.1264	73.9036
[truncated: 1,402 more rows]

## Sheet: sackholes
Cruise	Station Number	Date	julian day	Latitude	Longitude:	ice thickness	average depth	average depth	Bulk Salinity	Bulk dO18	Bulk Chlorophyll	Bulk Nitrate + Nitrite	Bulk Nitrate	Bulk Nitrate or Nitrate+Nitrite (if no nitrite )	Bulk Nitrite	Bulk Ammonium	Bulk DIN	Bulk Phosphate	Bulk Silicate	Salinity-Normalized Nitrate + Nitrite	Salinity-Normalized Nitrate	Salinity-Normalized Nitrate or Nitrate+Nitrite (if no nitrite )	Salinity-Normalized Nitrite	Salinity-Normalized Ammonium	Salinity-Normalized DIN	Salinity-Normalized Phosphate	Salinity-Normalized Silicate
[truncated: 95 more rows]
